# Supplementary material for: Update of the risk assessment of inorganic arsenic in food
Source: PubMed Central journal article supplement (PMC10794945; doi:10.2903/j.efsa.2024.8488), 2024-01-18

Annex to: Update of the risk assessment of inorganic arsenic in food.  
doi:10.2903/j.efsa.2024.8488

© European Food Safety Authority, 2024

## **Annex E5 Benchmark concentration modelling reports**

### **Relative increase of the background incidence after adjustment for confounders by 5%**

Annex E5 provides a comprehensive overview of the benchmark concentration (BMC) analyses carried out for the studies used in the uncertainty analysis, employing the model averaging technique. In contrast to the used benchmark dose (BMD) modelling approach, which utilised total iAs exposure as the exposure metric for BMD analyses, the BMC analyses in this Annex are based on water iAs concentrations ( $\mu\text{g/L}$ ) or water iAs daily intakes ( $\mu\text{g}$ ) in the case of Steinmaus et al. (2014a). Using water iAs concentrations (rather than total exposures) as a basis for modelling creates a dose-response shape that differs somewhat due to differences in relative dose spacing. This is illustrated in the Appendix of this Annex. The BMC analyses were conducted in accordance with the EFSA BMD guidance (EFSA Scientific Committee, 2022).

#### **E5.1 Selection of the BMR**

As BMR the CONTAM Panel decided to use a relative increase of the background incidence after adjustment for confounders by 5%.

#### **E5.2 Software Used**

Results are obtained using the EFSA web-tool for Bayesian BMD analysis, which uses the R-package [BMABMDR] version 0.0.0.9060 for the underlying calculations.

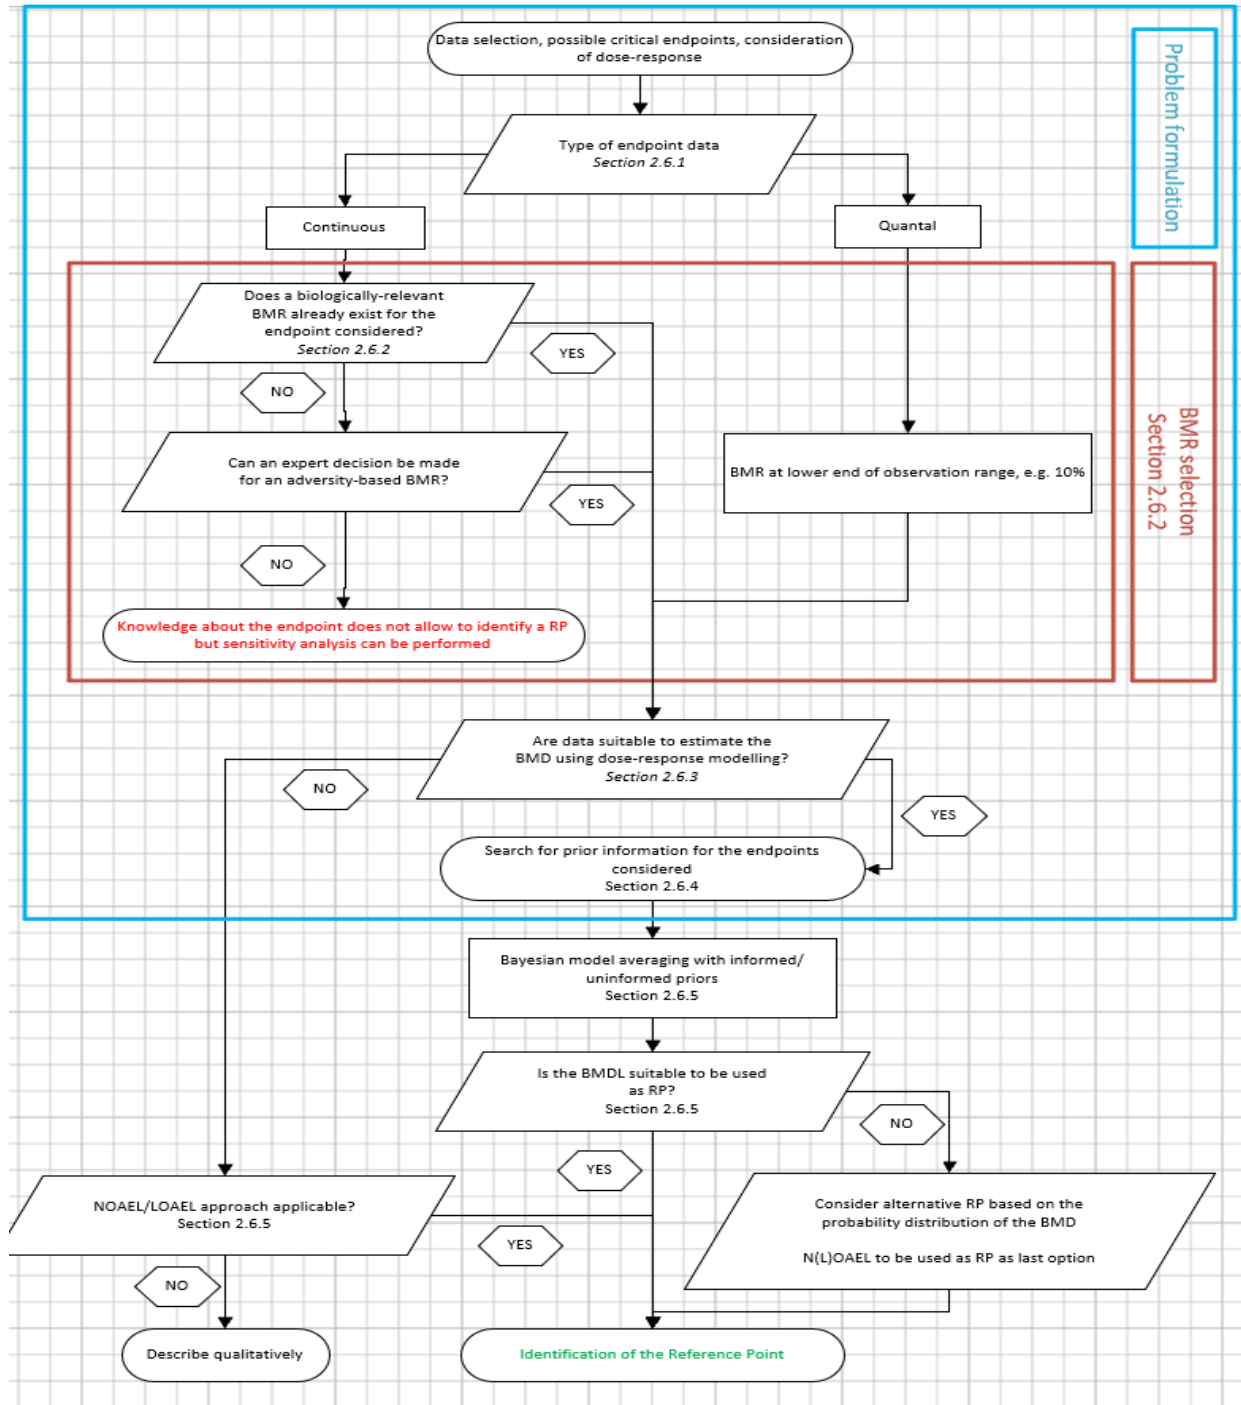

Flowchart to derive a Reference Point (RP) from a dose-response dataset of a specified endpoint, using BMD analysis. Figure from EFSA BMD guidance (EFSA Scientific Committee, 2022).

Table 1: Comparison of the BMD results using different exposure metrics for modelling (total iAs exposure vs. water iAs concentrations/daily iAs intake in water).

| Study                                                                            | Exposure metric for modelling                                          |                                                                       |                                                                        |                                                                                                          |                                                                       |                                                                        |
|----------------------------------------------------------------------------------|------------------------------------------------------------------------|-----------------------------------------------------------------------|------------------------------------------------------------------------|----------------------------------------------------------------------------------------------------------|-----------------------------------------------------------------------|------------------------------------------------------------------------|
|                                                                                  | Total iAs exposure<br>( $\mu\text{g}/\text{kg}$ b.w. per day)          |                                                                       |                                                                        | Water iAs concentrations<br>( $\mu\text{g}/\text{L}$ ) or daily iAs intake<br>in water ( $\mu\text{g}$ ) |                                                                       |                                                                        |
|                                                                                  | BMDL <sub>05</sub><br>( $\mu\text{g}/\text{kg}$<br>b.w.<br>per<br>day) | BMD <sub>05</sub><br>( $\mu\text{g}/\text{kg}$<br>b.w.<br>per<br>day) | BMDU <sub>05</sub><br>( $\mu\text{g}/\text{kg}$<br>b.w.<br>per<br>day) | BMDL <sub>05</sub><br>( $\mu\text{g}/\text{kg}$<br>b.w.<br>per<br>day)                                   | BMD <sub>05</sub><br>( $\mu\text{g}/\text{kg}$<br>b.w.<br>per<br>day) | BMDU <sub>05</sub><br>( $\mu\text{g}/\text{kg}$<br>b.w.<br>per<br>day) |
| Chen et al. (2010a) lung cancer                                                  | 1.21                                                                   | 4.97                                                                  | 10.80                                                                  | 1.74                                                                                                     | 5.30                                                                  | 10.98                                                                  |
| Chen et al. (2010b) bladder cancer                                               | 0.15                                                                   | 1.33                                                                  | 5.46                                                                   | 0.77                                                                                                     | 1.78                                                                  | 5.76                                                                   |
| Leonardi et al. (2012) skin cancer                                               | 0.011                                                                  | 0.047                                                                 | 0.079                                                                  | 0.11                                                                                                     | 0.12                                                                  | 0.17                                                                   |
| Pierce et al. (2011) skin lesions                                                | 0.80                                                                   | 1.61                                                                  | 2.86                                                                   | 1.56                                                                                                     | 2.02                                                                  | 3.07                                                                   |
| Steinmaus et al. (2014a) lung cancer (the highest 5-year average, daily intakes) | 0.17                                                                   | 0.76                                                                  | 1.71                                                                   | 0.36                                                                                                     | 0.59                                                                  | 0.96                                                                   |

### E5.3 BMC modelling reports

#### Chen et al. (2010a) lung cancer, relative BMR 5%

##### Data Description

The endpoint to be analyzed is: Adj.cases for lung cancer

Data used for analysis:

| Water.conc | Adj..cases | N    |
|------------|------------|------|
| 5.00       | 48         | 2288 |
| 29.95      | 48         | 2093 |
| 74.95      | 19         | 907  |
| 199.95     | 29         | 909  |
| 300.00     | 33         | 691  |

The 'Value for CES' is set to 0.00107143.

Extended dose range is not applied.

Informative background prior: min: 0.020769231; the most likely: 0.020979021; max: 0.021188811. Shape parameter is applied.

The 'Sampling Method' is set to Bridge Sampling.

##### Results

*Information pertaining to this endpoint.*

##### Goodness of Fit

Best fitting model fits sufficiently well (Bayes factor is 1.96e-04).

##### Model Averaged BMC

| Model          | Type | BMCL   | BMC    | BMCU    |
|----------------|------|--------|--------|---------|
| Model Averaged | BS   | 19.883 | 85.237 | 189.357 |

**Estimated BMCs per model**

| Model | BMCL   | BMC     | BMCU    | Model Weights | Converged |
|-------|--------|---------|---------|---------------|-----------|
| E4_Q  | 25.001 | 88.284  | 189.749 | 0.143         | 1         |
| IE4_Q | 60.651 | 140.797 | 273.169 | 0.076         | 0         |
| H4_Q  | 22.833 | 87.509  | 171.571 | 0.139         | 1         |
| LN4_Q | 45.710 | 116.966 | 210.578 | 0.110         | 1         |
| G4_Q  | 26.825 | 91.403  | 171.944 | 0.167         | 1         |
| QE4_Q | 14.730 | 29.464  | 58.942  | 0.144         | 1         |
| P4_Q  | 22.633 | 85.873  | 178.801 | 0.111         | 1         |
| L4_Q  | 22.743 | 84.503  | 179.796 | 0.110         | 1         |

Plots of Fitted Models

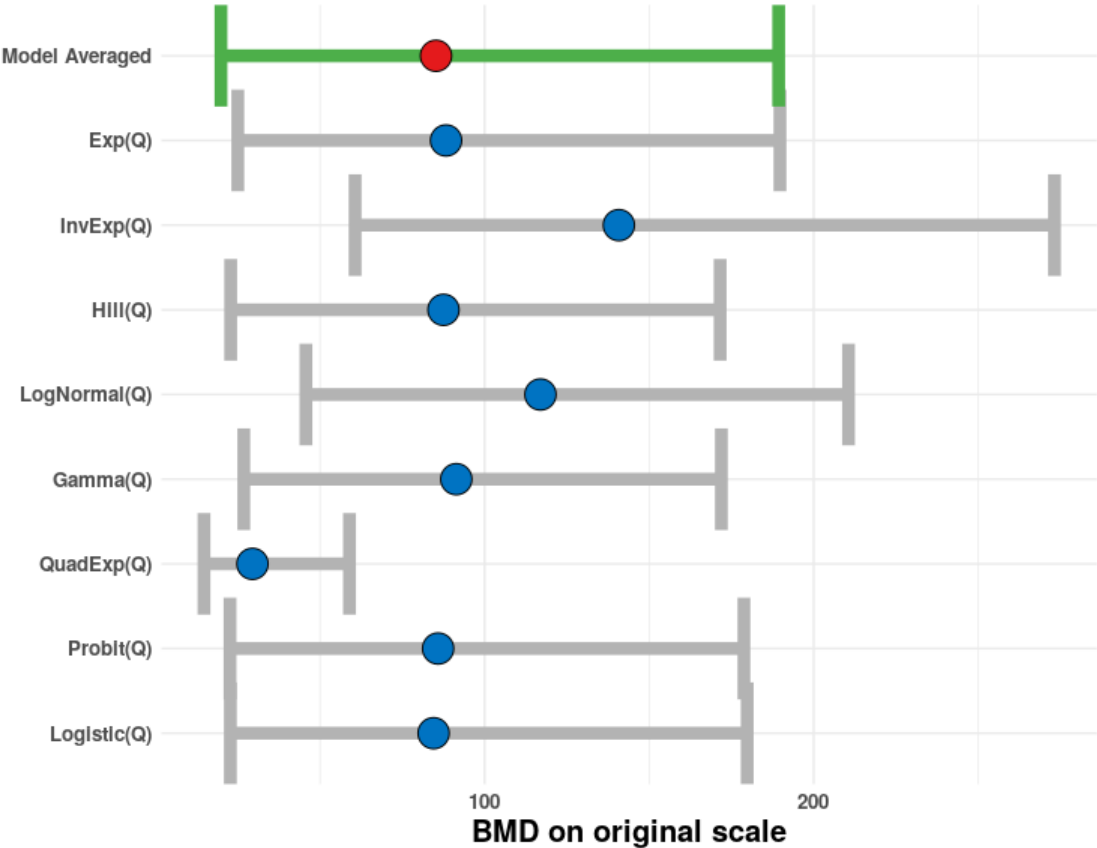

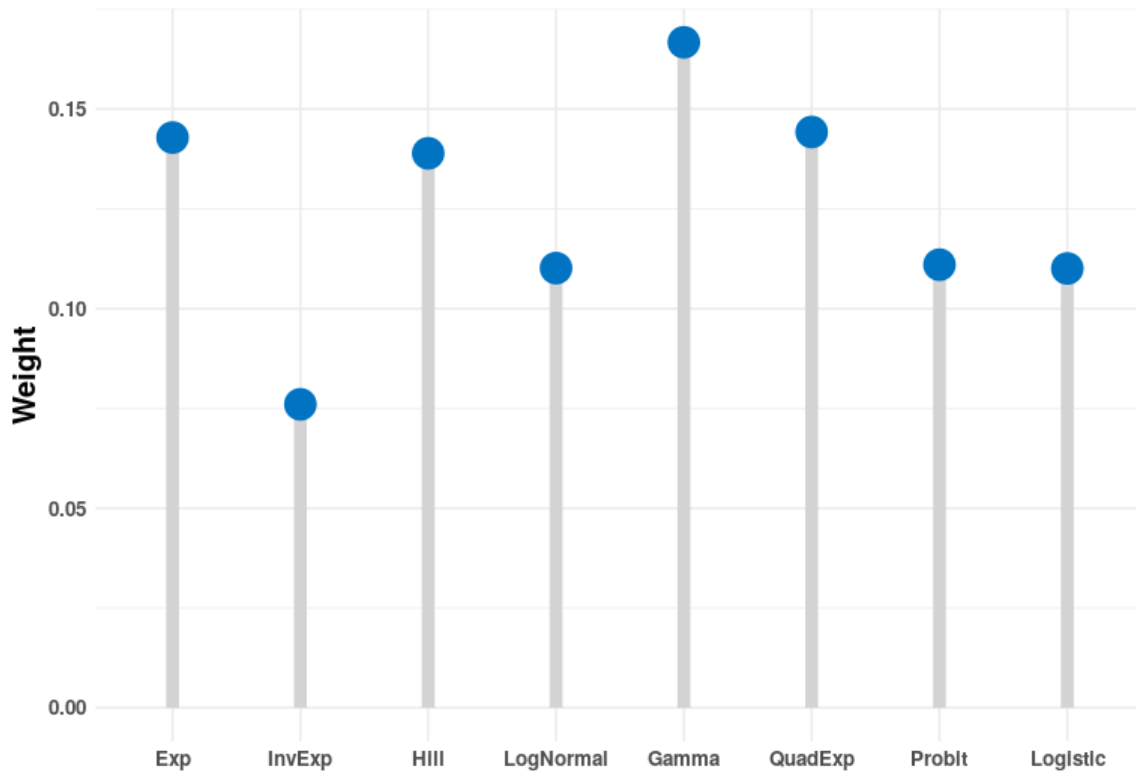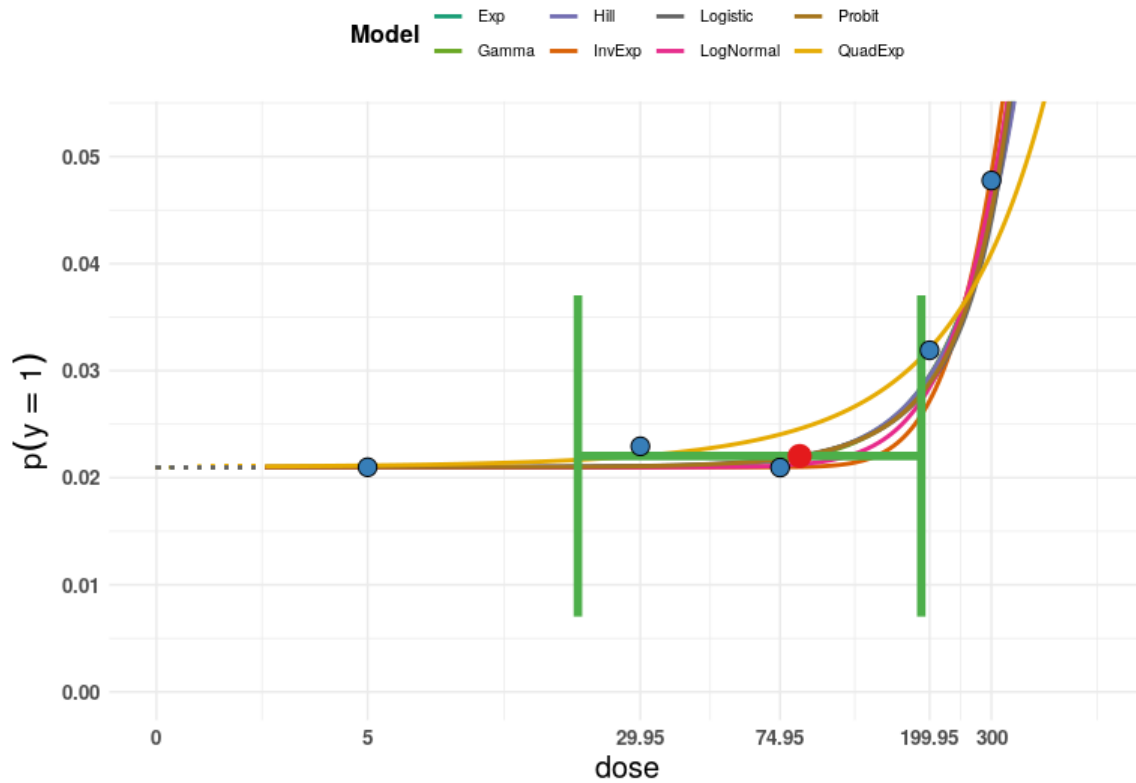

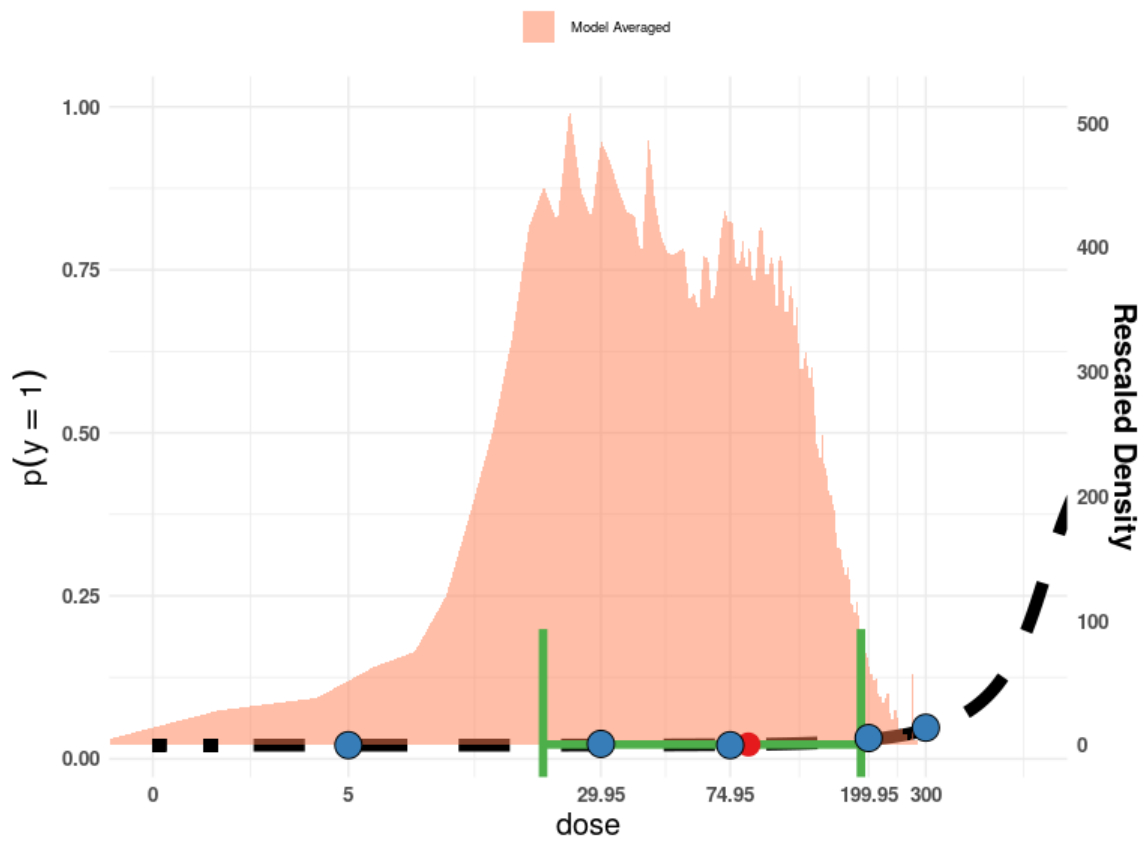



## Chen et al. (2010b) bladder cancer, relative BMR 5%

### Data Description

The endpoint to be analyzed is: Adj.cases for bladder cancer

Data used for analysis:

| Water.conc.µg/L | Adj..cases | N    |
|-----------------|------------|------|
| 5.00            | 3          | 2288 |
| 29.95           | 5          | 2093 |
| 74.95           | 3          | 907  |
| 199.95          | 7          | 909  |
| 300.00          | 11         | 691  |

The 'Value for CES' is set to 6.565e-05.

Extended dose range is not applied.

Informative background prior: min: 0.00111451; the most likely: 0.001311189; max: 0.001507867. Shape parameter is applied.

The 'Sampling Method' is set to Bridge Sampling.

### Results

*Information pertaining to this endpoint.*

#### Goodness of Fit

Best fitting model fits sufficiently well (Bayes factor is 3.06e-04).

#### Model Averaged BMC

| Model          | Type | BMCL  | BMC    | BMCU   |
|----------------|------|-------|--------|--------|
| Model Averaged | BS   | 2.105 | 20.724 | 93.584 |

#### Estimated BMCs per model

| Model | BMCL   | BMC    | BMCU    | Model Weights | Converged |
|-------|--------|--------|---------|---------------|-----------|
| E4_Q  | 3.510  | 23.710 | 82.183  | 0.169         | 1         |
| IE4_Q | 15.651 | 68.728 | 130.696 | 0.062         | 1         |
| H4_Q  | 3.814  | 24.688 | 83.679  | 0.164         | 1         |
| LN4_Q | 8.238  | 47.193 | 112.387 | 0.115         | 1         |
| G4_Q  | 3.984  | 27.806 | 90.542  | 0.205         | 1         |
| QE4_Q | 1.620  | 3.510  | 10.255  | 0.198         | 1         |
| P4_Q  | 2.446  | 16.957 | 70.815  | 0.049         | 1         |
| L4_Q  | 1.662  | 17.433 | 69.759  | 0.038         | 1         |

**Plots of Fitted Models**

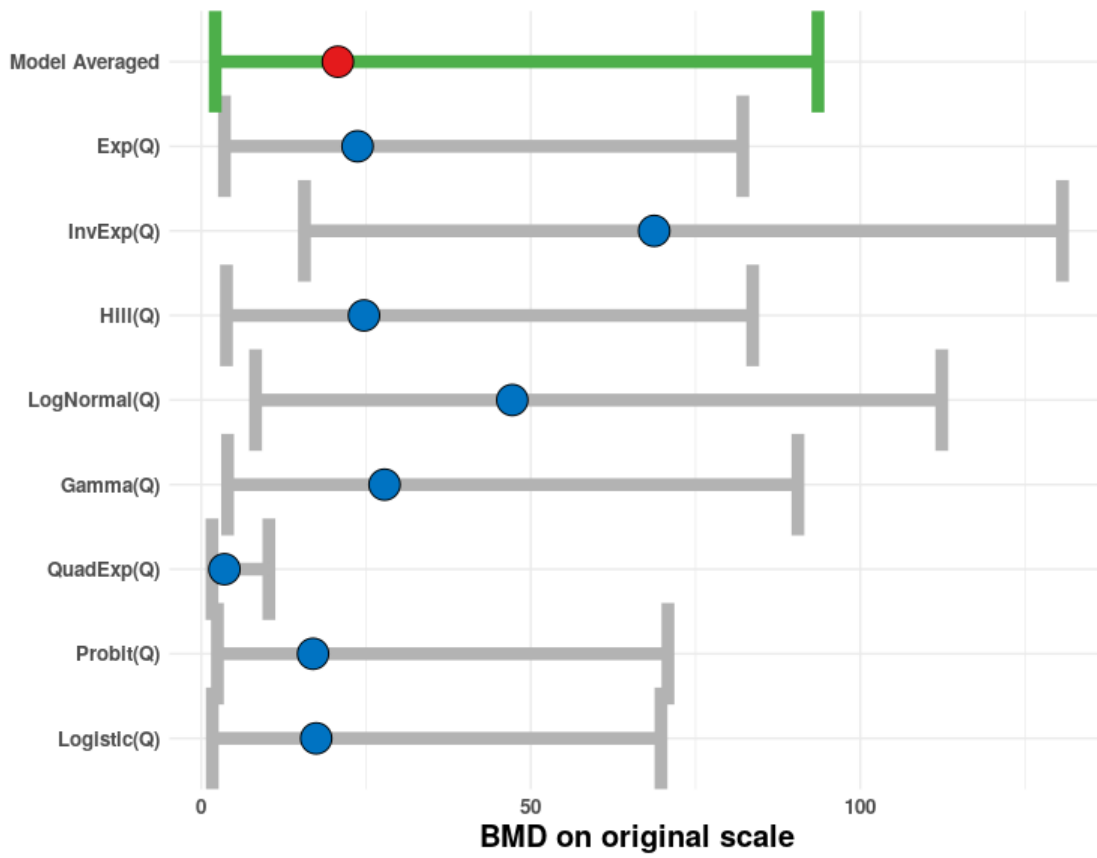

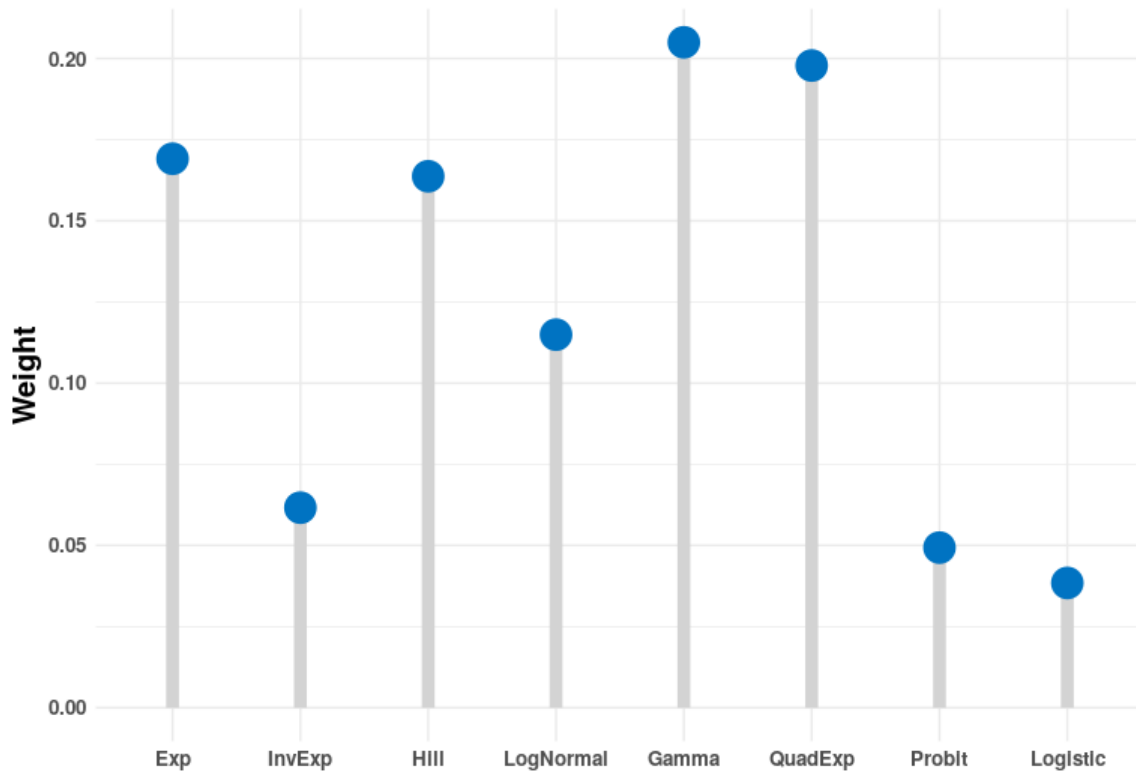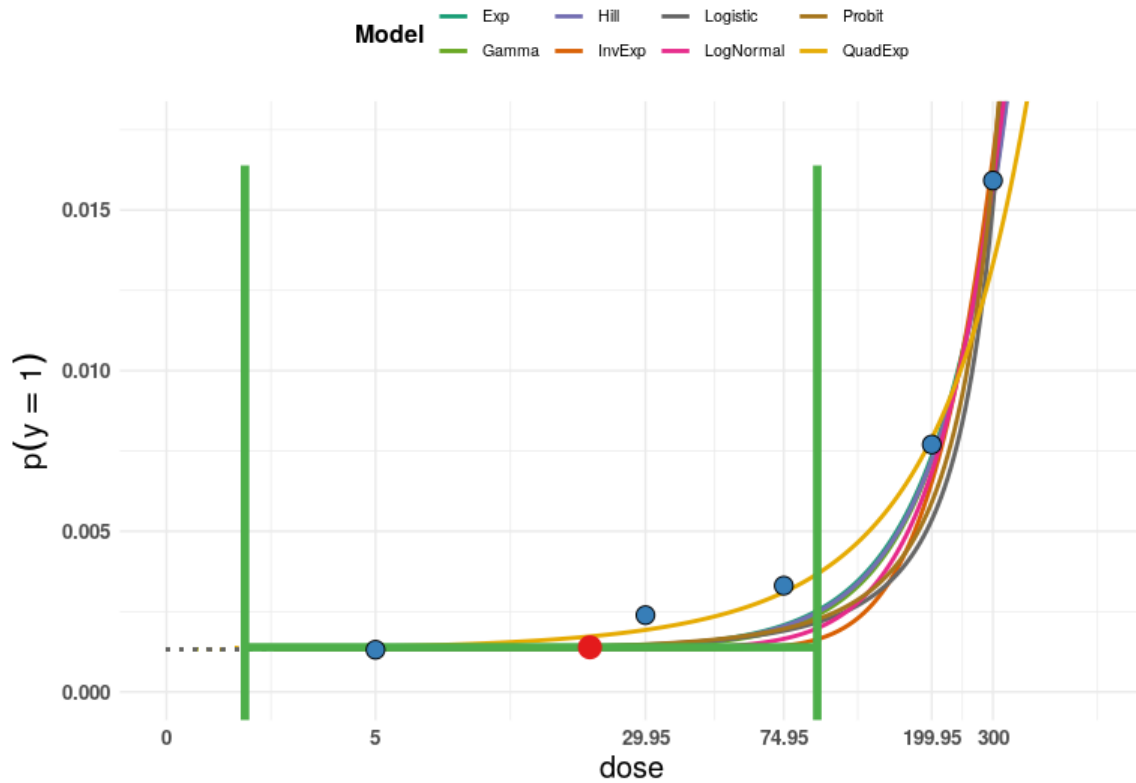

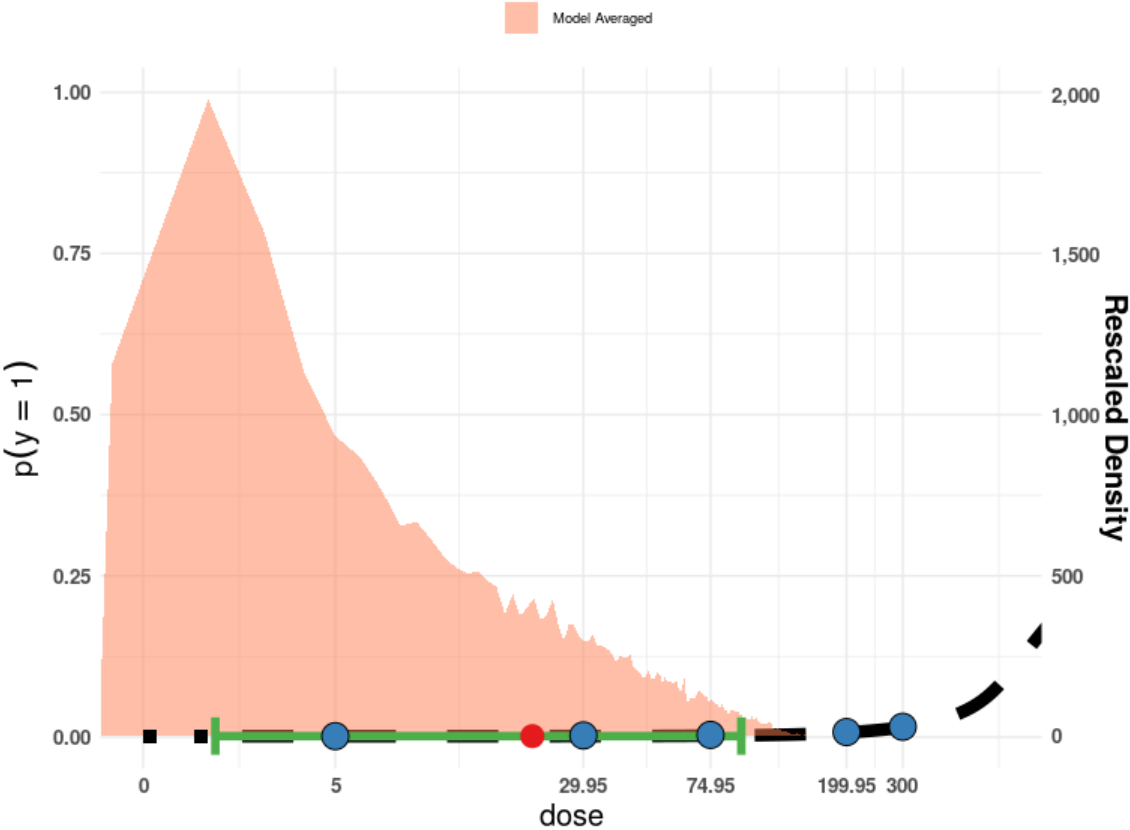

## Leonardi et al. (2012) skin cancer, relative BMR 5%

### Data Description

The endpoint to be analyzed is: Adj.cases for skin cancer

Data used for analysis:

| Water.conc.µg/L | Adj..cases | N     |
|-----------------|------------|-------|
| 0.340           | 59         | 4e+05 |
| 0.830           | 82         | 4e+05 |
| 3.990           | 70         | 4e+05 |
| 13.265          | 101        | 4e+05 |
| 93.415          | 179        | 4e+05 |

The 'Value for CES' is set to 7.38e-06.

Extended dose range is not applied.

Informative background prior: min: 0.000146025; the most likely: 0.0001475; max: 0.000148975. Shape parameter is applied.

The 'Sampling Method' is set to Bridge Sampling.

### Results

*Information pertaining to this endpoint.*

### Goodness of Fit

Best fitting model fits sufficiently well (Bayes factor is 2.74e-06).

### Model Averaged BMC

| Model          | Type | BMCL | BMC   | BMCU  |
|----------------|------|------|-------|-------|
| Model Averaged | BS   | 0.07 | 0.401 | 2.548 |

### Estimated BMCs per model

| Model | BMCL  | BMC    | BMCU   | Model Weights | Converged |
|-------|-------|--------|--------|---------------|-----------|
| E4_Q  | 0.082 | 0.376  | 1.622  | 0.337         | 1         |
| IE4_Q | 0.182 | 0.754  | 2.862  | 0.002         | 1         |
| H4_Q  | 0.081 | 0.383  | 1.567  | 0.333         | 1         |
| LN4_Q | 0.140 | 0.589  | 2.178  | 0.026         | 1         |
| G4_Q  | 9.361 | 23.916 | 58.347 | 0.000         | 0         |
| QE4_Q | 1.955 | 2.442  | 4.068  | 0.093         | 1         |
| P4_Q  | 0.040 | 0.249  | 1.327  | 0.110         | 1         |
| L4_Q  | 0.038 | 0.254  | 1.569  | 0.099         | 1         |

### Plots of Fitted Models

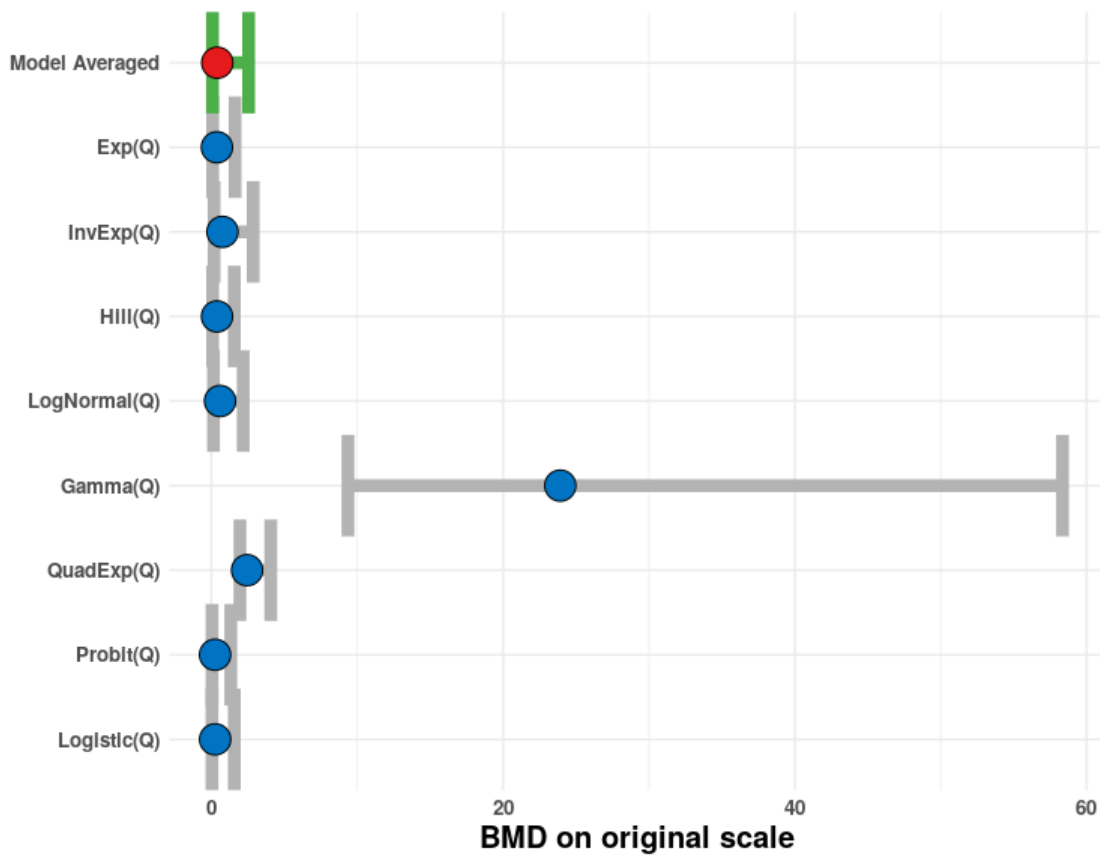

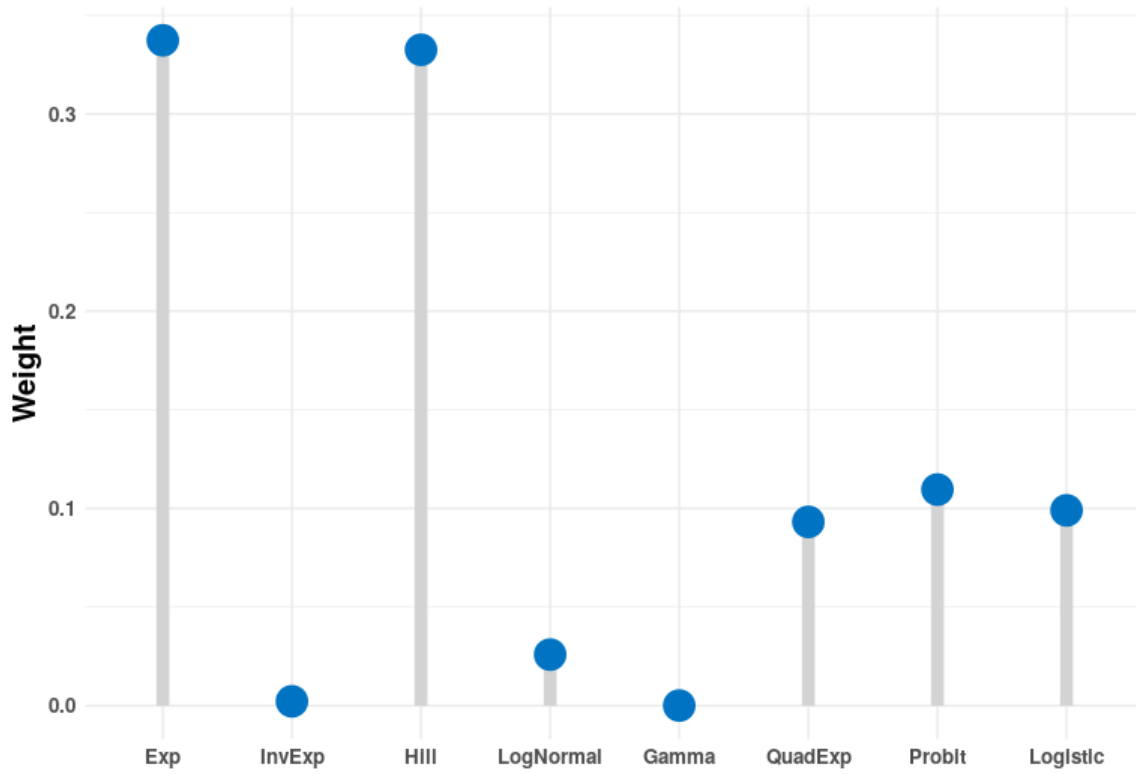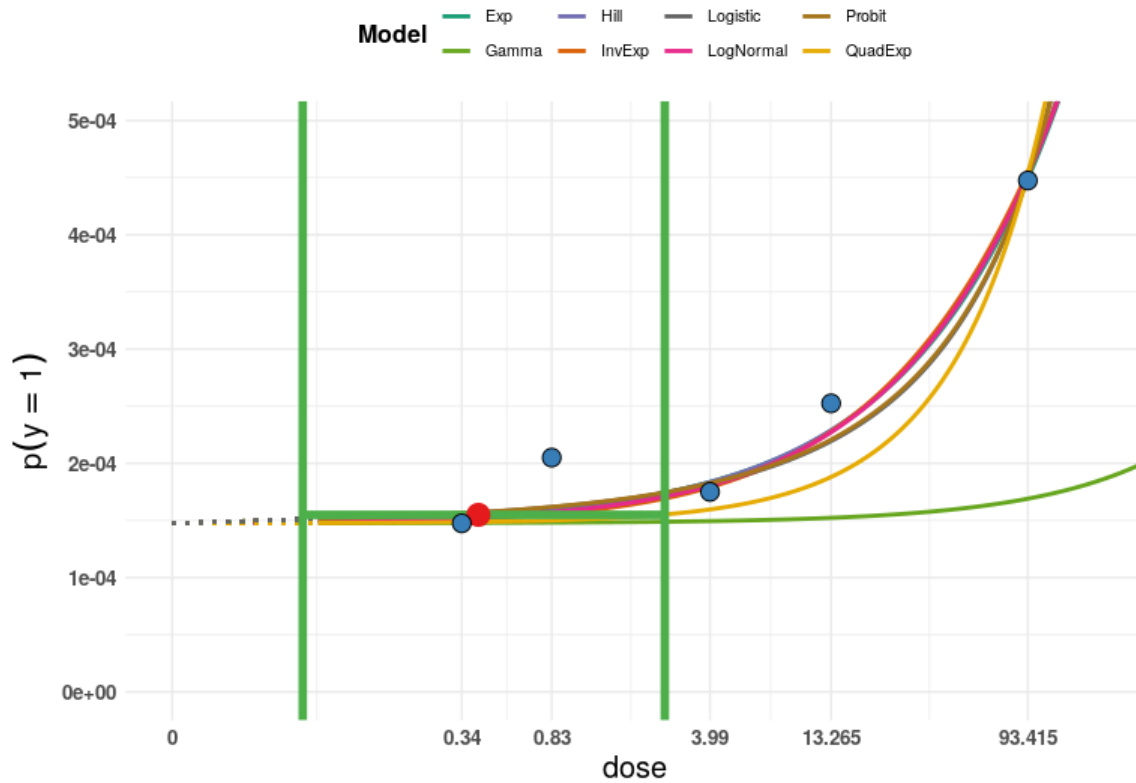

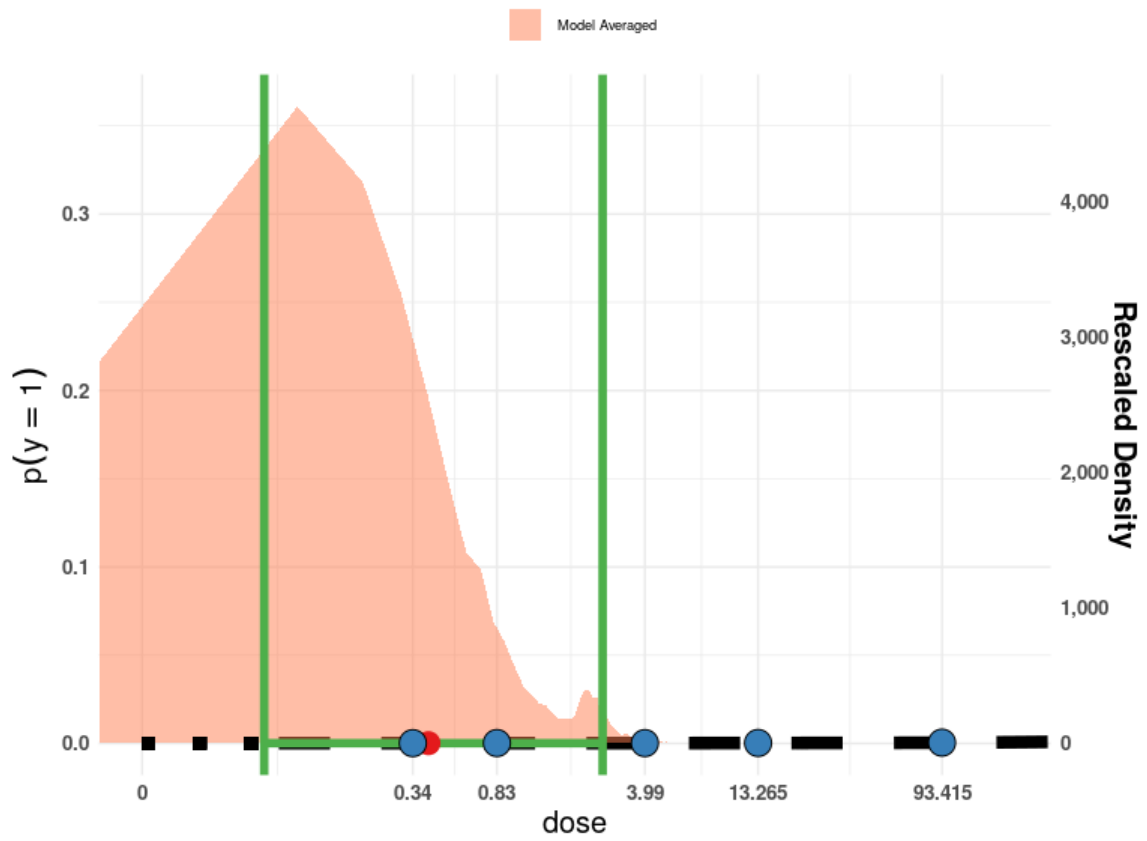



## Pierce et al. (2011) skin lesions, relative BMR 5%

### Data Description

The endpoint to be analyzed is: Adj.cases for skin lesions

Data used for analysis:

| Water.conc.µg/L | Adj..cases | N    |
|-----------------|------------|------|
| 5.05            | 117        | 2358 |
| 30.05           | 123        | 2118 |
| 75.05           | 145        | 1726 |
| 150.05          | 314        | 2855 |
| 200.10          | 115        | 617  |

The 'Value for CES' is set to 0.00261044.

Extended dose range is not applied.

Informative background prior: min: 0.049122137; the most likely: 0.049618321; max: 0.050114504. Shape parameter is applied.

The 'Sampling Method' is set to Bridge Sampling.

### Results

*Information pertaining to this endpoint.*

### Goodness of Fit

Best fitting model fits sufficiently well (Bayes factor is 5.60e-03).

### Model Averaged BMC

| Model          | Type | BMCL  | BMC    | BMCU   |
|----------------|------|-------|--------|--------|
| Model Averaged | BS   | 6.437 | 12.798 | 27.189 |

### Estimated BMCs per model

| Model | BMCL   | BMC    | BMCU   | Model Weights | Converged |
|-------|--------|--------|--------|---------------|-----------|
| E4_Q  | 8.161  | 17.135 | 31.143 | 0.090         | 1         |
| IE4_Q | 14.083 | 24.627 | 38.887 | 0.009         | 1         |
| H4_Q  | 8.458  | 17.205 | 31.132 | 0.080         | 1         |
| LN4_Q | 12.203 | 21.980 | 36.050 | 0.024         | 1         |
| G4_Q  | 8.738  | 17.570 | 31.624 | 0.096         | 1         |
| QE4_Q | 6.002  | 10.091 | 17.750 | 0.431         | 1         |
| P4_Q  | 6.811  | 14.560 | 26.818 | 0.129         | 1         |
| L4_Q  | 6.245  | 13.644 | 25.794 | 0.141         | 1         |

Plots of Fitted Models

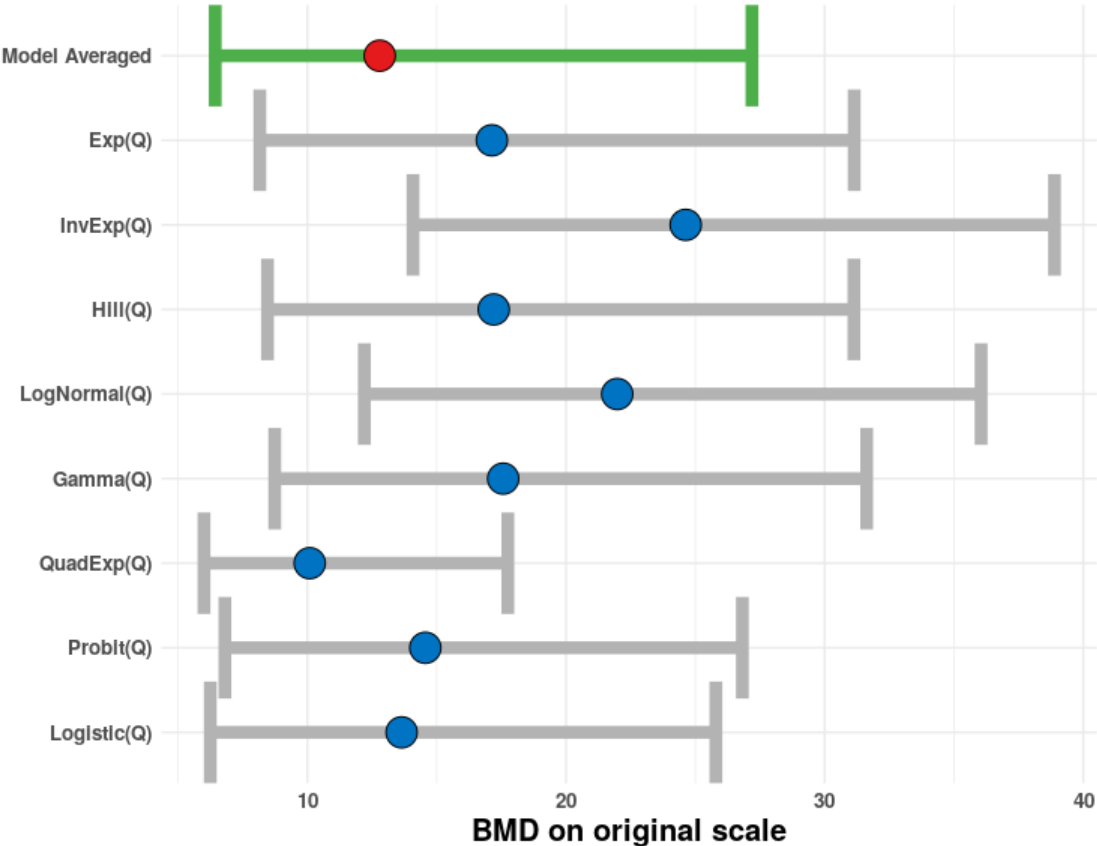

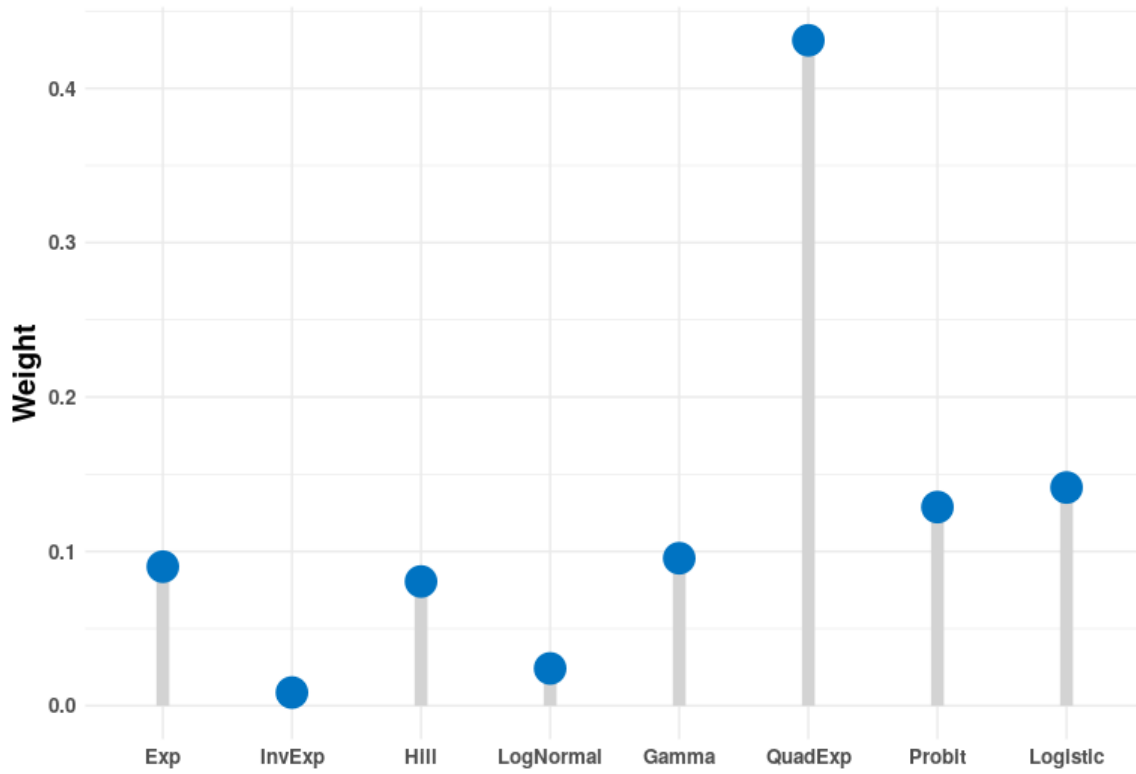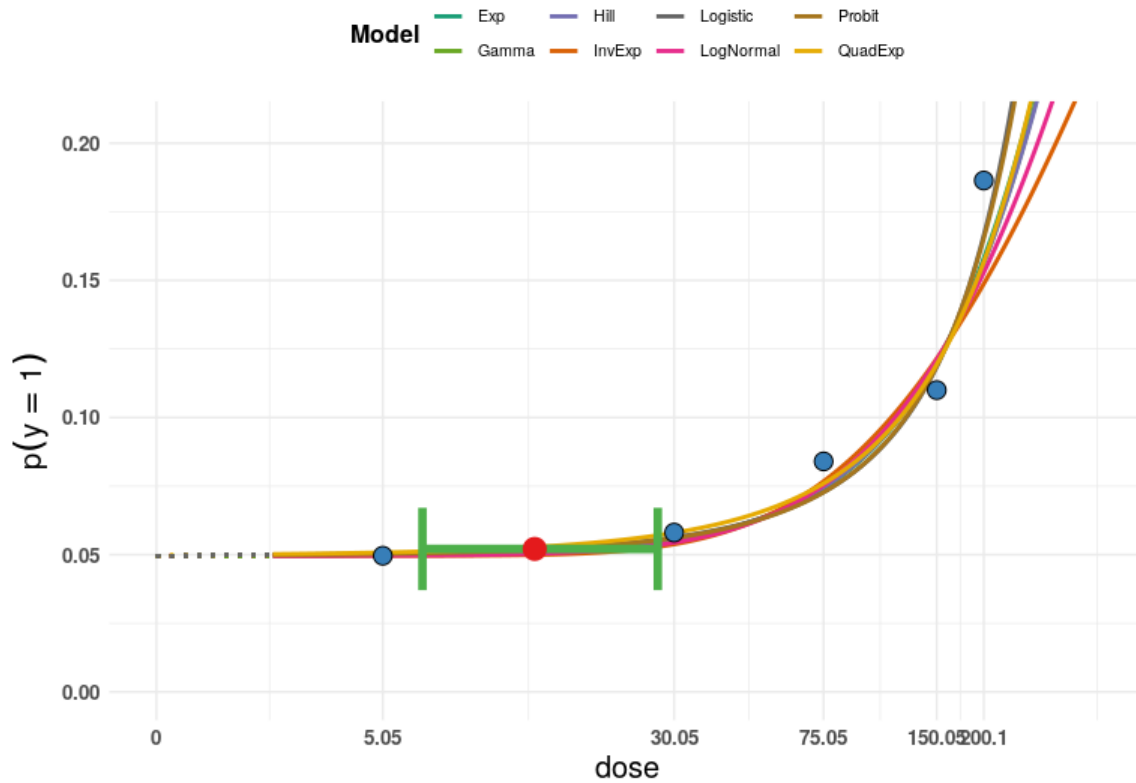

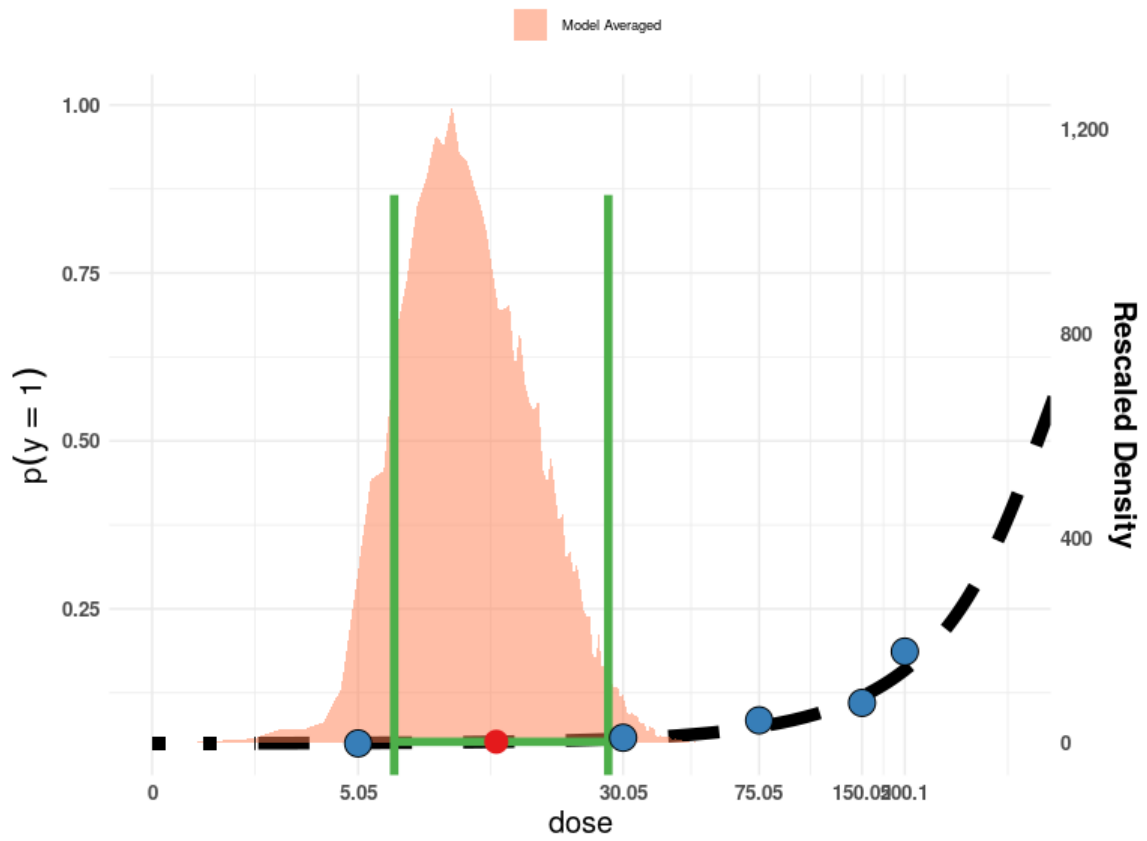

## Steinmaus et al. (2014a) lung cancer, relative BMR 5%

**Exposure: the highest 5-year average, based on arsenic daily intakes (the preferred exposure estimate for the study)**

### Data Description

The endpoint to be analyzed is: Adj.cases for lung cancer

Data used for analysis:

| Water.daily.intake.µg | Adj..cases | N     |
|-----------------------|------------|-------|
| 6.6                   | 25         | 79688 |
| 34.5                  | 30         | 77344 |
| 55.8                  | 37         | 67969 |

The 'Value for CES' is set to 1.569e-05.

Extended dose range is not applied.

Informative background prior: min: 0.000310586; the most likely: 0.000313724; max: 0.000316861. Shape parameter is applied.

The 'Sampling Method' is set to Bridge Sampling.

### Results

*Information pertaining to this endpoint.*

#### Goodness of Fit

Best fitting model fits sufficiently well (Bayes factor is 1.72e+00).

#### Model Averaged BMC

| Model          | Type | BMCL  | BMC    | BMCU   |
|----------------|------|-------|--------|--------|
| Model Averaged | BS   | 5.067 | 21.068 | 47.218 |

#### Estimated BMCs per model

| Model | BMCL   | BMC    | BMCU   | Model Weights | Converged |
|-------|--------|--------|--------|---------------|-----------|
| E4_Q  | 5.571  | 22.702 | 44.498 | 0.145         | 1         |
| IE4_Q | 21.457 | 44.523 | 52.618 | 0.044         | 1         |
| H4_Q  | 6.005  | 23.966 | 46.477 | 0.149         | 1         |
| LN4_Q | 14.752 | 35.518 | 50.627 | 0.089         | 1         |
| G4_Q  | 3.993  | 14.438 | 37.248 | 0.135         | 0         |
| QE4_Q | 4.434  | 10.637 | 35.900 | 0.179         | 1         |
| P4_Q  | 5.696  | 23.431 | 44.750 | 0.129         | 1         |
| L4_Q  | 6.101  | 23.629 | 42.994 | 0.130         | 1         |

**Plots of Fitted Models**

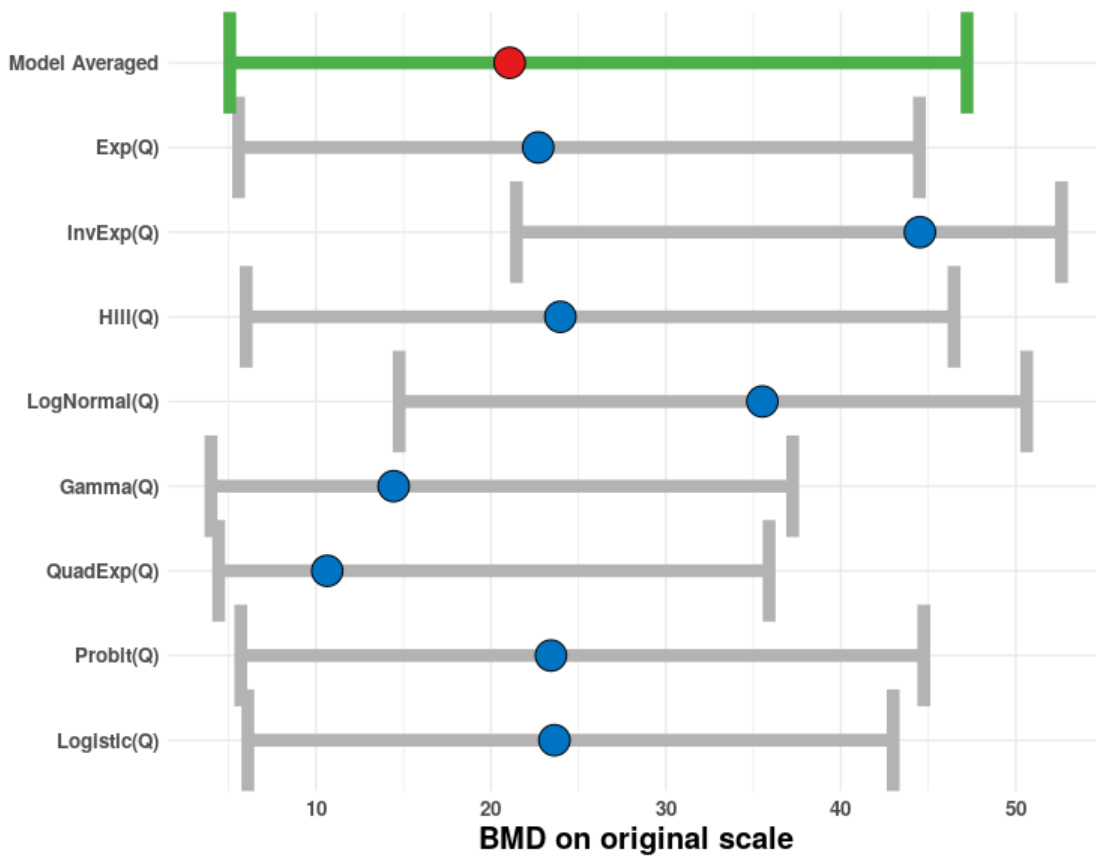

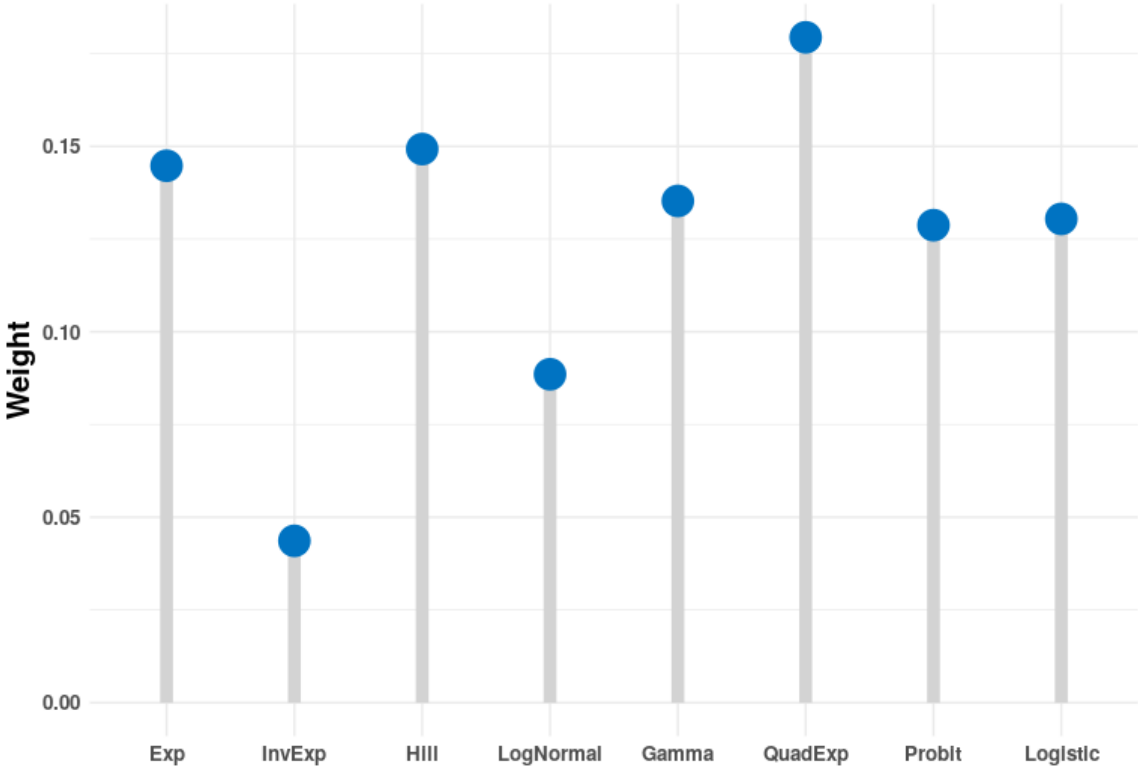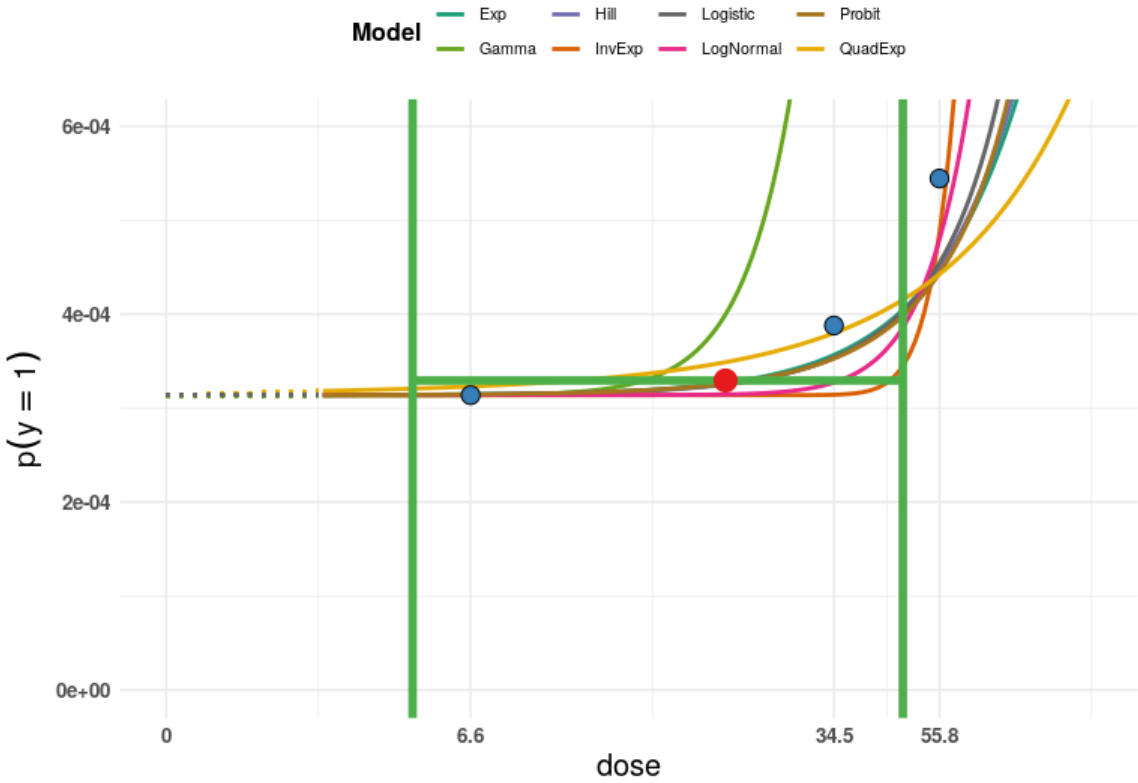

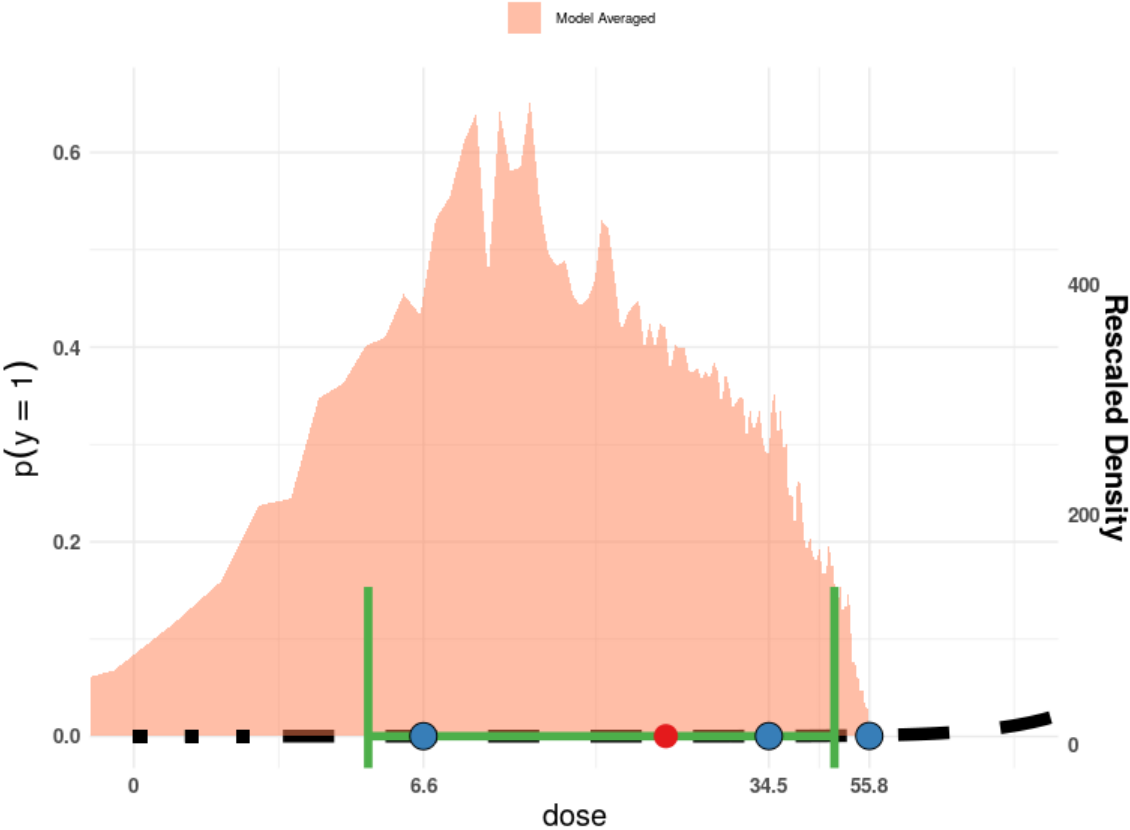



## References

- Chen CL, Chiou HY, Hsu LI, Hsueh YM, Wu MM and Chen CJ, 2010a. Ingested arsenic, characteristics of well water consumption and risk of different histological types of lung cancer in northeastern Taiwan. *Environ Res*, 110:455-462. doi: 10.1016/j.envres.2009.08.010
- Chen CL, Chiou HY, Hsu LI, Hsueh YM, Wu MM, Wang YH and Chen CJ, 2010b. Arsenic in drinking water and risk of urinary tract cancer: a follow-up study from northeastern Taiwan. *Cancer Epidemiol Biomarkers Prev*, 19:101-110. doi: 10.1158/1055-9965.Epi-09-0333
- EFSA Scientific Committee, More SJ, Bampidis V, Benford D, Bragard C, Halldorsson TI, Hernandez-Jerez AF, Bennekou SH, Koutsoumanis K, Lambr'e C, Machera K, Mennes W, Mullins E, Nielsen SS, Schrenk D, Turck D, Younes M, Aerts M, Edler L, Sand S, Wright M, Binaglia M, Bottex B, Cort'nas Abrahantes J and Schlatter J, 2022. Guidance on the use of the benchmark dose approach in risk assessment. *EFSA Journal* 2022;20(10):7584, 67 pp. <https://doi.org/10.2903/j.efsa.2022.7584>
- Leonardi G, Vahter M, Clemens F, Goessler W, Gurzau E, Hemminki K, Hough R, Koppova K, Kumar R, Rudnai P, Surdu S and Fletcher T, 2012. Inorganic arsenic and basal cell carcinoma in areas of Hungary, Romania, and Slovakia: a case-control study. *Environ Health Perspect*, 120:721-726. doi: 10.1289/ehp.1103534
- Pierce BL, Argos M, Chen Y, Melkonian S, Parvez F, Islam T, Ahmed A, Hasan R, Rathouz PJ, Ahsan H, 2011. Arsenic exposure, dietary patterns, and skin lesion risk in bangladesh: a prospective study. *Am J Epidemiol*, 173(3):345-54. doi: 10.1093/aje/kwq366.
- Steinmaus C, Ferreccio C, Yuan Y, Acevedo J, González F, Perez L, Cortés S, Balmes JR, Liaw J, Smith AH, 2014a. Elevated lung cancer in younger adults and low concentrations of arsenic in water. *Am J Epidemiol*, 180(11):1082-7. doi: 10.1093/aje/kwu238

**Appendix**

Using water iAs concentrations (rather than total exposures) as a basis for modelling creates a dose-response shape that differs somewhat due to differences in relative dose spacing as illustrated for Pierce et al. (2011).

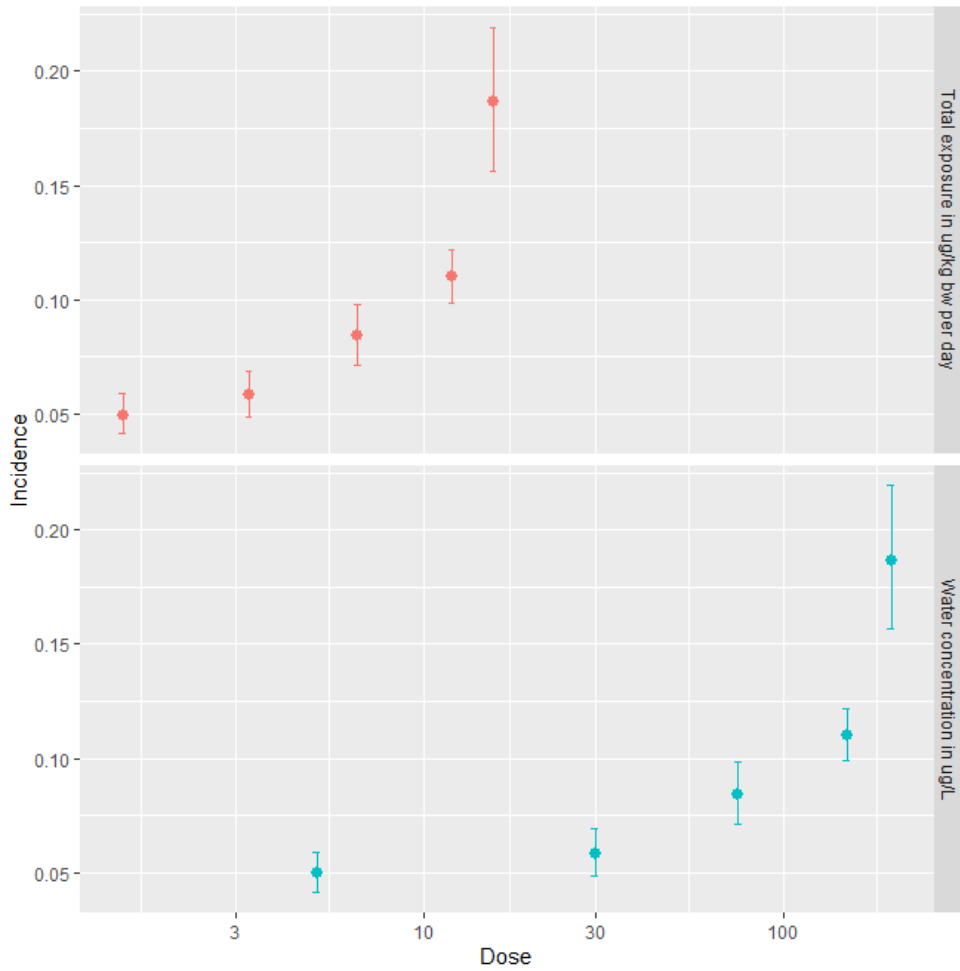

Supplement: EFS2-22-e8488-s003.pdf [file EFS2-22-e8488-s003.pdf]
