# Supplementary material for: Update of the risk assessment of inorganic arsenic in food
Source: PubMed Central journal article supplement (PMC10794945; doi:10.2903/j.efsa.2024.8488), 2024-01-18
Supplement: EFS2-22-e8488-s002.pdf [file EFS2-22-e8488-s002.pdf]

Annex to: Update of the risk assessment of inorganic arsenic in food.  
doi:10.2903/j.efsa.2024.8488

© European Food Safety Authority, 2024

## Annex B Literature searches

### B.1. Comprehensive literature search, 14<sup>th</sup> April 2021

#### Search terms for relevant compounds, synonyms and their abbreviations

##### Controlled vocabulary [Mesh]

"Arsenic"[Mesh]  
 "arsenite" [Supplementary Concept]  
 "Arsenites"[Mesh]  
 "Cacodylic Acid"[Mesh]  
 "dimethylarsinous acid" [Supplementary Concept]  
 "monomethylarsonic acid" [Supplementary Concept]  
 "methylarsonite" [Supplementary Concept]  
 "thio-dimethylarsinate" [Supplementary Concept]  
 7440-38-2[rn]  
 15584-04-0[rn]  
 15132-04-4[rn]  
 51952-65-9[rn]  
 25400-23-1[rn]

##### Free-text term

arsenic  
 arsenate  
 arsenite  
 "as III"  
 "as V"  
 asiii  
 asV  
 iAs  
 Dimethylarsinate  
 Dimethylarsinite  
 Methylarsonate  
 Methylarsonite  
 Thio-dimethylarsinate  
 "DMA III"  
 dmaIII  
 "Thio DMA"  
 "Dimethyl arsenic acid"  
 "Methyl arsenic acid"  
 "MA III"  
 MAIII  
 dimethylarsinous acid  
 monomethylarsonic acid  
 7440-38-2  
 15584-04-0  
 15132-04-4  
 51952-65-9  
 25400-23-1

## Search terms toxicokinetics

### Controlled vocabulary [Mesh]

"Biological Transport"[Mesh]  
 "Pharmacokinetics"[Mesh]  
 "Toxicokinetics"[Mesh]  
 "pharmacokinetics" [Subheading]  
 "metabolism"[Subheading]

### Free-text term

ADME  
 accumulat\*  
 bioavail\*  
 bioconcentr\*  
 biodistribut\*  
 "biologic avail\*"  
 biotrans\*  
 clearance\*  
 degrad\*  
 detox\*  
 distribut\*  
 dosim\*  
 eliminat\*  
 excret\*  
 kinetic\*  
 metaboli\*  
 "mode of action"  
 "mechanism of action"  
 pharmacokinetic\*  
 PBPK  
 "pb pk"  
 PBTk  
 "pb tk"  
 "pk model\*"  
 "tk model\*"  
 Reabsor\*  
 Retain\*  
 Retention\*  
 secrete\*  
 secretion\*  
 toxicokinetic\*  
 transport\*  
 uptake\*  
 urinat\*  
 ((absorb  
 absorbs  
 absorbed  
 absorption\*  
 deposit)\* NOT (atomic  
 optical  
 spectra\*  
 spectros\*  
 spectrum\*  
 infrared)

## Search terms toxicity

### Controlled vocabulary (Mesh)

"Toxic Actions"[Mesh]  
 "toxicity" [Subheading]  
 "Toxicity Tests"[Mesh]  
 "Toxicological Phenomena"[Mesh]  
 "Toxicology"[Mesh]  
 "adverse effects" [Subheading]  
 "chemically induced" [Subheading]  
 "Death"[Mesh]  
 "Mortality"[Mesh]  
 "drug effects" [Subheading]  
 "Chemically-Induced Disorders"[Mesh:noexp]  
 "Drug-Related Side Effects and Adverse Reactions"[Mesh:noexp]  
 "Long Term Adverse Effects"[Mesh]  
 "Substance-Related Disorders"[Mesh:noexp]  
 "Neurotoxins"[Mesh]  
 "Nervous System Diseases"[Mesh]  
 "Brain"[Mesh]  
 "Neuroanatomy"[Mesh]  
 "Nervous System"[Mesh]  
 "Nervous System Diseases"[Mesh]  
 "Neuropathology"[Mesh]  
 "Neurologic Manifestations"[Mesh]  
 "Neurotoxicity Syndromes"[Mesh]  
 "Neurologic Manifestations"[Mesh]  
 "Carcinogens"[Mesh:noExp]  
 "Carcinogens" [Pharmacological Action]  
 "Carcinogenicity Tests"[Mesh]  
 "Biomarkers, Tumor"[Mesh]  
 "Lymphoma"[Mesh]  
 "Neoplasms"[Mesh]  
 "Cell Growth Processes"[Mesh]  
 "Allergy and Immunology"[Mesh]  
 "Immune System"[Mesh]  
 "Immunotoxins"[Mesh]  
 "Lymph Nodes"[Mesh]  
 "Lymphoid tissue"[Mesh]  
 "Spleen"[Mesh]  
 "Thymus Gland"[Mesh]  
 "Cardiotoxins"[Mesh]  
 "Cardiovascular Diseases"[Mesh]  
 "Chemical and Drug Induced Liver Injury"[Mesh]  
 "Heart"[Mesh]  
 "Kidney"[Mesh]  
 "Kidney Diseases"[Mesh]  
 "Liver"[Mesh]  
 "Liver Diseases"[Mesh]  
 "Lung"[Mesh]

### Free-text search terms

"dose response"  
 "dose effect\*"  
 Hypertoxic\*  
 intoxic\*  
 lethal\*  
 "No Observed Adverse Effect Level"  
 "No Observed Adverse Effect Levels"  
 "No Observed Effect Level"  
 "No Observed Effect Levels"  
 "No Observable Adverse Effect Level"  
 "No Observable Adverse Effect Levels"  
 "No Observable Effect Level"  
 "No Observable Effect Levels"  
 NOAEL  
 NOAELs  
 NOEL  
 NOELs  
 Toxic\*  
 Brain  
 Brains  
 Cerebellum  
 Cortex  
 Hippocamp\*  
 Neurobehav\*  
 ((neurologic OR nervous) AND (disease\* OR disorder\* OR dysfunction\* OR manifestation\*))  
 "nervous system\*"  
 Neuroanatom\*  
 neurocognit\*  
 neurolog\*  
 neuropath\*  
 Neurotoxi\*  
 Adenocar\*  
 Cancer\*  
 Carcino\*  
 "Cell grow\*"  
 Cocarcino\*  
 Lymphom\*  
 Neoplas\*  
 Tumor\*  
 Tumour\*  
 Allerg\*  
 Immunol\*  
 Immunotox\*  
 "Immune system"  
 Lymph node\*  
 Lymphatic node\*  
 Lymphoid tissue\*  
 Lymphatic tissue\*  
 Macrophage\*

"Lung Diseases"[Mesh]  
 "Urinary Bladder"[Mesh]  
 "Urinary Tract"[Mesh]  
 "abnormalities" [Subheading]  
 "Abortion, Spontaneous"[Mesh]  
 "Congenital, Hereditary, and Neonatal Diseases and Abnormalities"[Mesh]  
 "Congenital Abnormalities"[Mesh]  
 "Embryonic Structures"[Mesh]  
 "Fetus"[Mesh]  
 "Genital Diseases, Female"[Mesh]  
 "Genital Diseases, Male"[Mesh]  
 "Maternal-Fetal Relations"[Mesh]  
 "Pregnancy"[Mesh]  
 "Pregnancy Complications"[Mesh:noexp]  
 "Prenatal Injuries"[Mesh]  
 "Prenatal Exposure Delayed Effects"[Mesh]  
 "Reproduction"[Mesh:noexp]  
 "Reproductive Physiological Phenomena"[Mesh]  
 "Spermatozoa"[Mesh]  
 "Spermatogenesis"[Mesh]  
 "Sperm Count"[Mesh]  
 "Teratogenesis"[Mesh]  
 "Teratogens"[Mesh]  
 "Teratogens" [Pharmacological Action]  
 "Teratology"[Mesh]  
 "Urogenital System"[Mesh]  
 "Uterus"[Mesh]  
 "Growth and Development"[Mesh]  
 "Behavior"[Mesh:noExp]  
 "Behavior, Animal"[Mesh]  
 "Behavioral Symptoms"[Mesh]  
 "Cognition"[Mesh]  
 "Cognition Disorders"[Mesh]  
 "Cognitive Dysfunction"[Mesh]  
 "Depression"  
 "Developmental Biology"[Mesh]  
 "Embryonic and Fetal Development"[Mesh]  
 "Executive Function"[Mesh]  
 "Intelligence"[Mesh:NoExp]  
 "Learning"[Mesh]  
 "Memory"[Mesh]  
 "Motor Activity"[Mesh]  
 "Motor Skills"[Mesh]  
 "Morphogenesis"[Mesh]  
 "Neuropathology"[Mesh]  
 "Neurocognitive Disorders"[Mesh]  
 "Neuropsychological Tests"[Mesh]  
 "Psychomotor Disorders"[Mesh]  
 "Psychomotor Performance"[Mesh]  
 "Skin"[Mesh]  
 "Skin Diseases"[Mesh]  
 "adverse effects" [Subheading]  
 "chemically induced" [Subheading]  
 "Death"[Mesh]  
 Peyer's patch\*  
 Peyer patch\*  
 sensitisation  
 sensitization  
 Spleen\*  
 Thymic  
 Thymus  
 Bladder  
 Cardiotox\*  
 Cardiomiopath\*  
 Coronary  
 Heart  
 Hepati\*  
 Hepato\*  
 Kidney\*  
 Liver  
 Lung  
 Lungs  
 Myocardit\*  
 Nephropath\*  
 Nephrotox\*  
 Pericardit\*  
 Pulmonar  
 Renal disease  
 Renal disorder  
 Renal injur\*  
 Abortion\*  
 Abortiv\*  
 Abnormalit\*  
 Congeni\*  
 Embryo\*  
 Fetal  
 Foetal  
 Fertility  
 Fetotoxic\*  
 Foetotoxic\*  
 Fetus  
 Fetuses  
 Foetus  
 Foetuses  
 Genital disease\*  
 Gestation\*  
 "In utero"  
 Infertility  
 Malformat\*  
 Miscarriage\*  
 Ovary  
 Ovari\*  
 Pregnan\*  
 "Prenatal disorder\*"  
 "Prenatal exposure\*"  
 "Prenatal structure\*"  
 Perinatal  
 Postnatal  
 Reproducti\*  
 Reprotox\*

"Mortality"[Mesh]  
 "drug effects" [Subheading]  
 "Chemically-Induced Disorders"[Mesh:noexp]  
 "Drug-Related Side Effects and Adverse Reactions"[Mesh:noexp]  
 "Long Term Adverse Effects"[Mesh]  
 "Substance-Related Disorders"[Mesh:noexp]  
 "Diabetes Mellitus"[Mesh]  
 "Glucose/metabolism"[Mesh]  
 "Glucose Metabolism Disorders"[Mesh:NoExp]

Sterility  
 Sperm\*  
 Teratogen\*  
 Testes  
 Testis  
 Testicle\*  
 Testicular\*  
 Thyroid\*  
 Thyrotox\*  
 Urogenital disease\*  
 Uterus  
 Skin  
 dermal  
 Development\*  
 "behavioural"  
 "behavioral"  
 Behaviour\*  
 Behavior\*  
 Cognition\*  
 Cognitiv\*  
 Comprehensi\*  
 Depressi\*  
 DNT  
 developmental  
 Development\*  
 (Executive AND (control OR function\* OR dysfunction\* OR impair\*))  
 intelligence  
 Learning  
 Locomotor\*  
 (memor\* AND (disorder\*OR dysfunction\* OR impair\*))  
 metamemory\*  
 Ontogen\*  
 Organogene\*  
 Neurocognitive\*  
 Neuropsycholog\*  
 neurodevelopment\*  
 placental barrier\*  
 "adverse effect\*"  
 "adverse health effect\*"  
 "adverse reaction"  
 Death\*  
 Dead  
 "Fatal outcome"  
 Mortalit\*  
 Diabet\*  
 Glucose homeostases  
 Glucose homeostasis  
 "Glucose metabolism

## Search terms cytotoxicity and genotoxicity

### Controlled vocabulary

"Cell Survival"[Mesh]  
 "Cytotoxins"[Mesh]  
 "Endocrine disruptors"[Mesh]  
 "Hormones"[Mesh]  
 "Macrophages"[Mesh]  
 "Aneugens"[Mesh]  
 "Aneuploidy"[Mesh]  
 "apoptosis"[Mesh]  
 "Chromatids"[Mesh]  
 "Chromosomes"[Mesh]  
 "Chromosome Aberrations"[Mesh]  
 "DNA Damage"[Mesh]  
 "DNA Repair"[Mesh]  
 "Mutagenicity Tests"[Mesh]  
 "Mutagens" [Pharmacological Action]  
 "Mutagens"[Mesh]  
 "Mutagenesis"[Mesh]  
 "Oxidative Stress"[Mesh]

### Free-text terms

Cell impairment\*  
 Cells impairment\*  
 Cell toxicity  
 Cells toxicity  
 Cell prolifer\*  
 Cells prolifer\*  
 Cell survival  
 Cells survival  
 cytotox\*  
 Endocrine disruptor\*  
 Hormon\*  
 Estrogen\*  
 Oestrogen\*  
 Androgen\*  
 Apoptoses  
 Apoptosis  
 Aneugen\*  
 Aneuploid\*  
 Chromatid\*  
 Chromosome\*  
 Clastogen\*  
 "DNA binding"  
 DNA fragment\*  
 DNA damage\*  
 "DNA lesion"  
 "DNA lesions"  
 "DNA repair\*"  
 genotox\*  
 mutagen\*  
 Mutat\*  
 oxidative stress\*

## Search terms In vitro toxicity

### Controlled vocabulary

"In Vitro Techniques"[Mesh]  
 "Caco-2 Cells"[Mesh]  
 "Cells, Cultured"[Mesh]  
 "Culture Media"[Mesh]  
 "Lysosomes"[Mesh]  
 "Hypoxanthine  
 Phosphoribosyltransferase"[Mesh]  
 "Autopsy"[Mesh]  
 "Micronucleus Tests"[Mesh]  
 "Pathology"[Mesh]

### Free-text terms

Autops\*  
 histopath\*  
 "in vivo"  
 "in vitro"  
 GALT  
 3T3  
 A549  
 "BEAS 2B"  
 Caco 2 cell\*  
 CHO cell\*  
 HELA  
 HEpG2  
 HepaRG  
 Jurkat

"MCF 7"  
 "cell line"  
 "cell lines"  
 "cell culture"  
 Colonic Epithelial Cell\*  
 Colorectal epithelial cell\*  
 Comet assay\*  
 HPRT  
 "Hypoxanthine  
 Phosphoribosyltransferase"  
 "hypoxanthin phosphoribosyl  
 transferase"  
 Lysosom\*  
 "M cell"  
 "M cells"  
 "Microfold cell"  
 "Microfold cells"  
 Micronucleus assay\*  
 Micronucleus test\*  
 "read across"  
 SCGE assay\*  
 single-cell gel electrophoresis assay\*  
 Tissue\*  
 "xanthine guanine phosphoribosyl  
 transferase"  
 "xanthine guanine  
 phosphoribosyltransferase"  
 Xprt

## Search terms epidemiologic studies

### Controlled vocabulary

"Epidemiologic Research Design"[Mesh]  
 "Epidemiologic Studies"[Mesh]  
 "epidemiology" [Subheading]  
 "Clinical Study" [Publication Type]  
 "Case Reports" [Publication Type]  
 "Randomized Controlled Trial" [Publication  
 Type]  
 "Meta-Analysis" [Publication Type]  
 "Biomarkers"[Mesh]  
 "Biological Monitoring"[Mesh]

### Free-text terms

"case control\*"  
 Case history\*  
 "case report"  
 "case reports"  
 Case stud\*  
 Case serie\*  
 "clinical trial\*"  
 cohort  
 cohorts  
 "cross sectional"  
 Epidemiol\*  
 "follow-up study"  
 Longitudinal  
 Observational  
 prospective  
 "randomized control trial\*"  
 Retrospective  
 Metaanalys\*  
 "meta analys\*"  
 Biomarker\*  
 Biochemical marker\*

Biologic marker\*  
 Biological marker\*  
 Clinical marker\*  
 Laboratory marker\*  
 BiomonitoringBio monitoring  
 Biologic monitoring  
 Biological monitoring

## Search terms Animal experiments

### Controlled vocabulary

"Animal Experimentation"[Mesh]  
 "Guinea Pigs"[Mesh]  
 "Muridae"[Mesh]  
 "Rodentia"[Mesh:NoExp]  
 "Cats"[Mesh]  
 "Dogs"[Mesh]  
 "Mink"[Mesh]  
 "Swine"[Mesh]  
 "Primates"[Mesh:NoExp]

### Free-text terms

Cavia  
 Cricetinae  
 Cricetus  
 "guinea pig"  
 "guinea pigs"  
 Hamster\*  
 Mice  
 Mouse  
 Muridae  
 Murinae  
 Murine  
 Mus  
 Rat  
 Rats  
 Rattus  
 Rodent\*  
 Felis  
 Cat  
 Cats  
 Catus  
 Dog  
 Dogs  
 Canine\*  
 Canis  
 Mink  
 Minks  
 Mustela\*  
 Pig  
 Pigs  
 Swine  
 Piglet\*  
 Monkey  
 Monkeys  
 Nomascus  
 Primate\*



## Search terms human data

### Controlled vocabulary

"Age Groups"[Mesh]  
 "Human Experimentation"[Mesh]  
 "Humans"[Mesh]  
 "Patients"[Mesh]  
 "Patient Participation"[Mesh]  
 "Research Subjects"[Mesh]

### Free-text terms

Aged  
 Baby  
 Babies  
 Boy  
 Boys  
 Boyhood  
 Centenarian\*  
 Child\*  
 Citizen\*  
 Client\*  
 Elder\*  
 Girl  
 Girls  
 Girlhood  
 Human\*  
 Inpatient\*  
 Kindergarten\*  
 Man  
 Men  
 "middle age"  
 Newborn\*  
 "new born\*"  
 Nonagenarian\*  
 Octogenarian\*  
 Outpatient\*  
 Participant\*  
 Patient\*  
 Pediatric\*  
 Paediatric\*  
 Person\*  
 People  
 Preschool\*  
 Retiree\*  
 "Research subject"  
 "pre school"  
 Septuagenarian\*  
 Schoolchild\*  
 Seniors  
 Sexagenarian\*  
 Student\*  
 Teen  
 Teenager\*  
 Teens  
 Toddler\*  
 Volunteer\*  
 Woman  
 Women  
 Youngster\*

## Queries

| Set  | Query Web of Science                                                                                                                                                                                                                                                                                                                                                                                                                                                                                                                                                                                                                                                                                                                                                                                                                                                                                                      | Results          | Comments                                                                    |
|------|---------------------------------------------------------------------------------------------------------------------------------------------------------------------------------------------------------------------------------------------------------------------------------------------------------------------------------------------------------------------------------------------------------------------------------------------------------------------------------------------------------------------------------------------------------------------------------------------------------------------------------------------------------------------------------------------------------------------------------------------------------------------------------------------------------------------------------------------------------------------------------------------------------------------------|------------------|-----------------------------------------------------------------------------|
| # 16 | (#10 AND #2 AND #1) AND LANGUAGE: (English) AND DOCUMENT TYPES: (Review) Indexes=SCI-EXPANDED, ESCI, CCR-EXPANDED, IC Timespan=2010-2021                                                                                                                                                                                                                                                                                                                                                                                                                                                                                                                                                                                                                                                                                                                                                                                  | <u>434</u>       | ADME reviews<br>ADME AND Arsenic AND (Humans OR Animals) AND Reviews        |
| # 15 | (#14 OR #13) AND LANGUAGE: (English) Indexes=SCI-EXPANDED, ESCI, CCR-EXPANDED, IC Timespan=2010-2021                                                                                                                                                                                                                                                                                                                                                                                                                                                                                                                                                                                                                                                                                                                                                                                                                      | <u>3,430</u>     | Toxicity Animals OR Genotoxicity                                            |
| # 14 | #8 AND #3 AND #1<br>Indexes=SCI-EXPANDED, ESCI, CCR-EXPANDED, IC Timespan=2010-2021                                                                                                                                                                                                                                                                                                                                                                                                                                                                                                                                                                                                                                                                                                                                                                                                                                       | <u>2,195</u>     | Toxicity Animals:<br>Toxicity AND Animals AND Arsenic                       |
| # 13 | #12 AND #4 AND #1<br>Indexes=SCI-EXPANDED, ESCI, CCR-EXPANDED, IC Timespan=2010-2021                                                                                                                                                                                                                                                                                                                                                                                                                                                                                                                                                                                                                                                                                                                                                                                                                                      | <u>2,352</u>     | Genotoxicity:<br>Genotoxicity AND (Animals OR In vitro/In vivo) AND Arsenic |
| # 12 | #8 OR #5<br>Indexes=SCI-EXPANDED, ESCI, CCR-EXPANDED, IC Timespan=2010-2021                                                                                                                                                                                                                                                                                                                                                                                                                                                                                                                                                                                                                                                                                                                                                                                                                                               | <u>2,847,778</u> | (Animals OR In vitro/In vivo)                                               |
| # 11 | #10 AND #2 AND #1<br>Indexes=SCI-EXPANDED, ESCI, CCR-EXPANDED, IC Timespan=2010-2021                                                                                                                                                                                                                                                                                                                                                                                                                                                                                                                                                                                                                                                                                                                                                                                                                                      | <u>5,059</u>     | ADME AND Arsenic AND (Humans OR Animals)                                    |
| # 10 | #8 OR #7<br>Indexes=SCI-EXPANDED, ESCI, CCR-EXPANDED, IC Timespan=2010-2021                                                                                                                                                                                                                                                                                                                                                                                                                                                                                                                                                                                                                                                                                                                                                                                                                                               | <u>8,264,675</u> | (Humans OR Animals)                                                         |
| # 9  | (#7 AND #6 AND #1) AND LANGUAGE: (English)<br>Indexes=SCI-EXPANDED, ESCI, CCR-EXPANDED, IC Timespan=2010-2021                                                                                                                                                                                                                                                                                                                                                                                                                                                                                                                                                                                                                                                                                                                                                                                                             | 2,822            | Human studies:<br>Humans AND Epidemiological studies AND Arsenic            |
| # 8  | (TI=(Cavia OR Cricetinae OR Cricetus OR "guinea pig" OR "guinea pigs" OR Hamster* OR Mice OR Mouse OR Muridae OR Murinae OR Murine OR Mus OR Rat OR Rats OR Rattus OR Rodent* OR Felis OR Cat OR Cats OR Catus OR Dog OR Dogs OR Canine* OR Canis OR Mink OR Minks OR Mustela* OR Pig OR Pigs OR Swine OR Piglet* OR Monkey OR Monkeys OR Nomascus OR primate*) OR AB=(Cavia OR Cricetinae OR Cricetus OR "guinea pig" OR "guinea pigs" OR Hamster* OR Mice OR Mouse OR Muridae OR Murinae OR Murine OR Mus OR Rat OR Rats OR Rattus OR Rodent* OR Felis OR Cat OR Cats OR Catus OR Dog OR Dogs OR Canine* OR Canis OR Mink OR Minks OR Mustela* OR Pig OR Pigs OR Swine OR Piglet* OR Monkey OR Monkeys OR Nomascus OR primate*) OR AK=(Cavia OR Cricetinae OR Cricetus OR "guinea pig" OR "guinea pigs" OR Hamster* OR Mice OR Mouse OR Muridae OR Murinae OR Murine OR Mus OR Rat OR Rats OR Rattus OR Rodent* OR Feli | <u>1,363,076</u> | Animals<br>(experimental)                                                   |

| Set | Query Web of Science                                                                                                                                                                                                                                                                                                                                                                                                                                                                                                                                                                                                                                                                                                                                                                                                                                                                                                                                                                                                                                                                                                                                                                                                                                                                                                                                                                                                                                                                                                                                                                                                                                                                                                                                                                                                                                                                                                                                                                                                                                                                                                                                                                                                                                          | Results          | Comments |
|-----|---------------------------------------------------------------------------------------------------------------------------------------------------------------------------------------------------------------------------------------------------------------------------------------------------------------------------------------------------------------------------------------------------------------------------------------------------------------------------------------------------------------------------------------------------------------------------------------------------------------------------------------------------------------------------------------------------------------------------------------------------------------------------------------------------------------------------------------------------------------------------------------------------------------------------------------------------------------------------------------------------------------------------------------------------------------------------------------------------------------------------------------------------------------------------------------------------------------------------------------------------------------------------------------------------------------------------------------------------------------------------------------------------------------------------------------------------------------------------------------------------------------------------------------------------------------------------------------------------------------------------------------------------------------------------------------------------------------------------------------------------------------------------------------------------------------------------------------------------------------------------------------------------------------------------------------------------------------------------------------------------------------------------------------------------------------------------------------------------------------------------------------------------------------------------------------------------------------------------------------------------------------|------------------|----------|
| # 7 | <p>s OR Cat OR Cats OR Catus OR Dog OR Dogs OR Canine* OR Canis OR Mink OR Minks OR Mustela* OR Pig OR Pigs OR Swine OR Piglet* OR Monkey OR Monkeys OR Nomascus OR primate*) AND LANGUAGE: (English)<br/> <i>Indexes=SCI-EXPANDED, ESCI, CCR-EXPANDED, IC Timespan=2010-2021</i></p> <p>(TI=(Aged OR Baby OR Babies OR Boy OR Boys OR Boyhood OR Centenarian* OR Child* OR Citizen* OR Client* OR Elder* OR Girl OR Girls OR Girlhood OR Human* OR Inpatient* OR Kindergarten* OR Man OR Men OR "middle age" OR Newborn* OR "new born*" OR Nonagenarian* OR Octogenarian* OR Outpatient* OR Participant* OR Patient* OR Pediatric* OR Paediatric* OR Person* OR People OR Preschool* OR Retiree* OR "Research subject" OR "pre school" OR Septuagenarian* OR Schoolchild* OR Seniors OR Sexagenarian* OR Student* OR Teen OR Teenager* OR Teens OR Toddler* OR Volunteer* OR Woman OR Women OR Youngster* OR Youth* OR AB=(Aged OR Baby OR Babies OR Boy OR Boys OR Boyhood OR Centenarian* OR Child* OR Citizen* OR Client* OR Elder* OR Girl OR Girls OR Girlhood OR Human* OR Inpatient* OR Kindergarten* OR Man OR Men OR "middle age" OR Newborn* OR "new born*" OR Nonagenarian* OR Octogenarian* OR Outpatient* OR Participant* OR Patient* OR Pediatric* OR Paediatric* OR Person* OR People OR Preschool* OR Retiree* OR "Research subject" OR "pre school" OR Septuagenarian* OR Schoolchild* OR Seniors OR Sexagenarian* OR Student* OR Teen OR Teenager* OR Teens OR Toddler* OR Volunteer* OR Woman OR Women OR Youngster* OR Youth* ) OR AK=(Aged OR Baby OR Babies OR Boy OR Boys OR Boyhood OR Centenarian* OR Child* OR Citizen* OR Client* OR Elder* OR Girl OR Girls OR Girlhood OR Human* OR Inpatient* OR Kindergarten* OR Man OR Men OR "middle age" OR Newborn* OR "new born*" OR Nonagenarian* OR Octogenarian* OR Outpatient* OR Participant* OR Patient* OR Pediatric* OR Paediatric* OR Person* OR People OR Preschool* OR Retiree* OR "Research subject" OR "pre school" OR Septuagenarian* OR Schoolchild* OR Seniors OR Sexagenarian* OR Student* OR Teen OR Teenager* OR Teens OR Toddler* OR Volunteer* OR Woman OR Women OR Youngster* OR Youth* ) AND LANGUAGE: (English)<br/> <i>Indexes=SCI-EXPANDED, ESCI, CCR-</i></p> | <u>7,365,008</u> | Humans   |

| Set | Query Web of Science                                                                                                                                                                                                                                                                                                                                                                                                                                                                                                                                                                                                                                                                                                                                                                                                                                                                                                                                                                                                                                                                                                                                                                                                                                                                                                                                                                                                                                                                                                                                                                                                                                                                                                                                           | Results          | Comments                |
|-----|----------------------------------------------------------------------------------------------------------------------------------------------------------------------------------------------------------------------------------------------------------------------------------------------------------------------------------------------------------------------------------------------------------------------------------------------------------------------------------------------------------------------------------------------------------------------------------------------------------------------------------------------------------------------------------------------------------------------------------------------------------------------------------------------------------------------------------------------------------------------------------------------------------------------------------------------------------------------------------------------------------------------------------------------------------------------------------------------------------------------------------------------------------------------------------------------------------------------------------------------------------------------------------------------------------------------------------------------------------------------------------------------------------------------------------------------------------------------------------------------------------------------------------------------------------------------------------------------------------------------------------------------------------------------------------------------------------------------------------------------------------------|------------------|-------------------------|
| # 6 | <p><i>EXPANDED, IC Timespan=2010-2021</i><br/>           (TI=((case NEAR/3 (control* OR histor* OR report OR reports OR stud OR serie*) ) OR "clinical trial*" OR cohort OR cohorts OR "cross sectional" OR "follow up stud*" OR longitudinal OR observational OR prospective OR trial OR retrospective OR "meta analysis*" OR metaanalys* OR epidemiol* OR Biomarker* OR "Biochemical marker*" OR "Biologic marker*" OR "Biological marker*" OR "Clinical marker*" OR "Laboratory marker*" OR Biomonitoring OR "Bio monitoring" OR "Biologic monitoring" OR "Biological monitoring")) OR AB=((case NEAR/3 (control* OR histor* OR report OR reports OR stud OR serie*) ) OR "clinical trial*" OR cohort OR cohorts OR "cross sectional" OR "follow up stud*" OR longitudinal OR observational OR prospective OR trial OR retrospective OR "meta analysis*" OR metaanalys* OR epidemiol* OR Biomarker* OR "Biochemical marker*" OR "Biologic marker*" OR "Biological marker*" OR "Clinical marker*" OR "Laboratory marker*" OR Biomonitoring OR "Bio monitoring" OR "Biologic monitoring" OR "Biological monitoring")) OR AK=((case NEAR/3 (control* OR histor* OR report OR reports OR stud OR serie*) ) OR "clinical trial*" OR cohort OR cohorts OR "cross sectional" OR "follow up stud*" OR longitudinal OR observational OR prospective OR trial OR retrospective OR "meta analysis*" OR metaanalys* OR epidemiol* OR Biomarker* OR "Biochemical marker*" OR "Biologic marker*" OR "Biological marker*" OR "Clinical marker*" OR "Laboratory marker*" OR Biomonitoring OR "Bio monitoring" OR "Biologic monitoring" OR "Biological monitoring")) AND LANGUAGE: (English)<br/> <i>Indexes=SCI-EXPANDED, ESCI, CCR-EXPANDED, IC Timespan=2010-2021</i></p> | <u>3,040,693</u> | Epidemiological studies |
| # 5 | <p>(TI=(Autops* OR histopath* OR "in vivo" OR "in vitro" OR GALT OR 3T3 OR A549 OR "BEAS 2B" OR "Caco 2 cell*" OR "CHO cell*" OR HELA OR HEpG2 OR HepaRG OR Jurkat OR "MCF 7" OR "cell line" OR "cell lines" OR "cell culture" OR "Colonic Epithelial Cell*" OR "Colorectal epithelial cell*" OR "Comet assay*" OR HPRT OR "Hypoxanthine Phosphoribosyltransferase" OR "hypoxanthin phosphoribosyl transferase" OR Lysosom* OR "M cell" OR "M cells" OR "Microfold cell" OR "Microfold cells" OR "Micronucleus assay*" OR "Micronucleus test*" OR "read across" OR SCGE assay* OR "single-cell gel</p>                                                                                                                                                                                                                                                                                                                                                                                                                                                                                                                                                                                                                                                                                                                                                                                                                                                                                                                                                                                                                                                                                                                                                         | <u>1,994,915</u> | In vitro/In vivo        |

| Set | Query Web of Science                                                                                                                                                                                                                                                                                                                                                                                                                                                                                                                                                                                                                                                                                                                                                                                                                                                                                                                                                                                                                                                                                                                                                                                                                                                                                                                                                                                                                                                                                                                                                                                                                                                                                                                                        | Results          | Comments     |
|-----|-------------------------------------------------------------------------------------------------------------------------------------------------------------------------------------------------------------------------------------------------------------------------------------------------------------------------------------------------------------------------------------------------------------------------------------------------------------------------------------------------------------------------------------------------------------------------------------------------------------------------------------------------------------------------------------------------------------------------------------------------------------------------------------------------------------------------------------------------------------------------------------------------------------------------------------------------------------------------------------------------------------------------------------------------------------------------------------------------------------------------------------------------------------------------------------------------------------------------------------------------------------------------------------------------------------------------------------------------------------------------------------------------------------------------------------------------------------------------------------------------------------------------------------------------------------------------------------------------------------------------------------------------------------------------------------------------------------------------------------------------------------|------------------|--------------|
|     | <p>electrophoresis assay*" OR Tissue* OR "xanthine guanine phosphoribosyl transferase" OR "xanthine guanine phosphoribosyltransferase" OR xpirt) OR AB=(Autops* OR histopath* OR "in vivo" OR "in vitro" OR GALT OR 3T3 OR A549 OR "BEAS 2B" OR "Caco 2 cell*" OR "CHO cell*" OR HELA OR HEpG2 OR HepaRG OR Jurkat OR "MCF 7" OR "cell line" OR "cell lines" OR "cell culture" OR "Colonic Epithelial Cell*" OR "Colorectal epithelial cell*" OR "Comet assay*" OR HPRT OR "Hypoxanthine Phosphoribosyltransferase" OR "hypoxanthin phosphoribosyl transferase" OR Lysosom* OR "M cell" OR "M cells" OR "Microfold cell" OR "Microfold cells" OR "Micronucleus assay*" OR "Micronucleus test*" OR "read across" OR SCGE assay* OR "single-cell gel electrophoresis assay*" OR Tissue* OR "xanthine guanine phosphoribosyl transferase" OR "xanthine guanine phosphoribosyltransferase" OR xpirt) OR AK=(Autops* OR histopath* OR "in vivo" OR "in vitro" OR GALT OR 3T3 OR A549 OR "BEAS 2B" OR "Caco 2 cell*" OR "CHO cell*" OR HELA OR HEpG2 OR HepaRG OR Jurkat OR "MCF 7" OR "cell line" OR "cell lines" OR "cell culture" OR "Colonic Epithelial Cell*" OR "Colorectal epithelial cell*" OR "Comet assay*" OR HPRT OR "Hypoxanthine Phosphoribosyltransferase" OR "hypoxanthin phosphoribosyl transferase" OR Lysosom* OR "M cell" OR "M cells" OR "Microfold cell" OR "Microfold cells" OR "Micronucleus assay*" OR "Micronucleus test*" OR "read across" OR SCGE assay* OR "single-cell gel electrophoresis assay*" OR Tissue* OR "xanthine guanine phosphoribosyl transferase" OR "xanthine guanine phosphoribosyltransferase" OR xpirt)) AND LANGUAGE: (English)</p> <p><i>Indexes=SCI-EXPANDED, ESCI, CCR-EXPANDED, IC Timespan=2010-2021</i></p> |                  |              |
| # 4 | <p>(TI=(((Cell OR cells) NEAR/3 (impairment* OR toxicity OR prolifer* OR survival) ) OR cytotox* OR "Endocrine disruptor*" OR Hormon* OR Estrogen* OR Oestrogen* OR Androgen* OR Apoptoses OR Apoptosis OR Aneugen* OR Aneuploid* OR Chromatid* OR Chromosome* OR Clastogen* OR (DNA NEAR/3 (binding OR fragment* OR damage* OR lesion* OR repair*) ) OR genotox* OR mutagen* OR Mutat* OR "oxidative stress*") OR AB=(((Cell OR cells) NEAR/3 (impairment* OR toxicity OR prolifer* OR</p>                                                                                                                                                                                                                                                                                                                                                                                                                                                                                                                                                                                                                                                                                                                                                                                                                                                                                                                                                                                                                                                                                                                                                                                                                                                                 | <u>1,545,796</u> | Genotoxicity |

| Set | Query Web of Science                                                                                                                                                                                                                                                                                                                                                                                                                                                                                                                                                                                                                                                                                                                                                                                                                                                                                                                                                                                                                                                                                                                                                                                                                                                     | Results          | Comments |
|-----|--------------------------------------------------------------------------------------------------------------------------------------------------------------------------------------------------------------------------------------------------------------------------------------------------------------------------------------------------------------------------------------------------------------------------------------------------------------------------------------------------------------------------------------------------------------------------------------------------------------------------------------------------------------------------------------------------------------------------------------------------------------------------------------------------------------------------------------------------------------------------------------------------------------------------------------------------------------------------------------------------------------------------------------------------------------------------------------------------------------------------------------------------------------------------------------------------------------------------------------------------------------------------|------------------|----------|
|     | <p>survival) ) OR cytotox* OR "Endocrine disruptor*" OR Hormon* OR Estrogen* OR Oestrogen* OR Androgen* OR Apoptoses OR Apoptosis OR Aneugen* OR Aneuploid* OR Chromatid* OR Chromosome* OR Clastogen* OR (DNA NEAR/3 (binding OR fragment* OR damage* OR lesion* OR repair*) ) OR genotox* OR mutagen* OR Mutat* OR "oxidative stress*" OR AK=(((Cell OR cells) NEAR/3 (impairment* OR toxicity OR prolifer* OR survival) ) OR cytotox* OR "Endocrine disruptor*" OR Hormon* OR Estrogen* OR Oestrogen* OR Androgen* OR Apoptoses OR Apoptosis OR Aneugen* OR Aneuploid* OR Chromatid* OR Chromosome* OR Clastogen* OR (DNA NEAR/3 (binding OR fragment* OR damage* OR lesion* OR repair*) ) OR genotox* OR mutagen* OR Mutat* OR "oxidative stress*")) AND LANGUAGE: (English)</p> <p><i>Indexes=SCI-EXPANDED, ESCI, CCR-EXPANDED, IC Timespan=2010-2021</i></p>                                                                                                                                                                                                                                                                                                                                                                                                       |                  |          |
| # 3 | <p>(TI=("dose response" OR "dose effect*" OR Hypertoxic* OR intoxic* OR lethal* OR "No Observed Adverse Effect Level" OR "No Observed Adverse Effect Levels" OR "No Observed Effect Level" OR "No Observed Effect Levels" OR "No Observable Adverse Effect Level" OR "No Observable Adverse Effect Levels" OR "No Observable Effect Level" OR "No Observable Effect Levels" OR NOAEL OR NOAELs OR NOEL OR NOELs OR Toxic* OR Brain OR Brains OR Cerebellum OR Cortex OR Hippocamp* OR Neurobehav* OR ((neurologic OR nervous) AND (disease* OR disorder* OR dysfunction* OR manifestation*)) ) OR "nervous system*" OR Neuroanatom* OR neurocognit* OR neurolog* OR neuropath* OR Neurotoxi* OR Adenocar* OR Cancer* OR Carcino* OR "Cell grow*" OR Cocarcino* OR Lymphom* OR Neoplas* OR Tumor* OR Tumour* OR Allerg* OR Immunol* OR Immunotox* OR "Immune system" OR Lymph node* OR Lymphatic node* OR Lymphoid tissue* OR Lymphatic tissue* OR Macrophage* OR Peyer's patch* OR Peyer patch* OR sensitization OR sensitization OR Spleen* OR Thymic OR Thymus+OR Bladder OR Cardiotox* OR Cardiomiopath* OR Coronary OR Heart OR Hepati* OR Hepato* OR Kidney* OR Liver OR Lung OR Lungs OR Myocardit* OR Nephropath* OR Nephrotox* OR Pericardit* OR Pulmonar OR</p> | <u>8,771,162</u> | Toxicity |

| Set | Query Web of Science                                                                                                                                                                                                                                                                                                                                                                                                                                                                                                                                                                                                                                                                                                                                                                                                                                                                                                                                                                                                                                                                                                                                                                                                                                                                                                                                                                                                                                                                                                                                                                                                                                                                                                                                                                                                                                                                                                                                                                                                                                                                                                                                                                                                                                                 | Results | Comments |
|-----|----------------------------------------------------------------------------------------------------------------------------------------------------------------------------------------------------------------------------------------------------------------------------------------------------------------------------------------------------------------------------------------------------------------------------------------------------------------------------------------------------------------------------------------------------------------------------------------------------------------------------------------------------------------------------------------------------------------------------------------------------------------------------------------------------------------------------------------------------------------------------------------------------------------------------------------------------------------------------------------------------------------------------------------------------------------------------------------------------------------------------------------------------------------------------------------------------------------------------------------------------------------------------------------------------------------------------------------------------------------------------------------------------------------------------------------------------------------------------------------------------------------------------------------------------------------------------------------------------------------------------------------------------------------------------------------------------------------------------------------------------------------------------------------------------------------------------------------------------------------------------------------------------------------------------------------------------------------------------------------------------------------------------------------------------------------------------------------------------------------------------------------------------------------------------------------------------------------------------------------------------------------------|---------|----------|
|     | <p>Renal disease OR Renal disorder OR Renal injur* OR Abortion* OR Abortiv* OR Abnormalit* OR Congeni* OR Embryo* OR Fetal OR Foetal OR Fertility OR Fetotoxic* OR Foetotoxic* OR Fetus OR Fetuses OR Foetus OR Foetuses OR Genital disease* OR Gestation* OR "In utero" OR Infertility OR Malformat* OR Miscarriage* OR Ovary OR Ovari* OR Pregnan* OR "Prenatal disorder*" OR "Prenatal exposure*" OR "Prenatal structure*" OR Perinatal OR Postnatal OR Reproducti* OR Reprotox* OR Skin OR dermal OR Sterility OR Sperm* OR Teratogen* OR Testes OR Testis OR Testicle* OR Testicular* OR Thyroid* OR Thyrotox* OR Urogenital disease* OR Uterus OR Development* OR "behavioural" OR "behavioral" OR ((Behaviour* OR Behavior*) AND (animal* OR human* OR pup OR litter OR child* OR adult*) ) OR Cognition* OR Cognitiv* OR Comprehensi* OR Depressi* OR DNT OR developmental OR (Development* AND (animal* OR human* OR pup OR litter OR child* OR adult*) ) OR (Executive AND (control OR function* OR dysfunction* OR impair*) ) OR intelligence OR Learning OR Locomotor* OR (memor* AND (disorder* OR dysfunction* OR impair*) ) OR metamemory* OR Ontogen* OR Organogene* OR Neurocognitive* OR Neuropsycholog* OR neurodevelopment* OR "placental barrier*" OR "adverse effect*" OR "adverse health effect*" OR "adverse reaction" OR Death* OR Dead OR "Fatal outcome" OR Mortality* OR diabet* OR (glucose NEAR/3 (homeosta* OR metabolism*) ) ) OR AB=("dose response" OR "dose effect*" OR Hypertoxic* OR intox* OR lethal* OR "No Observed Adverse Effect Level" OR "No Observed Adverse Effect Levels" OR "No Observed Effect Level" OR "No Observed Effect Levels" OR "No Observable Adverse Effect Level" OR "No Observable Adverse Effect Levels" OR "No Observable Effect Level" OR "No Observable Effect Levels" OR NOAEL OR NOELs OR NOEL OR NOELs OR Toxic* OR Brain OR Brains OR Cerebellum OR Cortex OR Hippocampus* OR Neurobehav* OR ((neurologic OR nervous) AND (disease* OR disorder* OR dysfunction* OR manifestation*) ) OR "nervous system*" OR Neuroanatom* OR neurocognit* OR neurolog* OR neuropath* OR Neurotoxi* OR Adenocarcinoma* OR Cancer* OR Carcino* OR "Cell growth*" OR Cocarcino* OR Lymphom* OR Neoplas* OR Tu</p> |         |          |

| Set | Query Web of Science                                                                                                                                                                                                                                                                                                                                                                                                                                                                                                                                                                                                                                                                                                                                                                                                                                                                                                                                                                                                                                                                                                                                                                                                                                                                                                                                                                                                                                                                                                                                                                                                                                                                                                                                                                                                                                                                                                                                                                                                                                                                                                                                                                                                                                                                                       | Results | Comments |
|-----|------------------------------------------------------------------------------------------------------------------------------------------------------------------------------------------------------------------------------------------------------------------------------------------------------------------------------------------------------------------------------------------------------------------------------------------------------------------------------------------------------------------------------------------------------------------------------------------------------------------------------------------------------------------------------------------------------------------------------------------------------------------------------------------------------------------------------------------------------------------------------------------------------------------------------------------------------------------------------------------------------------------------------------------------------------------------------------------------------------------------------------------------------------------------------------------------------------------------------------------------------------------------------------------------------------------------------------------------------------------------------------------------------------------------------------------------------------------------------------------------------------------------------------------------------------------------------------------------------------------------------------------------------------------------------------------------------------------------------------------------------------------------------------------------------------------------------------------------------------------------------------------------------------------------------------------------------------------------------------------------------------------------------------------------------------------------------------------------------------------------------------------------------------------------------------------------------------------------------------------------------------------------------------------------------------|---------|----------|
|     | <p> mor* OR Tumour* OR Allerg*<br/> OR Immunol* OR Immunotox* OR "Immune system" OR Lymph node* OR Lymphatic node*<br/> OR Lymphoid tissue* OR Lymphatic tissue* OR Macrophage* OR Peyer's patch* OR Peyer patch* OR sensitisation OR sensitization OR Spleen* OR Thymic OR Thymus OR Bladder OR Cardiotox* OR Cardiomiopath* OR Coronary OR Heart OR Hepati* OR Hepato* OR Kidney* OR Liver OR Lung OR Lungs OR Myocardit* OR Nephropath* OR Nephrotox* OR Pericardit* OR Pulmonar OR Renal disease OR Renal disorder OR Renal injur* OR Abortion* OR Abortiv* OR Abnormalit* OR Congeni* OR Embryo* OR Fetal OR Foetal OR Fertility OR Fetotoxic* OR Foetotoxic* OR Fetus OR Fetuses OR Foetus OR Fetuses OR Genital disease* OR Gestation* OR "In utero" OR Infertility OR Malformat* OR Miscarriage* OR Ovary OR Ovari* OR Pregnan* OR "Prenatal disorder*" OR "Prenatal exposure*" OR "Prenatal structure*" OR Perinatal OR Postnatal OR Reproducti* OR Reprotox* OR Skin OR dermal OR Sterility OR Sperm* OR Teratogen* OR Testes OR Testis OR Testicle* OR Testicular* OR Thyroid* OR Thyrotox* OR Urogenital disease* OR Uterus OR Development* OR "behavioural" OR "behavioral" OR ((Behaviour* OR Behavior*) AND (animal* OR human* OR pup OR litter OR child* OR adult*)) ) OR Cognition* OR Cognitiv* OR Comprehensi* OR Depressi* OR DNT OR developmental OR (Development* AND (animal* OR human* OR pup OR litter OR child* OR adult*)) ) OR (Executive AND (control OR function* OR dysfunction* OR impair*)) ) OR intelligence OR Learning OR Locomotor* OR (memor* AND (disorder* OR dysfunction* OR impair*)) ) OR metamemory* OR Ontogen* OR Organogene* OR Neurocognitive* OR Neuropsycholog* OR neurodevelopment* OR "placental barrier*" OR "adverse effect*" OR "adverse health effect*" OR "adverse reaction" OR Death* OR Dead OR "Fatal outcome" OR Mortality* OR diabet* OR (glucose NEAR/3 (homeosta* OR metabolism*)) ) ) OR AK=("dose response" OR "dose effect*" OR Hypertoxic* OR intox* OR lethal* OR "No Observed Adverse Effect Level" OR "No Observed Adverse Effect Levels" OR "No Observed Effect Level" OR "No Observed Effect Levels" OR "No Observable Adverse Effect Level" OR "No Observable Adverse Effect Levels" OR "No Observable Effect Level" OR "No </p> |         |          |



| Set | Query Web of Science                                                                                                                                                                                                                                                                                                                                                                                                                                                                                                                                                                                                                                                                                                                                                                                                                                                                                                                                                                                                                                                                                                                                                                                                                                                                                                                                                                                                                                                                                                                                                                                                                                                                                                                                                                                                                                                                                                                                                                                                                                                                                                                                                                                                                                                                                                                                                | Results | Comments |
|-----|---------------------------------------------------------------------------------------------------------------------------------------------------------------------------------------------------------------------------------------------------------------------------------------------------------------------------------------------------------------------------------------------------------------------------------------------------------------------------------------------------------------------------------------------------------------------------------------------------------------------------------------------------------------------------------------------------------------------------------------------------------------------------------------------------------------------------------------------------------------------------------------------------------------------------------------------------------------------------------------------------------------------------------------------------------------------------------------------------------------------------------------------------------------------------------------------------------------------------------------------------------------------------------------------------------------------------------------------------------------------------------------------------------------------------------------------------------------------------------------------------------------------------------------------------------------------------------------------------------------------------------------------------------------------------------------------------------------------------------------------------------------------------------------------------------------------------------------------------------------------------------------------------------------------------------------------------------------------------------------------------------------------------------------------------------------------------------------------------------------------------------------------------------------------------------------------------------------------------------------------------------------------------------------------------------------------------------------------------------------------|---------|----------|
|     | <p>Observable Effect Levels" OR NOAEL OR NOAE Ls OR NOEL OR NOELs OR Toxic* OR Brain OR Brains OR Cerebellum OR Cortex OR Hippocampus* OR Neurobehav* OR ((neurologic OR nervous) AND (disease* OR disorder* OR dysfunction* OR manifestation*)) ) OR "nervous system*" OR Neuroanatom* OR neurocognit* OR neurolog* OR neuropath* OR Neurotoxi* OR Adenocarcinoma* OR Cancer* OR Carcinoma* OR "Cell growth*" OR Cocarcinoma* OR Lymphoma* OR Neoplasia* OR Tumor* OR Tumour* OR Allergy* OR Immunology* OR Immunotoxic* OR "Immune system" OR Lymph node* OR Lymphatic node* OR Lymphoid tissue* OR Lymphatic tissue* OR Macrophage* OR Peyer's patch* OR Peyer patch* OR sensitization OR sensitization OR Spleen* OR Thymus OR Thymus OR Bladder OR Cardiotoxic* OR Cardiomyopathy* OR Coronary OR Heart OR Hepatitis* OR Hepatotoxic* OR Kidney* OR Liver OR Lung OR Lungs OR Myocarditis* OR Nephropathy* OR Nephrotoxic* OR Pericarditis* OR Pulmonary OR Renal disease OR Renal disorder OR Renal injury* OR Abortion* OR Abortifacient* OR Abnormalities* OR Congenital* OR Embryo* OR Fetal OR Foetal OR Fertility OR Fetotoxic* OR Foetotoxic* OR Fetus OR Fetuses OR Foetus OR Foetuses OR Genital disease* OR Gestation* OR "In utero" OR Infertility OR Malformation* OR Miscarriage* OR Ovary OR Ovary* OR Pregnant* OR "Prenatal disorder*" OR "Prenatal exposure*" OR "Prenatal structure*" OR Perinatal OR Postnatal OR Reproductive* OR Reprotoxic* OR Skin OR dermal OR Sterility OR Sperm* OR Teratogen* OR Testes OR Testis OR Testicle* OR Testicular* OR Thyroid* OR Thyrotoxic* OR Urogenital disease* OR Uterus OR Development* OR "behavioural" OR "behavioral" OR ((Behaviour* OR Behavior*) AND (animal* OR human* OR pup OR litter OR child* OR adult*)) ) OR Cognition* OR Cognitive* OR Comprehension* OR Depressive* OR DNT OR developmental OR (Development* AND (animal* OR human* OR pup OR litter OR child* OR adult*)) ) OR (Executive AND (control OR function* OR dysfunction* OR impairment*)) ) OR intelligence OR Learning OR Locomotor* OR (memory* AND (disorder* OR dysfunction* OR impairment*)) ) OR metamemory* OR Ontogen* OR Organogenesis* OR Neurocognitive* OR Neuropsychology* OR neurodevelopment* OR "placental barrier*" OR "adverse effect*" OR "adverse health effect*" OR "adverse reaction" OR De</p> |         |          |

| Set | Query Web of Science                                                                                                                                                                                                                                                                                                                                                                                                                                                                                                                                                                                                                                                                                                                                                                                                                                                                                                                                                                                                                                                                                                                                                                                                                                                                                                                                                                                                                                                                                                                                                                                                                                                                                                                                                                                                                                                                                                                                                                                                                                                                            | Results          | Comments |
|-----|-------------------------------------------------------------------------------------------------------------------------------------------------------------------------------------------------------------------------------------------------------------------------------------------------------------------------------------------------------------------------------------------------------------------------------------------------------------------------------------------------------------------------------------------------------------------------------------------------------------------------------------------------------------------------------------------------------------------------------------------------------------------------------------------------------------------------------------------------------------------------------------------------------------------------------------------------------------------------------------------------------------------------------------------------------------------------------------------------------------------------------------------------------------------------------------------------------------------------------------------------------------------------------------------------------------------------------------------------------------------------------------------------------------------------------------------------------------------------------------------------------------------------------------------------------------------------------------------------------------------------------------------------------------------------------------------------------------------------------------------------------------------------------------------------------------------------------------------------------------------------------------------------------------------------------------------------------------------------------------------------------------------------------------------------------------------------------------------------|------------------|----------|
|     | <p>ath* OR Dead OR "Fatal outcome" OR Mortalit<br/>* OR diabet* OR (glucose NEAR/3<br/>(homeostas* OR<br/>metabolism*) ) ) ) AND LANGUAGE: (English)</p> <p><i>Indexes=SCI-EXPANDED, ESCI, CCR-<br/>EXPANDED, IC Timespan=2010-2021</i></p>                                                                                                                                                                                                                                                                                                                                                                                                                                                                                                                                                                                                                                                                                                                                                                                                                                                                                                                                                                                                                                                                                                                                                                                                                                                                                                                                                                                                                                                                                                                                                                                                                                                                                                                                                                                                                                                     |                  |          |
| # 2 | <p>(TI=(ADME OR accumul* OR bioavail* OR<br/>bioconcentr* OR biodistribut* OR "biologic<br/>avail*" OR biotrans* OR clearance* OR<br/>degrad* OR detox* OR distribut* OR dosim*<br/>OR eliminat* OR excret* OR kinetic* OR<br/>metaboli* OR "mode of action" OR<br/>"mechanism of action" OR pharmacokinetic*<br/>OR PBPK OR "pb pk" OR PBTK OR "pb tk" OR<br/>"pk model*" OR "tk model*" OR reabsorption<br/>OR retention OR secretion* OR toxicokinetic*<br/>OR transport* OR uptake* OR urination OR<br/>((absorb OR absorbs OR absorbed OR<br/>absorption* OR deposit*) NOT (atomic OR<br/>optical OR spectra* OR spectros* OR<br/>spectrum* OR<br/>infrared) )) OR AB=(ADME OR accumul* OR<br/>bioavail* OR bioconcentr* OR biodistribut* O<br/>R "biologic avail*" OR biotrans* OR clearance*<br/>OR degrad* OR detox* OR distribut* OR dosi<br/>m* OR eliminat* OR excret* OR kinetic* OR<br/>metaboli* OR "mode of action" OR "mechani<br/>m of action" OR pharmacokinetic* OR PBPK O<br/>R "pb pk" OR PBTK OR "pb tk" OR "pk model*<br/>" OR "tk model*" OR reabsorption OR retenti<br/>on OR secretion* OR toxicokinetic* OR transpor<br/>t* OR uptake* OR urination OR ((absorb OR<br/>absorbs OR absorbed OR absorption* OR<br/>deposit*) NOT (atomic OR optical OR spectra*<br/>OR spectros* OR spectrum* OR<br/>infrared) )) OR AK=( ADME OR accumul* O<br/>R bioavail* OR bioconcentr* OR biodistribut*<br/>OR "biologic avail*" OR biotrans* OR clearanc<br/>e* OR degrad* OR detox* OR distribut* OR d<br/>osim* OR eliminat* OR excret* OR kinetic* O<br/>R metaboli* OR "mode of action" OR "mechani<br/>sm of action" OR pharmacokinetic* OR PBPK<br/>OR "pb pk" OR PBTK OR "pb tk" OR "pk model<br/>*" OR "tk model*" OR reabsorption OR retenti<br/>on OR secretion* OR toxicokinetic* OR transp<br/>ort* OR uptake* OR urination OR ((absorb OR<br/>absorbs OR absorbed OR absorption* OR<br/>deposit*) NOT (atomic OR optical OR spectra*<br/>OR spectros* OR spectrum* OR<br/>infrared) ))) AND LANGUAGE: (English)</p> <p><i>Indexes=SCI-EXPANDED, ESCI, CCR-</i></p> | <u>4,987,764</u> | ADME     |

| Set | Query Web of Science                                                                                                                                                                                                                                                                                                                                                                                                                                                                                                                                                                                                                                                                                                                                                                                                                                                                                                                                                                                                                                                                                                                                                                                                                                                                                                                                                                                                                | Results       | Comments |
|-----|-------------------------------------------------------------------------------------------------------------------------------------------------------------------------------------------------------------------------------------------------------------------------------------------------------------------------------------------------------------------------------------------------------------------------------------------------------------------------------------------------------------------------------------------------------------------------------------------------------------------------------------------------------------------------------------------------------------------------------------------------------------------------------------------------------------------------------------------------------------------------------------------------------------------------------------------------------------------------------------------------------------------------------------------------------------------------------------------------------------------------------------------------------------------------------------------------------------------------------------------------------------------------------------------------------------------------------------------------------------------------------------------------------------------------------------|---------------|----------|
|     | <i>EXPANDED, IC Timespan=2010-2021</i>                                                                                                                                                                                                                                                                                                                                                                                                                                                                                                                                                                                                                                                                                                                                                                                                                                                                                                                                                                                                                                                                                                                                                                                                                                                                                                                                                                                              |               |          |
| # 1 | <p>(TI=(arsenic OR arsenate OR arsenite OR "as III" OR "as V" OR asiii OR asV OR iAs OR Dimethylarsinate OR Dimethylarsinite OR Methylarsonate OR Methylarsonite OR "Thio dimethylarsinate" OR "DMA III" OR dmaIII OR "Thio DMA" OR "Dimethyl arsenic acid" OR "Methyl arsenic acid" OR "MA III" OR MAIII OR "dimethylarsinous acid*" OR "monomethylarsonic acid*" OR 7440-38-2 OR 15584-04-0 OR 15132-04-4 OR 51952-65-9 OR 25400-23-1) OR AB=(arsenic OR arsenate OR arsenite OR "as III" OR "as V" OR asiii OR asV OR iAs OR Dimethylarsinate OR Dimethylarsinite OR Methylarsonate OR Methylarsonite OR "Thio dimethylarsinate" OR "DMA III" OR dmaIII OR "Thio DMA" OR "Dimethyl arsenic acid" OR "Methyl arsenic acid" OR "MA III" OR MAIII OR "dimethylarsinous acid*" OR "monomethylarsonic acid*" OR 7440-38-2 OR 15584-04-0 OR 15132-04-4 OR 51952-65-9 OR 25400-23-1) OR AK=(arsenic OR arsenate OR arsenite OR "as III" OR "as V" OR asiii OR asV OR iAs OR Dimethylarsinate OR Dimethylarsinite OR Methylarsonate OR Methylarsonite OR "Thio dimethylarsinate" OR "DMA III" OR dmaIII OR "Thio DMA" OR "Dimethyl arsenic acid" OR "Methyl arsenic acid" OR "MA III" OR MAIII OR "dimethylarsinous acid*" OR "monomethylarsonic acid*" OR 7440-38-2 OR 15584-04-0 OR 15132-04-4 OR 51952-65-9 OR 25400-23-1)) AND LANGUAGE: (English)</p> <p><i>Indexes=SCI-EXPANDED, ESCI, CCR-EXPANDED, IC Timespan=2010-2021</i></p> | <u>39,398</u> | Arsenic  |

| Search | Query Pubmed                                                                                                                                                                                                                                                                      | Results           | Comments                                                                                              |
|--------|-----------------------------------------------------------------------------------------------------------------------------------------------------------------------------------------------------------------------------------------------------------------------------------|-------------------|-------------------------------------------------------------------------------------------------------|
| #20    | Search: #19 OR #17 Sort by: Most Recent                                                                                                                                                                                                                                           | <u>4,079</u>      | Animal toxicity OR Genotoxicity                                                                       |
| #19    | Search: #18 AND ("2010"[Date - Publication] : "3000"[Date - Publication]) AND ("english"[Language]) Sort by: Most Recent                                                                                                                                                          | <u>2,534</u>      | Animal Toxicity: Arsenic AND Toxicity AND Animals AND Time and Language limits                        |
| #18    | Search: #1 AND #3 AND #5 Sort by: Most Recent                                                                                                                                                                                                                                     | <u>5,740</u>      | Arsenic AND Toxicity AND Animals                                                                      |
| #17    | Search: #16 AND ("2010"[Date - Publication] : "3000"[Date - Publication]) AND ("english"[Language]) Sort by: Most Recent                                                                                                                                                          | <u>3,022</u>      | Genotoxicity: Arsenic AND Genotoxicity AND (Animals OR In vitro/in vivo) AND Time and Language limits |
| #16    | Search: #1 AND #4 AND #15 Sort by: Most Recent                                                                                                                                                                                                                                    | <u>5,800</u>      | Arsenic AND Genotoxicity AND (Animals OR In vitro/in vivo)                                            |
| #15    | Search: #5 OR #7 Sort by: Most Recent                                                                                                                                                                                                                                             | <u>7,732,244</u>  | Animals OR In vitro/In vivo                                                                           |
| #14    | Search: ("review"[Publication Type] OR "systematic review"[Filter]) AND #13 Sort by: Most Recent                                                                                                                                                                                  | <u>701</u>        | ADME reviews: Arsenic AND ADME AND (Animals OR Humans) AND Time and Language limits AND reviews       |
| #13    | Search: #12 AND ("2010"[Date - Publication] : "3000"[Date - Publication]) AND ("english"[Language]) Sort by: Most Recent                                                                                                                                                          | <u>7,640</u>      | Arsenic AND ADME AND (Animals OR Humans) AND Time and Language limits                                 |
| #12    | Search: #1 AND #2 AND #11 Sort by: Most Recent                                                                                                                                                                                                                                    | <u>14,595</u>     | Arsenic AND ADME AND (Animals OR Humans)                                                              |
| #11    | Search: #5 OR #6 Sort by: Most Recent                                                                                                                                                                                                                                             | <u>24,449,665</u> | Animals OR Humans                                                                                     |
| #10    | Search: #9 AND ("2010"[Date - Publication] : "3000"[Date - Publication]) AND ("english"[Language]) Sort by: Most Recent                                                                                                                                                           | <u>4,468</u>      | Human studies: Arsenic AND Humans AND Epidemiological studies AND Time and Language limit             |
| #9     | Search: #1 AND #6 AND #8 Sort by: Most Recent                                                                                                                                                                                                                                     | <u>7,884</u>      | Arsenic AND Humans AND Epidemiological studies                                                        |
| #8     | Search: "Epidemiologic Research Design"[Mesh] OR "Epidemiologic Studies"[Mesh] OR "epidemiology"[Subheading] OR "Clinical Study"[Publication Type] OR "Case Reports"[Publication Type] OR "Randomized Controlled Trial"[Publication Type] OR "Meta-Analysis"[Publication Type] OR | <u>9,297,424</u>  | Epidemiological studies                                                                               |

| Search | Query Pubmed                                                                                                                                                                                                                                                                                                                                                                                                                                                                                                                                                                                                                                                                                                                                                                                                                                                                                                                                                                                                                                                                                                                                                                                                                                                                                                                                                                                                                                                                                                                                                                                                                                                                                                                                                                                                                                                                  | Results          | Comments         |
|--------|-------------------------------------------------------------------------------------------------------------------------------------------------------------------------------------------------------------------------------------------------------------------------------------------------------------------------------------------------------------------------------------------------------------------------------------------------------------------------------------------------------------------------------------------------------------------------------------------------------------------------------------------------------------------------------------------------------------------------------------------------------------------------------------------------------------------------------------------------------------------------------------------------------------------------------------------------------------------------------------------------------------------------------------------------------------------------------------------------------------------------------------------------------------------------------------------------------------------------------------------------------------------------------------------------------------------------------------------------------------------------------------------------------------------------------------------------------------------------------------------------------------------------------------------------------------------------------------------------------------------------------------------------------------------------------------------------------------------------------------------------------------------------------------------------------------------------------------------------------------------------------|------------------|------------------|
| #7     | <p>"Biomarkers"[Mesh] OR "Biological Monitoring"[Mesh] OR "case control*"[tiab] OR Case history* [tiab] OR "case report"[tiab] OR "case reports"[tiab] OR Case stud*[tiab] OR Case serie*[tiab] OR "clinical trial*"[tiab] OR cohort [tiab] OR cohorts[tiab] OR "cross sectional" [tiab] OR "follow-up study" [tiab] OR Longitudinal[tiab] OR Observational[tiab] OR prospective [tiab] OR "randomized control trial*"[tiab] OR Retrospective[tiab] OR Metaanalys*[tiab] OR "meta analys*"[tiab] OR epidemiol*[tiab] OR biomarker*[tiab] OR biochemical marker*[tiab] OR biologic marker*[tiab] OR biological marker*[tiab] OR clinical marker*[tiab] OR laboratory marker*[tiab] OR biomonitoring[tiab] OR "bio monitoring"[tiab] OR "biologic monitoring"[tiab] OR "biological monitoring"[tiab] Sort by: Most Recent Search: "In Vitro Techniques"[Mesh] OR "Caco-2 Cells"[Mesh] OR "Cells, Cultured"[Mesh] OR "Culture Media"[Mesh] OR "Lysosomes"[Mesh] OR "Hypoxanthine Phosphoribosyltransferase"[Mesh] OR "Autopsy"[Mesh] OR "Micronucleus Tests"[Mesh] OR "Pathology"[Mesh] OR Autops*[tiab] OR histopath*[tiab] OR "in vivo"[tiab] OR "in vitro"[tiab] OR GALT[tiab] OR 3T3[tiab] OR A549[tiab] OR "BEAS 2B"[tiab] OR Caco 2 cell*[tiab] OR CHO cell*[tiab] OR HELA[tiab] OR HEpG2[tiab] OR HepaRG[tiab] OR Jurkat[tiab] OR "MCF 7"[tiab] OR "cell line"[tiab] OR "cell lines"[tiab] OR "cell culture"[tiab] OR Colonic Epithelial Cell*[tiab] OR Colorectal epithelial cell*[tiab] OR Comet assay*[tiab] OR HPRT[tiab] OR "Hypoxanthine Phosphoribosyltransferase"[tiab] OR "hypoxanthin phosphoribosyl transferase"[tiab] OR Lysosom*[tiab] OR "M cell"[tiab] OR "M cells"[tiab] OR "Microfold cell"[tiab] OR "Microfold cells"[tiab] OR Micronucleus assay*[tiab] OR Micronucleus test*[tiab] OR "read across"[tiab] OR SCGE assay*[tiab] OR single-cell gel</p> | <u>5,243,942</u> | In vitro/In vivo |

| Search | Query Pubmed                                                                                                                                                                                                                                                                                                                                                                                                                                                                                                                                                                                                                                                                                                                                                                                                                                                                                                                                                                                                                                                                                                                                                                                                                                                                                                                                                                                                                                                              | Results           | Comments |
|--------|---------------------------------------------------------------------------------------------------------------------------------------------------------------------------------------------------------------------------------------------------------------------------------------------------------------------------------------------------------------------------------------------------------------------------------------------------------------------------------------------------------------------------------------------------------------------------------------------------------------------------------------------------------------------------------------------------------------------------------------------------------------------------------------------------------------------------------------------------------------------------------------------------------------------------------------------------------------------------------------------------------------------------------------------------------------------------------------------------------------------------------------------------------------------------------------------------------------------------------------------------------------------------------------------------------------------------------------------------------------------------------------------------------------------------------------------------------------------------|-------------------|----------|
| #6     | <p>electrophoresis assay*[tiab] OR<br/>Tissue*[tiab] OR "xanthine guanine<br/>phosphoribosyl transferase"[tiab] OR<br/>"xanthine guanine<br/>phosphoribosyltransferase"[tiab] OR<br/>xprt[tiab] Sort by: Most Recent<br/>Search: "Age Groups"[Mesh] OR<br/>"Human Experimentation"[Mesh] OR<br/>"Humans"[Mesh] OR "Patients"[Mesh]<br/>OR "Patient Participation"[Mesh] OR<br/>"Research Subjects"[Mesh] OR<br/>Aged[tiab] OR Baby[tiab] OR<br/>Babies[tiab] OR Boy[tiab] OR<br/>Boys[tiab] OR Boyhood[tiab] OR<br/>Centenarian*[tiab] OR Child*[tiab] OR<br/>Citizen*[tiab] OR Client*[tiab] OR<br/>Elder*[tiab] OR Girl[tiab] OR Girls[tiab]<br/>OR Girlhood[tiab] OR Human*[tiab] OR<br/>Inpatient*[tiab] OR Kindergarten*[tiab]<br/>OR Man[tiab] OR Men[tiab] OR "middle<br/>age"[tiab] OR Newborn*[tiab] OR "new<br/>born*"[tiab] OR Nonagenarian*[tiab]<br/>OR Octogenarian*[tiab] OR<br/>Outpatient*[tiab] OR Participant*[tiab]<br/>OR Patient*[tiab] OR Pediatric*[tiab]<br/>OR Paediatric*[tiab] OR Person*[tiab]<br/>OR People[tiab] OR Preschool*[tiab] OR<br/>Retiree*[tiab] OR "Research<br/>subject"[tiab] OR "pre school"[tiab] OR<br/>Septuagenarian*[tiab] OR<br/>Schoolchild*[tiab] OR Seniors[tiab] OR<br/>Sexagenarian*[tiab] OR Student*[tiab]<br/>OR Teen[tiab] OR Teenager*[tiab] OR<br/>Teens[tiab] OR Toddler*[tiab] OR<br/>Volunteer*[tiab] OR Woman[tiab] OR<br/>Women[tiab] OR Youngster*[tiab] OR<br/>Youth*[tiab] Sort by: Most Recent</p> | <u>21,467,843</u> | Humans   |
| #5     | <p>Search: "Animal<br/>Experimentation"[Mesh] OR "Guinea<br/>Pigs"[Mesh] OR "Muridae"[Mesh] OR<br/>"Rodentia"[Mesh:NoExp] OR<br/>"Cats"[Mesh] OR "Dogs"[Mesh] OR<br/>"Mink"[Mesh] OR "Swine"[Mesh] OR<br/>"Models, Animal"[Mesh] OR<br/>"Primates"[Mesh:NoExp] OR<br/>Cavia[tiab] OR Cricetinae[tiab] OR<br/>Cricetus[tiab] OR "guinea pig"[tiab] OR<br/>"guinea pigs"[tiab] OR Hamster[tiab]<br/>OR Mice[tiab] OR Mouse[tiab] OR<br/>Muridae[tiab] OR Murinae[tiab] OR<br/>Murine[tiab] OR Mus[tiab] OR Rat[tiab]<br/>OR Rats[tiab] OR Rattus[tiab] OR<br/>Rodent*[tiab] OR Felis[tiab] OR</p>                                                                                                                                                                                                                                                                                                                                                                                                                                                                                                                                                                                                                                                                                                                                                                                                                                                                           | <u>4,568,796</u>  | Animals  |

| Search | Query Pubmed                                                                                                                                                                                                                                                                                                                                                                                                                                                                                                                                                                                                                                                                                                                                                                                                                                                                                                                                                                                                                                                                                                                                                                                                                                                                                                    | Results          | Comments     |
|--------|-----------------------------------------------------------------------------------------------------------------------------------------------------------------------------------------------------------------------------------------------------------------------------------------------------------------------------------------------------------------------------------------------------------------------------------------------------------------------------------------------------------------------------------------------------------------------------------------------------------------------------------------------------------------------------------------------------------------------------------------------------------------------------------------------------------------------------------------------------------------------------------------------------------------------------------------------------------------------------------------------------------------------------------------------------------------------------------------------------------------------------------------------------------------------------------------------------------------------------------------------------------------------------------------------------------------|------------------|--------------|
|        | Cat[tiab] OR Cats[tiab] OR Catus[tiab]<br>OR Dog[tiab] OR Dogs[tiab] OR<br>Canine*[tiab] OR Canis[tiab] OR<br>Mink[tiab] OR Minks[tiab] OR<br>Mustela*[tiab] OR Pig[tiab] OR<br>Pigs[tiab] OR Swine[tiab] OR<br>Piglet*[tiab] OR Monkey[tiab] OR<br>Monkeys[tiab] OR Nomascus[tiab] OR<br>Primate*[tiab] Sort by: Most Recent                                                                                                                                                                                                                                                                                                                                                                                                                                                                                                                                                                                                                                                                                                                                                                                                                                                                                                                                                                                   |                  |              |
| #4     | Search: "Cell Survival"[Mesh] OR<br>"Cytotoxins"[Mesh] OR "Endocrine<br>disruptors"[Mesh] OR<br>"Hormones"[Mesh] OR<br>"Macrophages"[Mesh] OR<br>"Aneugens"[Mesh] OR<br>"Aneuploidy"[Mesh] OR<br>"apoptosis"[Mesh] OR<br>"Chromatids"[Mesh] OR<br>"Chromosomes"[Mesh] OR<br>"Chromosome Aberrations"[Mesh] OR<br>"DNA Damage"[Mesh] OR "DNA<br>Repair"[Mesh] OR "Mutagenicity<br>Tests"[Mesh] OR "Mutagens"<br>[Pharmacological Action] OR<br>"Mutagens"[Mesh] OR<br>"Mutagenesis"[Mesh] OR "Oxidative<br>Stress"[Mesh] OR Cell<br>impairment*[tiab] OR Cells<br>impairment*[tiab] OR Cell toxicity<br>[tiab] OR Cells toxicity[tiab] OR Cell<br>prolifer*[tiab] OR Cells prolifer* [tiab]<br>OR Cell survival [tiab] OR Cells<br>survival[tiab] OR cytotox* [tiab] OR<br>Endocrine disruptor*[tiab] OR Hormon*<br>[tiab] OR Estrogen*[tiab] OR<br>Oestrogen*[tiab] OR Androgen*[tiab]<br>OR Apoptoses[tiab] OR Apoptosis[tiab]<br>OR Aneugen*[tiab] OR<br>Aneuploid*[tiab] OR Chromatid*[tiab]<br>OR Chromosome*[tiab] OR<br>Clastogen*[tiab] OR "DNA<br>binding"[tiab] OR DNA fragment*[tiab]<br>OR DNA damage*[tiab] OR "DNA<br>lesion"[tiab] OR "DNA lesions"[tiab] OR<br>"DNA repair*" [tiab] OR genotox*[tiab]<br>OR mutagen*[tiab] OR Mutat*[tiab] OR<br>oxidative stress*[tiab] Sort by: Most<br>Recent | <u>4,187,976</u> | Genotoxicity |
| #3     | Search: "Toxic Actions"[Mesh] OR<br>"toxicity" [Subheading] OR "Toxicity<br>Tests"[Mesh] OR "Toxicological<br>Phenomena"[Mesh] "Toxicology"[Mesh]<br>OR "adverse effects" [Subheading] OR                                                                                                                                                                                                                                                                                                                                                                                                                                                                                                                                                                                                                                                                                                                                                                                                                                                                                                                                                                                                                                                                                                                       | 16,989,269       | Toxicity     |

| Search | Query Pubmed                                                                                                                                                                                                                                                                                                                                                                                                                                                                                                                                                                                                                                                                                                                                                                                                                                                                                                                                                                                                                                                                                                                                                                                                                                                                                                                                                                                                                                                                                                                                                                                                                                                                                                                                                                                                                                                                                                                                                                                                                                                                                                                                                                                                                                                                                                                                                                                                                                                                                                                                    | Results | Comments |
|--------|-------------------------------------------------------------------------------------------------------------------------------------------------------------------------------------------------------------------------------------------------------------------------------------------------------------------------------------------------------------------------------------------------------------------------------------------------------------------------------------------------------------------------------------------------------------------------------------------------------------------------------------------------------------------------------------------------------------------------------------------------------------------------------------------------------------------------------------------------------------------------------------------------------------------------------------------------------------------------------------------------------------------------------------------------------------------------------------------------------------------------------------------------------------------------------------------------------------------------------------------------------------------------------------------------------------------------------------------------------------------------------------------------------------------------------------------------------------------------------------------------------------------------------------------------------------------------------------------------------------------------------------------------------------------------------------------------------------------------------------------------------------------------------------------------------------------------------------------------------------------------------------------------------------------------------------------------------------------------------------------------------------------------------------------------------------------------------------------------------------------------------------------------------------------------------------------------------------------------------------------------------------------------------------------------------------------------------------------------------------------------------------------------------------------------------------------------------------------------------------------------------------------------------------------------|---------|----------|
|        | <p>"chemically induced"[Subheading] OR<br/>           "Death"[Mesh] OR "Mortality"[Mesh]<br/>           OR "drug effects" [Subheading] OR<br/>           "Chemically-Induced<br/>           Disorders"[Mesh:noexp] OR "Drug-<br/>           Related Side Effects and Adverse<br/>           Reactions"[Mesh:noexp] OR "Long<br/>           Term Adverse Effects"[Mesh] OR<br/>           "Substance-Related<br/>           Disorders"[Mesh:noexp] OR<br/>           "Neurotoxins"[Mesh] OR "Nervous<br/>           System Diseases"[Mesh] OR<br/>           "Brain"[Mesh] OR<br/>           "Neuroanatomy"[Mesh] OR "Nervous<br/>           System"[Mesh] OR "Nervous System<br/>           Diseases"[Mesh] OR<br/>           "Neuropathology"[Mesh] OR<br/>           "Neurologic Manifestations"[Mesh] OR<br/>           "Neurotoxicity Syndromes"[Mesh] OR<br/>           "Neurologic Manifestations"[Mesh] OR<br/>           "Carcinogens"[Mesh:noExp] OR<br/>           "Carcinogens" [Pharmacological Action]<br/>           OR "Carcinogenicity Tests"[Mesh] OR<br/>           "Biomarkers, Tumor"[Mesh] OR<br/>           "Lymphoma"[Mesh] OR<br/>           "Neoplasms"[Mesh] OR "Cell Growth<br/>           Processes"[Mesh] OR "Allergy and<br/>           Immunology"[Mesh] OR "Immune<br/>           System"[Mesh] OR<br/>           "Immunotoxins"[Mesh] OR "Lymph<br/>           Nodes"[Mesh] OR "Lymphoid<br/>           tissue"[Mesh] OR "Spleen"[Mesh] OR<br/>           "Thymus Gland"[Mesh] OR<br/>           "Cardiotoxins"[Mesh] OR<br/>           "Cardiovascular Diseases"[Mesh] OR<br/>           "Chemical and Drug Induced Liver<br/>           Injury"[Mesh] OR "Heart"[Mesh] OR<br/>           "Kidney"[Mesh] OR "Kidney<br/>           Diseases"[Mesh] OR "Liver"[Mesh] OR<br/>           "Liver Diseases"[Mesh] OR<br/>           "Lung"[Mesh] OR "Lung<br/>           Diseases"[Mesh] OR "Urinary<br/>           Bladder"[Mesh] OR "Urinary<br/>           Tract"[Mesh] OR "abnormalities"<br/>           [Subheading] OR "Abortion,<br/>           Spontaneous"[Mesh] OR "Congenital,<br/>           Hereditary, and Neonatal Diseases and<br/>           Abnormalities"[Mesh] OR "Congenital<br/>           Abnormalities"[Mesh] OR "Embryonic<br/>           Structures"[Mesh] OR "Fetus"[Mesh]<br/>           OR "Genital Diseases, Female"[Mesh]<br/>           OR "Genital Diseases, Male"[Mesh] OR<br/>           "Maternal-Fetal Relations"[Mesh] OR<br/>           "Pregnancy"[Mesh] OR "Pregnancy</p> |         |          |



| Search | Query Pubmed                                                                                                                                                                                                                                                                                                                                                                                                                                                                                                                                                                                                                                                                                                                                                                                                                                                                                                                                                                                                                                                                                                                                                                                                                                                                                                                                                                                                                                                                                                                                                                                                                                                                                                                                                                                                                                                                                                                                                                                                                                                                                                                                                                                                                                                                                                                                                                                                                                                                                                                                                                       | Results | Comments |
|--------|------------------------------------------------------------------------------------------------------------------------------------------------------------------------------------------------------------------------------------------------------------------------------------------------------------------------------------------------------------------------------------------------------------------------------------------------------------------------------------------------------------------------------------------------------------------------------------------------------------------------------------------------------------------------------------------------------------------------------------------------------------------------------------------------------------------------------------------------------------------------------------------------------------------------------------------------------------------------------------------------------------------------------------------------------------------------------------------------------------------------------------------------------------------------------------------------------------------------------------------------------------------------------------------------------------------------------------------------------------------------------------------------------------------------------------------------------------------------------------------------------------------------------------------------------------------------------------------------------------------------------------------------------------------------------------------------------------------------------------------------------------------------------------------------------------------------------------------------------------------------------------------------------------------------------------------------------------------------------------------------------------------------------------------------------------------------------------------------------------------------------------------------------------------------------------------------------------------------------------------------------------------------------------------------------------------------------------------------------------------------------------------------------------------------------------------------------------------------------------------------------------------------------------------------------------------------------------|---------|----------|
|        | <p>Complications"[Mesh:noexp] OR<br/>           "Prenatal Injuries"[Mesh] OR "Prenatal<br/>           Exposure Delayed Effects"[Mesh] OR<br/>           "Reproduction"[Mesh:noexp] OR<br/>           "Reproductive Physiological<br/>           Phenomena"[Mesh] OR<br/>           "Spermatozoa"[Mesh] OR<br/>           "Spermatogenesis"[Mesh] OR "Sperm<br/>           Count"[Mesh] OR<br/>           "Teratogenesis"[Mesh] OR<br/>           "Teratogens"[Mesh] OR "Teratogens"<br/>           [Pharmacological Action] OR<br/>           "Teratology"[Mesh] OR "Urogenital<br/>           System"[Mesh] OR "Uterus"[Mesh] OR<br/>           "Growth and Development"[Mesh] OR<br/>           "Behavior"[Mesh:noExp] OR "Behavior,<br/>           Animal"[Mesh] OR "Behavioral<br/>           Symptoms"[Mesh] OR<br/>           "Cognition"[Mesh] OR "Cognition<br/>           Disorders"[Mesh] OR "Cognitive<br/>           Dysfunction"[Mesh] OR<br/>           "Depression"[Mesh] OR "Developmental<br/>           Biology"[Mesh] OR "Embryonic and<br/>           Fetal Development"[Mesh] OR<br/>           "Executive Function"[Mesh] OR<br/>           "Intelligence"[Mesh:NoExp] OR<br/>           "Learning"[Mesh] OR "Memory"[Mesh]<br/>           OR "Motor Activity"[Mesh] OR "Motor<br/>           Skills"[Mesh] "Morphogenesis"[Mesh]<br/>           OR "Neuropathology"[Mesh] OR<br/>           "Neurocognitive Disorders"[Mesh] OR<br/>           "Neuropsychological Tests"[Mesh] OR<br/>           "Psychomotor Disorders"[Mesh] OR<br/>           "Psychomotor Performance"[Mesh] OR<br/>           "adverse effects" [Subheading] OR<br/>           "chemically induced" [Subheading] OR<br/>           "Death"[Mesh] OR "Mortality"[Mesh]<br/>           OR "drug effects" [Subheading] OR<br/>           "Chemically-Induced<br/>           Disorders"[Mesh:noexp] OR "Drug-<br/>           Related Side Effects and Adverse<br/>           Reactions"[Mesh:noexp] OR "Long<br/>           Term Adverse Effects"[Mesh] OR<br/>           "Substance-Related<br/>           Disorders"[Mesh:noexp] OR<br/>           "Skin"[Mesh] OR "Skin diseases"[Mesh]<br/>           OR "Diabetes Mellitus"[Mesh] OR<br/>           "Glucose/metabolism"[Mesh] OR<br/>           "Glucose Metabolism<br/>           Disorders"[Mesh:noexp] OR "dose<br/>           response"[tiab] OR "dose effect*"[tiab]<br/>           OR Hypertoxic*[tiab] OR intox*[tiab]<br/>           OR lethal*[tiab] OR "No Observed<br/>           Adverse Effect Level"[tiab] OR "No</p> |         |          |

| Search | Query Pubmed                                                                                                                                                                                                                                                                                                                                                                                                                                                                                                                                                                                                                                                                                                                                                                                                                                                                                                                                                                                                                                                                                                                                                                                                                                                                                                                                                                                                                                                                                                                                                                                                                                                                                                                                                                                                                                                                                                                                                                                                                                                                                                                                                          | Results | Comments |
|--------|-----------------------------------------------------------------------------------------------------------------------------------------------------------------------------------------------------------------------------------------------------------------------------------------------------------------------------------------------------------------------------------------------------------------------------------------------------------------------------------------------------------------------------------------------------------------------------------------------------------------------------------------------------------------------------------------------------------------------------------------------------------------------------------------------------------------------------------------------------------------------------------------------------------------------------------------------------------------------------------------------------------------------------------------------------------------------------------------------------------------------------------------------------------------------------------------------------------------------------------------------------------------------------------------------------------------------------------------------------------------------------------------------------------------------------------------------------------------------------------------------------------------------------------------------------------------------------------------------------------------------------------------------------------------------------------------------------------------------------------------------------------------------------------------------------------------------------------------------------------------------------------------------------------------------------------------------------------------------------------------------------------------------------------------------------------------------------------------------------------------------------------------------------------------------|---------|----------|
|        | <p>Observed Adverse Effect Levels"[tiab]<br/> OR "No Observed Effect Level"[tiab] OR<br/> "No Observed Effect Levels"[tiab] OR<br/> "No Observable Adverse Effect<br/> Level"[tiab] OR "No Observable<br/> Adverse Effect Levels"[tiab] OR "No<br/> Observable Effect Level"[tiab] OR "No<br/> Observable Effect Levels"[tiab] OR<br/> NOAEL[tiab] OR NOAELs[tiab] OR<br/> NOEL[tiab] OR NOELs[tiab] OR<br/> Toxic*[tiab] OR Brain [tiab] OR Brains<br/> [tiab] OR Cerebellum [tiab] OR Cortex<br/> [tiab] OR Hippocamp* [tiab] OR<br/> Neurobehav* [tiab] OR<br/> ((neurologic[tiab] OR nervous[tiab])<br/> AND (disease*[tiab] OR disorder*[tiab]<br/> OR dysfunction*[tiab] OR<br/> manifestation*[tiab])) OR "nervous<br/> system*" [tiab] OR<br/> Neuroanatom*[tiab] OR<br/> neurocognit*[tiab] OR neurolog*[tiab]<br/> OR neuropath*[tiab] OR<br/> Neurotoxi*[tiab] OR Adenocar*[tiab]<br/> OR Cancer*[tiab] OR Carcino*[tiab] OR<br/> "Cell grow*" [tiab] OR Cocarcino*[tiab]<br/> OR Lymphom*[tiab] OR Neoplas*[tiab]<br/> OR Tumor*[tiab] OR Tumour*[tiab] OR<br/> Allerg*[tiab] OR Immunol*[tiab] OR<br/> Immunotox*[tiab] OR "Immune<br/> system"[tiab] OR Lymph node*[tiab]<br/> OR Lymphatic node*[tiab] OR<br/> Lymphoid tissue*[tiab] OR Lymphatic<br/> tissue*[tiab] OR Macrophage*[tiab] OR<br/> Peyer's patch*[tiab] OR Peyer<br/> patch*[tiab] OR sensitisation[tiab] OR<br/> sensitization[tiab] OR Spleen*[tiab] OR<br/> Thymic[tiab] OR Thymus[tiab] OR<br/> Bladder[tiab] OR Cardiotox*[tiab] OR<br/> Cardiomiopath*[tiab] OR<br/> Coronary[tiab] OR Heart[tiab] OR<br/> Hepati*[tiab] OR Hepato*[tiab] OR<br/> Kidney*[tiab] OR Liver[tiab] OR<br/> Lung[tiab] OR Lungs[tiab] OR<br/> Myocardit*[tiab] OR Nephropath*[tiab]<br/> OR Nephrotox*[tiab] OR<br/> Pericardit*[tiab] OR Pulmonar [tiab] OR<br/> Renal disease[tiab] OR Renal<br/> disorder[tiab] OR Renal injur*[tiab] OR<br/> Abortion*[tiab] OR Abortiv*[tiab] OR<br/> Abnormalit*[tiab] OR Congeni*[tiab]<br/> OR Embryo*[tiab] OR Fetal[tiab] OR<br/> Foetal[tiab] OR Fertility[tiab] OR<br/> Fetotoxic*[tiab] OR Foetotoxic*[tiab]<br/> OR Fetus[tiab] OR Fetuses[tiab] OR</p> |         |          |

| Search | Query Pubmed                                                                                                                                                                                                                                                                                                                                                                                                                                                                                                                                                                                                                                                                                                                                                                                                                                                                                                                                                                                                                                                                                                                                                                                                                                                                                                                                                                                                                                                                                                                                                                                                                                                                                                                                                                                                                                                                                                                                                                                                                                                                                                                                                                                                                                                                                                                                                                                                                                                                                                                                                                                                                                                                                     | Results | Comments |
|--------|--------------------------------------------------------------------------------------------------------------------------------------------------------------------------------------------------------------------------------------------------------------------------------------------------------------------------------------------------------------------------------------------------------------------------------------------------------------------------------------------------------------------------------------------------------------------------------------------------------------------------------------------------------------------------------------------------------------------------------------------------------------------------------------------------------------------------------------------------------------------------------------------------------------------------------------------------------------------------------------------------------------------------------------------------------------------------------------------------------------------------------------------------------------------------------------------------------------------------------------------------------------------------------------------------------------------------------------------------------------------------------------------------------------------------------------------------------------------------------------------------------------------------------------------------------------------------------------------------------------------------------------------------------------------------------------------------------------------------------------------------------------------------------------------------------------------------------------------------------------------------------------------------------------------------------------------------------------------------------------------------------------------------------------------------------------------------------------------------------------------------------------------------------------------------------------------------------------------------------------------------------------------------------------------------------------------------------------------------------------------------------------------------------------------------------------------------------------------------------------------------------------------------------------------------------------------------------------------------------------------------------------------------------------------------------------------------|---------|----------|
|        | <p>           Foetus[tiab] OR Foetuses[tiab] OR<br/>           Genital disease*[tiab] OR<br/>           Gestation*[tiab] OR "In utero"[tiab] OR<br/>           Infertility[tiab] OR Malformat*[tiab] OR<br/>           Miscarriage*[tiab] OR Ovary[tiab] OR<br/>           Ovari*[tiab] OR Pregnan*[tiab] OR<br/>           "Prenatal disorder*" [tiab] OR "Prenatal<br/>           exposure*" [tiab] OR "Prenatal<br/>           structure*" [tiab] OR Perinatal[tiab] OR<br/>           Postnatal[tiab] OR Reproducti*[tiab]<br/>           OR Reprotox*[tiab] OR Skin[tiab] OR<br/>           dermal[tiab] OR Sterility[tiab] OR<br/>           Sperm*[tiab] OR Teratogen*[tiab] OR<br/>           Testes[tiab] OR Testis[tiab] OR<br/>           Testicle*[tiab] OR Testicular*[tiab] OR<br/>           Thyroid*[tiab] OR Thyrotox*[tiab] OR<br/>           Urogenital disease*[tiab] OR<br/>           Uterus[tiab] OR Development*[tiab]<br/>           OR "behavioural"[tiab] OR<br/>           "behavioral"[tiab] OR<br/>           ((Behaviour*[tiab] OR Behavior*[tiab])<br/>           AND (animal*[tiab] OR human*[tiab]<br/>           OR pup[tiab] OR litter[tiab] OR<br/>           child*[tiab] OR adult*[tiab])) OR<br/>           Cognition*[tiab] OR Cognitiv*[tiab] OR<br/>           Comprehensi*[tiab] OR<br/>           Depressi*[tiab] OR DNT[tiab] OR<br/>           developmental[tiab] OR<br/>           (Development*[tiab] AND<br/>           (animal*[tiab] OR human*[tiab] OR<br/>           pup[tiab] OR litter[tiab] OR child*[tiab]<br/>           OR adult*[tiab])) OR (Executive[tiab]<br/>           AND (contro[tiab]   OR function*[tiab]<br/>           OR dysfunction*[tiab] OR<br/>           impair*[tiab])) OR intelligence[tiab] OR<br/>           Learning[tiab] OR Locomotor*[tiab] OR<br/>           (memor*[tiab] AND (disorder*[tiab]<br/>           OR dysfunction*[tiab] OR<br/>           impair*[tiab])) OR metamemory*[tiab]<br/>           OR Ontogen*[tiab] OR<br/>           Organogene*[tiab] OR<br/>           Neurocognitive*[tiab] OR<br/>           Neuropsycholog*[tiab] OR<br/>           neurodevelopment*[tiab] OR placental<br/>           barrier*[tiab] OR "adverse<br/>           effect*" [tiab] OR "adverse health<br/>           effect*" [tiab] OR "adverse<br/>           reaction" [tiab] OR Death*[tiab] OR<br/>           Dead[tiab] OR "Fatal outcome" [tiab]<br/>           OR Mortalit*[tiab] OR diabet*[tiab] OR<br/>           "glucose homeostasis" [tiab] OR<br/>           "glucose homeostasis" [tiab] OR<br/>           (glucose[tiab] AND<br/>           metabolism*[tiab]) Sort by: Most         </p> |         |          |

| Search | Query Pubmed                                                                                                                                                                                                                                                                                                                                                                                                                                                                                                                                                                                                                                                                                                                                                                                                                                                                                                                                                                                                                                     | Results           | Comments |
|--------|--------------------------------------------------------------------------------------------------------------------------------------------------------------------------------------------------------------------------------------------------------------------------------------------------------------------------------------------------------------------------------------------------------------------------------------------------------------------------------------------------------------------------------------------------------------------------------------------------------------------------------------------------------------------------------------------------------------------------------------------------------------------------------------------------------------------------------------------------------------------------------------------------------------------------------------------------------------------------------------------------------------------------------------------------|-------------------|----------|
|        | Recent                                                                                                                                                                                                                                                                                                                                                                                                                                                                                                                                                                                                                                                                                                                                                                                                                                                                                                                                                                                                                                           |                   |          |
| #2     | Search: ("Biological Transport"[Mesh] OR "Pharmacokinetics"[Mesh] OR "Toxicokinetics"[Mesh] OR "pharmacokinetics" [Subheading] OR "metabolism"[Subheading] OR ADME[tiab] OR accumulat*[tiab] OR bioavail*[tiab] OR bioconcentr*[tiab] OR biodistribut*[tiab] OR "biologic avail*" [tiab] OR biotrans*[tiab] OR clearance*[tiab] OR degrad*[tiab] OR detox*[tiab] OR distribut*[tiab] OR dosim*[tiab] OR eliminat*[tiab] OR excret*[tiab] OR kinetic*[tiab] OR metaboli*[tiab] OR "mode of action"[tiab] OR "mechanism of action"[tiab] OR pharmacokinetic*[tiab] OR PBPK[tiab] OR "pb pk"[tiab] OR PBTK[tiab] OR "pb tk"[tiab] OR "pk model*" [tiab] OR "tk model*" [tiab] OR reabsor*[tiab] OR retain*[tiab] OR retention*[tiab] OR secrete*[tiab] OR secretion*[tiab] OR toxicokinetic*[tiab] OR transport*[tiab] OR uptake*[tiab] OR urinat*[tiab] OR ((absorb[tiab] OR absorbs[tiab] OR absorbed[tiab] OR absorption*[tiab] OR deposit*[tiab]) NOT (atomic[tiab] OR optical[tiab] OR spectra*[tiab] OR spectros*[tiab] OR spectrum*[tiab] OR | <u>10,425,664</u> | ADME     |
| #1     | Search: "Arsenic"[Mesh] OR "arsenite" [Supplementary Concept] OR "Arsenites"[Mesh] OR "dimethylarsinous acid" [Supplementary Concept] OR "monomethylarsonic acid" [Supplementary Concept] OR "methylarsonite" [Supplementary Concept] OR "thio-dimethylarsinate" [Supplementary Concept] OR 7440-38-2[rn] OR 15584-04-0[rn] OR 15132-04-4[rn] OR 51952-65-9[rn] OR 25400-23-1[rn] OR arsenic[tiab] OR arsenate[tiab] OR arsenite[tiab] OR "as III"[tiab] OR "as V"[tiab] OR asiii[tiab] OR asV[tiab] OR iAs[tiab] OR Dimethylarsinate[tiab] OR Dimethylarsinite[tiab] OR Methylarsonate[tiab] OR Methylarsonite[tiab] OR Thio-dimethylarsinate[tiab] OR "DMA III"[tiab] OR dmaIII[tiab] OR "Thio DMA"[tiab] OR "Dimethyl arsenic                                                                                                                                                                                                                                                                                                                 | <u>43,920</u>     | Arsenic  |

| Search | Query Pubmed                                                                                                                                                                                                                                                           | Results | Comments |
|--------|------------------------------------------------------------------------------------------------------------------------------------------------------------------------------------------------------------------------------------------------------------------------|---------|----------|
|        | acid"[tiab] OR "Methyl arsenic acid"[tiab] OR "MA III"[tiab] OR MAIII[tiab] OR "dimethylarsinous acid"[tiab] OR "monomethylarsonic acid"[tiab] OR 7440-38-2[tiab] OR 15584-04-0[tiab] OR 15132-04-4[tiab] OR 51952-65-9[tiab] OR 25400-23-1[tiab] Sort by: Most Recent |         |          |

## B.2. Search epigenetic studies, 22<sup>th</sup> September 2021

| Search | Query                                                                                                                                                                                                                                                                                                                                                                                                                                                                                                                                                                             | Results          | Comments                             |
|--------|-----------------------------------------------------------------------------------------------------------------------------------------------------------------------------------------------------------------------------------------------------------------------------------------------------------------------------------------------------------------------------------------------------------------------------------------------------------------------------------------------------------------------------------------------------------------------------------|------------------|--------------------------------------|
| #1     | TS=(Dimethylarsinate OR Dimethylarsinite OR Methylarsonate OR Methylarsonite OR "Arsenic" OR "arsenite" OR "Arsenites" OR arsenic OR arsenate OR arsenite OR Thio-dimethylarsinate OR "Dimethyl arsenic acid" OR "Methyl arsenic acid" OR "dimethylarsinous acid" OR "monomethylarsonic acid")                                                                                                                                                                                                                                                                                    | <u>72,185</u>    | MAIN SEARCH<br>WOS                   |
| #2     | TS=(Cavia OR Cricetinae OR Cricetus OR "guinea pig" OR "guinea pigs" OR Hamster* OR Mice OR Mouse OR Muridae OR Murinae OR Murine OR Mus OR Rat OR Rats OR Rattus OR Rodent*)                                                                                                                                                                                                                                                                                                                                                                                                     | <u>2,518,196</u> | LAB ANIMALS<br>WOS                   |
| #3     | TS=("epigen*" OR "transgeneration*")                                                                                                                                                                                                                                                                                                                                                                                                                                                                                                                                              | <u>184,291</u>   | WOS                                  |
|        | #1 AND #2 AND #3                                                                                                                                                                                                                                                                                                                                                                                                                                                                                                                                                                  | <u>178</u>       | Results of<br>interest for<br>WOS    |
| #4     | Dimethylarsinate [Title/Abstract] OR Dimethylarsinite [Title/Abstract] OR Methylarsonate [Title/Abstract] OR Methylarsonite [Title/Abstract] OR "Arsenic" [Title/Abstract] OR "arsenite" [Title/Abstract] OR "Arsenites" [Title/Abstract] OR arsenic [Title/Abstract] OR arsenate [Title/Abstract] OR arsenite [Title/Abstract] OR Thio-dimethylarsinate [Title/Abstract] OR "Dimethyl arsenic acid" [Title/Abstract] OR "Methyl arsenic acid" [Title/Abstract] OR "dimethylarsinous acid" [Title/Abstract] OR "monomethylarsonic acid"[Title/Abstract] Filters: from 2010 – 2021 | <u>20,070</u>    | MAIN SEARCH<br>PUBMED                |
| #5     | Cavia [Title/Abstract] OR Cricetinae [Title/Abstract] OR Cricetus [Title/Abstract] OR "guinea pig" [Title/Abstract] OR "guinea pigs" [Title/Abstract] OR Hamster* [Title/Abstract] OR Mice [Title/Abstract] OR Mouse [Title/Abstract] OR Muridae [Title/Abstract] OR Murinae [Title/Abstract] OR Murine [Title/Abstract] OR Mus [Title/Abstract] OR Rat [Title/Abstract] OR Rats [Title/Abstract] OR Rattus [Title/Abstract] OR Rodent*[Title/Abstract] Filters: from 2010 – 2022                                                                                                 | <u>1,048,056</u> | LAB ANIMALS<br>PUBMED                |
| #6     | "epigen*" [Title/Abstract] OR "transgeneration*" [Title/Abstract] Filters: from 2010 - 2022                                                                                                                                                                                                                                                                                                                                                                                                                                                                                       | <u>89,063</u>    | PUBMED                               |
|        | #4 AND #5 AND #6                                                                                                                                                                                                                                                                                                                                                                                                                                                                                                                                                                  | <u>54</u>        | Results of<br>interest for<br>PUBMED |
