# Supplementary material for: Update of the risk assessment of inorganic arsenic in food
Source: PubMed Central journal article supplement (PMC10794945; doi:10.2903/j.efsa.2024.8488), 2024-01-18
Supplement: EFS2-22-e8488-s004.pdf [file EFS2-22-e8488-s004.pdf]

Annex to: Update of the risk assessment of inorganic arsenic in food.  
doi:10.2903/j.efsa.2024.8488

© European Food Safety Authority, 2024

## **Annex E1 Benchmark dose modelling reports**

### **Relative increase of the background incidence after adjustment for confounders by 5%<sup>1</sup>**

Annex E1 provides a comprehensive overview of the benchmark dose (BMD) analyses carried out for the critical studies, employing the model averaging technique. The BMD analyses were conducted in accordance with the EFSA BMD guidance (EFSA Scientific Committee, 2022).

#### **E1.1 Selection of the BMR**

The BMD is identified as the specific dose that corresponds to the desired BMR level. To assess the uncertainty associated with the BMD, a 90% confidence interval is estimated, with the lower bound denoted as BMDL and the upper bound as BMDU. The BMDL and BMDU values help to quantify the range within which the true BMD value is expected to lie.

As BMR the CONTAM Panel decided to use a relative increase of the background incidence after adjustment for confounders by 5%<sup>1</sup>.

#### **E1.2 Software Used**

Results are obtained using the EFSA web-tool for Bayesian BMD analysis, which uses the R-package [BMABMDR] version 0.0.0.9057/0.0.0.9060/0.0.0.9073 for the underlying calculations.

---

<sup>1</sup> Exceptions: For continuous endpoints including the studies of Parvez et al. (2013) on FEV1 and FVC, Siddique et al. (2020) on FEV1 and FEV6 and Vahter et al. (2020), an extra risk of 5% was applied.

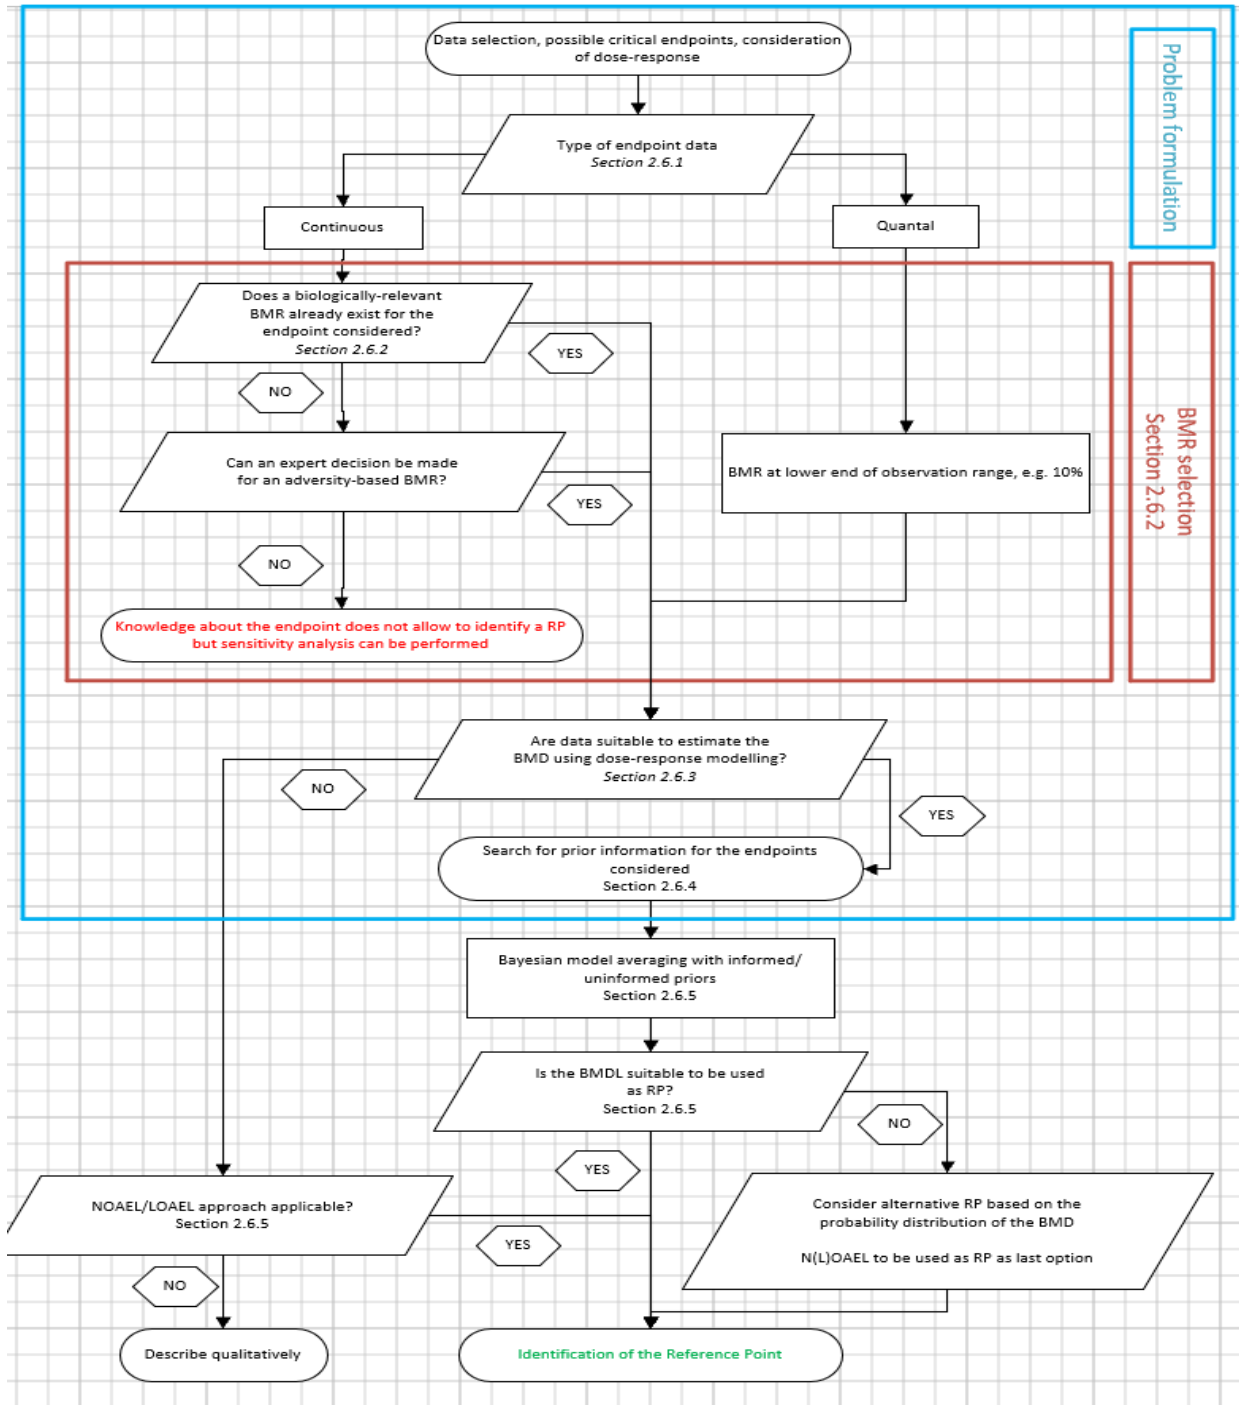

Flowchart to derive a Reference Point (RP) from a dose-response dataset of a specified endpoint, using BMD analysis. Figure from EFSA BMD guidance (EFSA Scientific Committee, 2022).

### E1.3 BMD modelling reports

#### Ahsan et al. (2006) skin lesions, relative BMR 5%

##### Data Description

The endpoint to be analyzed is: Adj.cases for skin lesions

Data used for analysis:

| Exposure.µg.kg.bw.per.day | Adj.cases | N    |
|---------------------------|-----------|------|
| 1.22                      | 51        | 2259 |
| 2.76                      | 90        | 2122 |
| 5.60                      | 143       | 2202 |
| 10.18                     | 171       | 2185 |
| 19.64                     | 239       | 2183 |

The 'Value for CES' is set to 0.00115489.

Extended dose range is applied.

Informative background prior: min: 0.02144754; the most likely: 0.02257636; max: 0.02370518. Shape parameter is applied.

The 'Sampling Method' is set to Bridge Sampling.

##### Results

*Information pertaining to this endpoint.*

##### Goodness of Fit

Best fitting model fits sufficiently well (Bayes factor is 2.43e-03).

##### Model Averaged BMD

| Model          | Type | BMDL  | BMD   | BMDU  |
|----------------|------|-------|-------|-------|
| Model Averaged | BS   | 0.083 | 0.308 | 0.597 |

##### Estimated BMDs per model

| Model | BMDL  | BMD     | BMDU    | Model Weights | Converged |
|-------|-------|---------|---------|---------------|-----------|
| E4_Q  | 0.047 | 0.107   | 0.206   | 0.081         | 1         |
| IE4_Q | 0.252 | 0.419   | 0.652   | 0.497         | 1         |
| H4_Q  | 0.055 | 0.117   | 0.225   | 0.108         | 1         |
| LN4_Q | 0.137 | 0.258   | 0.428   | 0.262         | 1         |
| G4_Q  | 0.065 | 105.978 | 300.296 | 0.001         | 0         |
| QE4_Q | 0.198 | 0.218   | 0.247   | 0.048         | 1         |
| P4_Q  | 0.011 | 0.033   | 0.075   | 0.002         | 1         |
| L4_Q  | 0.008 | 0.024   | 0.058   | 0.001         | 1         |

### Plots of Fitted Models

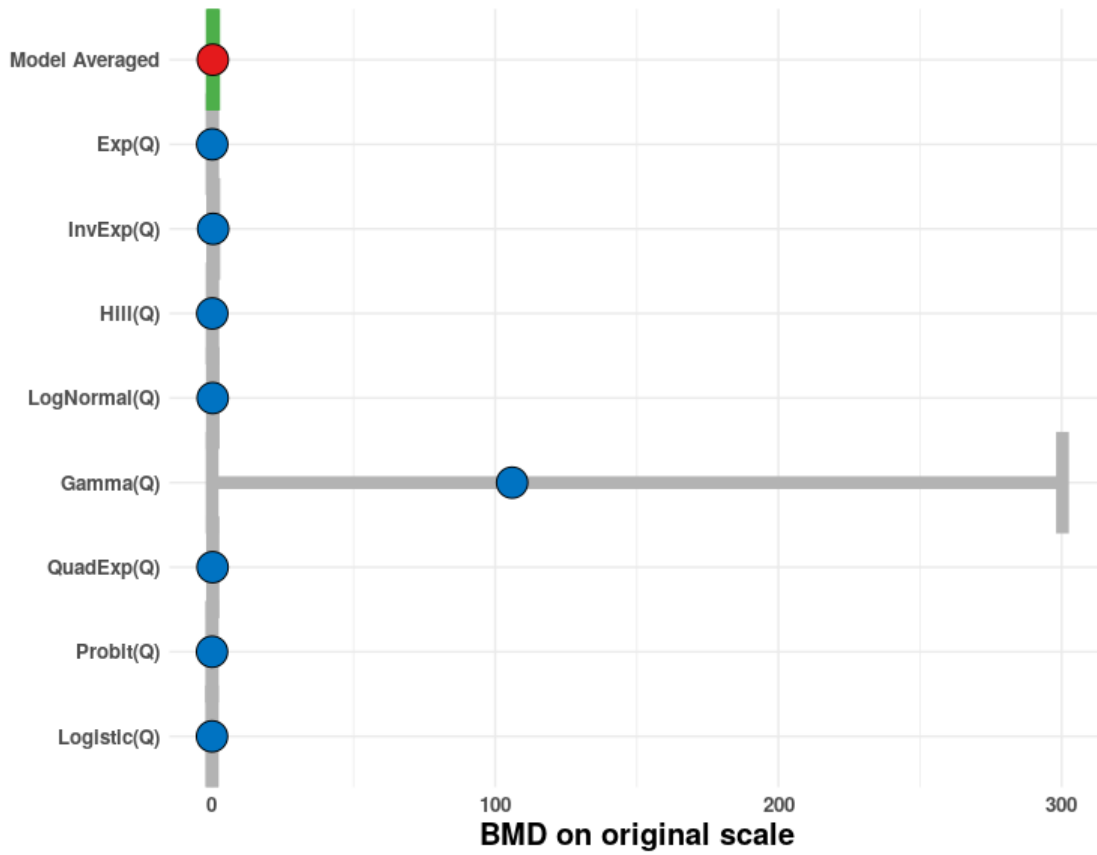

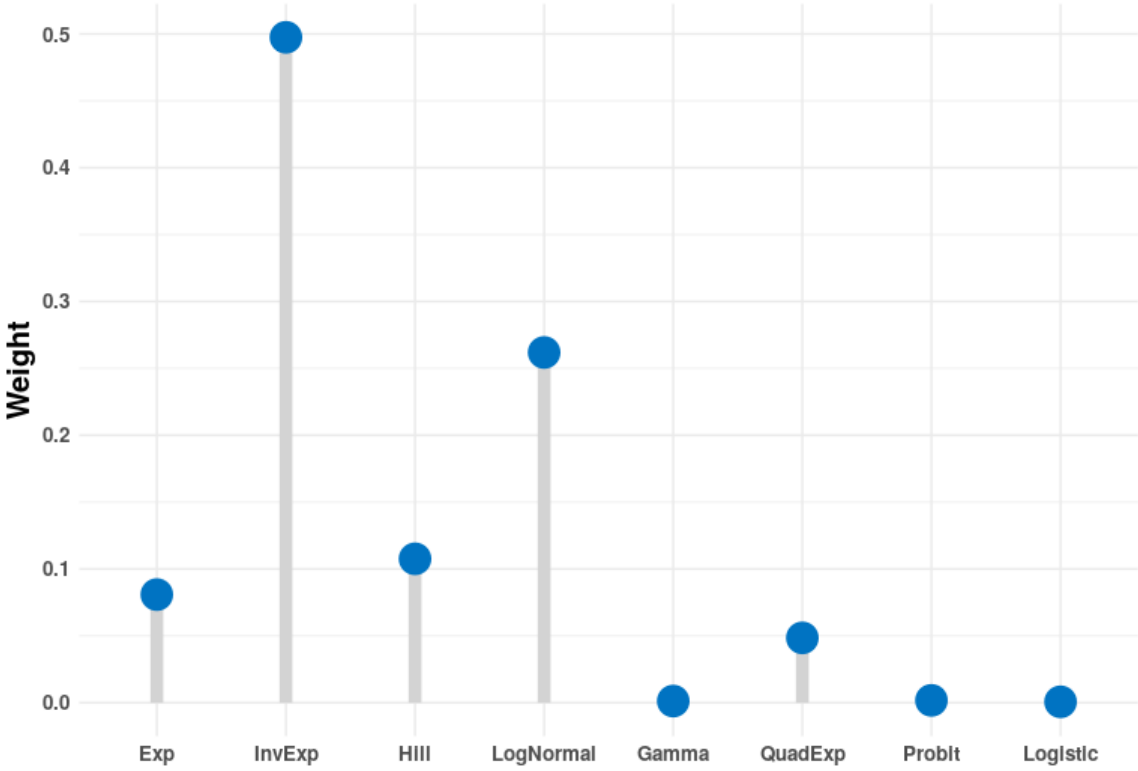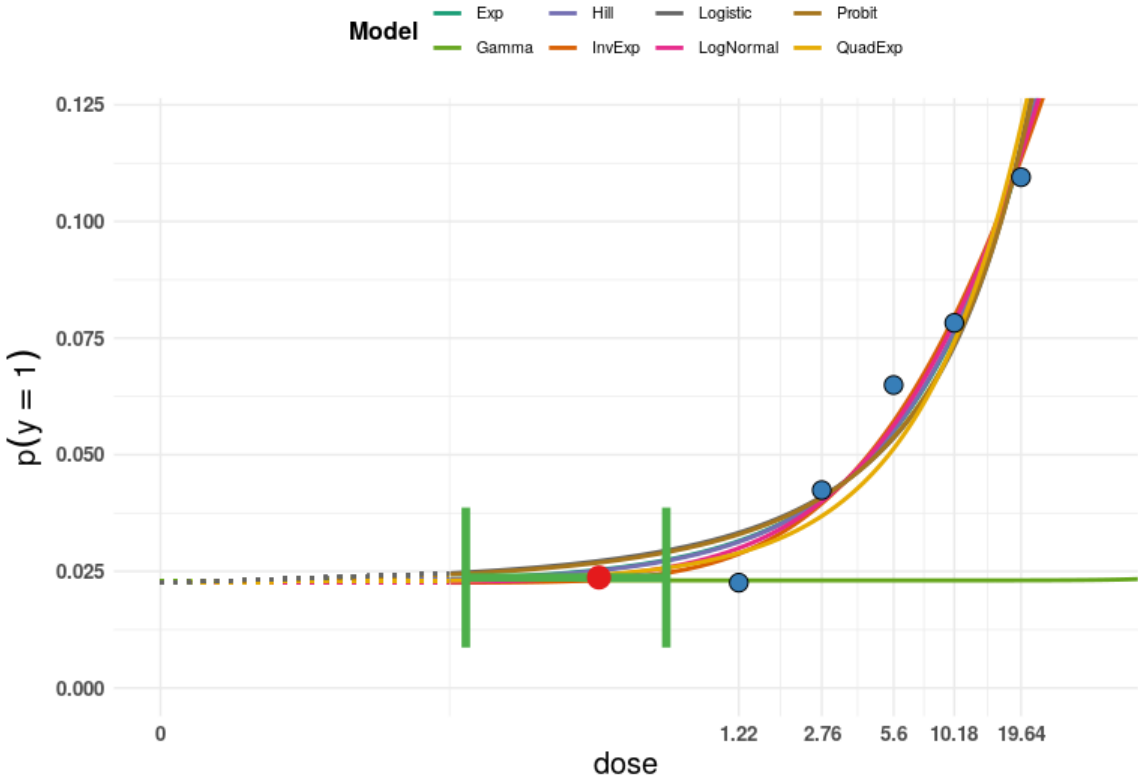

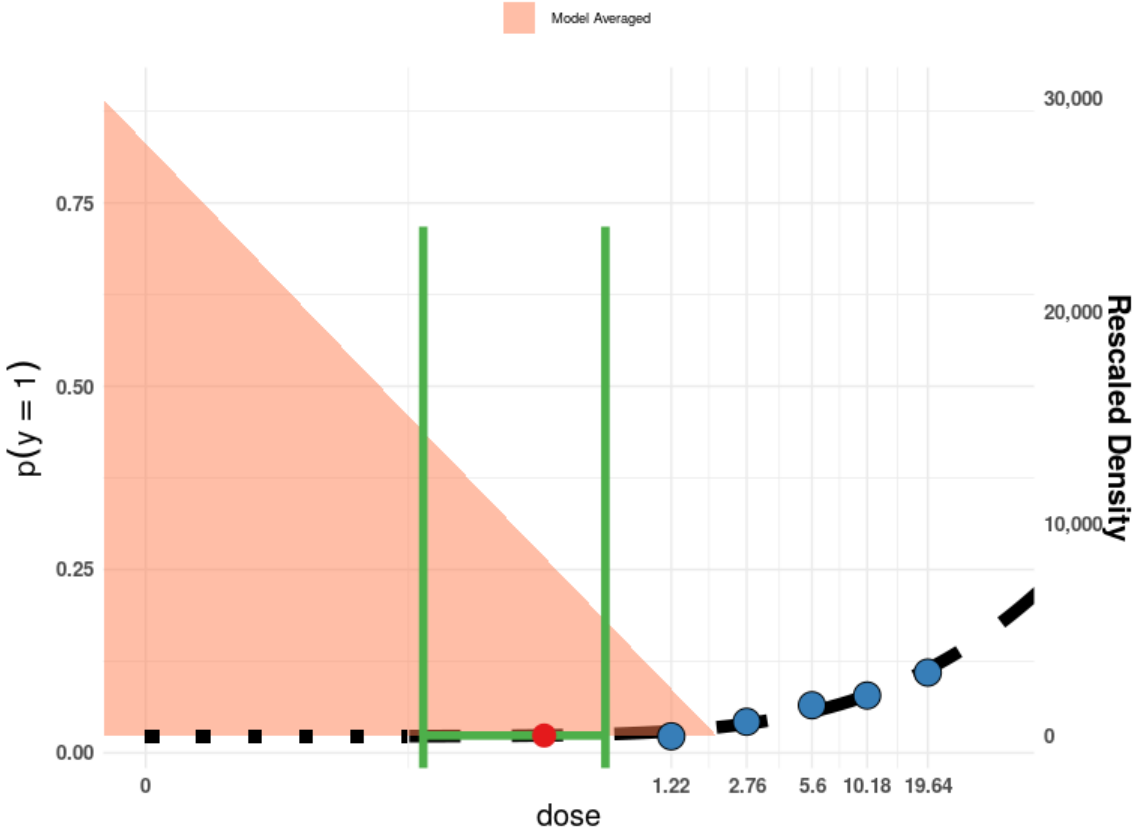

## Chen et al. (2010a) lung cancer, relative BMR 5%

### Data Description

The endpoint to be analyzed is: Adj.cases for lung cancer

Data used for analysis:

| Exposure.µg.kg.bw.per.day | Adj.cases | N    |
|---------------------------|-----------|------|
| 0.927                     | 48        | 2288 |
| 2.288                     | 48        | 2093 |
| 4.743                     | 19        | 907  |
| 11.561                    | 29        | 909  |
| 17.018                    | 33        | 691  |

The 'Value for CES' is set to 0.00107143.

Extended dose range is not applied.

Informative background prior: min: 0.02076923; the most likely: 0.02097902; max: 0.02118881. Shape parameter is applied.

The 'Sampling Method' is set to Bridge Sampling.

### Results

*Information pertaining to this endpoint.*

### Goodness of Fit

Best fitting model fits sufficiently well (Bayes factor is 1.93e-04).

### Model Averaged BMD

| Model          | Type | BMDL | BMD   | BMDU   |
|----------------|------|------|-------|--------|
| Model Averaged | BS   | 1.21 | 4.969 | 10.797 |

### Estimated BMDs per model

| Model | BMDL  | BMD   | BMDU   | Model Weights | Converged |
|-------|-------|-------|--------|---------------|-----------|
| E4_Q  | 1.568 | 5.121 | 9.977  | 0.141         | 1         |
| IE4_Q | 3.395 | 8.038 | 14.312 | 0.081         | 1         |
| H4_Q  | 1.678 | 5.072 | 10.110 | 0.140         | 1         |
| LN4_Q | 2.763 | 6.980 | 12.204 | 0.114         | 1         |
| G4_Q  | 1.479 | 5.237 | 9.803  | 0.168         | 1         |
| QE4_Q | 0.895 | 1.764 | 3.404  | 0.135         | 1         |
| P4_Q  | 1.474 | 4.910 | 10.088 | 0.111         | 1         |
| L4_Q  | 1.329 | 4.969 | 10.032 | 0.109         | 1         |

**Plots of Fitted Models**

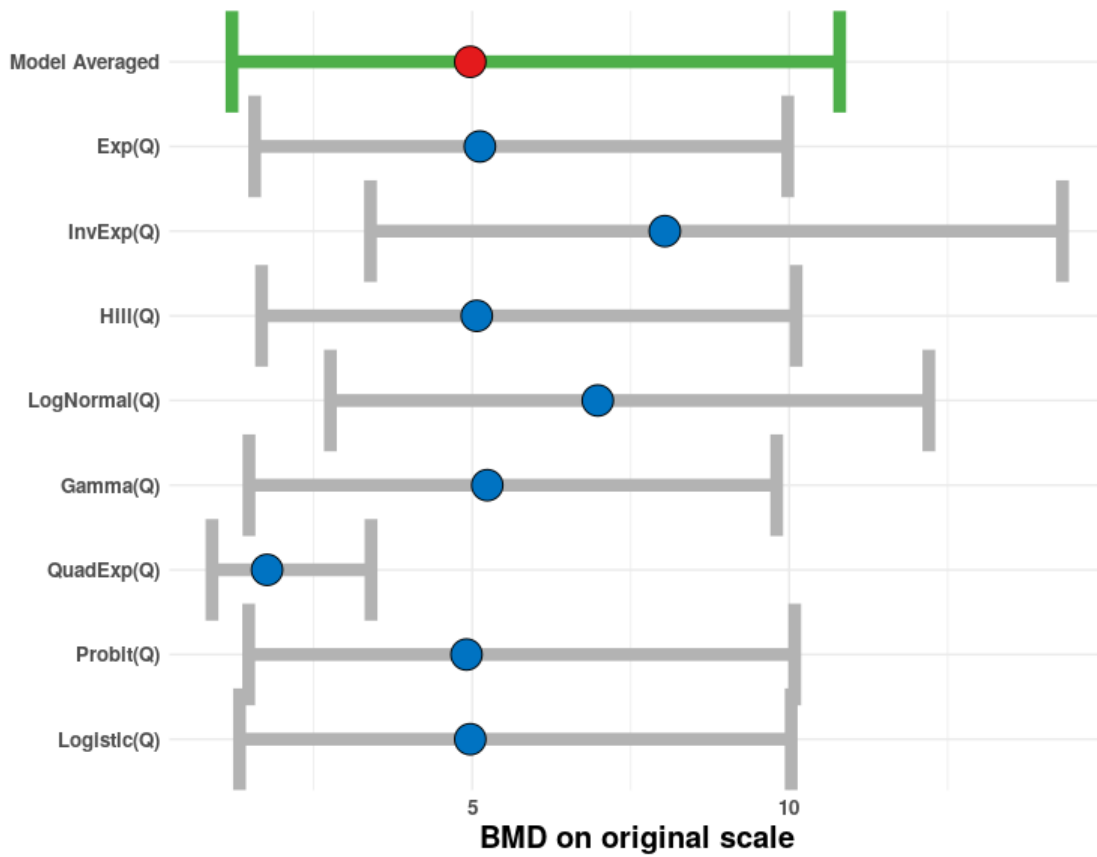



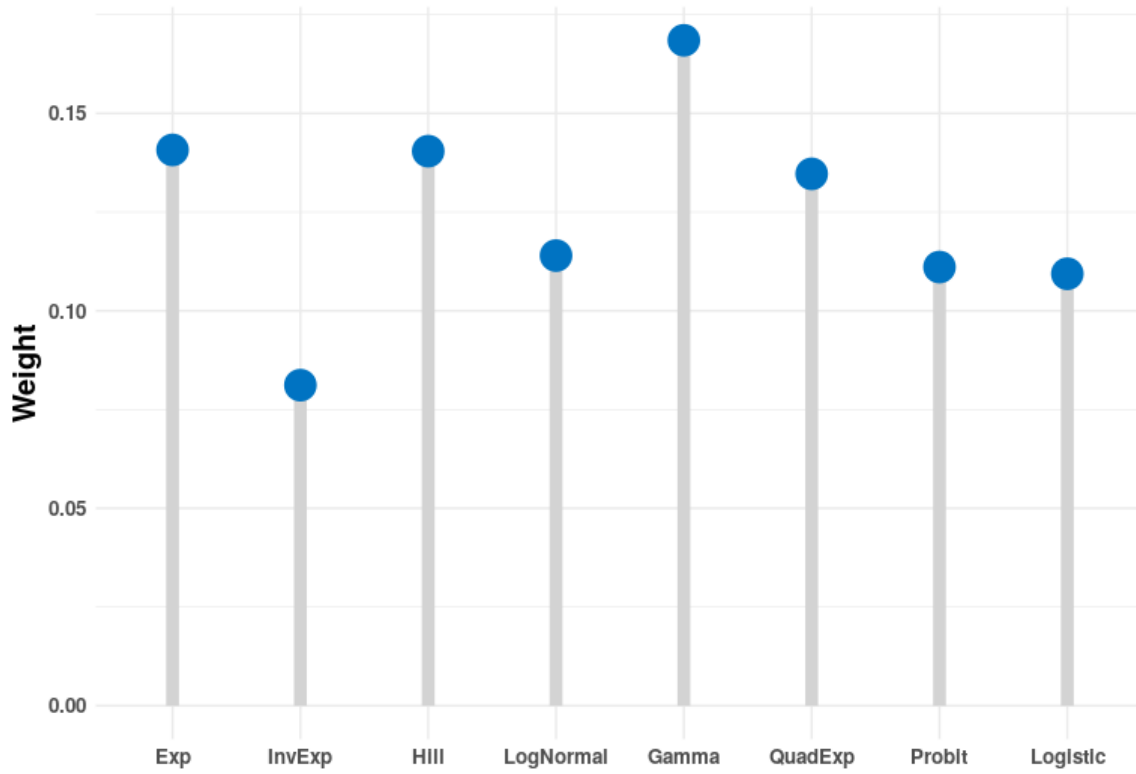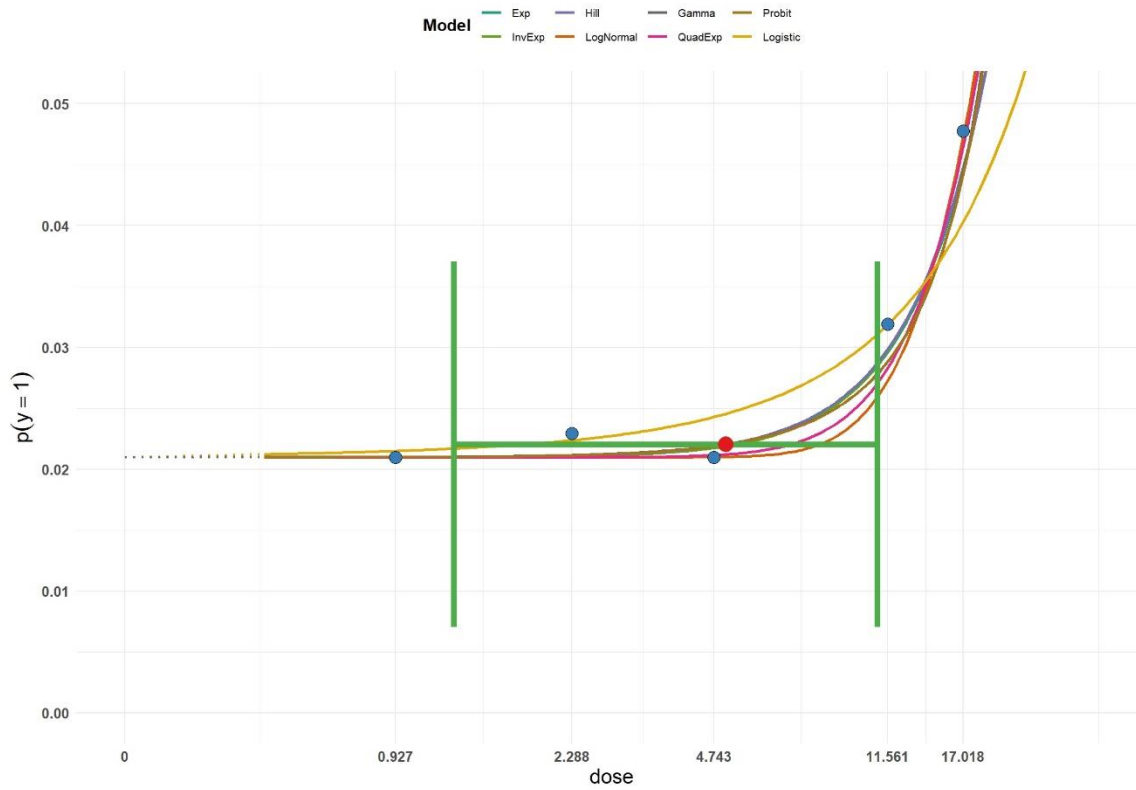

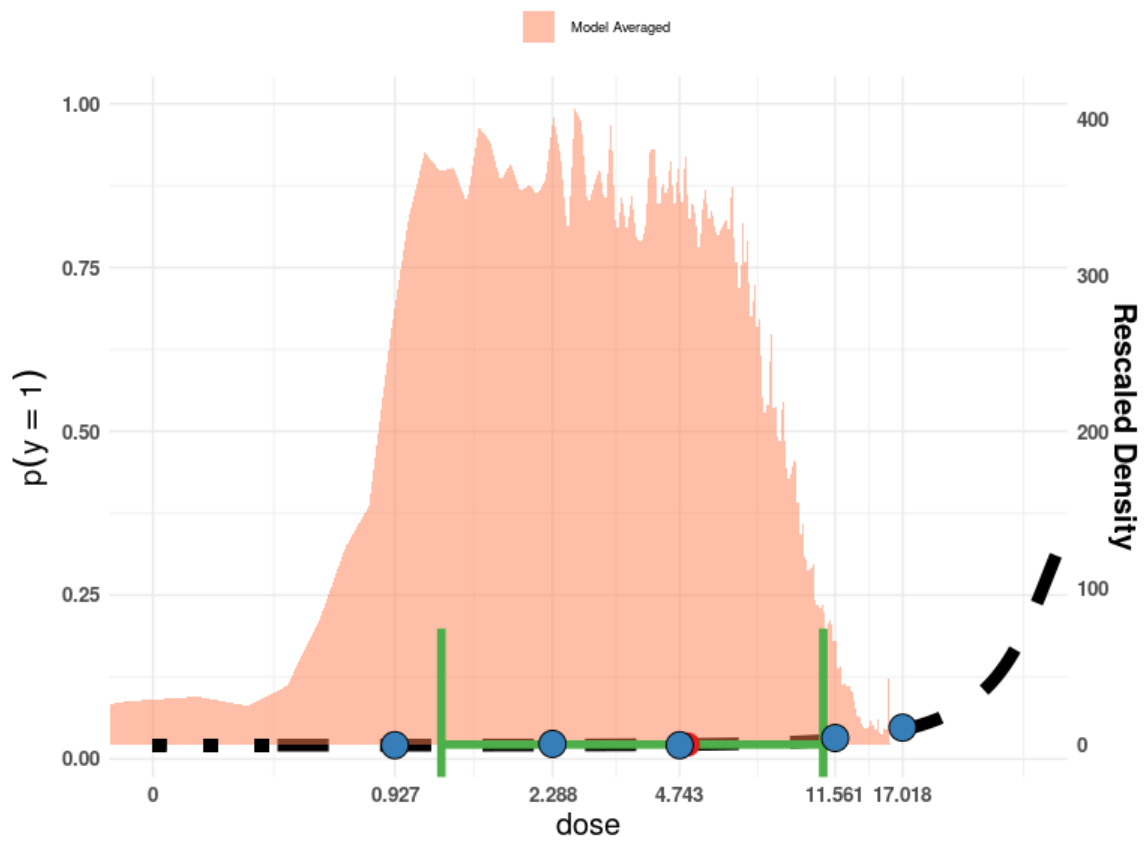

## Chen et al. (2010b) bladder cancer, relative BMR 5%

### Data Description

The endpoint to be analyzed is: Adj.cases for bladder cancer

Data used for analysis:

| Exposure.µg.kg.bw.per.day | Adj.cases | N    |
|---------------------------|-----------|------|
| 0.927                     | 3         | 2288 |
| 2.288                     | 5         | 2093 |
| 4.743                     | 3         | 907  |
| 11.561                    | 7         | 909  |
| 17.018                    | 11        | 691  |

The 'Value for CES' is set to 6.565e-05.

Extended dose range is not applied.

Informative background prior: min: 0.00111451; the most likely: 0.00131119; max: 0.00150787. Shape parameter is applied.

The 'Sampling Method' is set to Bridge Sampling.

### Results

*Information pertaining to this endpoint.*

### Goodness of Fit

Best fitting model fits sufficiently well (Bayes factor is 2.59e-04).

### Model Averaged BMD

| Model          | Type | BMDL  | BMD   | BMDU  |
|----------------|------|-------|-------|-------|
| Model Averaged | BS   | 0.147 | 1.325 | 5.456 |

### Estimated BMDs per model

| Model | BMDL  | BMD   | BMDU  | Model Weights | Converged |
|-------|-------|-------|-------|---------------|-----------|
| E4_Q  | 0.287 | 1.465 | 4.792 | 0.173         | 1         |
| IE4_Q | 0.952 | 3.829 | 7.490 | 0.064         | 1         |
| H4_Q  | 0.270 | 1.481 | 4.881 | 0.170         | 1         |
| LN4_Q | 0.539 | 2.761 | 6.486 | 0.121         | 1         |
| G4_Q  | 0.294 | 1.605 | 5.047 | 0.210         | 1         |
| QE4_Q | 0.102 | 0.221 | 0.617 | 0.168         | 1         |
| P4_Q  | 0.127 | 1.069 | 4.564 | 0.053         | 1         |
| L4_Q  | 0.142 | 1.011 | 4.080 | 0.042         | 1         |

**Plots of Fitted Models**

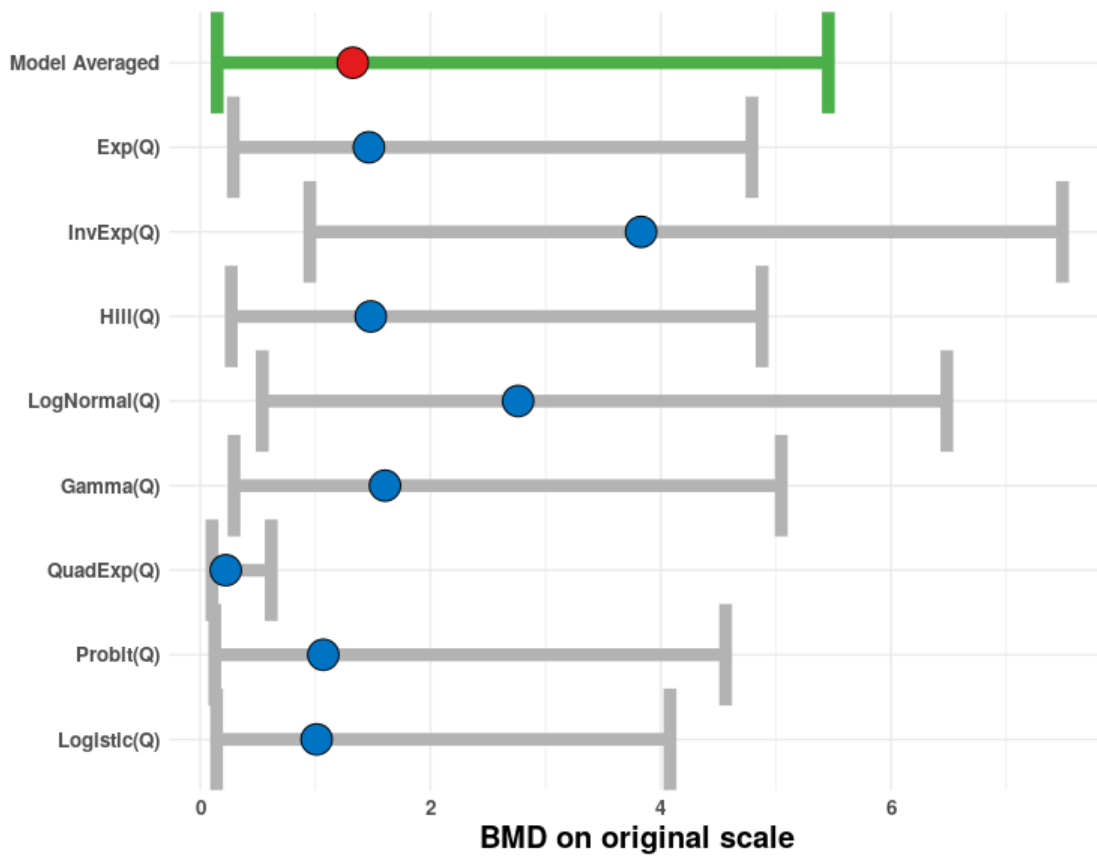

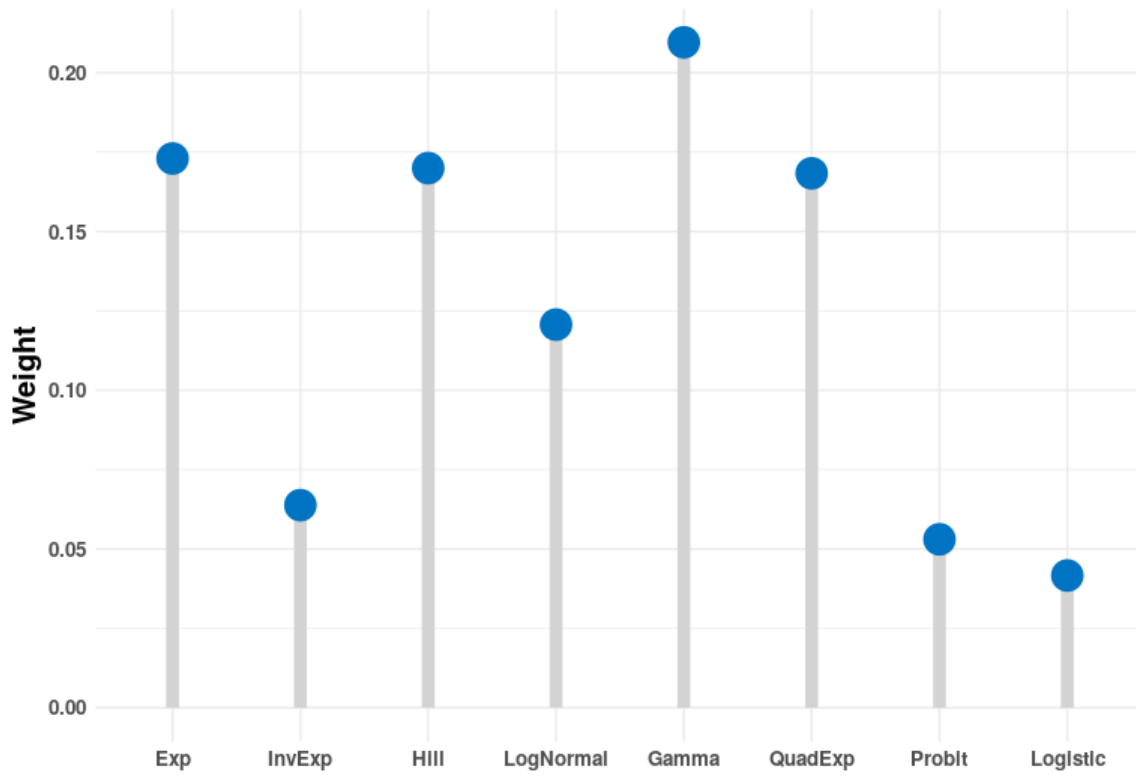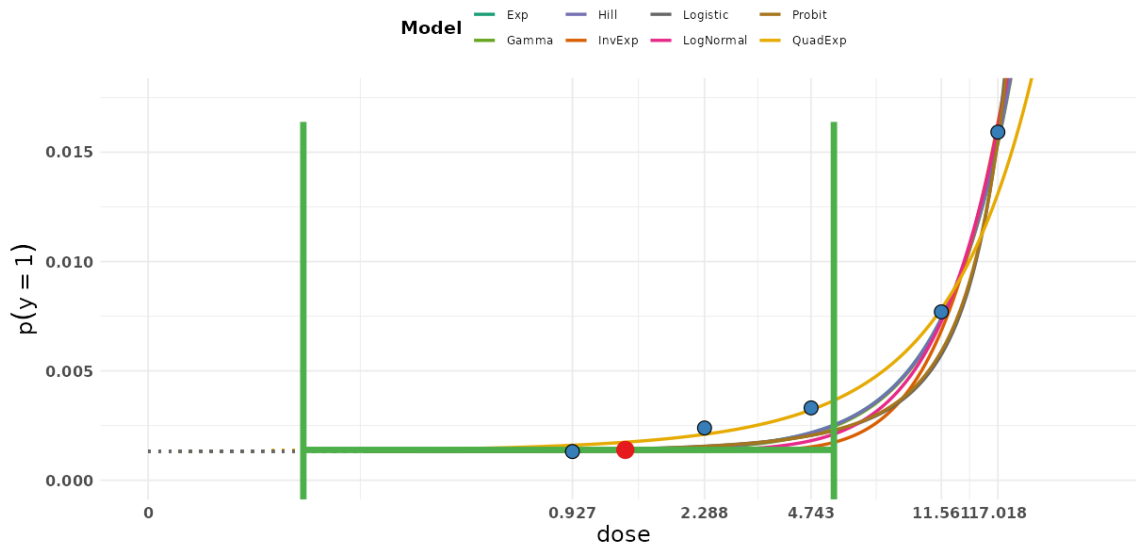

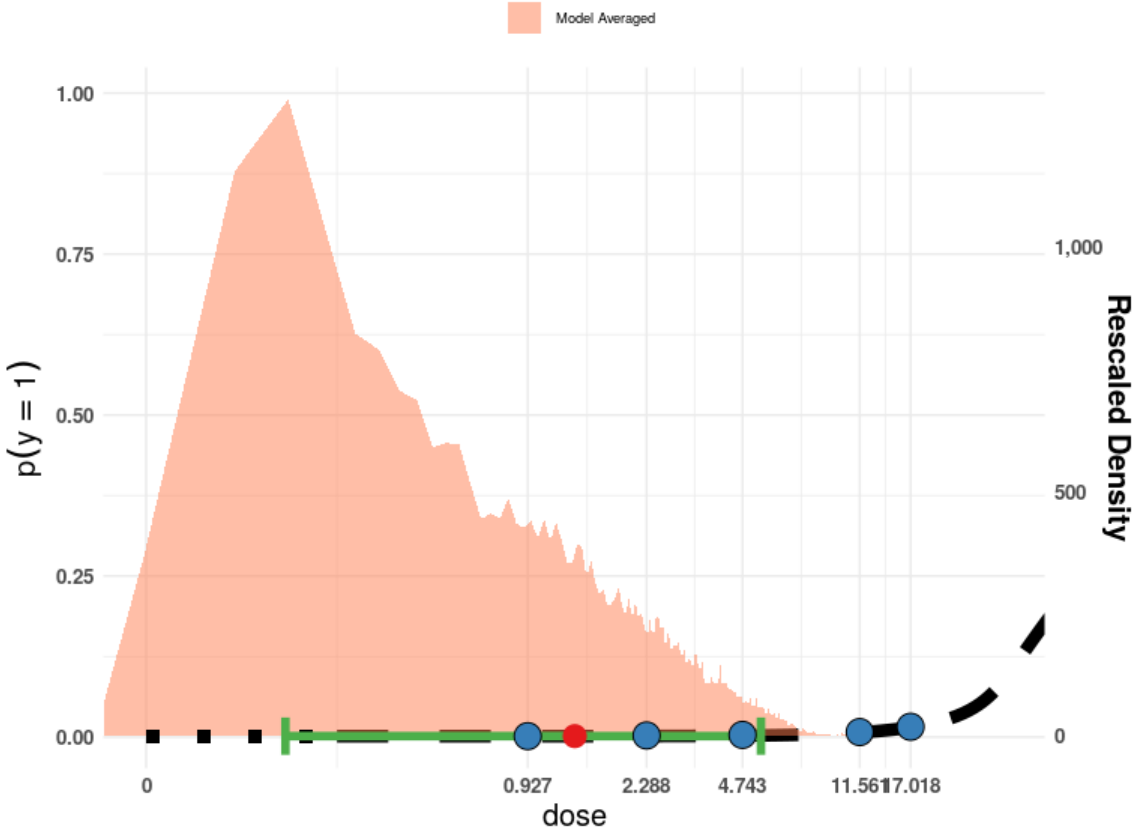

## Chen et al. (2010b) bladder cancer, relative BMR 5%

### Sensitivity analysis: The highest exposure point estimate doubled

#### Data Description

The endpoint to be analyzed is: Adj.cases for bladder cancer

Data used for analysis:

| Exposure.µg.kg.bw.per.day | Adj.cases | N    |
|---------------------------|-----------|------|
| 0.927                     | 3         | 2288 |
| 2.288                     | 5         | 2093 |
| 4.743                     | 3         | 907  |
| 11.561                    | 7         | 909  |
| 33.382                    | 11        | 691  |

The 'Value for CES' is set to 6.565e-05.

Extended dose range is not applied.

Informative background prior: min: 0.00111451; the most likely: 0.00131119; max: 0.00150787. Shape parameter is applied.

The 'Sampling Method' is set to Bridge Sampling.

#### Results

*Information pertaining to this endpoint.*

#### Goodness of Fit

Best fitting model fits sufficiently well (Bayes factor is 2.24e-04).

#### Model Averaged BMD

| Model          | Type | BMDL  | BMD   | BMDU  |
|----------------|------|-------|-------|-------|
| Model Averaged | BS   | 0.117 | 0.358 | 2.759 |

#### Estimated BMDs per model

| Model | BMDL  | BMD   | BMDU  | Model Weights | Converged |
|-------|-------|-------|-------|---------------|-----------|
| E4_Q  | 0.091 | 0.606 | 3.098 | 0.140         | 1         |
| IE4_Q | 0.389 | 1.546 | 6.102 | 0.032         | 1         |
| H4_Q  | 0.093 | 0.576 | 3.182 | 0.139         | 1         |
| LN4_Q | 0.225 | 1.073 | 4.831 | 0.073         | 1         |
| G4_Q  | 0.104 | 0.631 | 3.048 | 0.150         | 1         |
| QE4_Q | 0.124 | 0.226 | 0.680 | 0.434         | 1         |
| P4_Q  | 0.037 | 0.498 | 6.290 | 0.019         | 1         |
| L4_Q  | 0.031 | 0.466 | 5.029 | 0.013         | 1         |

**Plots of Fitted Models**

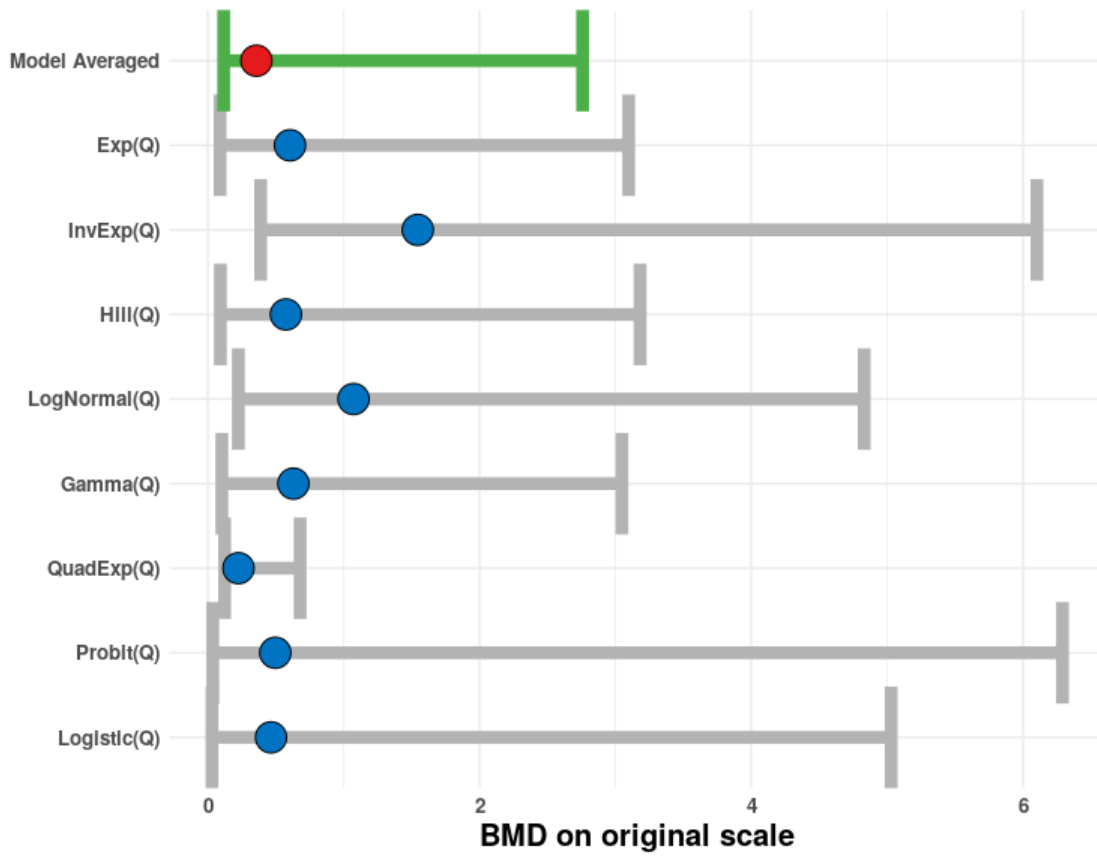



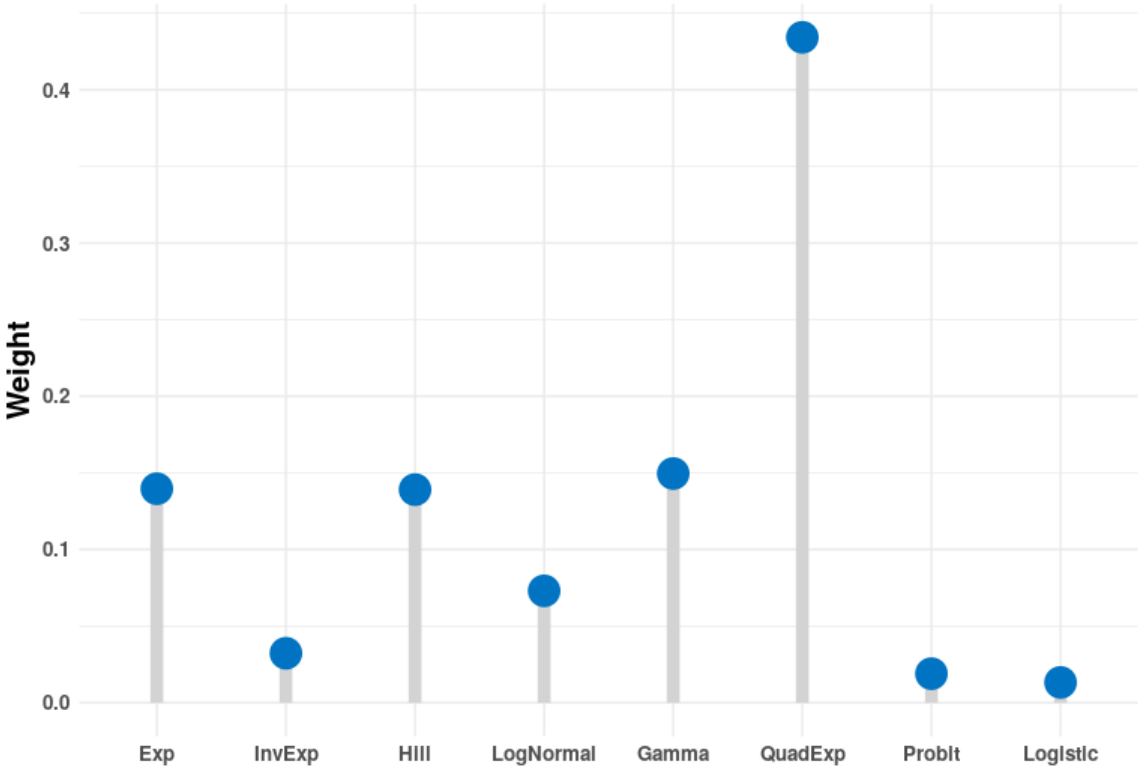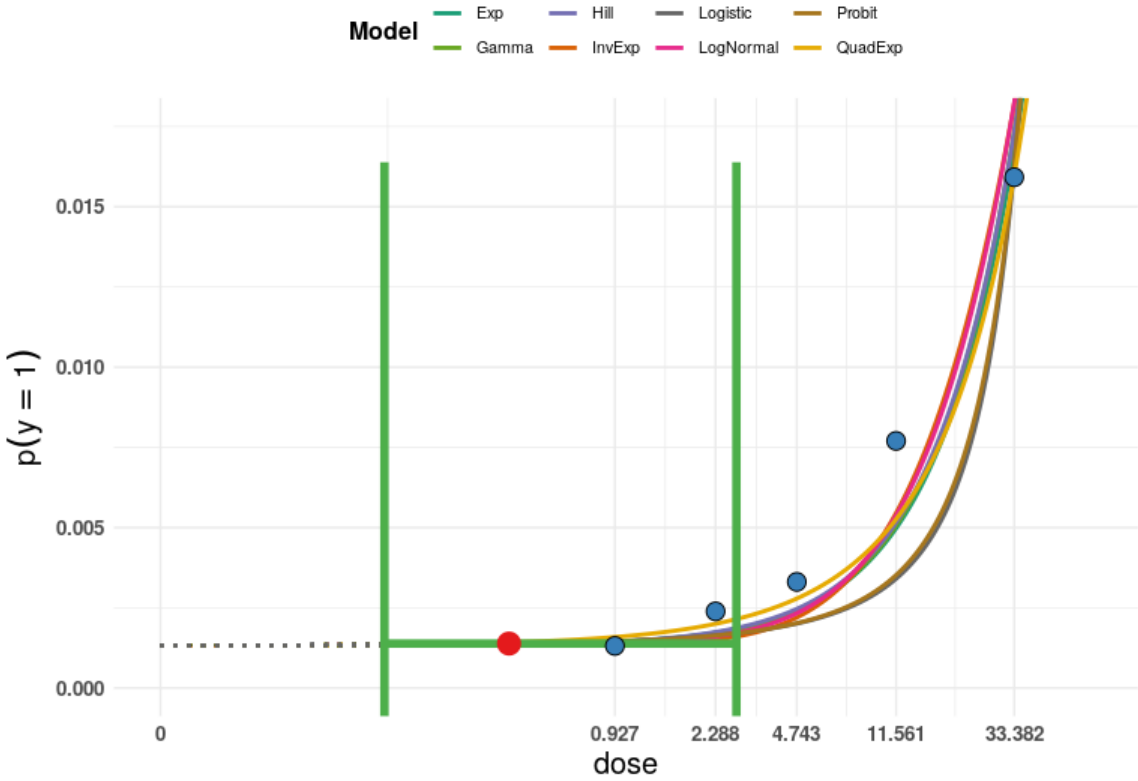

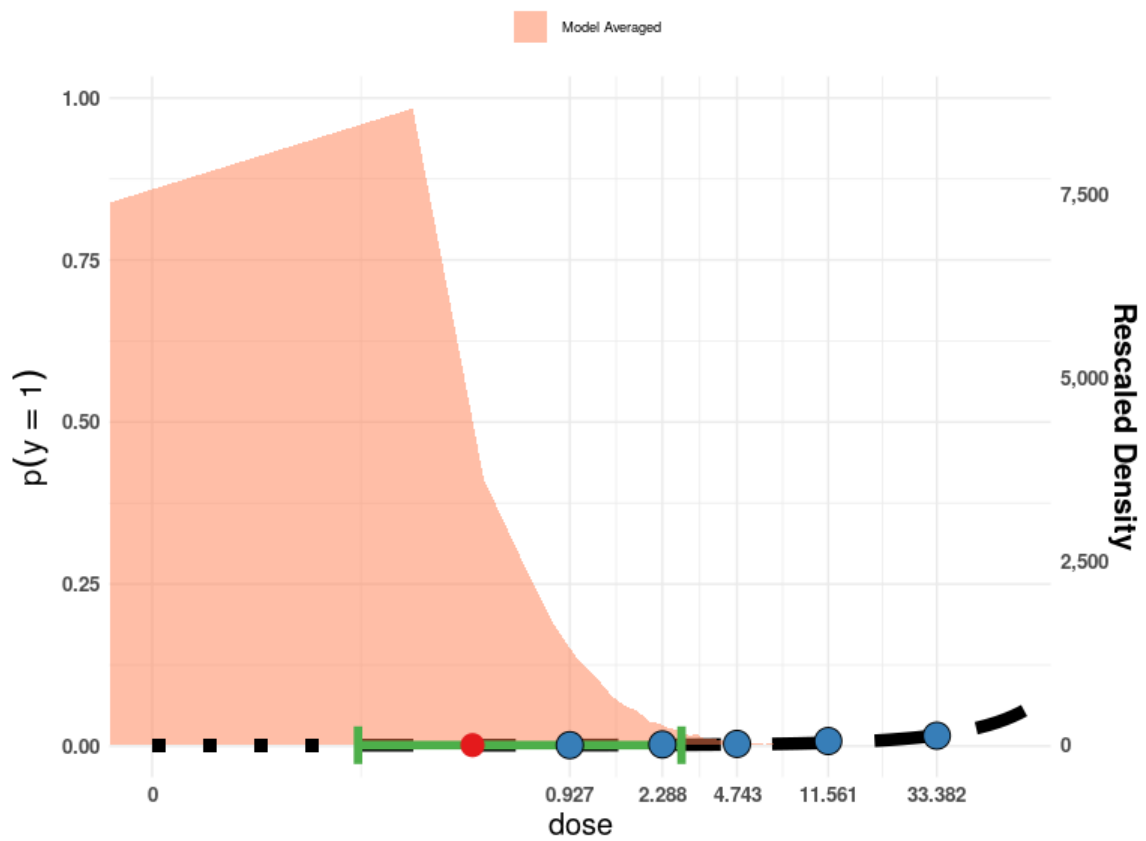

## Cherry et al. (2008) stillbirth, relative BMR 5%

### Data Description

The endpoint to be analyzed is: Adj.cases for stillbirth

Data used for analysis:

| Exposure.µg.kg.bw.per.day | Adj.cases | N     |
|---------------------------|-----------|-------|
| 1.45                      | 492       | 16860 |
| 3.24                      | 386       | 10669 |
| 4.73                      | 177       | 3455  |

The 'Value for CES' is set to 0.00150293.

Extended dose range is applied.

Informative background prior: min: 0.02888968; the most likely: 0.02918149; max: 0.02947331. Shape parameter is applied.

The 'Sampling Method' is set to Bridge Sampling.

### Results

*Information pertaining to this endpoint.*

#### Goodness of Fit

Best fitting model fits sufficiently well (Bayes factor is 1.10e+00).

#### Model Averaged BMD

| Model          | Type | BMDL | BMD   | BMDU  |
|----------------|------|------|-------|-------|
| Model Averaged | BS   | 1.37 | 2.022 | 2.641 |

#### Estimated BMDs per model

| Model | BMDL  | BMD   | BMDU  | Model Weights | Converged |
|-------|-------|-------|-------|---------------|-----------|
| E4_Q  | 1.395 | 1.988 | 2.570 | 0.154         | 1         |
| IE4_Q | 1.700 | 2.269 | 2.800 | 0.083         | 1         |
| H4_Q  | 1.376 | 1.993 | 2.592 | 0.155         | 1         |
| LN4_Q | 1.564 | 2.178 | 2.736 | 0.132         | 1         |
| G4_Q  | 1.431 | 2.024 | 2.617 | 0.201         | 1         |
| QE4_Q | 0.723 | 1.051 | 1.347 | 0.011         | 1         |
| P4_Q  | 1.325 | 1.920 | 2.551 | 0.133         | 1         |
| L4_Q  | 1.357 | 1.923 | 2.553 | 0.131         | 1         |

**Plots of Fitted Models**

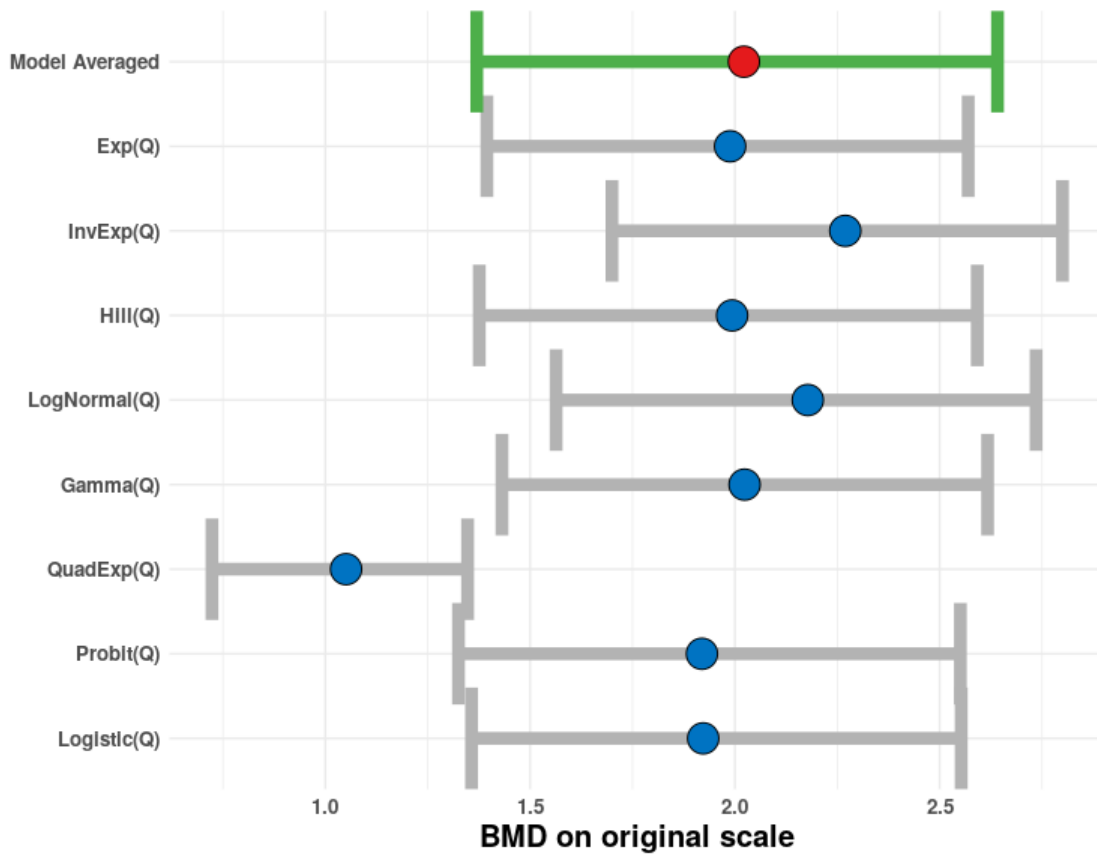

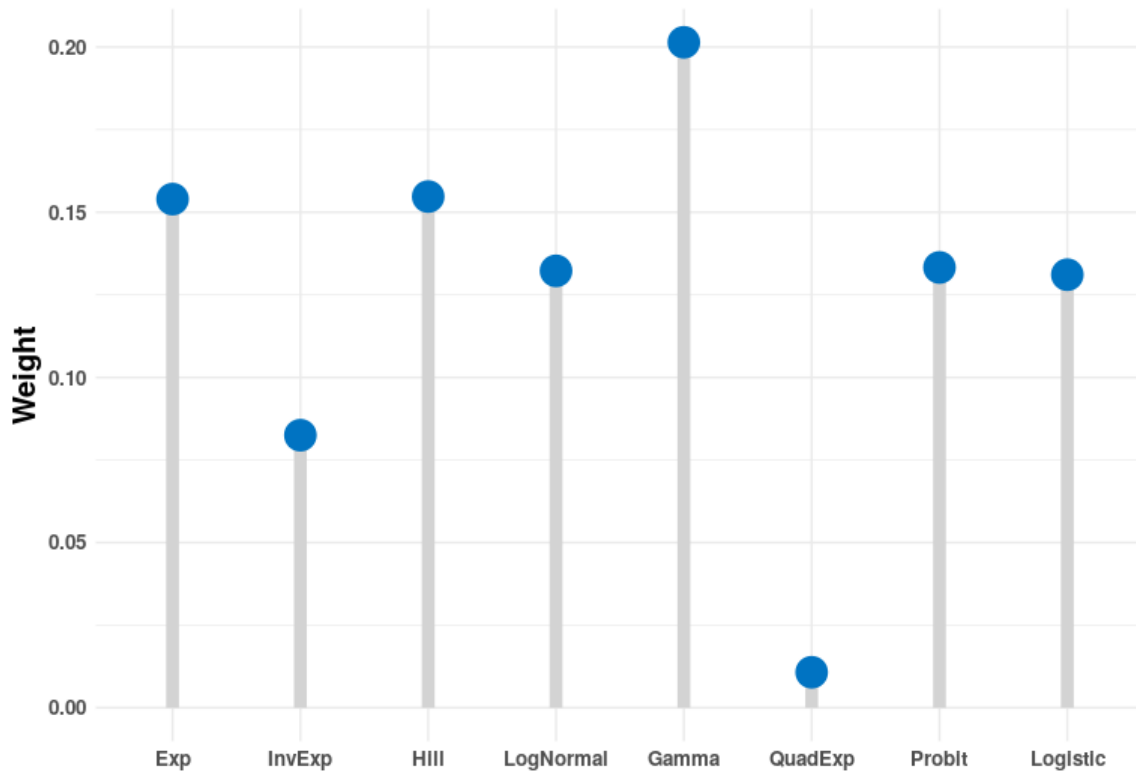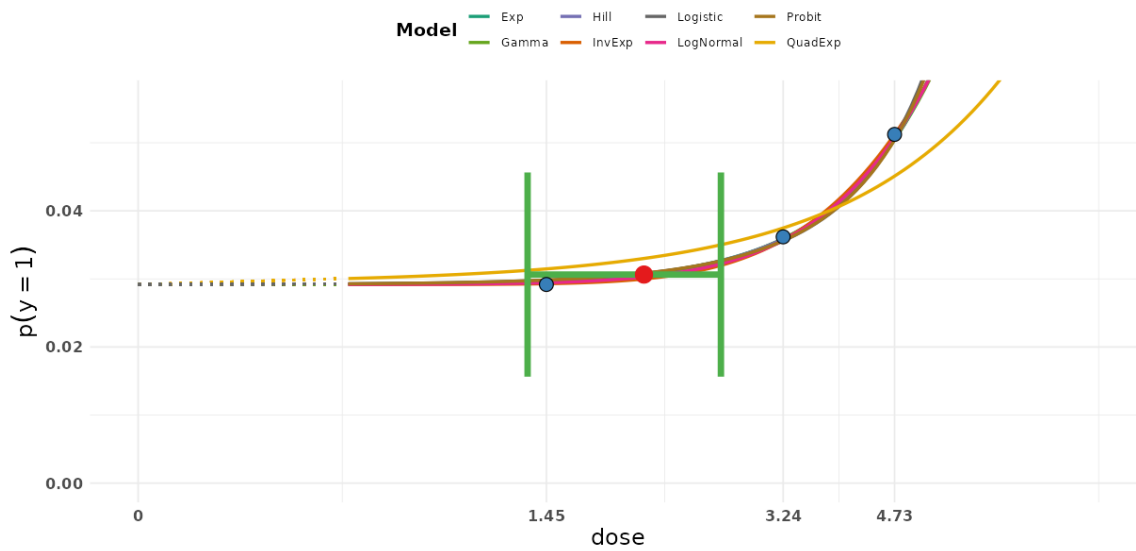

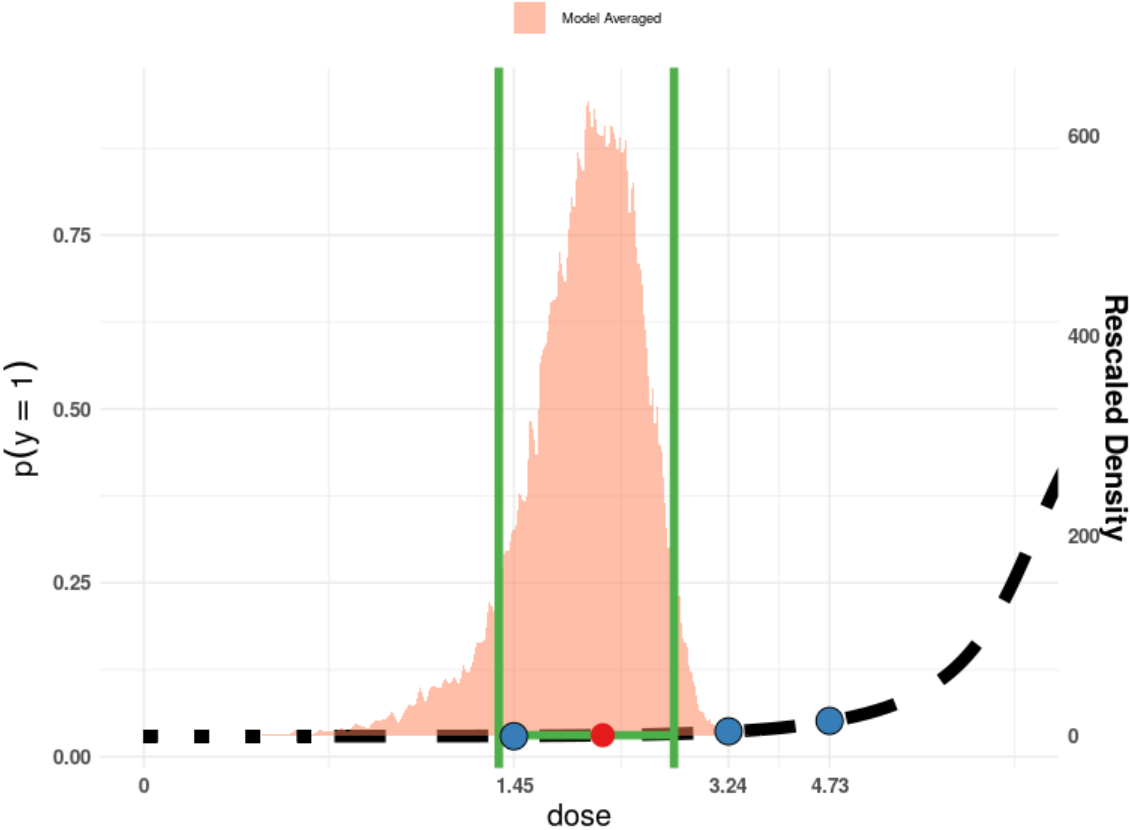

## Gilbert-Diamond et al. (2013) skin cancer, relative BMR 5% (the preferred estimate for the study)

### Data Description

The endpoint to be analyzed is: Adj.cases for skin cancer

Data used for analysis:

| Exposure.µg.kg.bw.per.day | Adj.cases | N      |
|---------------------------|-----------|--------|
| 0.063                     | 96        | 263307 |
| 0.120                     | 90        | 260846 |
| 0.230                     | 137       | 260846 |

The 'Value for CES' is set to 1.824e-05.

Extended dose range is not applied.

Informative background prior: min: 0.00034636; the most likely: 0.00036459; max: 0.00038282. Shape parameter is applied.

The 'Sampling Method' is set to Bridge Sampling.

### Results

*Information pertaining to this endpoint.*

#### Goodness of Fit

Best fitting model fits sufficiently well (Bayes factor is 1.28e+00).

#### Model Averaged BMD

| Model          | Type | BMDL  | BMD   | BMDU |
|----------------|------|-------|-------|------|
| Model Averaged | BS   | 0.062 | 0.147 | 0.21 |

#### Estimated BMDs per model

| Model | BMDL  | BMD   | BMDU  | Model Weights | Converged |
|-------|-------|-------|-------|---------------|-----------|
| E4_Q  | 0.066 | 0.141 | 0.200 | 0.142         | 1         |
| IE4_Q | 0.133 | 0.196 | 0.221 | 0.092         | 1         |
| H4_Q  | 0.068 | 0.139 | 0.204 | 0.146         | 1         |
| LN4_Q | 0.106 | 0.176 | 0.216 | 0.161         | 1         |
| G4_Q  | 0.066 | 0.134 | 0.177 | 0.128         | 1         |
| QE4_Q | 0.038 | 0.069 | 0.142 | 0.066         | 1         |
| P4_Q  | 0.070 | 0.140 | 0.196 | 0.131         | 1         |
| L4_Q  | 0.068 | 0.144 | 0.204 | 0.135         | 1         |

**Plots of Fitted Models**

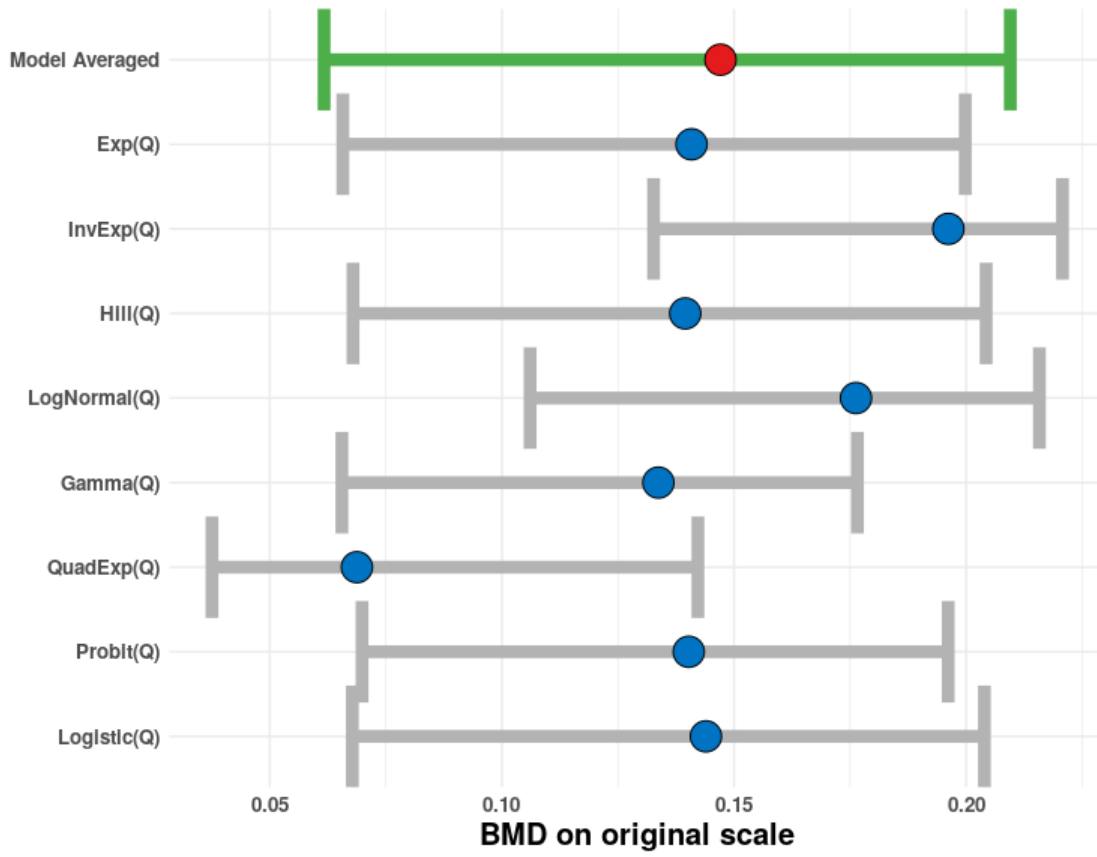



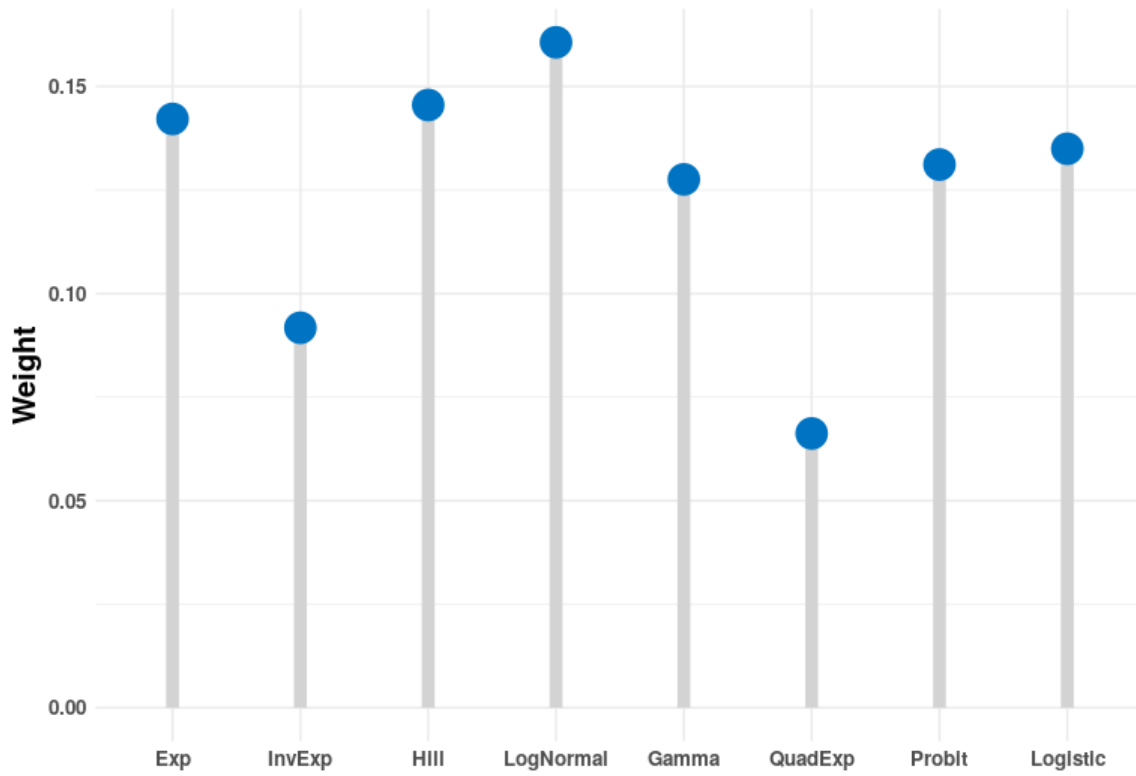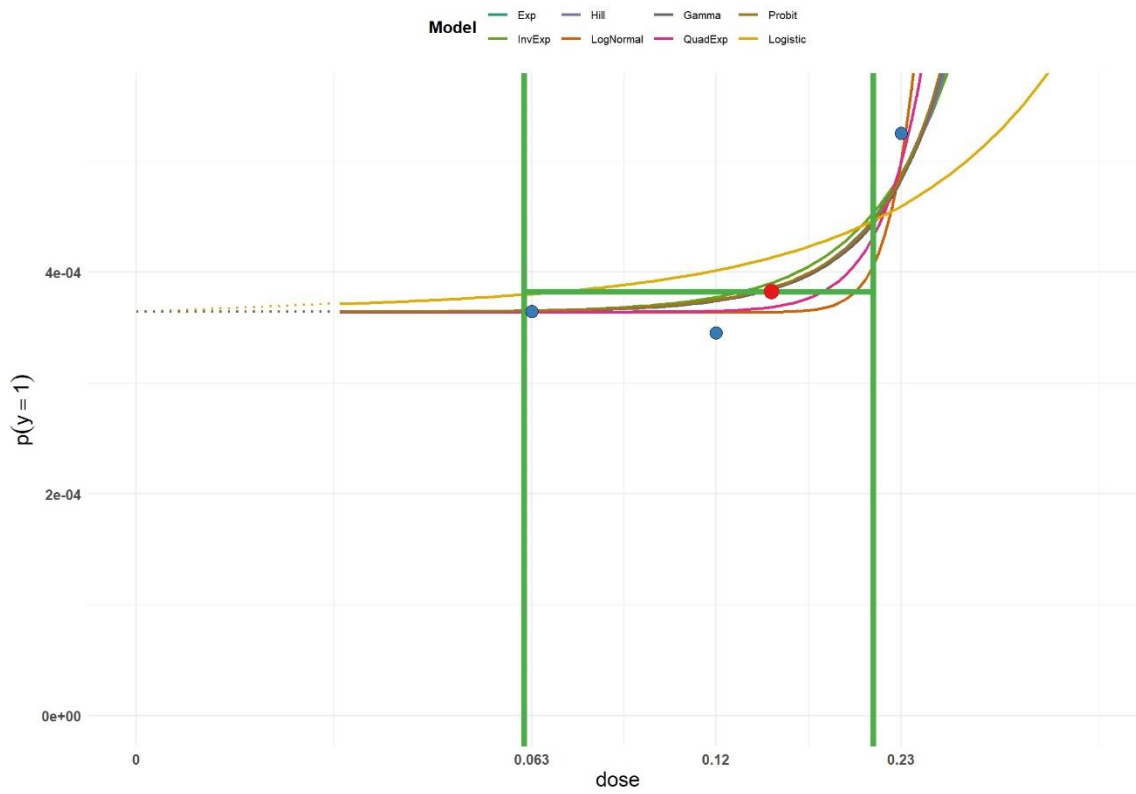

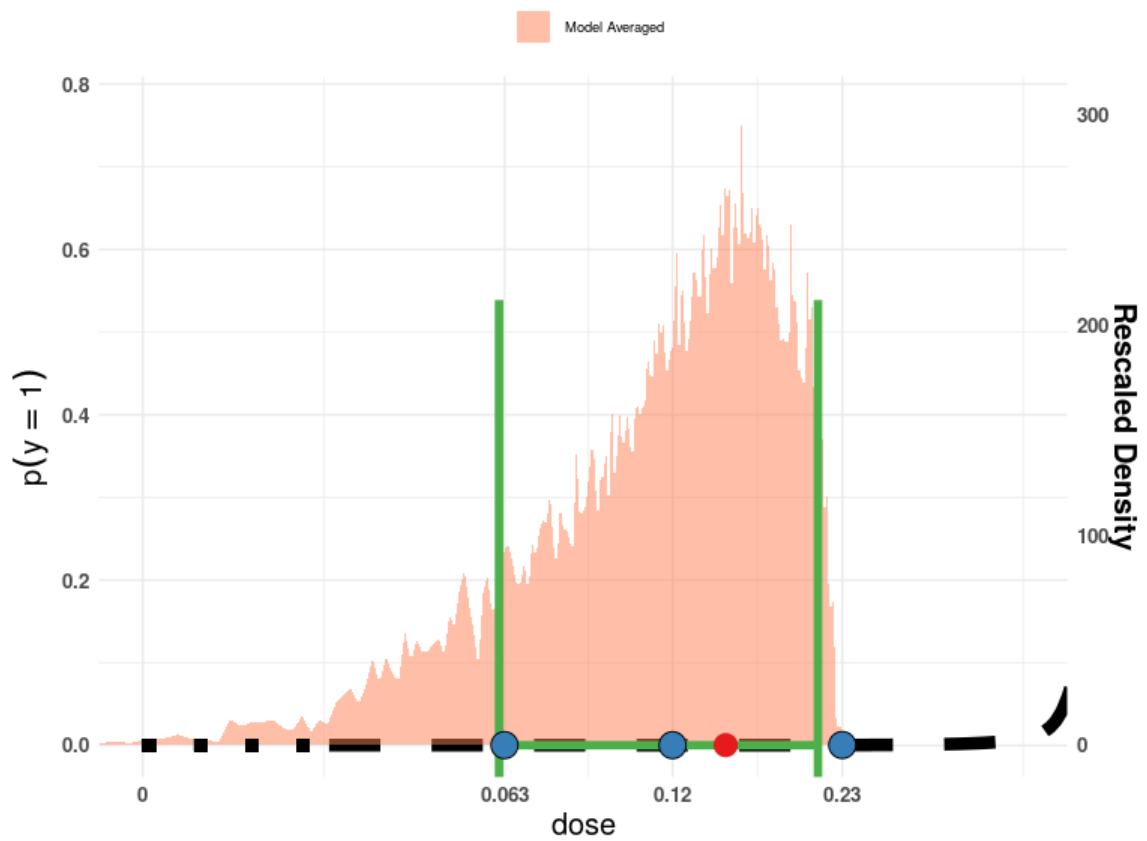

## Gilbert-Diamond et al. (2013) skin cancer, relative BMR 5% Without an informative background prior (included only in the uncertainty analysis)

### Data Description

The endpoint to be analyzed is: Adj.cases for skin cancer

Data used for analysis:

| Exposure.µg.kg.bw.per.day | Adj.cases | N      |
|---------------------------|-----------|--------|
| 0.063                     | 96        | 263307 |
| 0.120                     | 90        | 260846 |
| 0.230                     | 137       | 260846 |

The 'Value for CES' is set to 1.824e-05.

Extended dose range is not applied.

The 'Sampling Method' is set to Bridge Sampling.

### Results

*Information pertaining to this endpoint.*

### Goodness of Fit

Best fitting model fits sufficiently well (Bayes factor is 1.79e+00).

### Model Averaged BMD

| Model          | Type | BMDL  | BMD   | BMDU  |
|----------------|------|-------|-------|-------|
| Model Averaged | BS   | 0.035 | 0.134 | 0.207 |

### Estimated BMDs per model

| Model | BMDL  | BMD   | BMDU  | Model Weights | Converged |
|-------|-------|-------|-------|---------------|-----------|
| E4_Q  | 0.042 | 0.132 | 0.203 | 0.143         | 1         |
| IE4_Q | 0.127 | 0.194 | 0.221 | 0.078         | 1         |
| H4_Q  | 0.042 | 0.132 | 0.194 | 0.146         | 1         |
| G4_Q  | 0.038 | 0.121 | 0.180 | 0.132         | 1         |
| QE4_Q | 0.022 | 0.053 | 0.151 | 0.108         | 1         |
| P4_Q  | 0.047 | 0.137 | 0.202 | 0.137         | 1         |
| L4_Q  | 0.046 | 0.130 | 0.196 | 0.134         | 1         |

**Plots of Fitted Models**

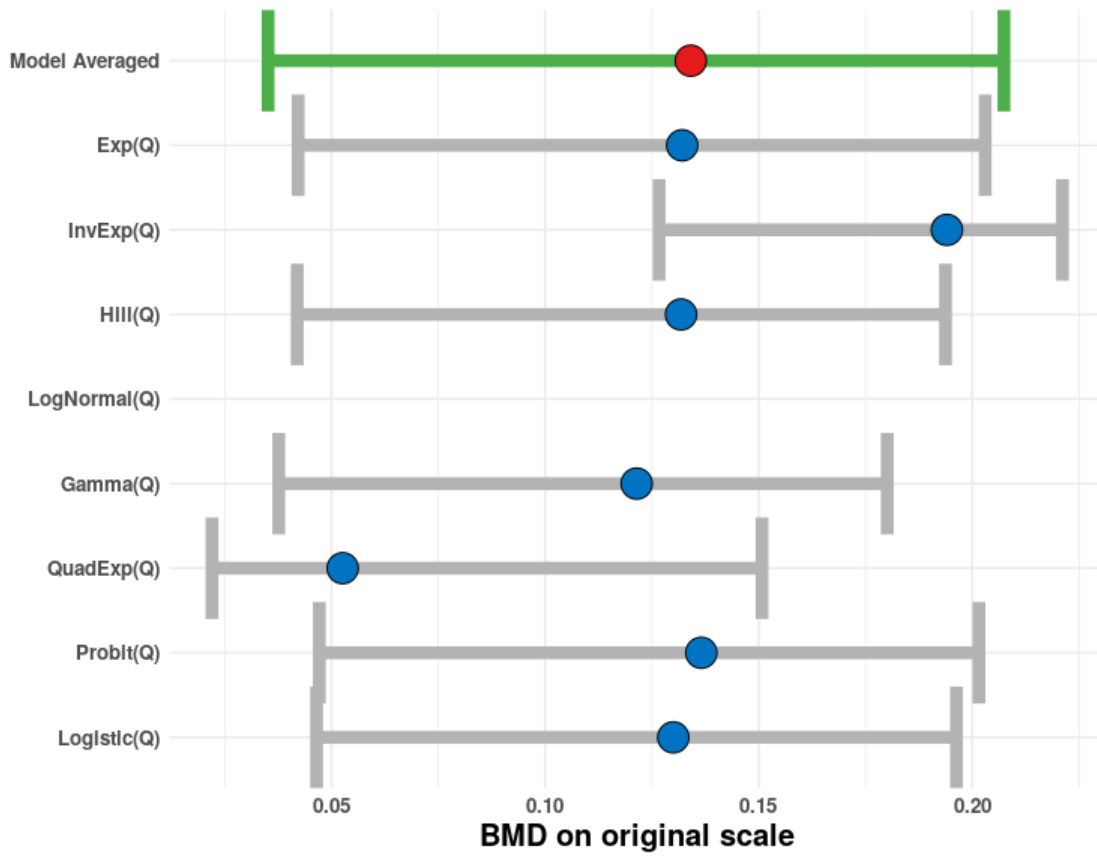

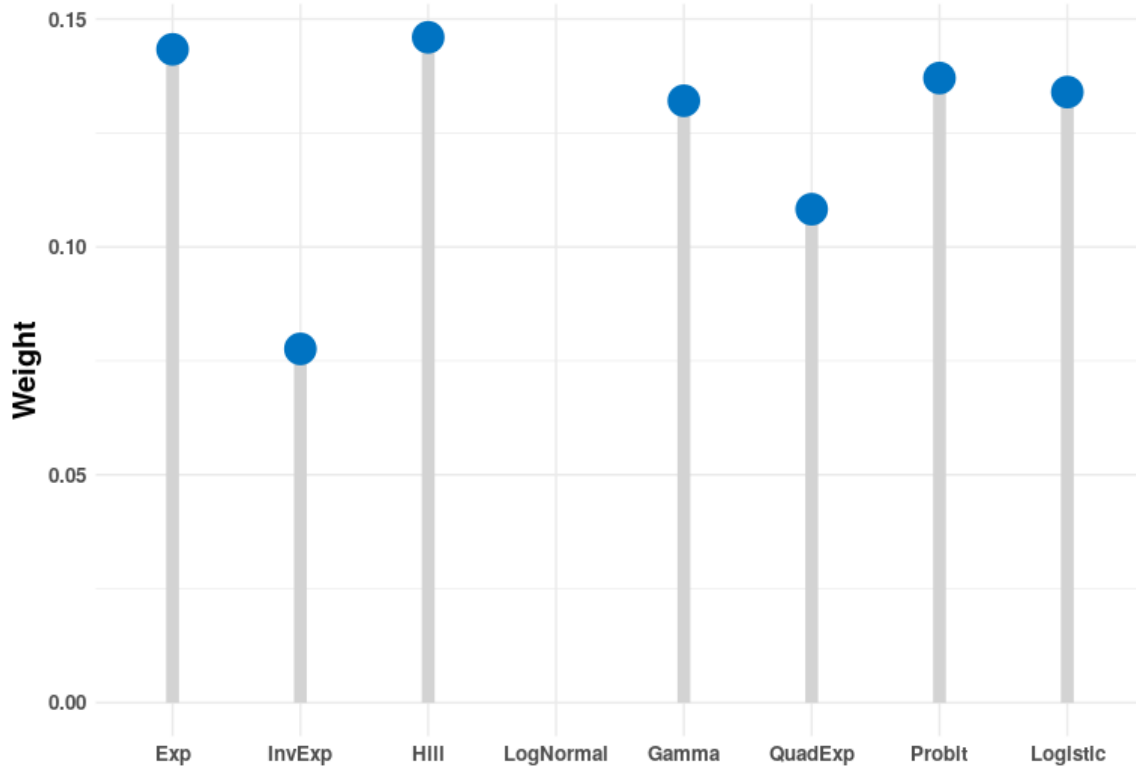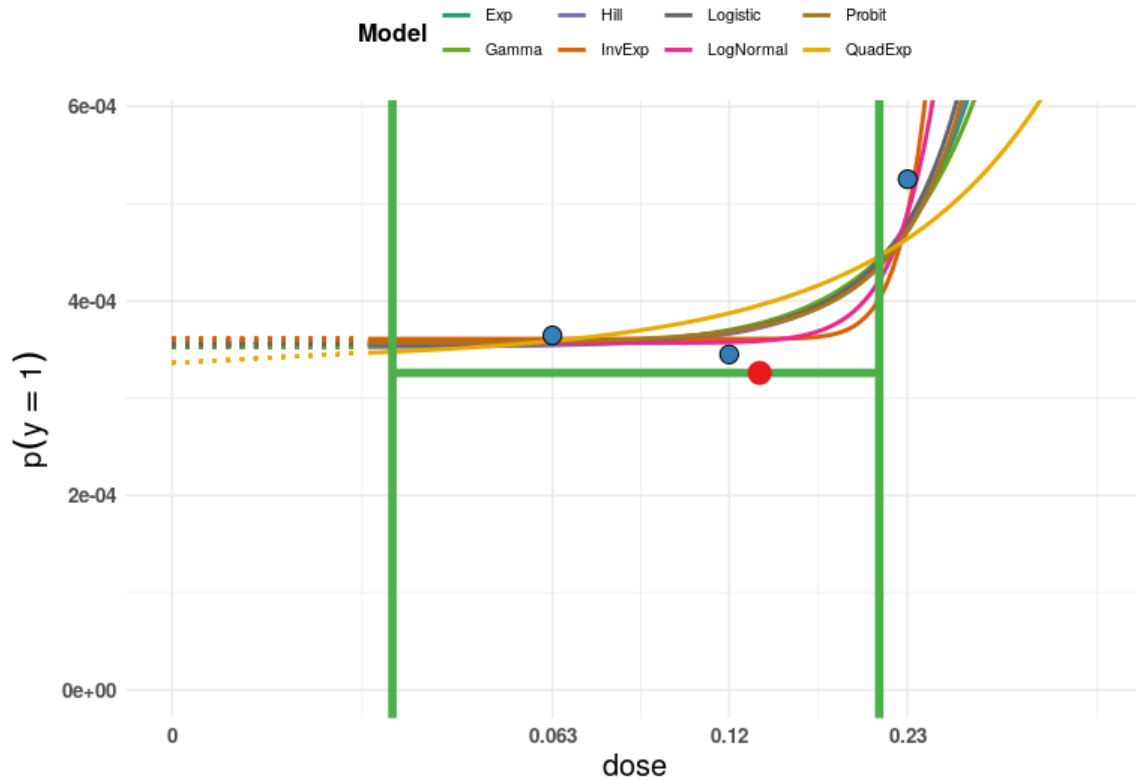

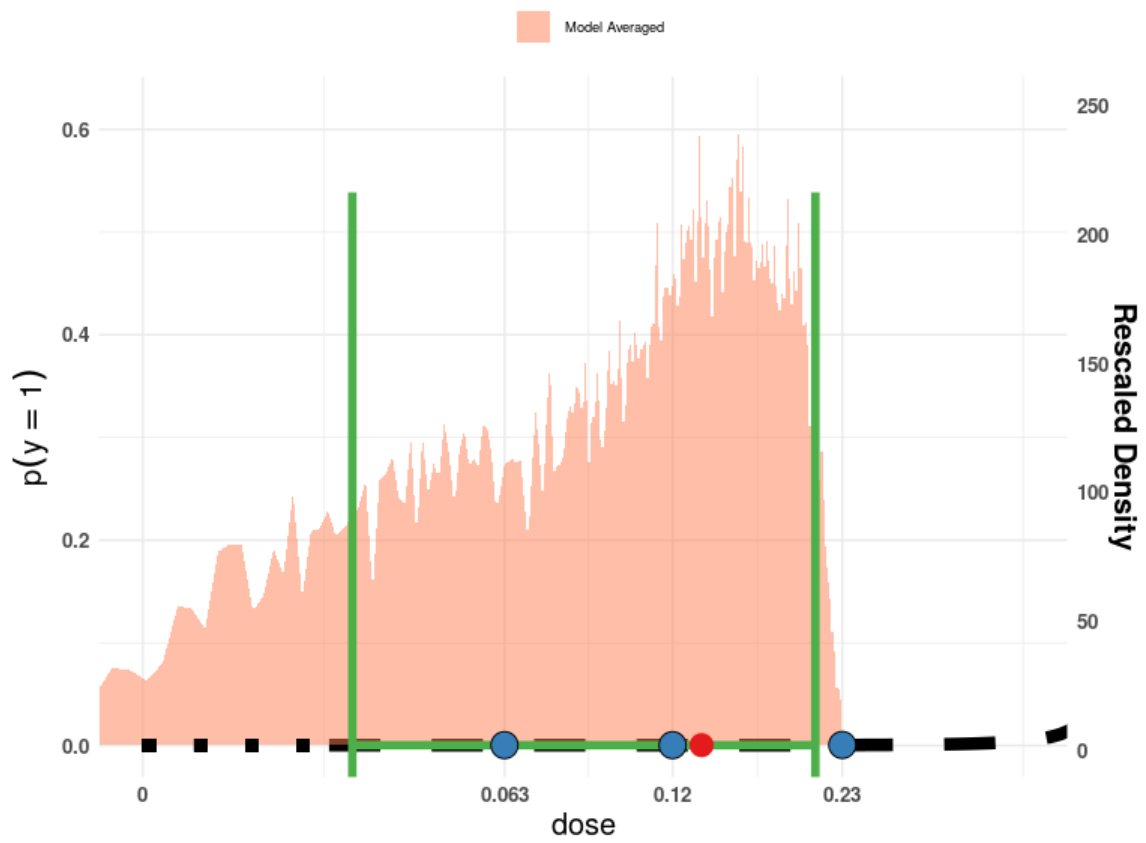

## Gilbert-Diamond et al. (2013) skin cancer, relative BMR 5% Source population reduced by 10% (only included in the uncertainty analysis)

### Data Description

The endpoint to be analyzed is: Adj.cases for skin cancer

Data used for analysis:

| Exposure.µg.kg.bw.per.day | Adj.cases | N      |
|---------------------------|-----------|--------|
| 0.063                     | 96        | 236976 |
| 0.120                     | 90        | 234762 |
| 0.230                     | 137       | 234762 |

The 'Value for CES' is set to 2.026e-05.

Extended dose range is not applied.

Informative background prior: min: 0.00038485; the most likely: 0.00040510; max: 0.00042536. Shape parameter is applied.

The 'Sampling Method' is set to Bridge Sampling.

### Results

*Information pertaining to this endpoint.*

#### Goodness of Fit

Best fitting model fits sufficiently well (Bayes factor is 1.30e+00).

#### Model Averaged BMD

| Model          | Type | BMDL  | BMD   | BMDU  |
|----------------|------|-------|-------|-------|
| Model Averaged | BS   | 0.056 | 0.143 | 0.207 |

#### Estimated BMDs per model

| Model | BMDL  | BMD   | BMDU  | Model Weights | Converged |
|-------|-------|-------|-------|---------------|-----------|
| E4_Q  | 0.070 | 0.137 | 0.195 | 0.142         | 1         |
| IE4_Q | 0.131 | 0.195 | 0.220 | 0.095         | 1         |
| H4_Q  | 0.070 | 0.140 | 0.196 | 0.145         | 1         |
| LN4_Q | 0.109 | 0.174 | 0.212 | 0.147         | 1         |
| G4_Q  | 0.046 | 0.104 | 0.171 | 0.133         | 0         |
| QE4_Q | 0.038 | 0.069 | 0.152 | 0.068         | 1         |
| P4_Q  | 0.069 | 0.139 | 0.195 | 0.132         | 1         |
| L4_Q  | 0.069 | 0.140 | 0.199 | 0.139         | 1         |

**Plots of Fitted Models**

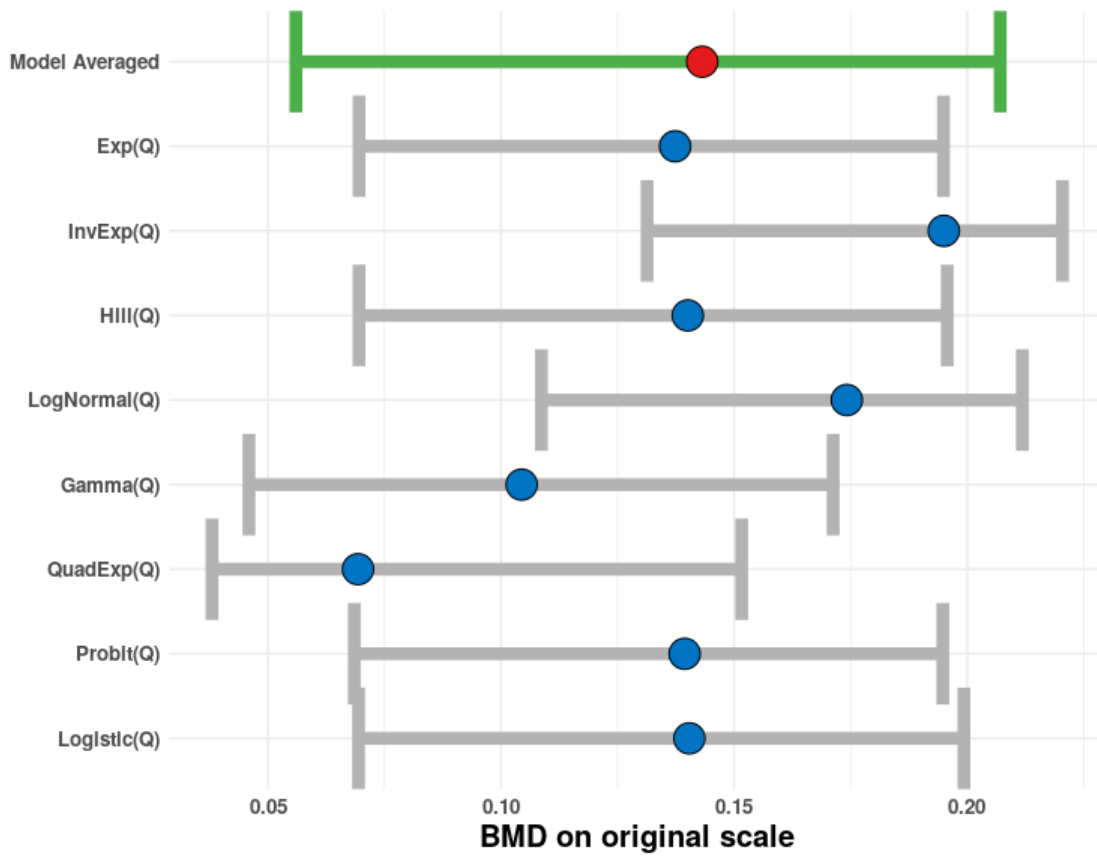



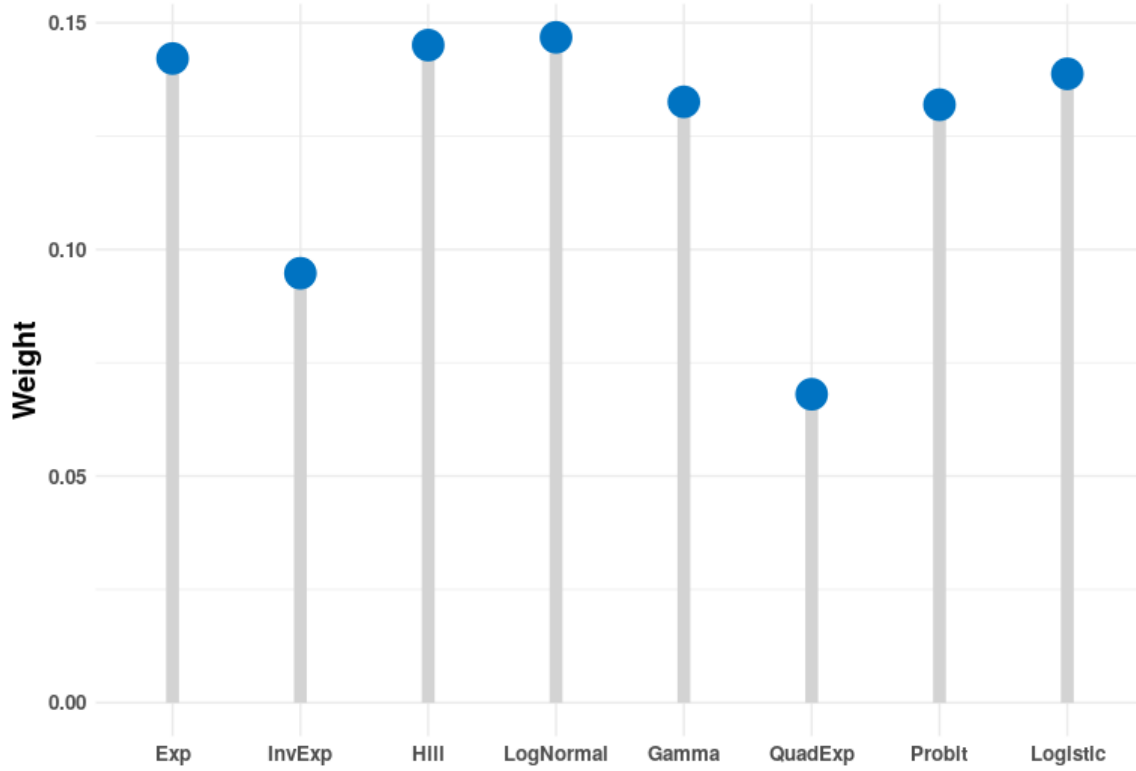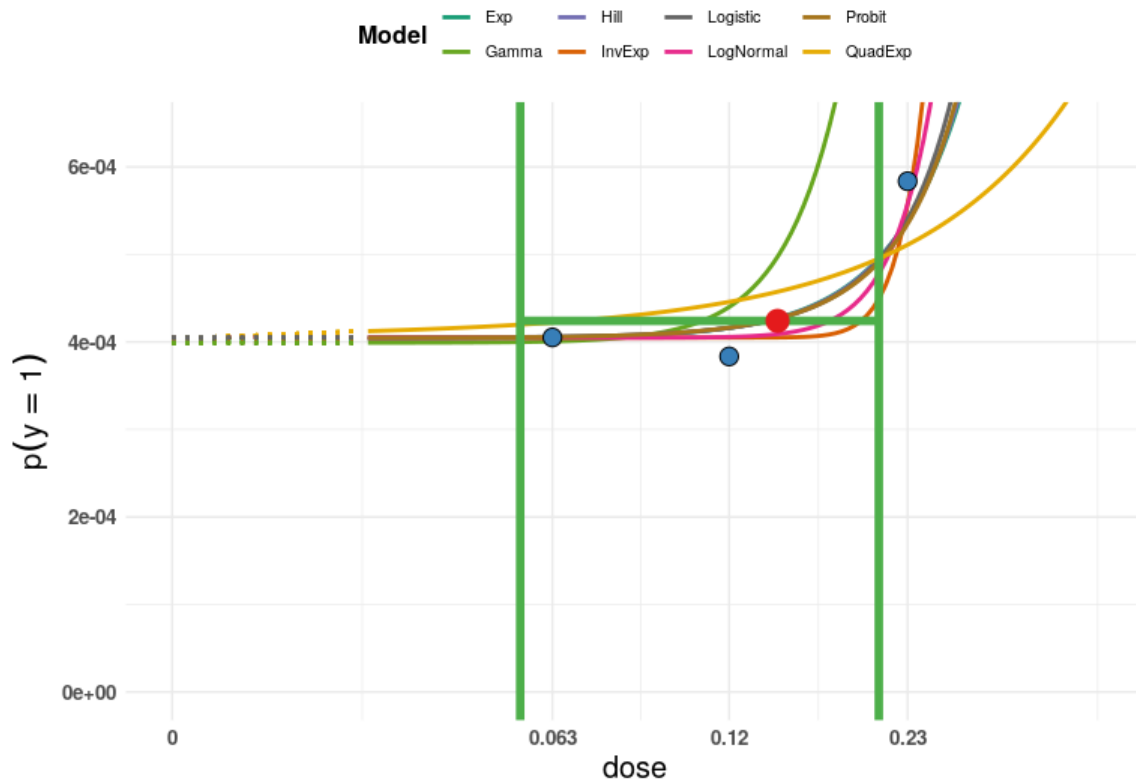

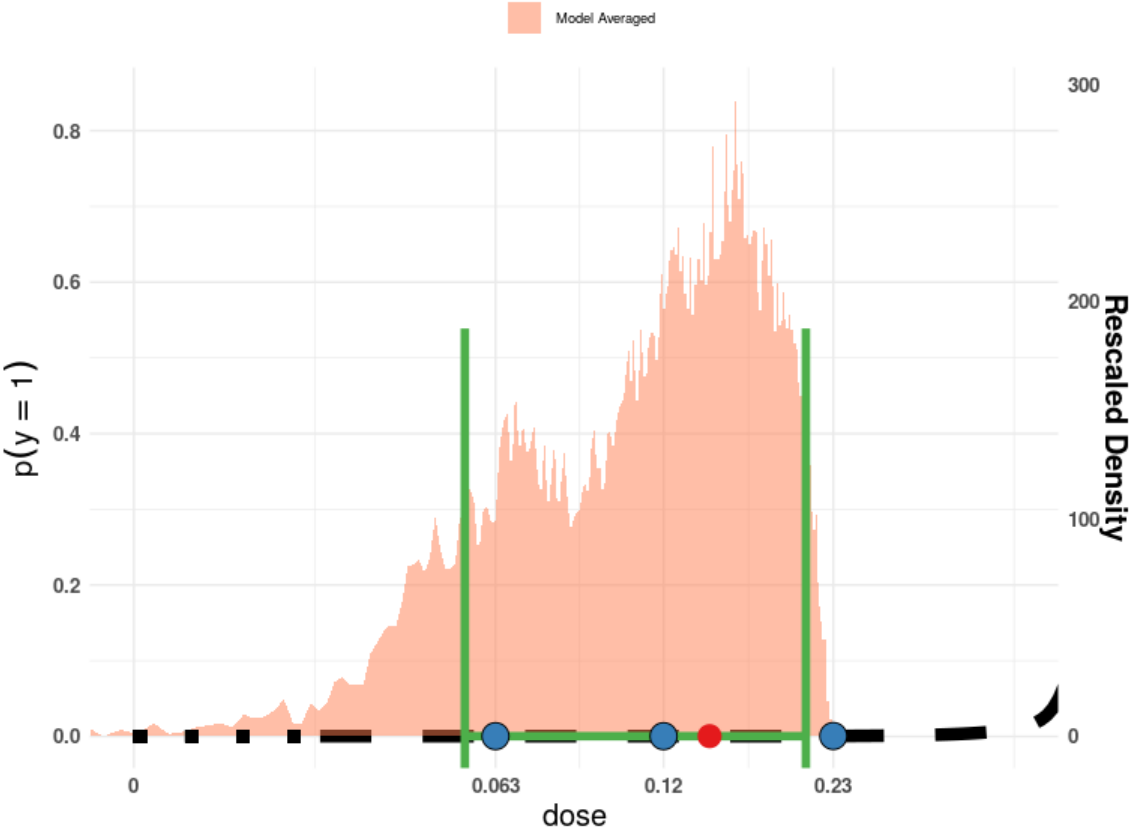

## Gilbert-Diamond et al. (2013) skin cancer, relative BMR 5% Source population reduced by 20% (only included in the uncertainty analysis)

### Data Description

The endpoint to be analyzed is: Adj.cases for skin cancer

Data used for analysis:

| Exposure.µg.kg.bw.per.day | Adj.cases | N      |
|---------------------------|-----------|--------|
| 0.063                     | 96        | 210646 |
| 0.120                     | 90        | 208677 |
| 0.230                     | 137       | 208677 |

The 'Value for CES' is set to 2.28e-05.

Extended dose range is not applied.

Informative background prior: min: 0.00043295; the most likely: 0.00045574; max: 0.00047853. Shape parameter is applied.

The 'Sampling Method' is set to Bridge Sampling.

### Results

*Information pertaining to this endpoint.*

#### Goodness of Fit

Best fitting model fits sufficiently well (Bayes factor is 1.35e+00).

#### Model Averaged BMD

| Model          | Type | BMDL  | BMD   | BMDU  |
|----------------|------|-------|-------|-------|
| Model Averaged | BS   | 0.061 | 0.146 | 0.209 |

#### Estimated BMDs per model

| Model | BMDL  | BMD   | BMDU  | Model Weights | Converged |
|-------|-------|-------|-------|---------------|-----------|
| E4_Q  | 0.070 | 0.142 | 0.200 | 0.149         | 1         |
| IE4_Q | 0.133 | 0.196 | 0.220 | 0.095         | 1         |
| H4_Q  | 0.064 | 0.135 | 0.190 | 0.140         | 1         |
| LN4_Q | 0.106 | 0.175 | 0.214 | 0.151         | 1         |
| G4_Q  | 0.070 | 0.133 | 0.177 | 0.130         | 1         |
| QE4_Q | 0.037 | 0.069 | 0.151 | 0.068         | 1         |
| P4_Q  | 0.070 | 0.142 | 0.197 | 0.133         | 1         |
| L4_Q  | 0.063 | 0.140 | 0.196 | 0.135         | 1         |

**Plots of Fitted Models**

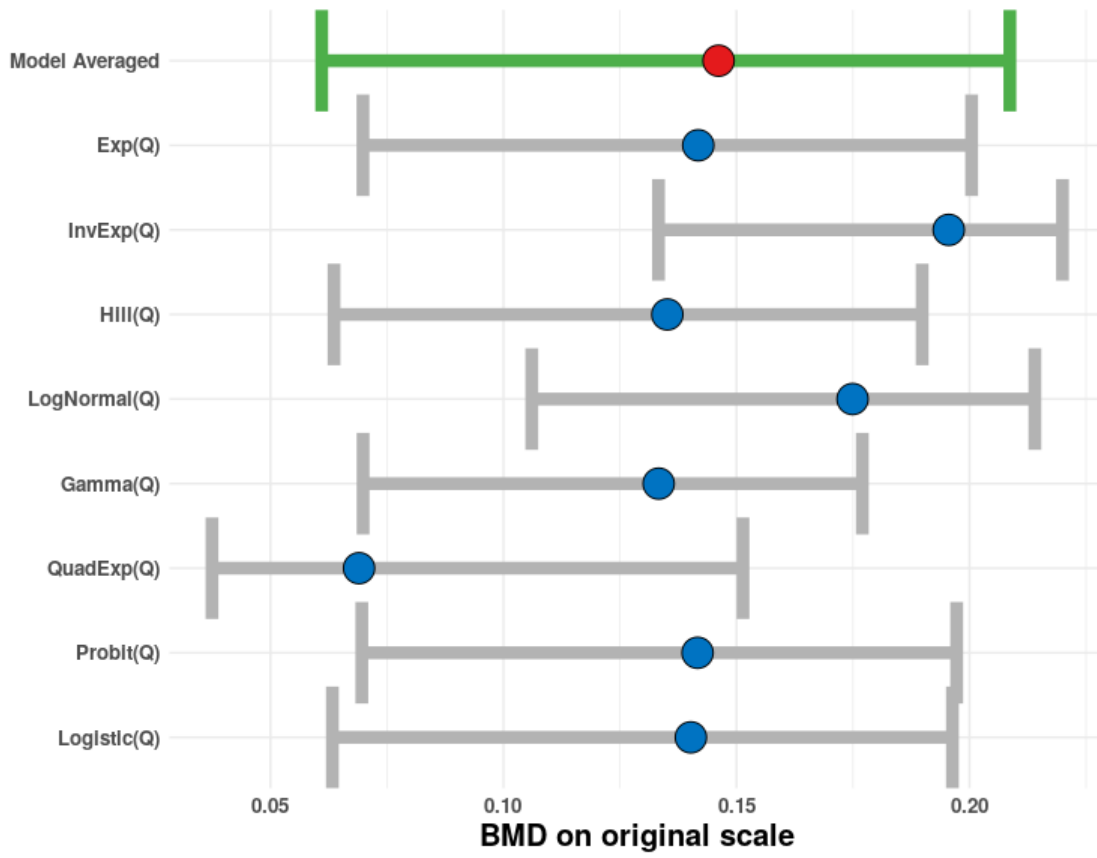

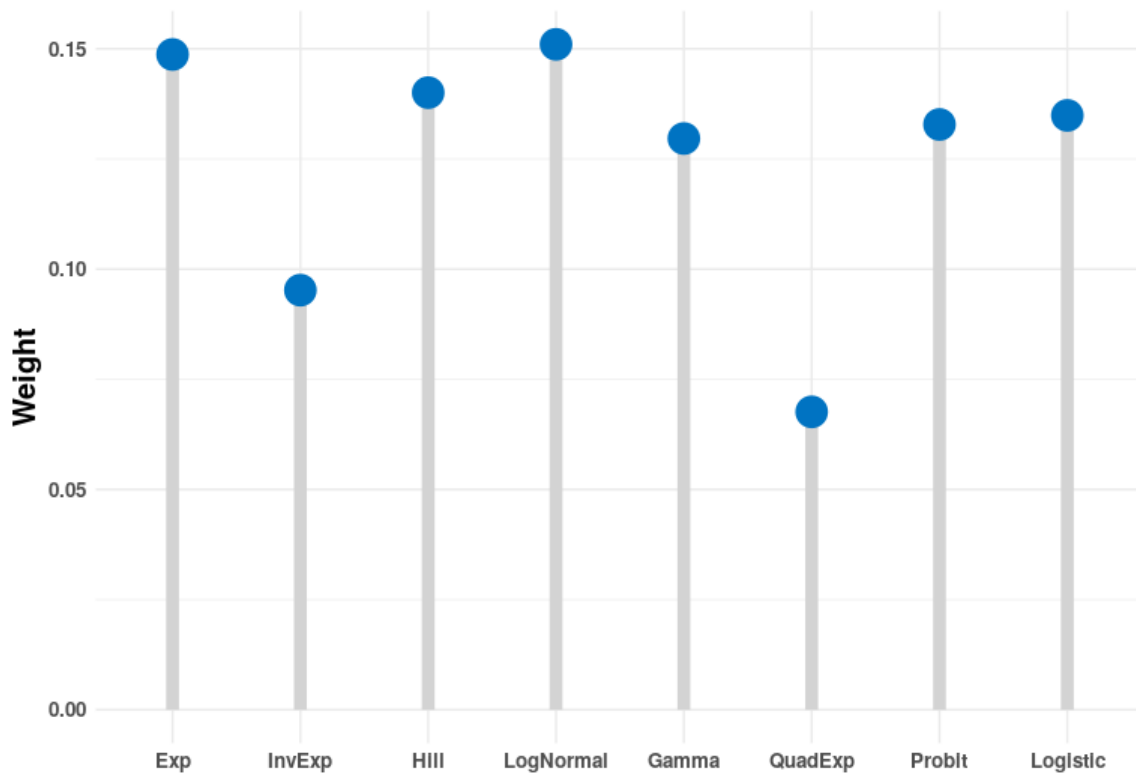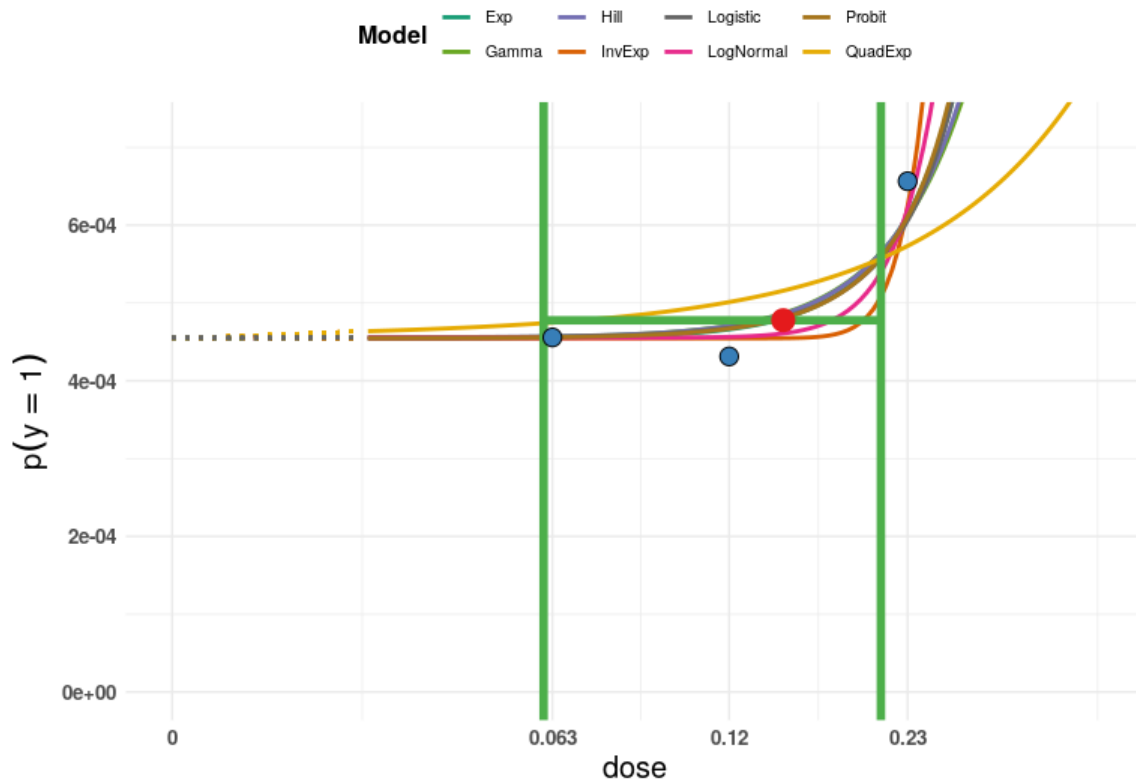

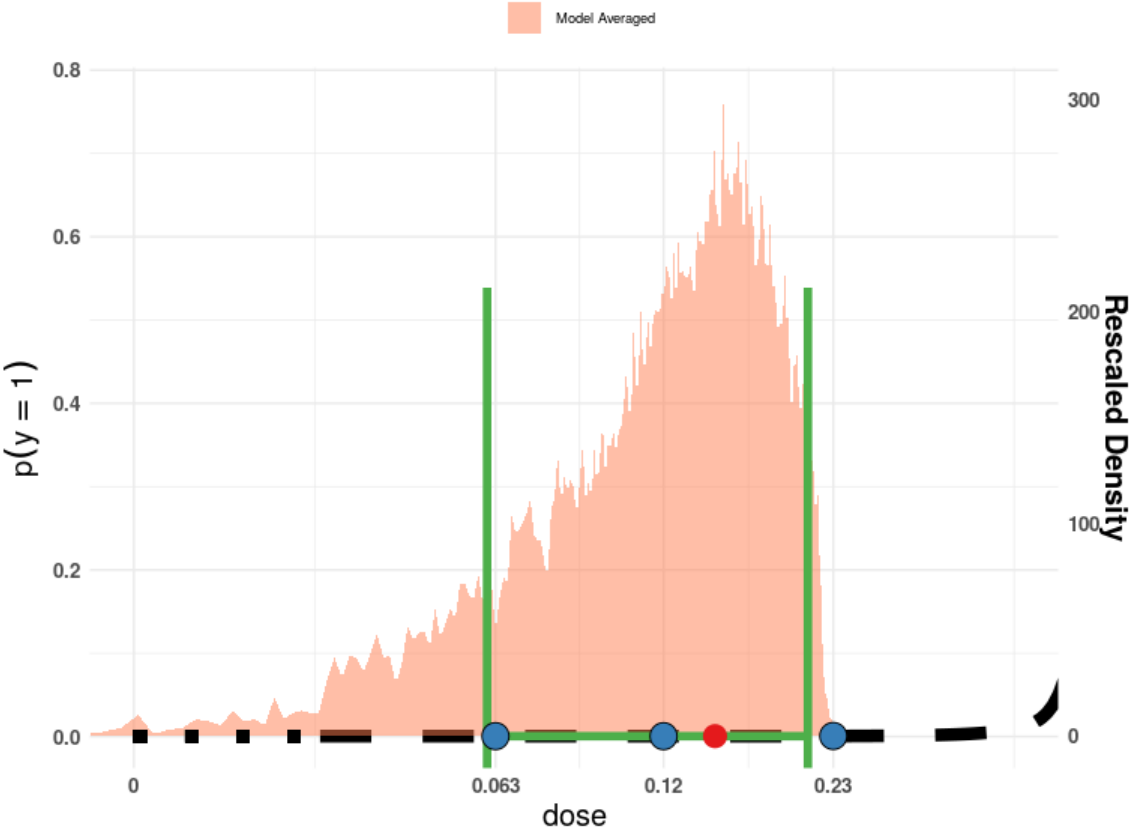

## Gilbert-Diamond et al. (2013) skin cancer, relative BMR 5% Source population increased by 10% (only included in the uncertainty analysis)

### Data Description

The endpoint to be analyzed is: Adj.cases for skin cancer

Data used for analysis:

| Exposure.µg.kg.bw.per.day | Adj.cases | N      |
|---------------------------|-----------|--------|
| 0.063                     | 96        | 289638 |
| 0.120                     | 90        | 286931 |
| 0.230                     | 137       | 286931 |

The 'Value for CES' is set to 1.658e-05.

Extended dose range is not applied.

Informative background prior: min: 0.00031488; the most likely: 0.00033145; max: 0.00034802. Shape parameter is applied.

The 'Sampling Method' is set to Bridge Sampling.

### Results

*Information pertaining to this endpoint.*

#### Goodness of Fit

Best fitting model fits sufficiently well (Bayes factor is 1.40e+00).

#### Model Averaged BMD

| Model          | Type | BMDL  | BMD   | BMDU  |
|----------------|------|-------|-------|-------|
| Model Averaged | BS   | 0.061 | 0.145 | 0.211 |

#### Estimated BMDs per model

| Model | BMDL  | BMD   | BMDU  | Model Weights | Converged |
|-------|-------|-------|-------|---------------|-----------|
| E4_Q  | 0.066 | 0.137 | 0.191 | 0.138         | 1         |
| IE4_Q | 0.133 | 0.195 | 0.222 | 0.093         | 1         |
| H4_Q  | 0.070 | 0.140 | 0.192 | 0.147         | 1         |
| LN4_Q | 0.105 | 0.179 | 0.222 | 0.153         | 0         |
| G4_Q  | 0.066 | 0.134 | 0.176 | 0.132         | 1         |
| QE4_Q | 0.038 | 0.069 | 0.148 | 0.069         | 1         |
| P4_Q  | 0.070 | 0.140 | 0.196 | 0.134         | 1         |
| L4_Q  | 0.071 | 0.138 | 0.192 | 0.134         | 1         |

**Plots of Fitted Models**

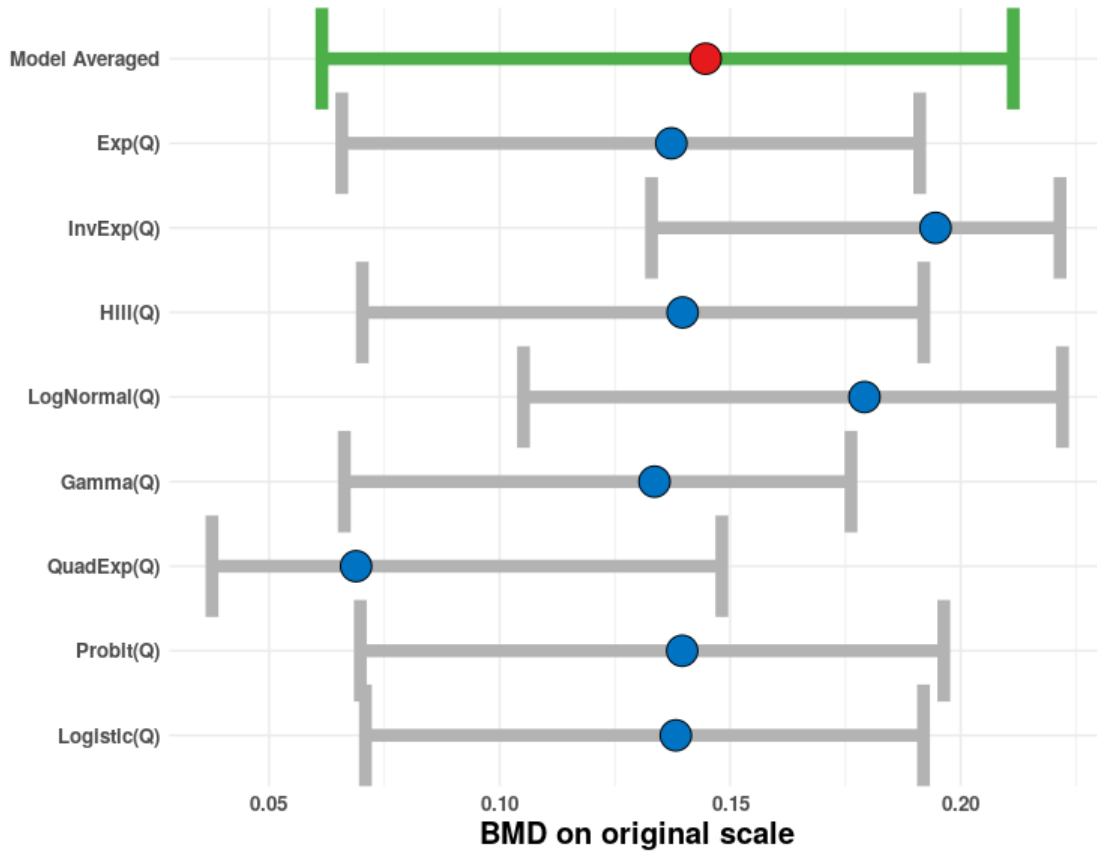



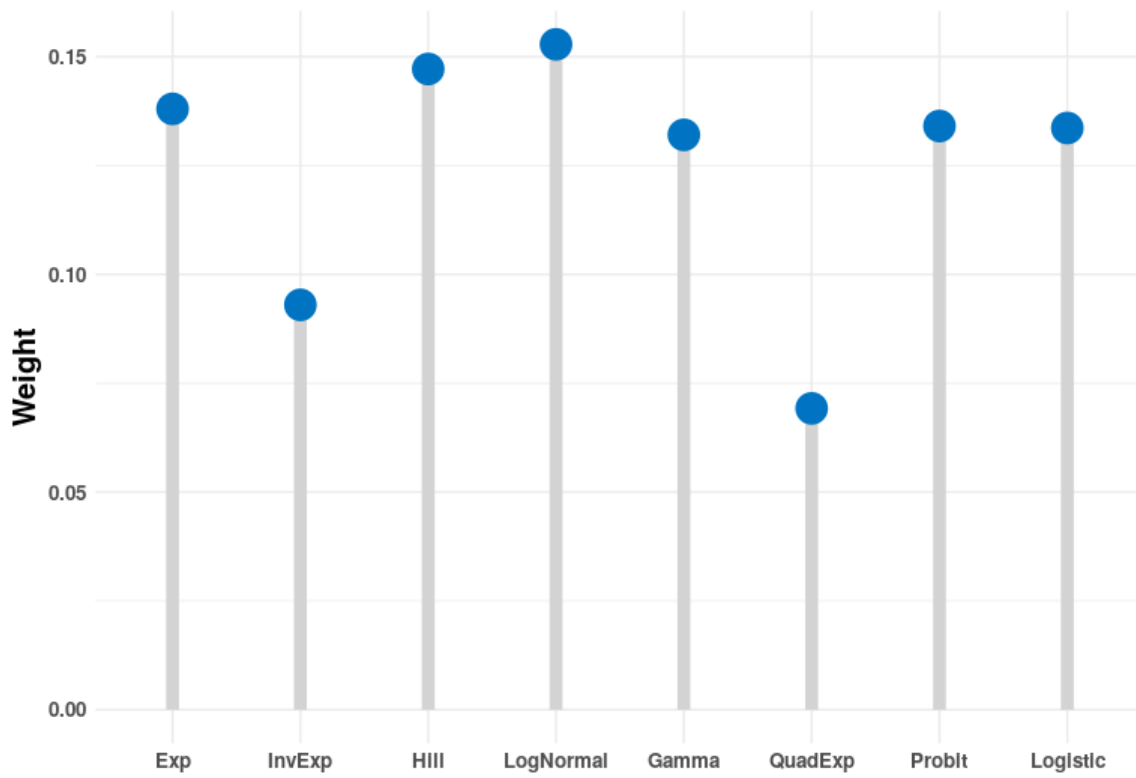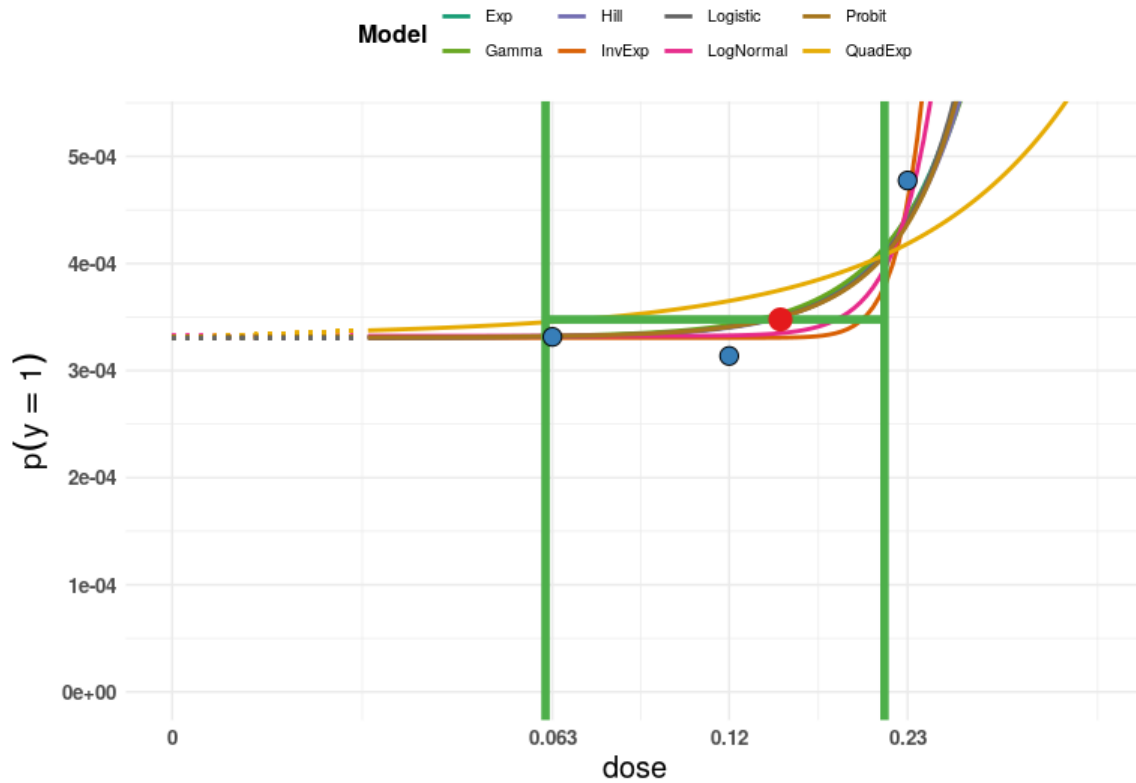

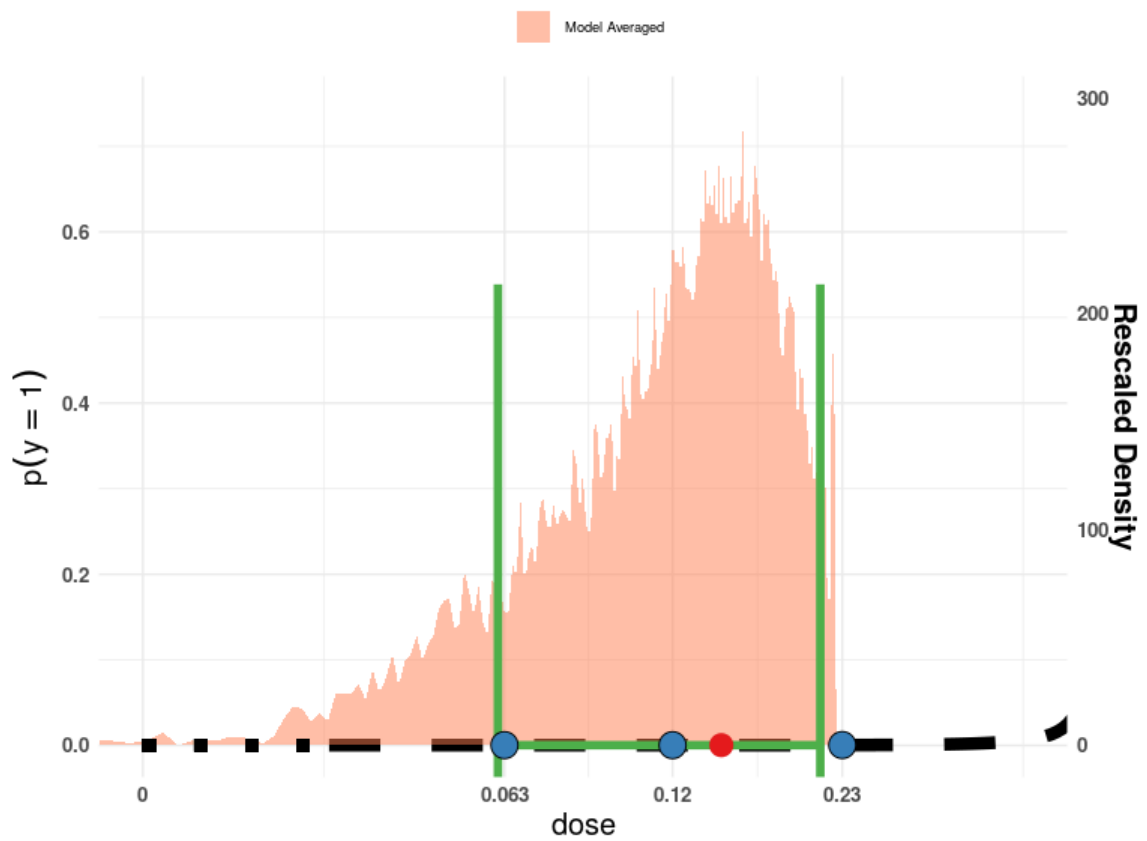

## Gilbert-Diamond et al. (2013) skin cancer, relative BMR 5% Source population increased by 20% (only included in the uncertainty analysis)

### Data Description

The endpoint to be analyzed is: Adj.cases for skin cancer

Data used for analysis:

| Exposure.µg.kg.bw.per.day | Adj.cases | N      |
|---------------------------|-----------|--------|
| 0.063                     | 96        | 315969 |
| 0.120                     | 90        | 313016 |
| 0.230                     | 137       | 313016 |

The 'Value for CES' is set to 1.52e-05.

Extended dose range is not applied.

Informative background prior: min: 0.00028864; the most likely: 0.00030383; max: 0.00031902. Shape parameter is applied.

The 'Sampling Method' is set to Bridge Sampling.

### Results

*Information pertaining to this endpoint.*

#### Goodness of Fit

Best fitting model fits sufficiently well (Bayes factor is 1.34e+00).

#### Model Averaged BMD

| Model          | Type | BMDL | BMD   | BMDU  |
|----------------|------|------|-------|-------|
| Model Averaged | BS   | 0.06 | 0.145 | 0.208 |

#### Estimated BMDs per model

| Model | BMDL  | BMD   | BMDU  | Model Weights | Converged |
|-------|-------|-------|-------|---------------|-----------|
| E4_Q  | 0.064 | 0.138 | 0.192 | 0.141         | 1         |
| IE4_Q | 0.130 | 0.192 | 0.221 | 0.087         | 0         |
| H4_Q  | 0.065 | 0.137 | 0.198 | 0.146         | 1         |
| LN4_Q | 0.105 | 0.176 | 0.216 | 0.151         | 1         |
| G4_Q  | 0.068 | 0.131 | 0.177 | 0.128         | 1         |
| QE4_Q | 0.038 | 0.069 | 0.152 | 0.069         | 1         |
| P4_Q  | 0.068 | 0.141 | 0.199 | 0.140         | 1         |
| L4_Q  | 0.070 | 0.140 | 0.197 | 0.138         | 1         |

**Plots of Fitted Models**

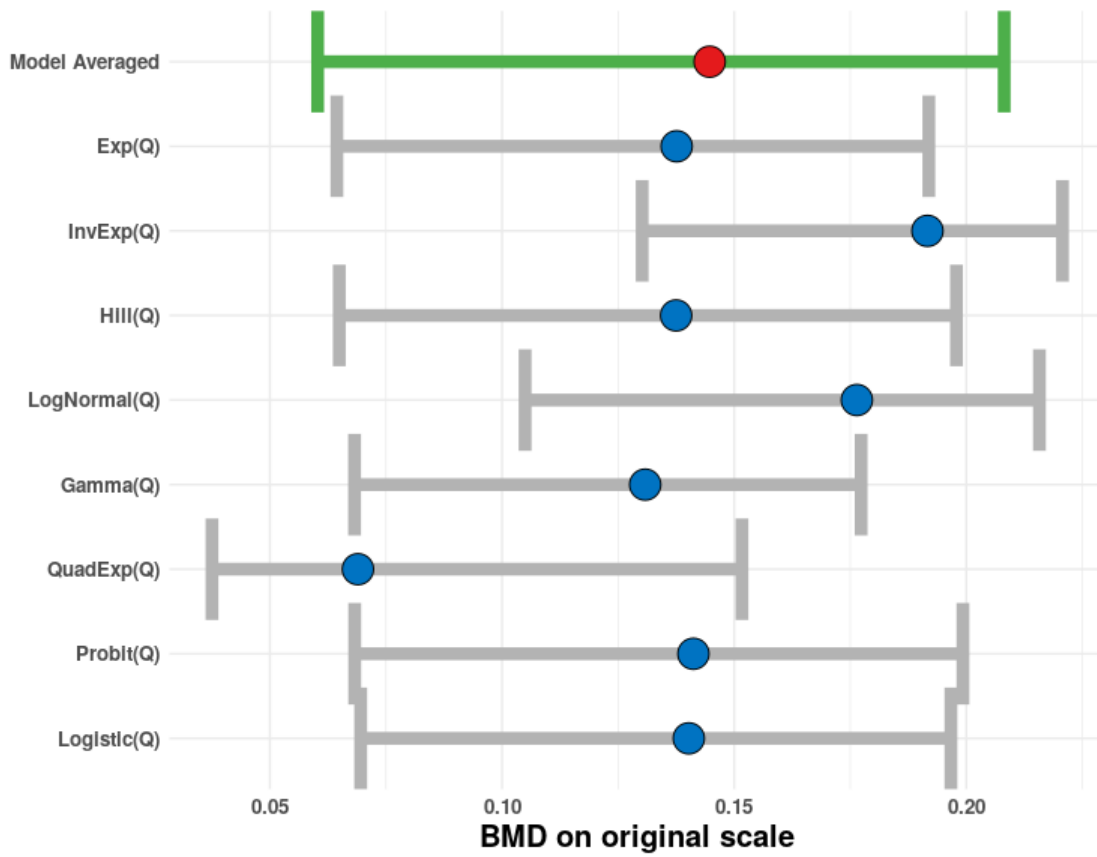

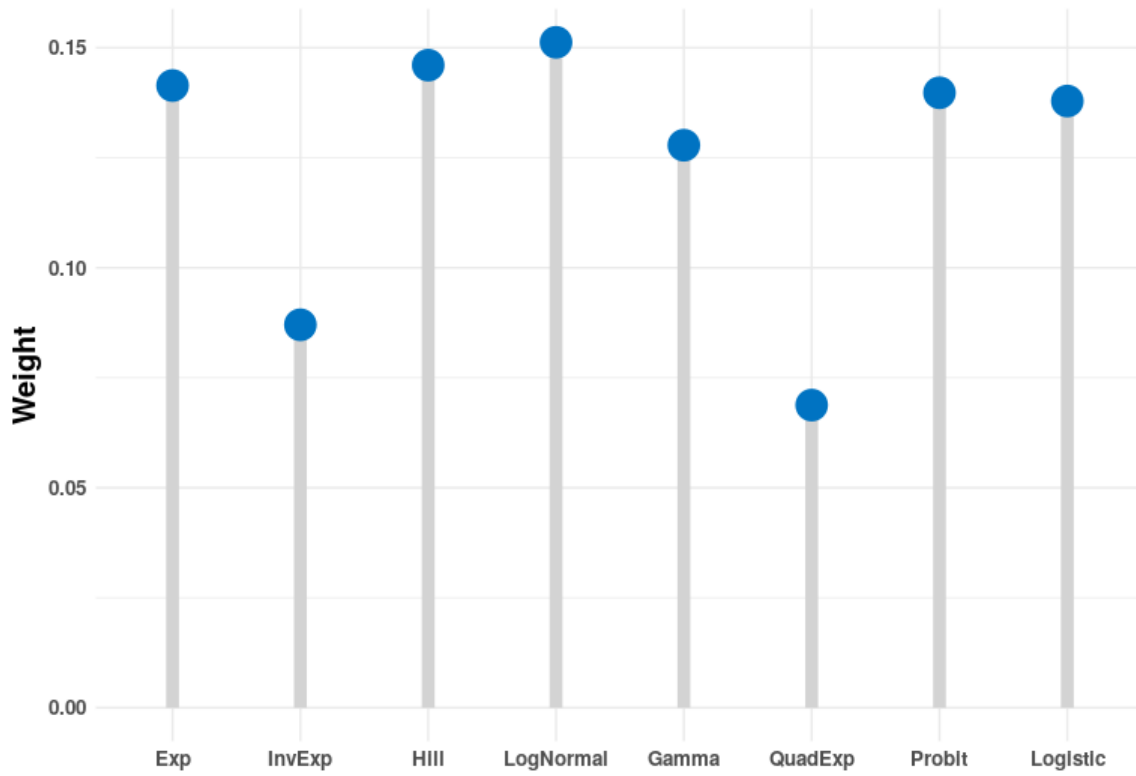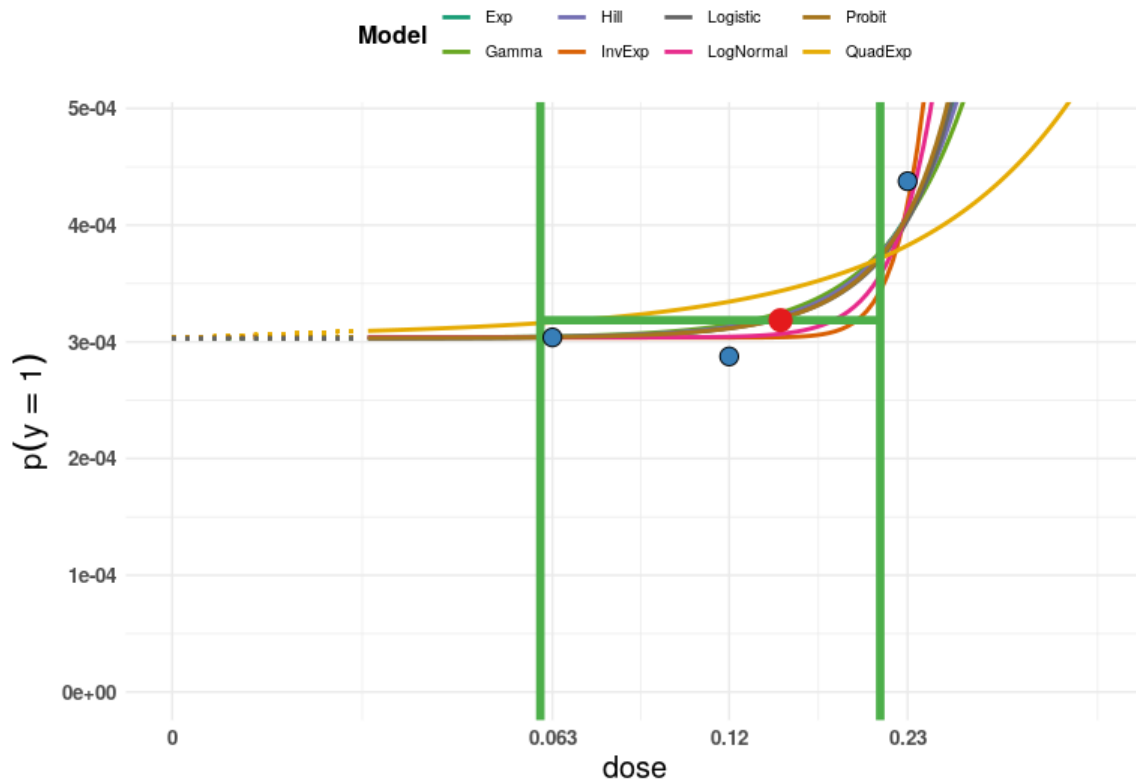

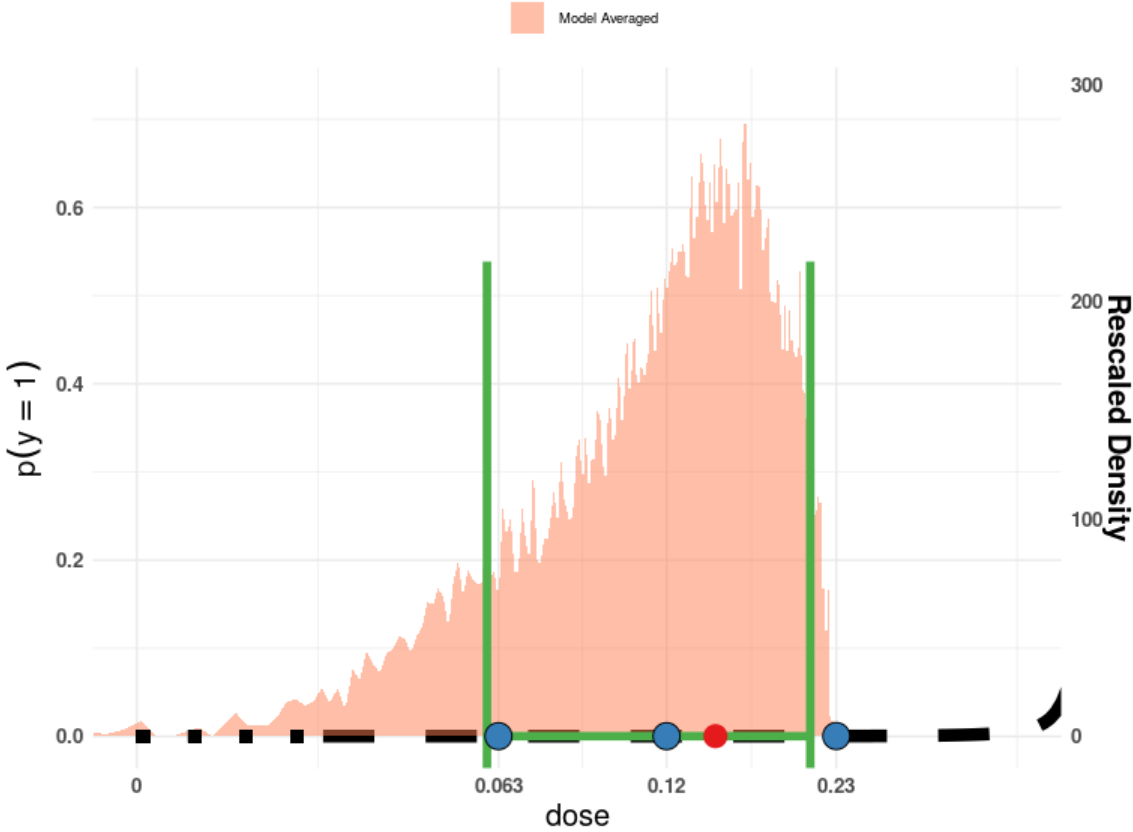

## Hsueh et al. (2009) chronic kidney disease, relative BMR 5%

### Data Description

The endpoint to be analyzed is: Adj.cases for chronic kidney disease

Data used for analysis:

| Exposure, $\mu\text{g.kg.bw.per.day}$ | Adj.cases | N      |
|---------------------------------------|-----------|--------|
| 0.13                                  | 18        | 655022 |
| 0.36                                  | 27        | 681223 |
| 0.46                                  | 80        | 663755 |

The 'Value for CES' is set to 1.37e-06.

Extended dose range is not applied.

Informative background prior: min: 0.00002721; the most likely: 0.00002748; max: 0.00002775. Shape parameter is applied.

The 'Sampling Method' is set to Bridge Sampling.

### Results

*Information pertaining to this endpoint.*

### Goodness of Fit

Best fitting model fits sufficiently well (Bayes factor is 4.59e-01).

**Model Averaged BMD**

| Model          | Type | BMDL  | BMD   | BMDU  |
|----------------|------|-------|-------|-------|
| Model Averaged | BS   | 0.119 | 0.275 | 0.397 |

**Estimated BMDs per model**

| Model | BMDL  | BMD   | BMDU  | Model Weights | Converged |
|-------|-------|-------|-------|---------------|-----------|
| E4_Q  | 0.187 | 0.266 | 0.338 | 0.137         | 1         |
| IE4_Q | 0.248 | 0.324 | 0.411 | 0.180         | 1         |
| H4_Q  | 0.188 | 0.267 | 0.338 | 0.140         | 1         |
| LN4_Q | 0.223 | 0.302 | 0.419 | 0.299         | 0         |
| G4_Q  | 0.083 | 0.206 | 0.262 | 0.098         | 0         |
| QE4_Q | 0.018 | 0.036 | 0.056 | 0.000         | 1         |
| P4_Q  | 0.137 | 0.211 | 0.325 | 0.073         | 0         |
| L4_Q  | 0.118 | 0.208 | 0.330 | 0.073         | 0         |



**Plots of Fitted Models**

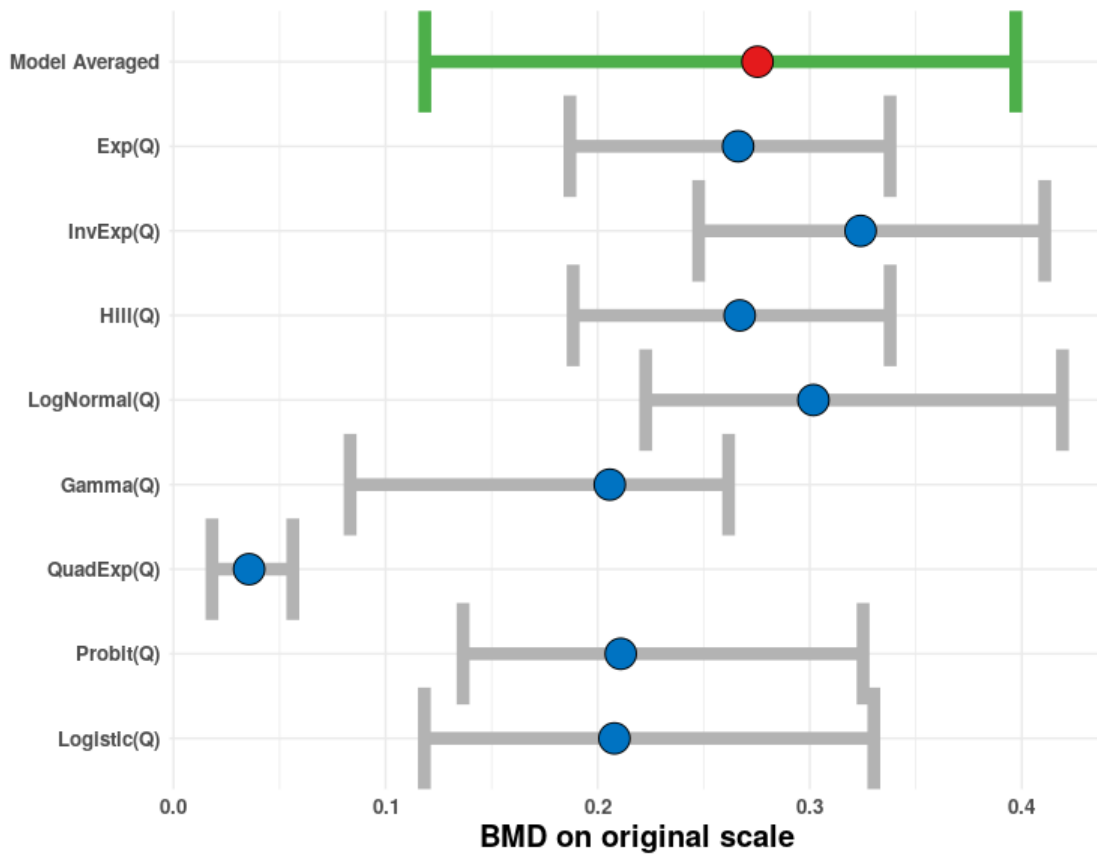

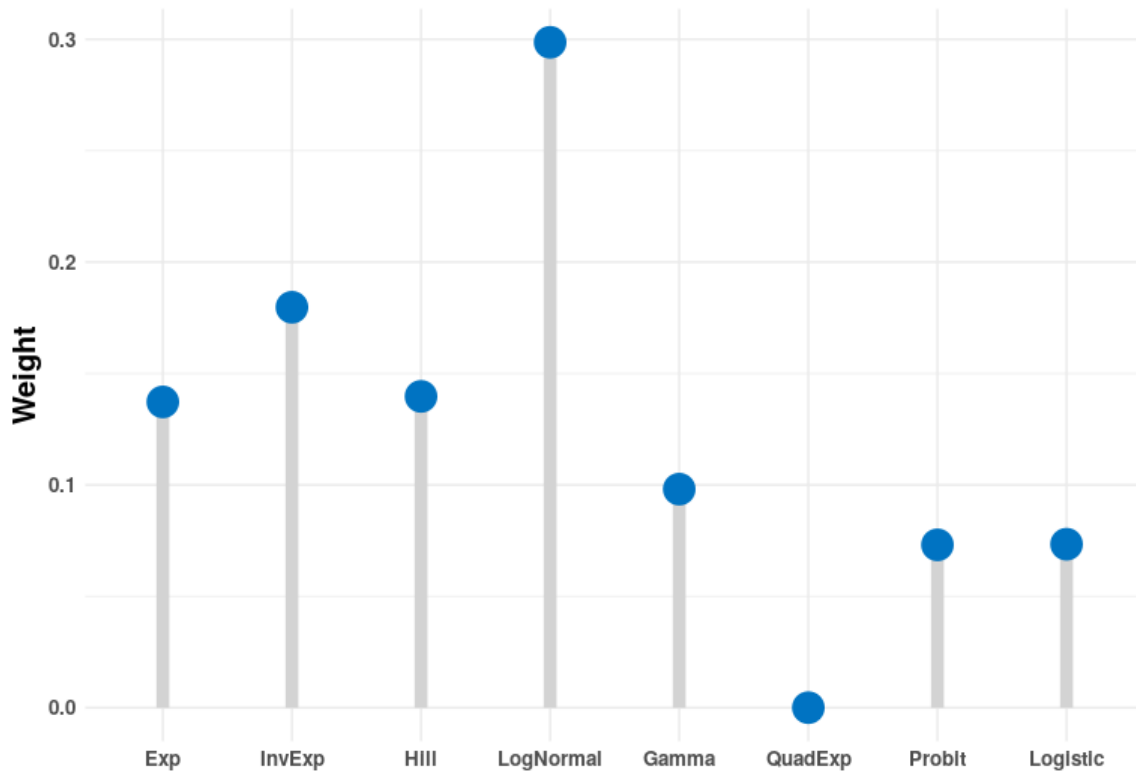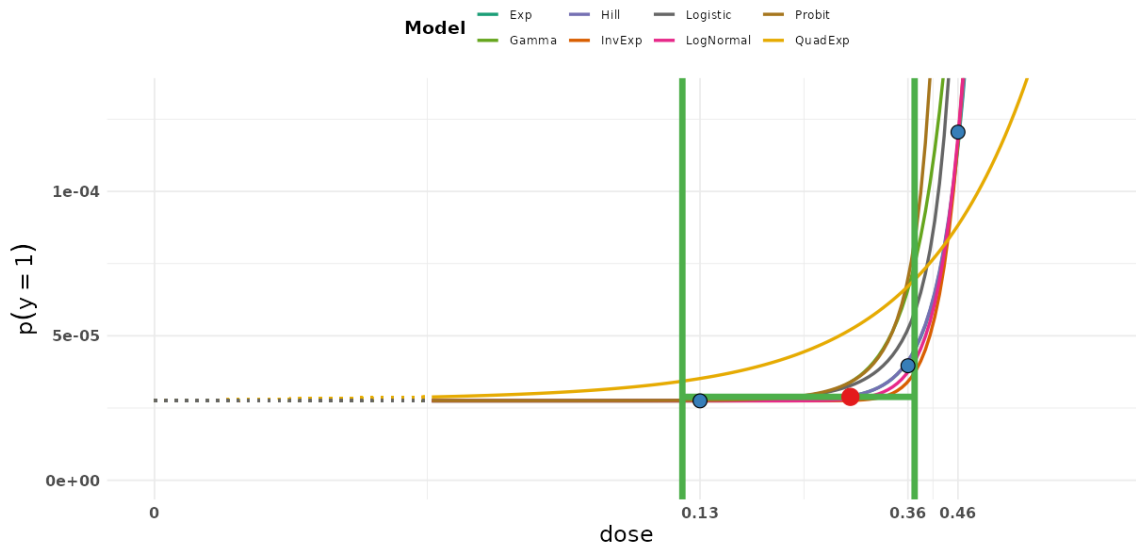

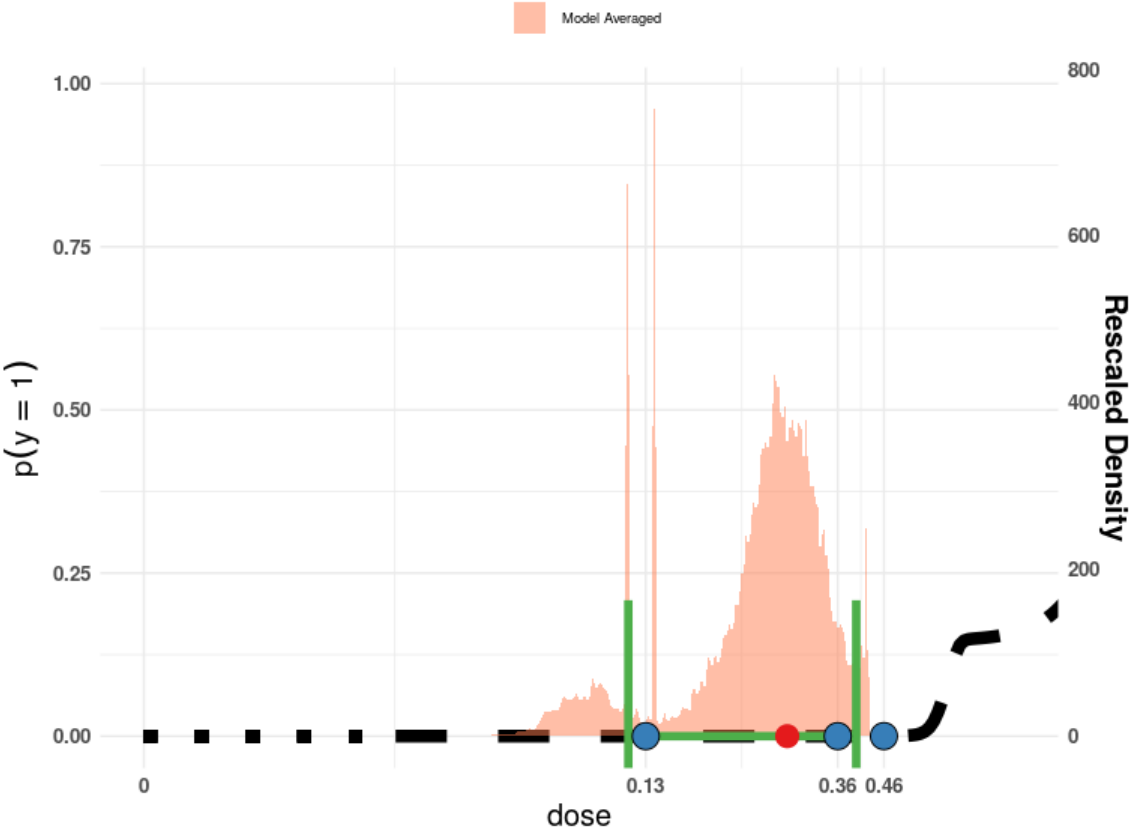

## James et al. (2015) ischemic heart disease, relative BMR 5%

### Data Description

The endpoint to be analyzed is: Adj.cases for ischemic heart disease

Data used for analysis:

| Exposure.µg.kg.bw.per.day | Adj.cases | Person.years |
|---------------------------|-----------|--------------|
| 0.34                      | 58        | 4806         |
| 0.76                      | 20        | 1335         |
| 0.97                      | 14        | 534          |
| 1.30                      | 4         | 98           |

The 'Value for CES' is set to 0.00061078.

Extended dose range is not applied.

Informative background prior: min: 0.01194757; the most likely: 0.01206825; max: 0.01218893. Shape parameter is applied.

The 'Sampling Method' is set to Bridge Sampling.

### Results

*Information pertaining to this endpoint.*

#### Goodness of Fit

Best fitting model fits sufficiently well (Bayes factor is 2.11e-02).

#### Model Averaged BMD

| Model          | Type | BMDL  | BMD   | BMDU  |
|----------------|------|-------|-------|-------|
| Model Averaged | BS   | 0.165 | 0.483 | 0.921 |

#### Estimated BMDs per model

| Model | BMDL  | BMD   | BMDU  | Model Weights | Converged |
|-------|-------|-------|-------|---------------|-----------|
| E4_Q  | 0.199 | 0.473 | 0.921 | 0.144         | 1         |
| IE4_Q | 0.361 | 0.626 | 1.005 | 0.103         | 1         |
| H4_Q  | 0.191 | 0.468 | 0.898 | 0.148         | 1         |
| LN4_Q | 0.291 | 0.568 | 0.935 | 0.137         | 1         |
| G4_Q  | 0.188 | 0.467 | 0.756 | 0.168         | 1         |
| QE4_Q | 0.089 | 0.220 | 1.009 | 0.078         | 1         |
| P4_Q  | 0.175 | 0.442 | 0.923 | 0.110         | 1         |
| L4_Q  | 0.178 | 0.441 | 0.951 | 0.112         | 1         |

**Plots of Fitted Models**

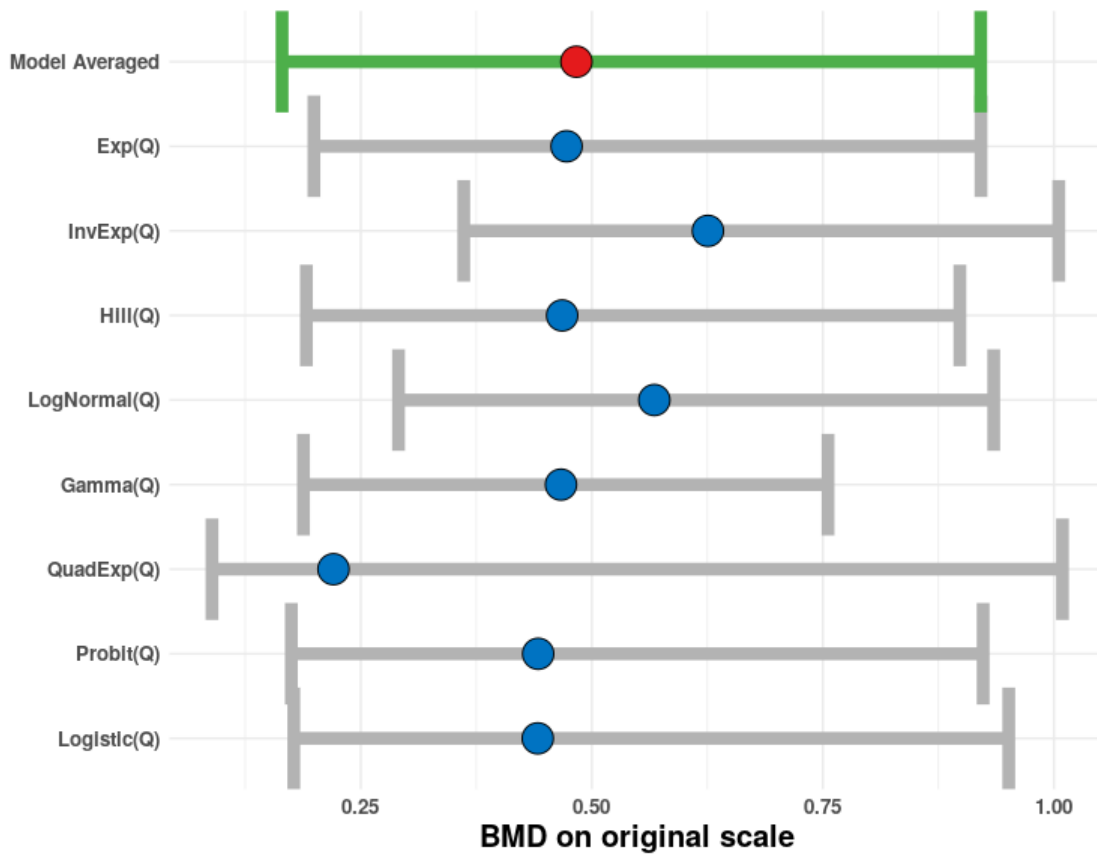

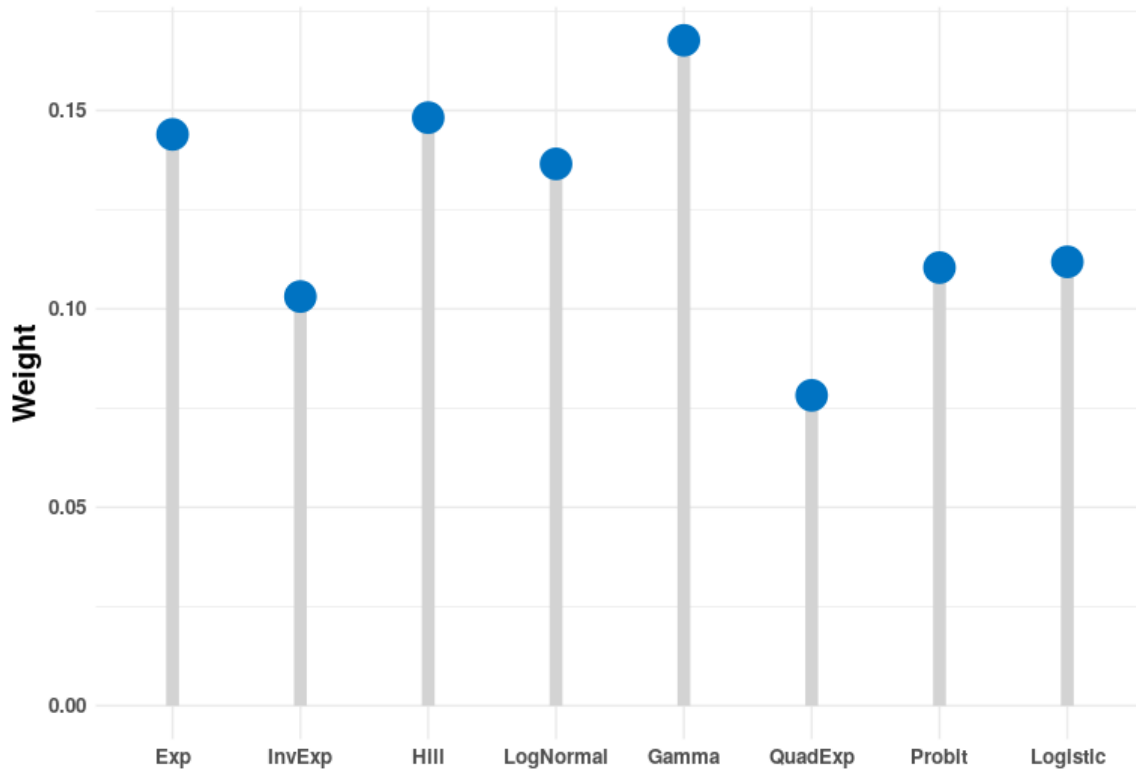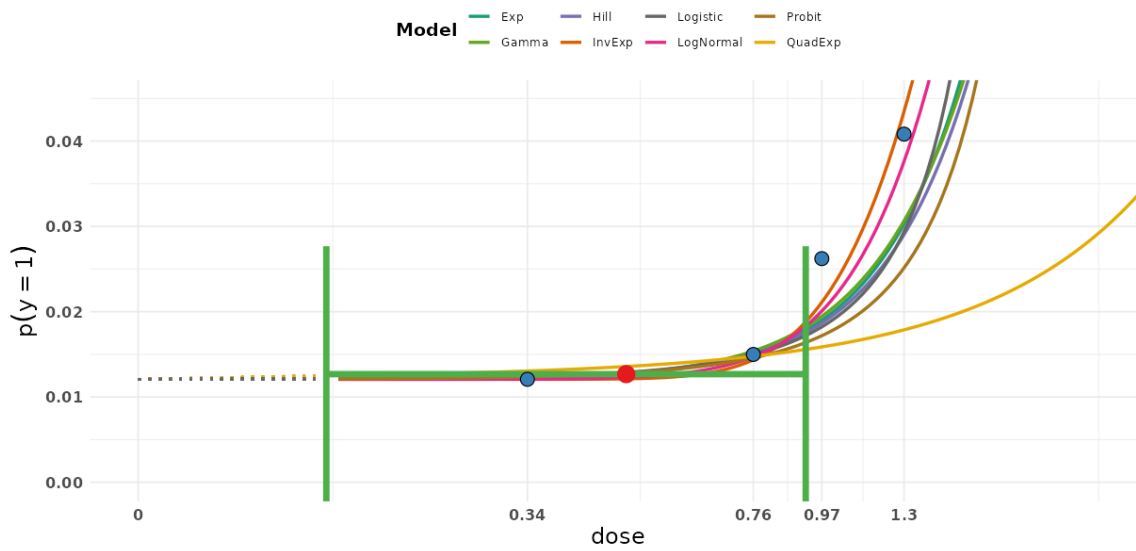

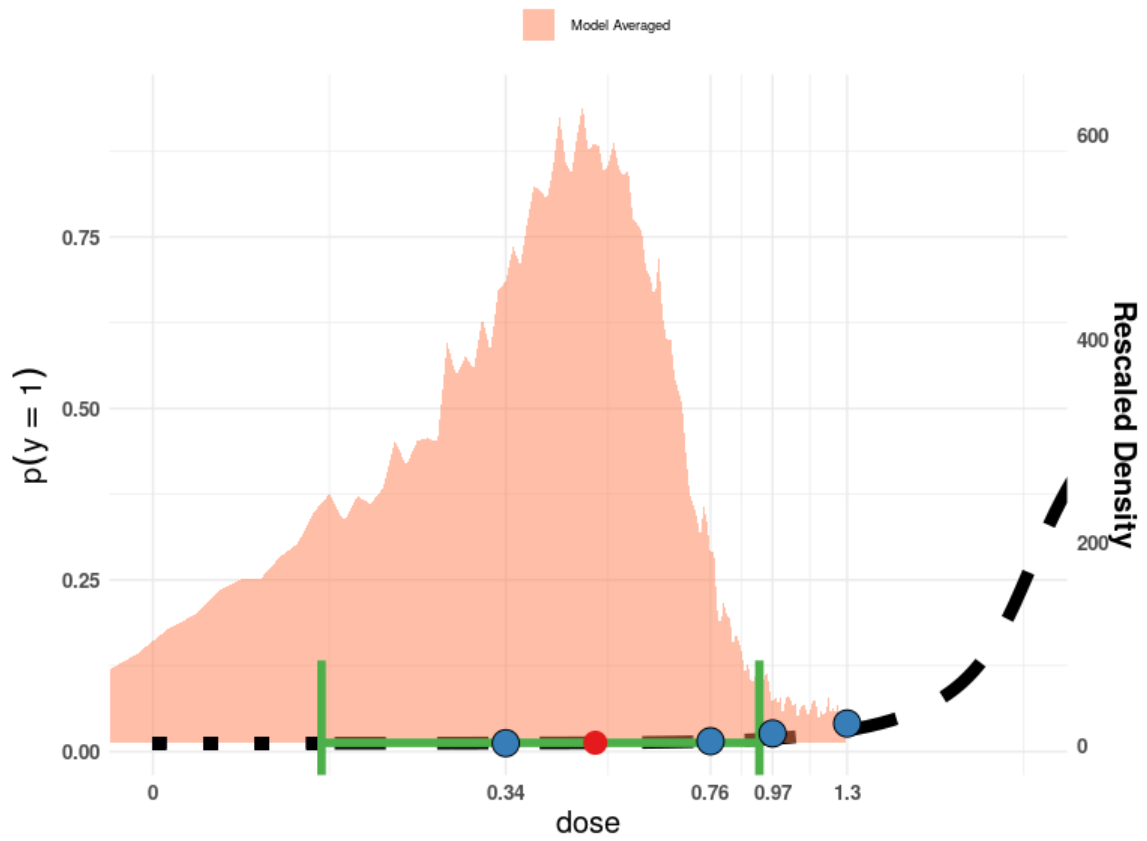

## Leonardi et al. (2012) skin cancer, relative BMR 5%

### Data Description

The endpoint to be analyzed is: Adj.cases for skin cancer

Data used for analysis:

| Exposure | Adj.cases | N     |
|----------|-----------|-------|
| 0.12     | 59        | 4e+05 |
| 0.13     | 82        | 4e+05 |
| 0.20     | 70        | 4e+05 |
| 0.39     | 101       | 4e+05 |
| 2.11     | 179       | 4e+05 |

The 'Value for CES' is set to 7.38e-06.

Extended dose range is not applied.

Informative background prior: min: 0.00014603; the most likely: 0.00014750; max: 0.00014898. Shape parameter is applied.

The 'Sampling Method' is set to Bridge Sampling.

### Results

*Information pertaining to this endpoint.*

#### Goodness of Fit

Best fitting model fits sufficiently well (Bayes factor is 9.72e-06).

#### Model Averaged BMD

| Model          | Type | BMDL  | BMD   | BMDU  |
|----------------|------|-------|-------|-------|
| Model Averaged | BS   | 0.011 | 0.047 | 0.079 |

#### Estimated BMDs per model

| Model | BMDL  | BMD   | BMDU  | Model Weights | Converged |
|-------|-------|-------|-------|---------------|-----------|
| E4_Q  | 0.011 | 0.030 | 0.076 | 0.203         | 1         |
| IE4_Q | 0.020 | 0.046 | 0.100 | 0.003         | 1         |
| H4_Q  | 0.011 | 0.030 | 0.078 | 0.204         | 1         |
| LN4_Q | 0.016 | 0.039 | 0.088 | 0.024         | 1         |
| G4_Q  | 0.686 | 1.017 | 1.195 | 0.000         | 0         |
| QE4_Q | 0.044 | 0.054 | 0.081 | 0.440         | 1         |
| P4_Q  | 0.006 | 0.021 | 0.065 | 0.066         | 1         |
| L4_Q  | 0.006 | 0.021 | 0.070 | 0.061         | 1         |



**Plots of Fitted Models**

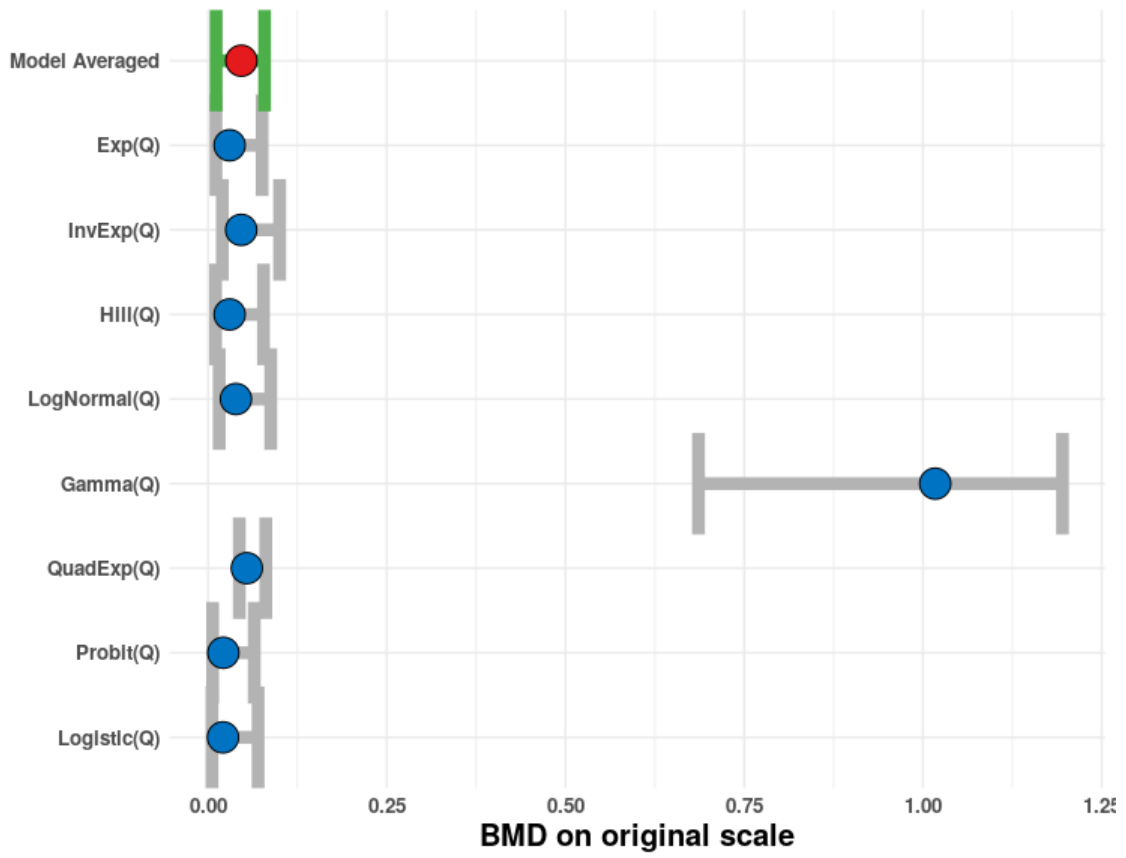

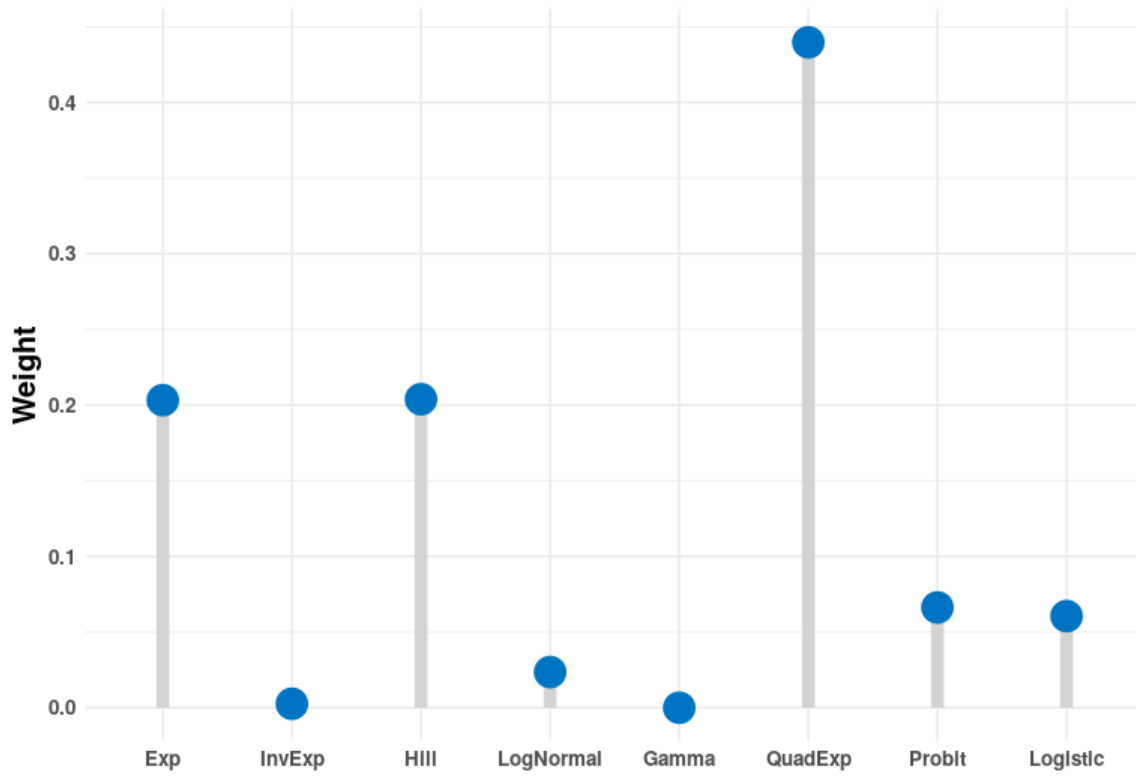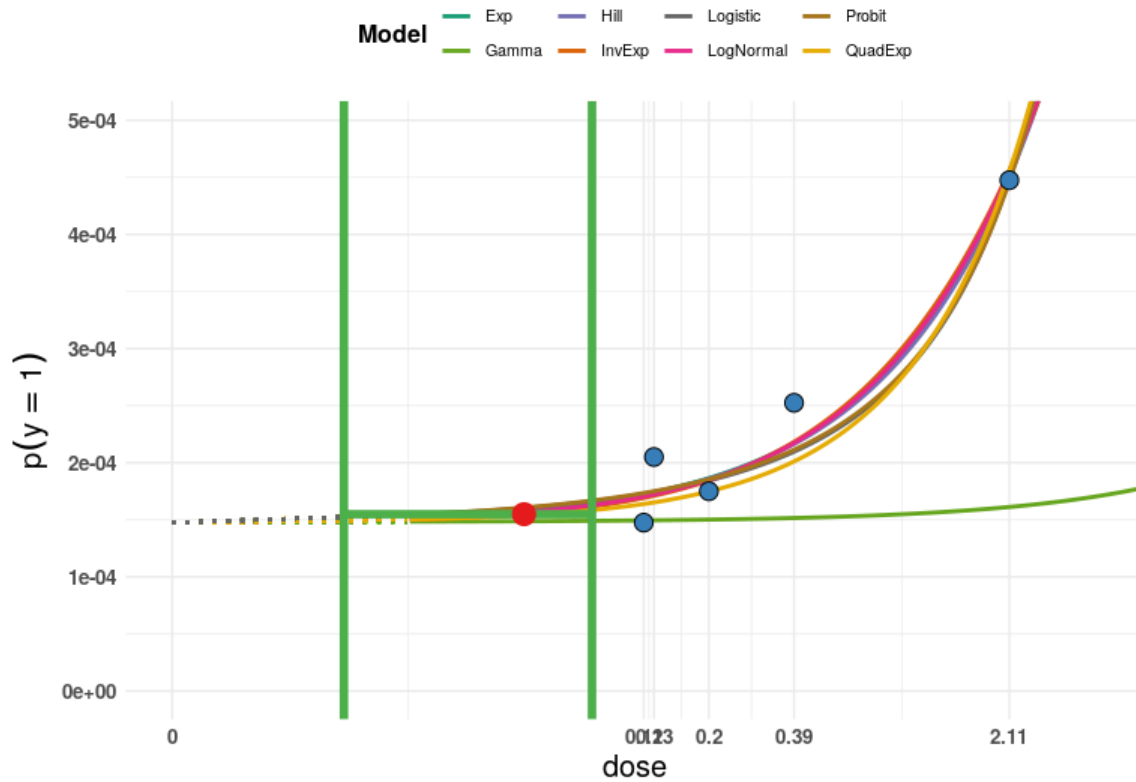

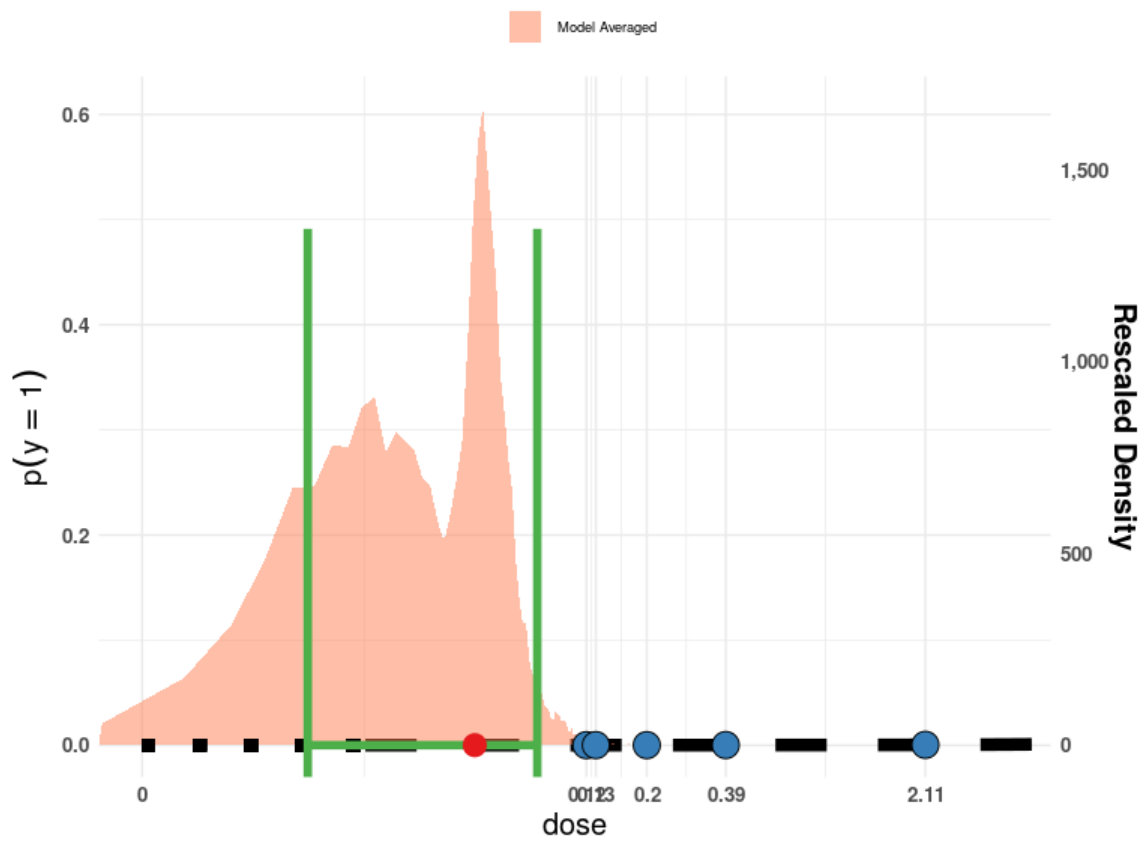

## Milton et al. (2005) neonatal death, relative BMR 5%

### Data Description

The endpoint to be analyzed is: Adj.cases for neonatal death

Data used for analysis:

| Exposure.µg.kg.bw.per.day | Adj.cases | N   |
|---------------------------|-----------|-----|
| 2.91                      | 19        | 176 |
| 6.58                      | 14        | 53  |
| 8.36                      | 53        | 304 |

The 'Value for CES' is set to 0.006050955.

Extended dose range is not applied.

Informative background prior: min: 0.10255682; the most likely: 0.107954545; max: 0.113352273. Shape parameter is applied.

The 'Sampling Method' is set to Bridge Sampling.

### Results

*Information pertaining to this endpoint.*

The results do not fulfill the EFSA BMD guidance (EFSA Scientific Committee, 2022) criteria since none of the candidate models fit the data sufficiently well.

### Goodness of Fit

None of the models provide an adequate fit do the data (Bayes factor is 1.08e+01).

### Model Averaged BMD

| Model          | Type | BMDL  | BMD   | BMDU  |
|----------------|------|-------|-------|-------|
| Model Averaged | BS   | 0.613 | 2.305 | 5.661 |

### Estimated BMDs per model

| Model | BMDL  | BMD   | BMDU  | Model Weights | Converged |
|-------|-------|-------|-------|---------------|-----------|
| E4_Q  | 0.575 | 2.494 | 5.397 | 0.120         | 1         |
| IE4_Q | 1.329 | 3.833 | 7.052 | 0.091         | 1         |
| H4_Q  | 0.584 | 2.525 | 5.884 | 0.133         | 1         |
| LN4_Q | 0.956 | 3.375 | 6.512 | 0.106         | 1         |
| G4_Q  | 0.734 | 2.586 | 4.970 | 0.154         | 1         |
| QE4_Q | 0.562 | 1.155 | 2.448 | 0.201         | 1         |
| P4_Q  | 0.518 | 2.544 | 5.266 | 0.097         | 1         |
| L4_Q  | 0.532 | 2.527 | 5.391 | 0.099         | 1         |

**Plots of Fitted Models**

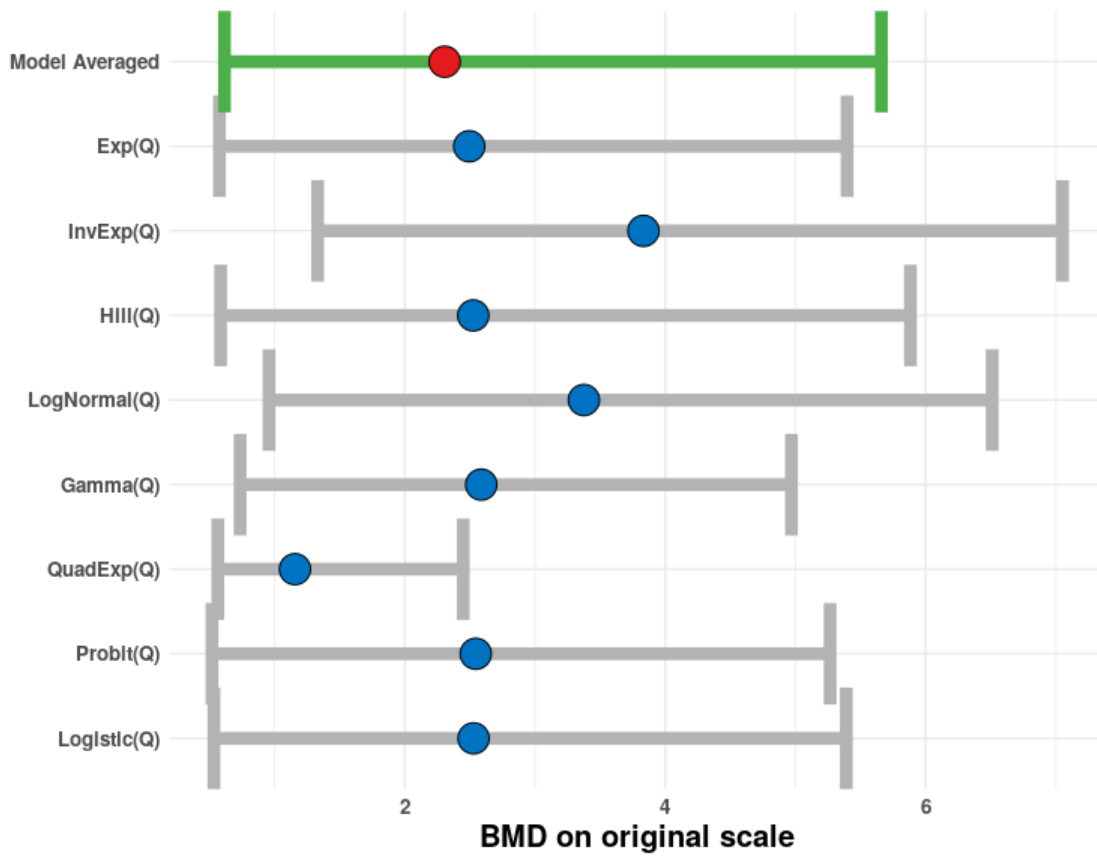

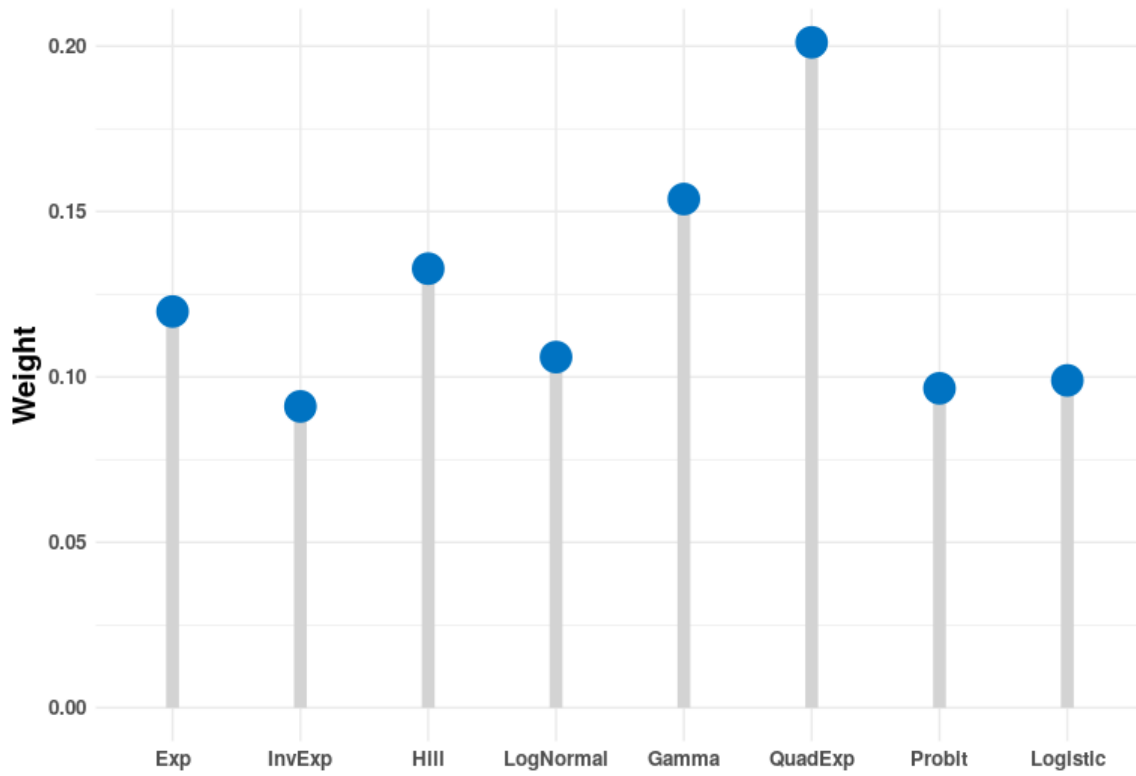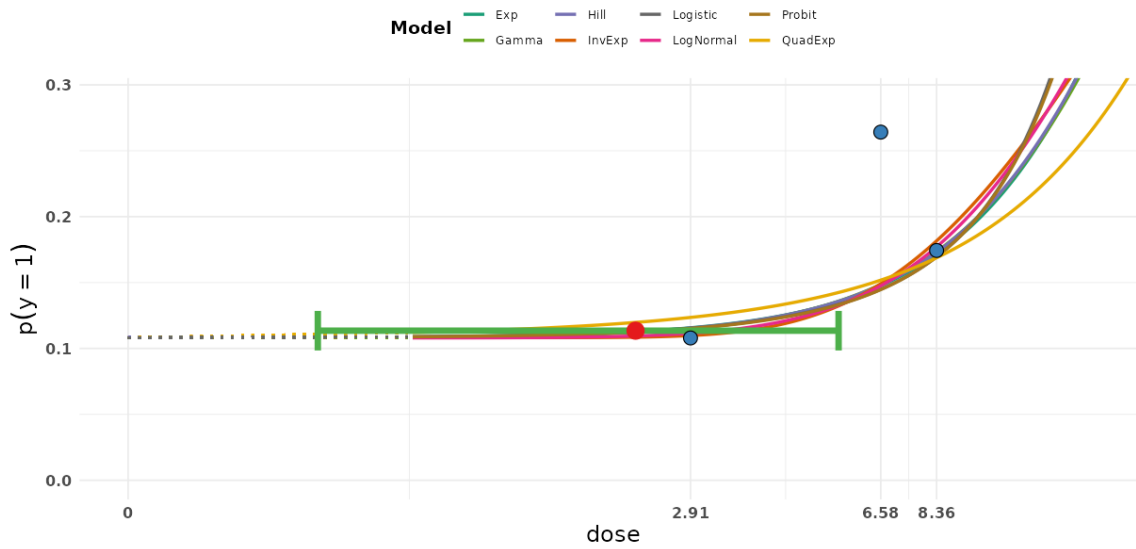

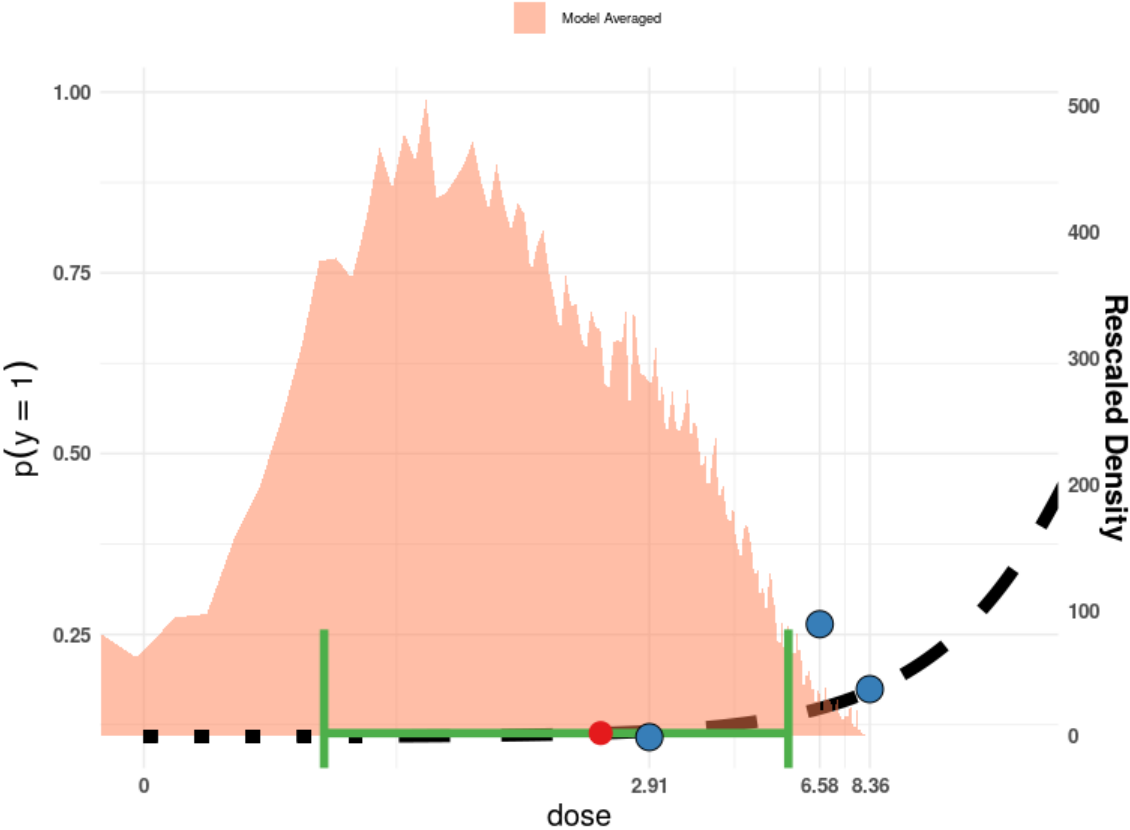

## Milton et al. (2005) spontaneous abortion, relative BMR 5%

### Data Description

The endpoint to be analyzed is: Adj.cases for spontaneous abortion

Data used for analysis:

| Exposure.µg.kg.bw.per.day | Adj.cases | N   |
|---------------------------|-----------|-----|
| 2.91                      | 17        | 176 |
| 6.58                      | 11        | 53  |
| 8.36                      | 63        | 304 |

The 'Value for CES' is set to 0.00534591.

Extended dose range is not applied.

Informative background prior: min: 0.09562500; the most likely; 0.09659091; max: 0.09755682. Shape parameter is applied.

The 'Sampling Method' is set to Bridge Sampling.

### Results

*Information pertaining to this endpoint.*

### Goodness of Fit

Best fitting model fits sufficiently well (Bayes factor is 1.56e+00).

### Model Averaged BMD

| Model          | Type | BMDL  | BMD  | BMDU  |
|----------------|------|-------|------|-------|
| Model Averaged | BS   | 0.579 | 2.66 | 5.543 |

### Estimated BMDs per model

| Model | BMDL  | BMD   | BMDU  | Model Weights | Converged |
|-------|-------|-------|-------|---------------|-----------|
| E4_Q  | 0.727 | 2.553 | 5.085 | 0.122         | 1         |
| IE4_Q | 1.613 | 3.799 | 6.110 | 0.133         | 1         |
| H4_Q  | 0.743 | 2.559 | 5.102 | 0.126         | 1         |
| LN4_Q | 1.317 | 3.554 | 6.240 | 0.141         | 1         |
| G4_Q  | 0.877 | 2.619 | 4.612 | 0.188         | 0         |
| QE4_Q | 0.383 | 0.778 | 1.450 | 0.106         | 1         |
| P4_Q  | 0.615 | 2.747 | 6.037 | 0.094         | 0         |
| L4_Q  | 0.593 | 2.491 | 5.460 | 0.090         | 1         |



**Plots of Fitted Models**

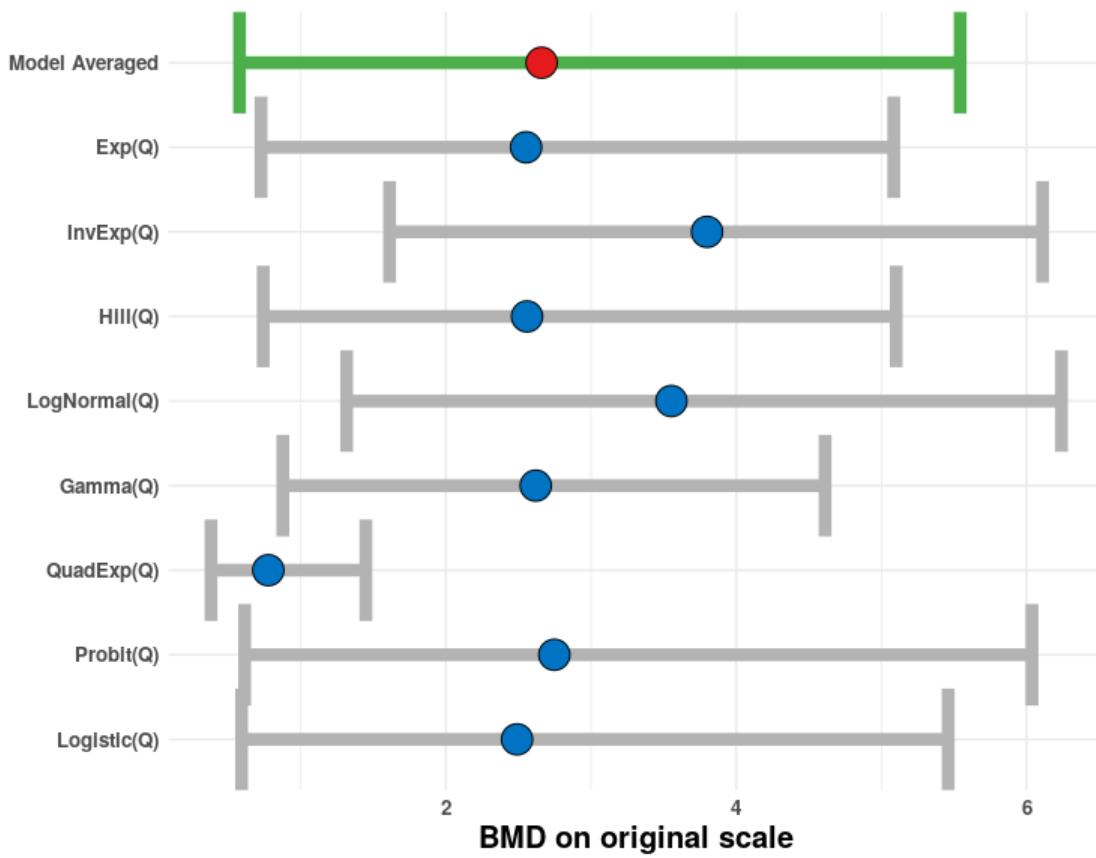

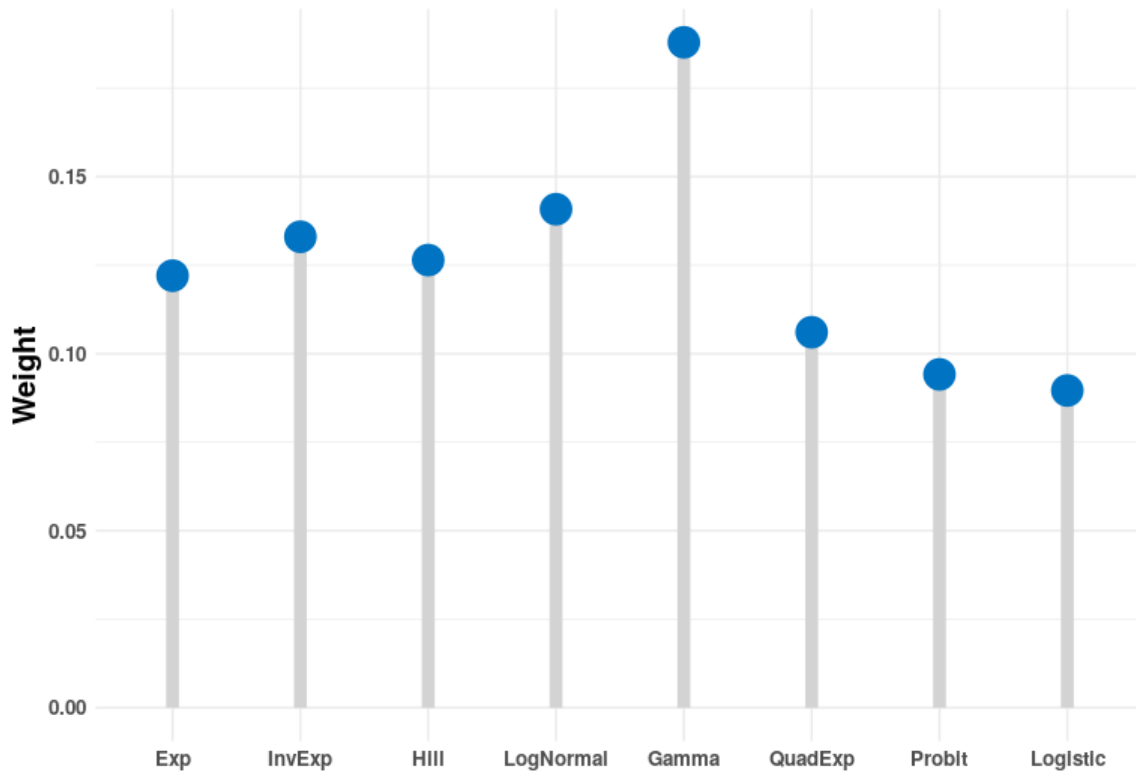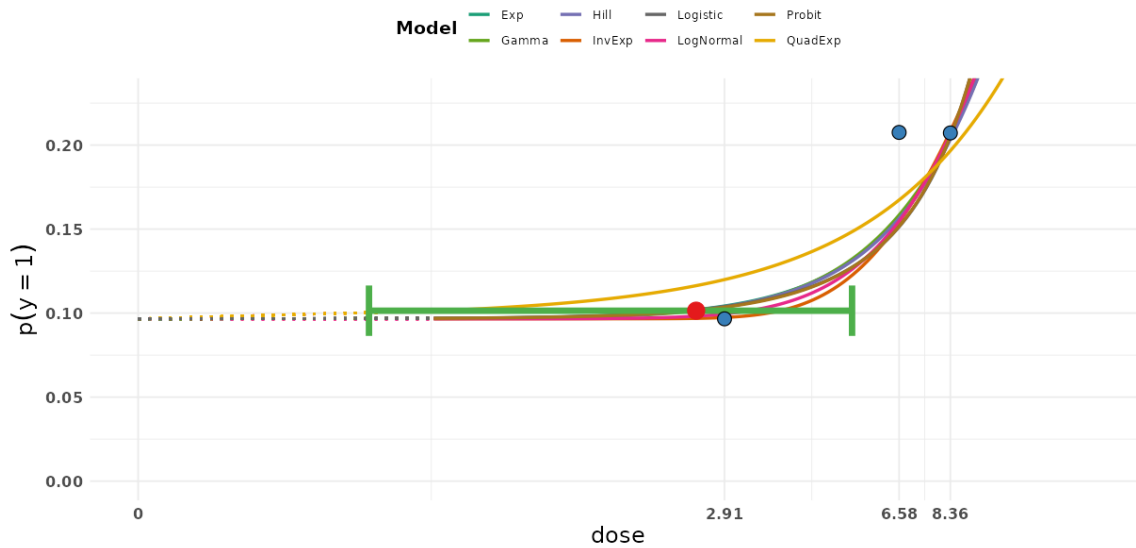

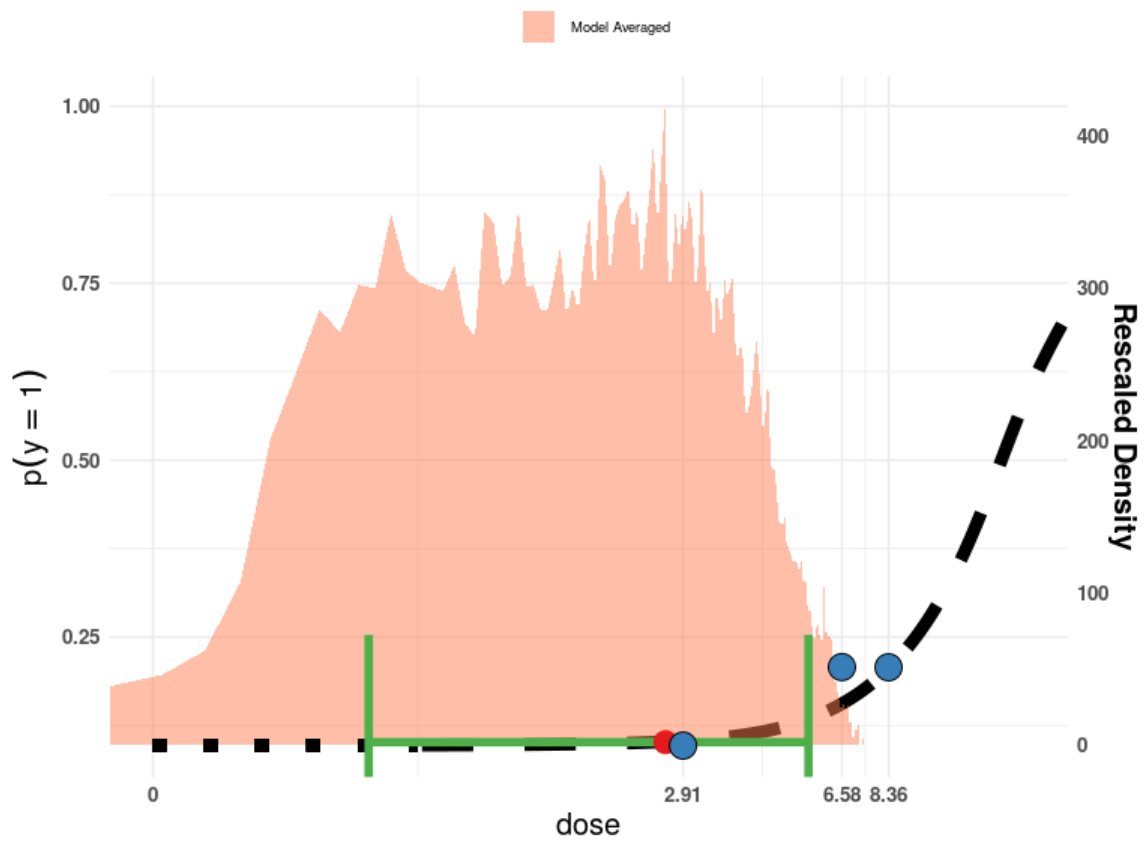

## Milton et al. (2005) stillbirth, relative BMR 5%

### Data Description

The endpoint to be analyzed is: Adj.cases for stillbirth

Data used for analysis:

| Exposure.µg.kg.bw.per.day | Adj.cases | N   |
|---------------------------|-----------|-----|
| 2.91                      | 11        | 176 |
| 6.58                      | 4         | 53  |
| 8.36                      | 48        | 304 |

The 'Value for CES' is set to 0.00333333.

Extended dose range is not applied.

Informative background prior: min: 0.06187500; the most likely; 0.06250000; max: 0.06312500. Shape parameter is applied.

The 'Sampling Method' is set to Bridge Sampling.

### Results

*Information pertaining to this endpoint.*

### Goodness of Fit

Best fitting model fits sufficiently well (Bayes factor is 9.91e-01).

### Model Averaged BMD

| Model          | Type | BMDL  | BMD   | BMDU  |
|----------------|------|-------|-------|-------|
| Model Averaged | BS   | 0.867 | 4.077 | 6.709 |

### Estimated BMDs per model

| Model | BMDL  | BMD   | BMDU  | Model Weights | Converged |
|-------|-------|-------|-------|---------------|-----------|
| E4_Q  | 1.071 | 3.693 | 6.234 | 0.127         | 1         |
| IE4_Q | 2.565 | 5.474 | 7.229 | 0.186         | 1         |
| H4_Q  | 1.094 | 3.642 | 6.354 | 0.124         | 1         |
| LN4_Q | 2.035 | 4.784 | 6.785 | 0.181         | 1         |
| G4_Q  | 1.117 | 3.344 | 5.231 | 0.133         | 1         |
| QE4_Q | 0.327 | 0.693 | 1.360 | 0.041         | 1         |
| P4_Q  | 1.031 | 3.549 | 5.842 | 0.100         | 1         |
| L4_Q  | 1.197 | 3.883 | 6.321 | 0.108         | 1         |

Plots of Fitted Models

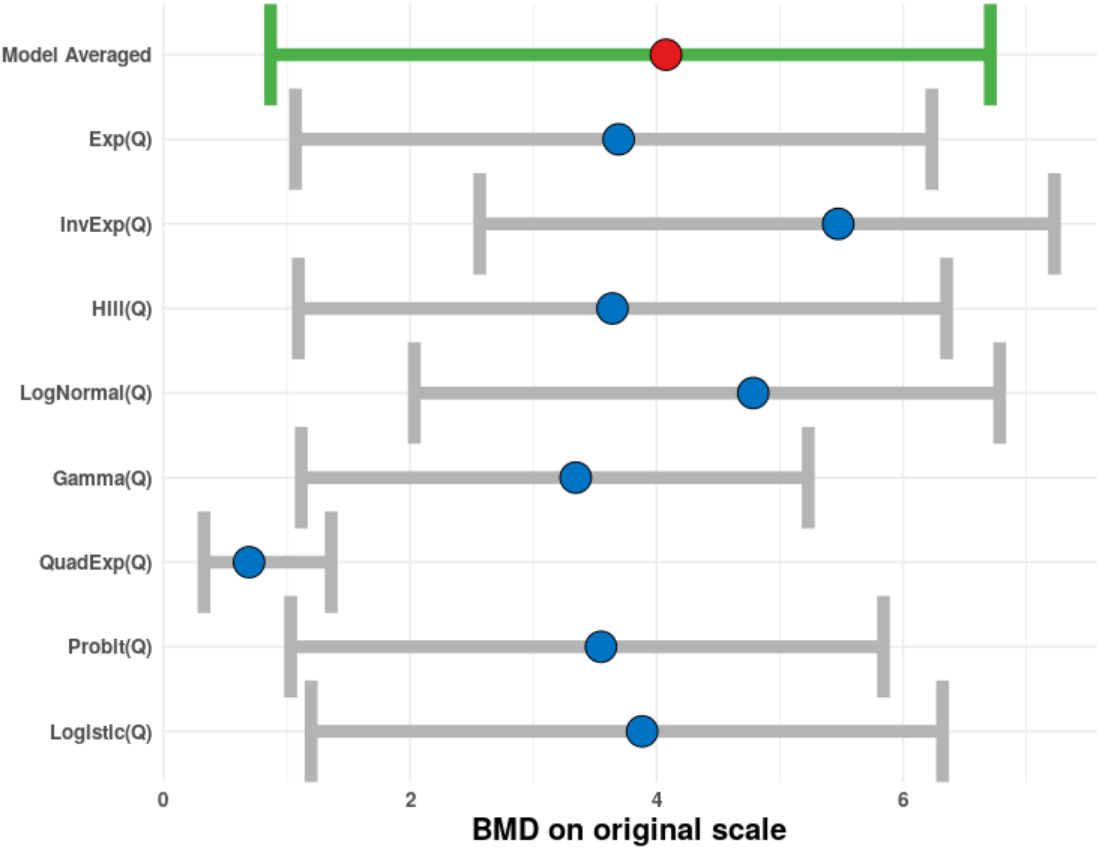

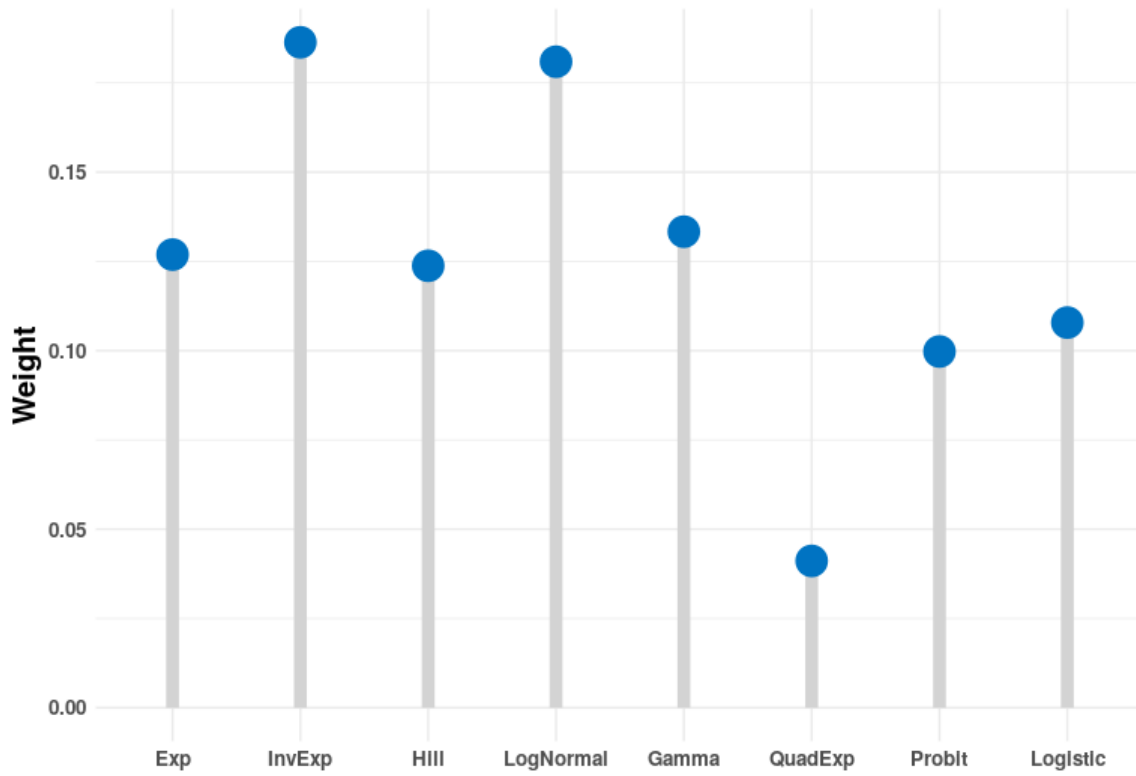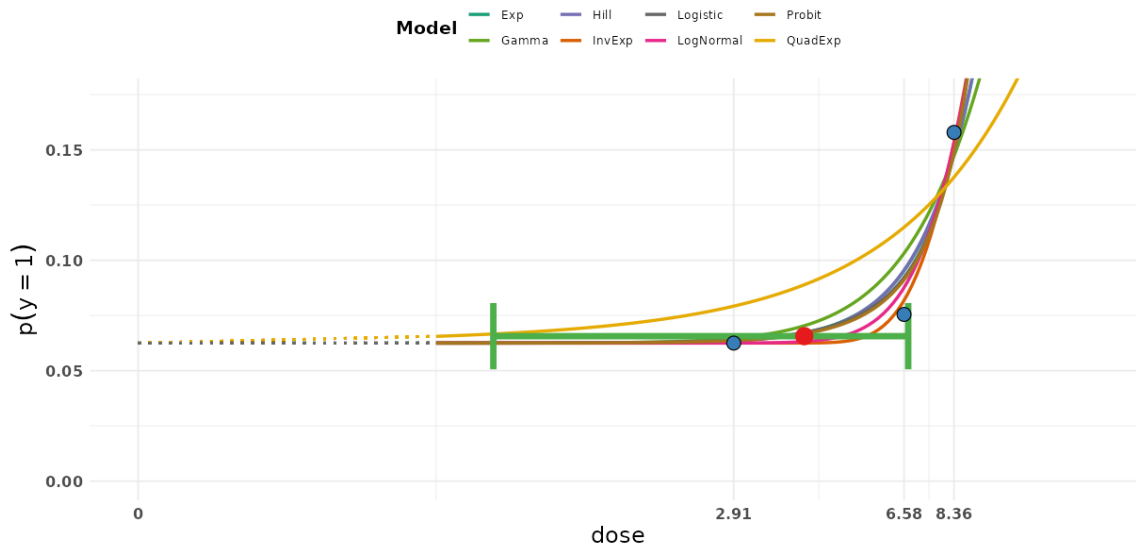

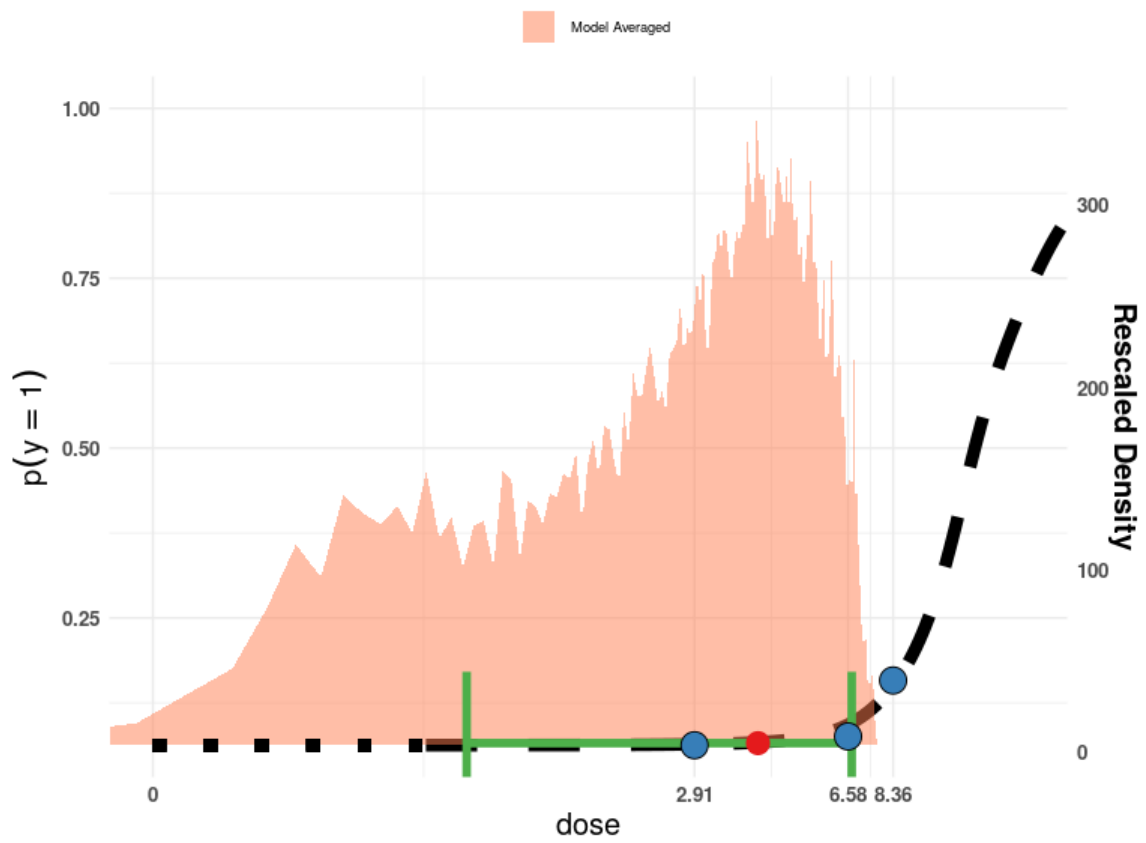

## Moon et al. (2013) ischemic heart disease, relative BMR 5%

### Data Description

The endpoint to be analyzed is: Adj.cases for ischemic heart disease

Data used for analysis:

| Exposure.µg.kg.bw.per.day | Adj.cases | Person.years |
|---------------------------|-----------|--------------|
| 0.089                     | 207       | 12447        |
| 0.150                     | 212       | 12136        |
| 0.250                     | 187       | 11805        |
| 0.440                     | 240       | 11075        |

The 'Value for CES' is set to 0.00084559.

Extended dose range is not applied.

Informative background prior: min: 0.01646421; the most likely; 0.01663051; max: 0.01679682. Shape parameter is applied.

The 'Sampling Method' is set to Bridge Sampling.

### Results

*Information pertaining to this endpoint.*

#### Goodness of Fit

Best fitting model fits sufficiently well (Bayes factor is 9.18e-03).

#### Model Averaged BMD

| Model          | Type | BMDL  | BMD   | BMDU  |
|----------------|------|-------|-------|-------|
| Model Averaged | BS   | 0.154 | 0.306 | 0.402 |

#### Estimated BMDs per model

| Model | BMDL  | BMD   | BMDU  | Model Weights | Converged |
|-------|-------|-------|-------|---------------|-----------|
| E4_Q  | 0.155 | 0.294 | 0.386 | 0.129         | 1         |
| IE4_Q | 0.256 | 0.367 | 0.416 | 0.116         | 1         |
| H4_Q  | 0.170 | 0.298 | 0.399 | 0.140         | 1         |
| LN4_Q | 0.230 | 0.341 | 0.413 | 0.155         | 1         |
| G4_Q  | 0.155 | 0.286 | 0.367 | 0.136         | 1         |
| QE4_Q | 0.107 | 0.180 | 0.344 | 0.070         | 1         |
| P4_Q  | 0.158 | 0.297 | 0.386 | 0.128         | 1         |
| L4_Q  | 0.162 | 0.294 | 0.389 | 0.127         | 1         |



Plots of Fitted Models

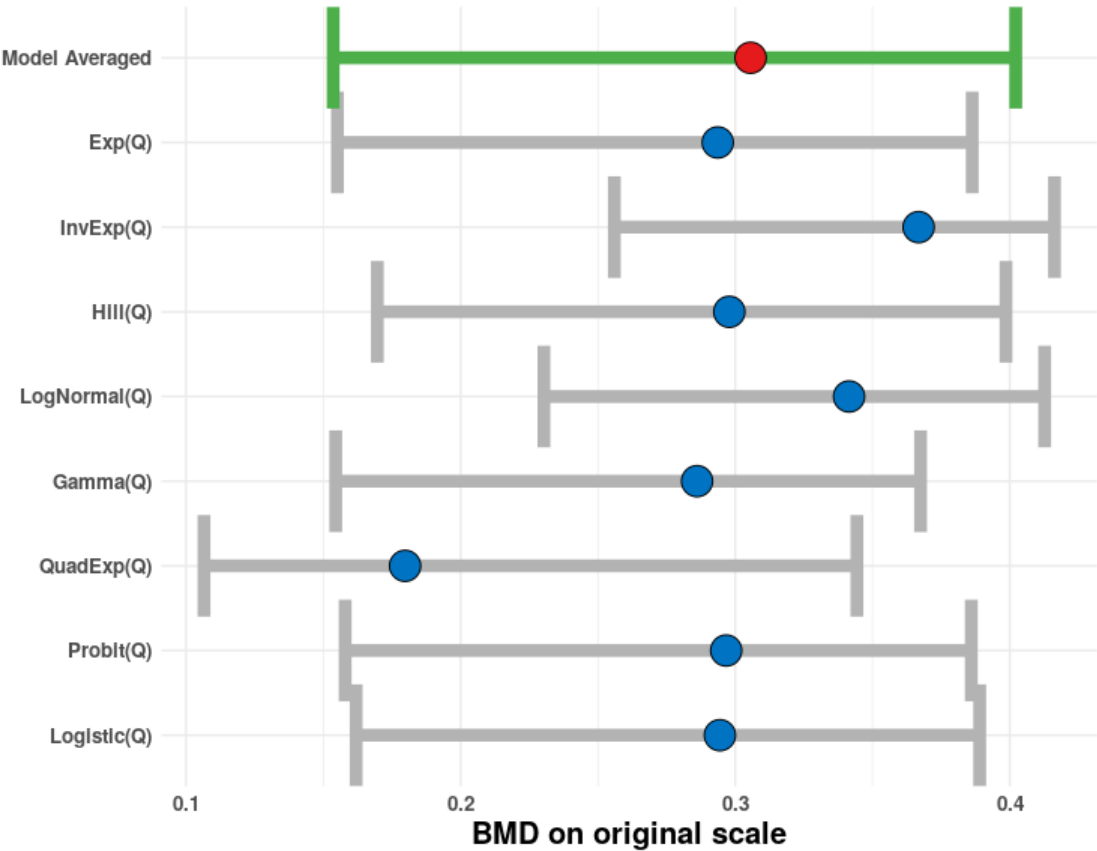

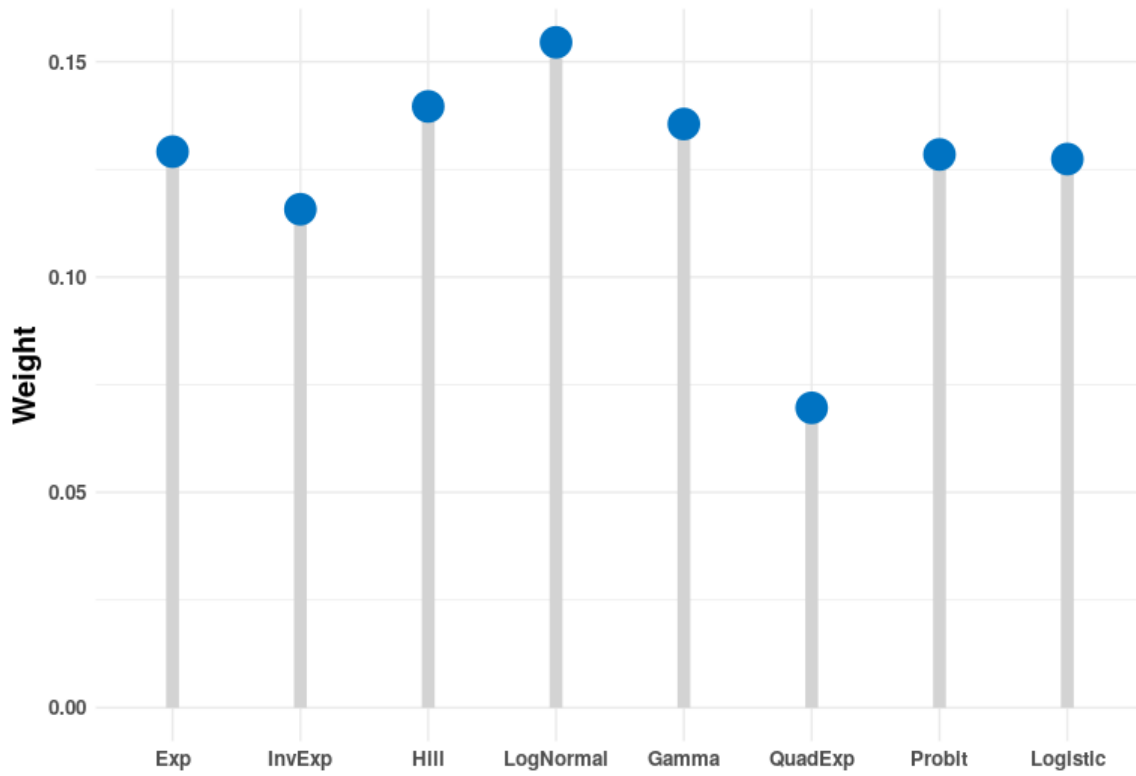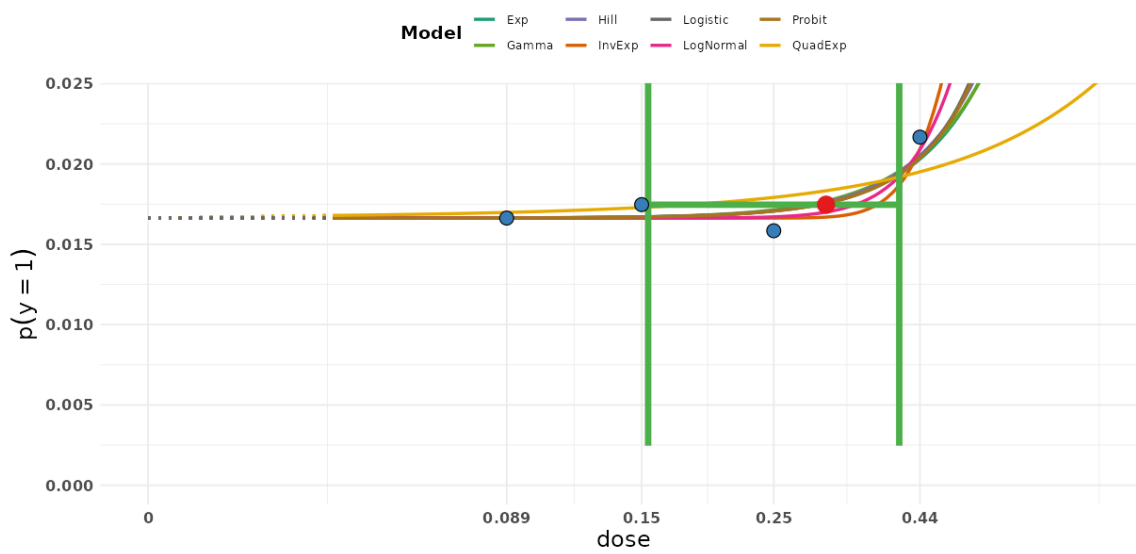

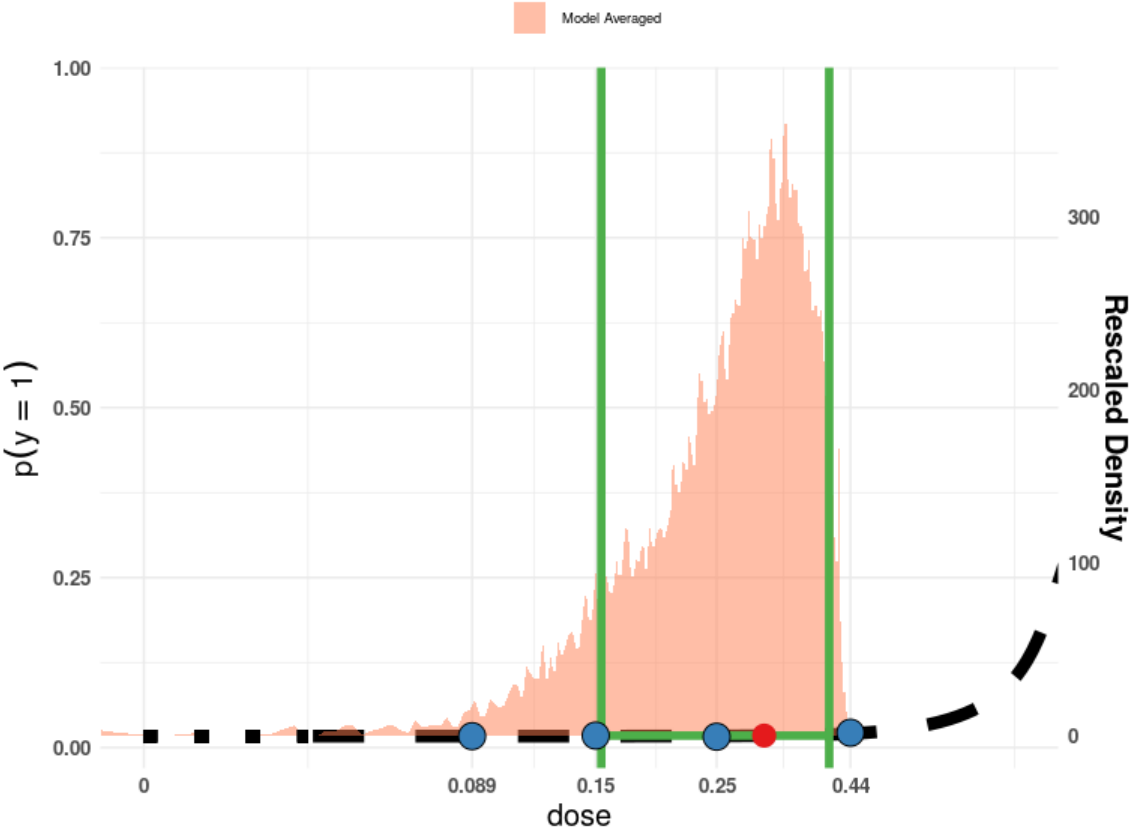

## Parvez et al. (2013) FEV1 (lung function), BMR 5%

### Data Description

The endpoint to be analyzed is: FEV1 response

Data used for analysis:

| Dose | Response | SD  | N   |
|------|----------|-----|-----|
| 1.78 | 1574     | 522 | 312 |
| 5.31 | 1541     | 522 | 315 |
| 8.15 | 1494     | 525 | 315 |

The 'Value for CES' is set to 0.05.

Extended dose range is not applied.

The 'Sampling Method' is set to Bridge Sampling.

### Results

*Information pertaining to this endpoint.*

The results do not fulfill the EFSA BMD guidance (EFSA Scientific Committee, 2022) recommendations since none of the candidate models fit the data sufficiently well.

### Check for constant variance coefficient of variation

Distributional assumption of constant variance is met, Bartlett test p-value is 0.9932

Distributional assumption of constant variance (on log-scale) is met, Bartlett test p-value is 0.6173

### Goodness of Fit

None of the models provide an adequate fit do the data (Bayes factor is 3.24e+01).

### Model Averaged BMD

| Model          | Type | BMDL  | BMD   | BMDU  |
|----------------|------|-------|-------|-------|
| Model Averaged | BS   | 2.204 | 6.465 | 8.015 |

### Estimated BMDs per model

| Model | BMDL  | BMD   | BMDU  | Model Weights | Converged |
|-------|-------|-------|-------|---------------|-----------|
| E4_N  | 2.067 | 6.606 | 8.010 | 0.000         | 1         |
| IE4_N | 0.417 | 6.644 | 8.055 | 0.000         | 0         |
| H4_N  | 1.194 | 6.494 | 8.029 | 0.000         | 0         |
| LN4_N | 0.873 | 6.912 | 8.077 | 0.000         | 0         |
| G4_N  | 2.801 | 6.787 | 8.025 | 0.000         | 1         |
| QE4_N | 4.114 | 6.493 | 7.996 | 0.000         | 1         |
| P4_N  | 2.339 | 6.590 | 8.024 | 0.000         | 1         |

|        |       |       |       |       |   |
|--------|-------|-------|-------|-------|---|
| L4_N   | 1.741 | 6.414 | 7.996 | 0.000 | 0 |
| E4_LN  | 1.169 | 6.393 | 8.036 | 0.128 | 0 |
| IE4_LN | 2.543 | 6.997 | 8.075 | 0.051 | 1 |
| H4_LN  | 1.237 | 6.197 | 7.979 | 0.125 | 0 |
| LN4_LN | 1.599 | 6.888 | 8.053 | 0.071 | 0 |
| G4_LN  | 2.395 | 6.568 | 8.037 | 0.154 | 1 |
| QE4_LN | 3.891 | 6.196 | 7.964 | 0.226 | 1 |
| P4_LN  | 2.087 | 6.447 | 7.999 | 0.113 | 1 |
| L4_LN  | 1.821 | 6.645 | 8.021 | 0.131 | 1 |

**Plots of Fitted Models**

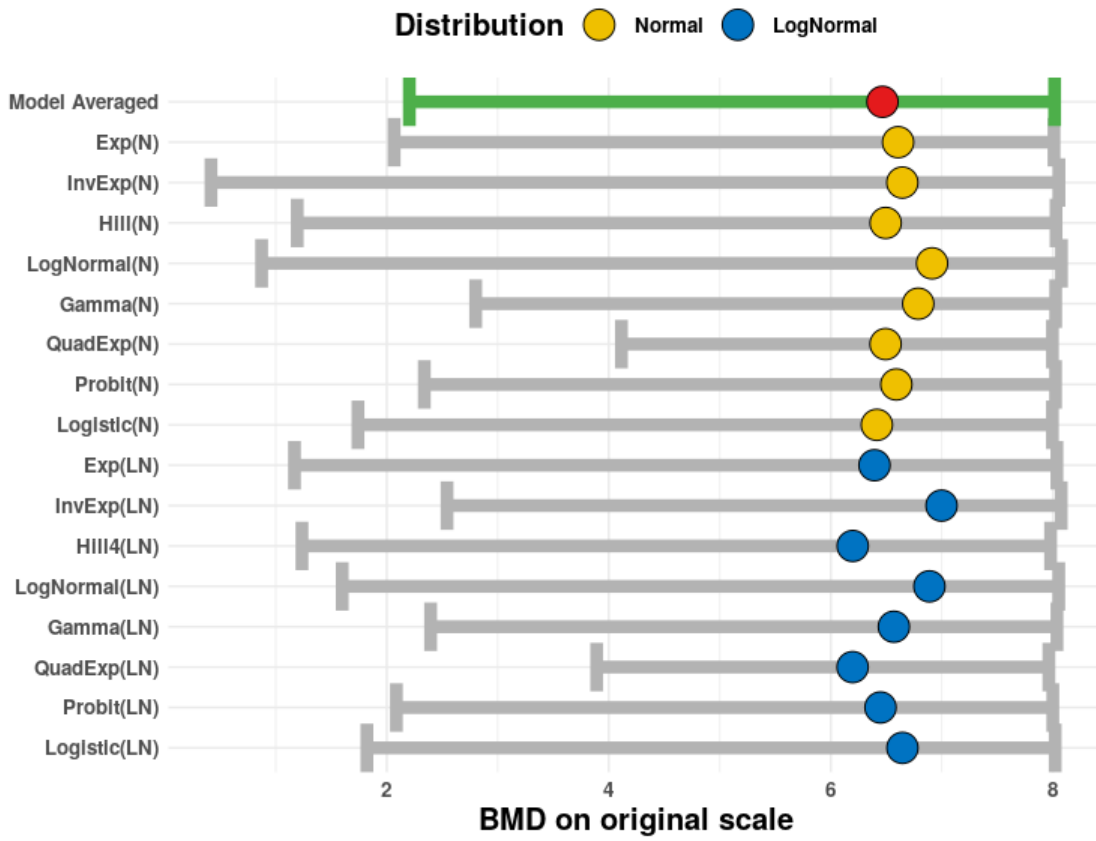

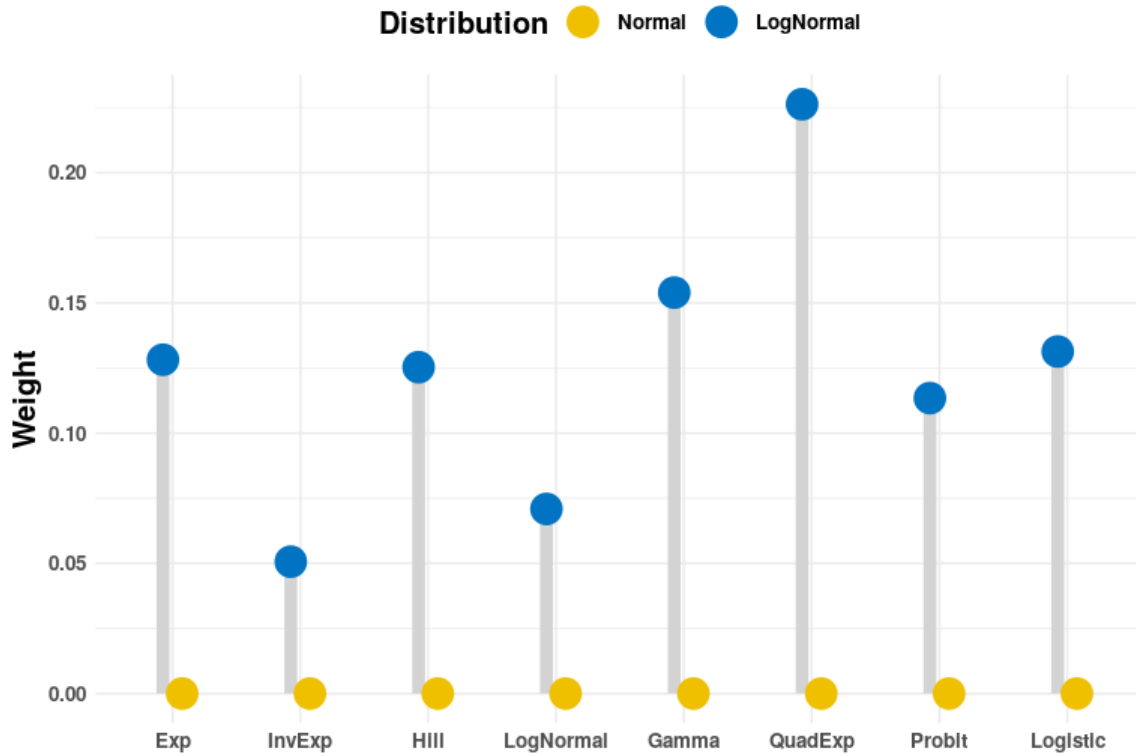

**Normal distribution**

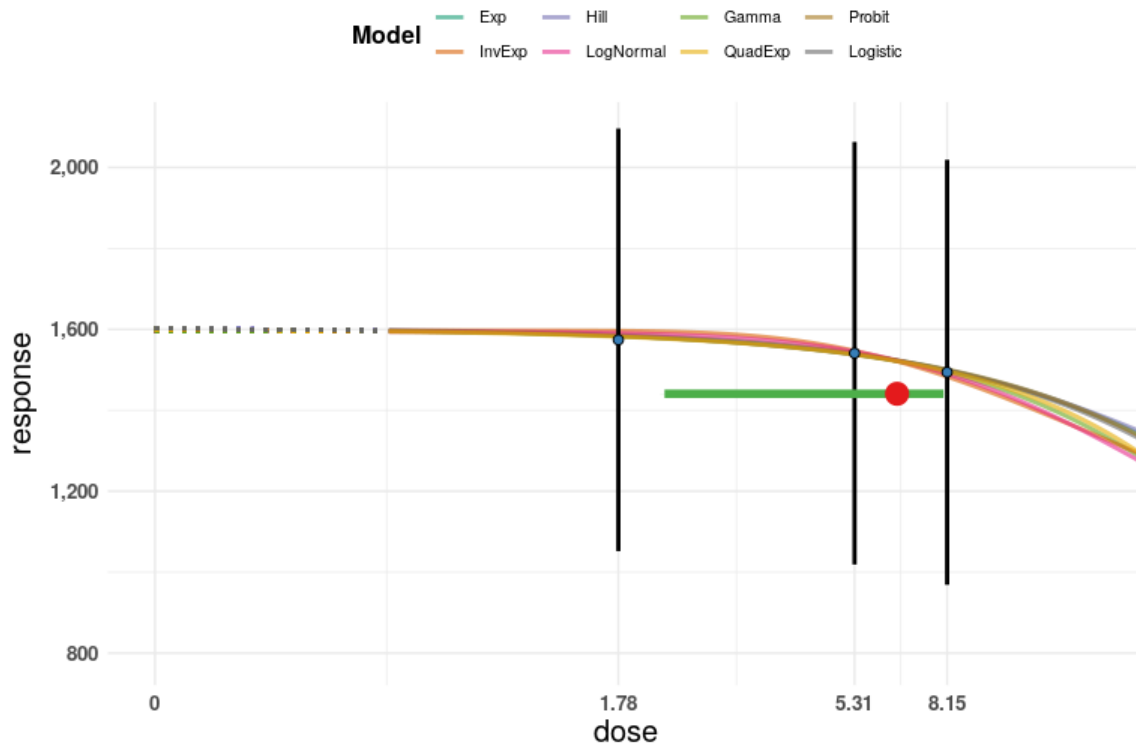

### LogNormal distribution

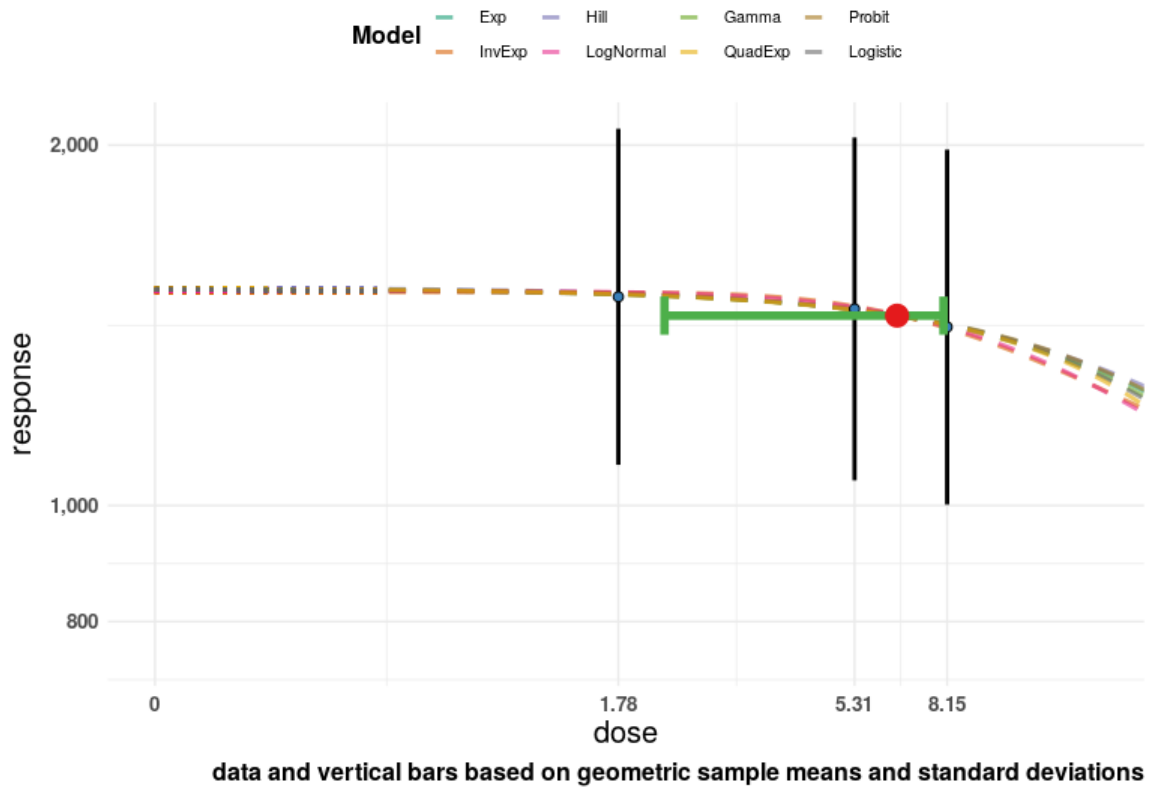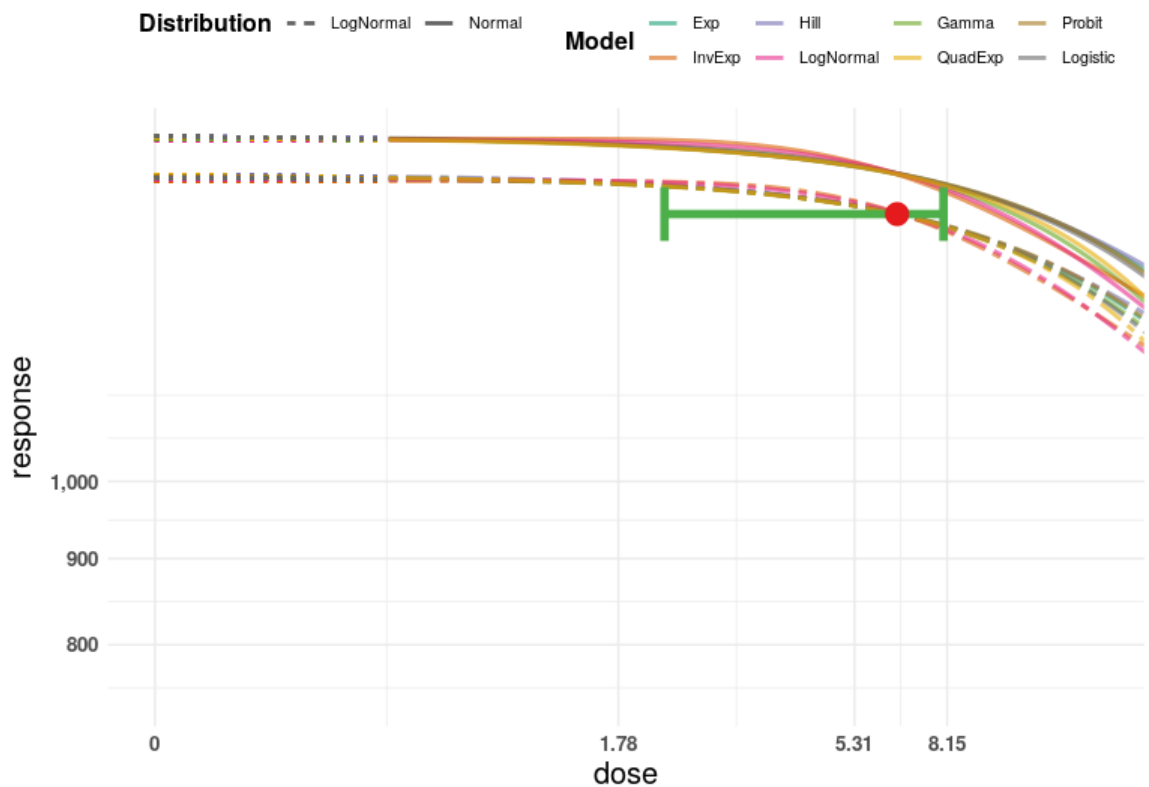



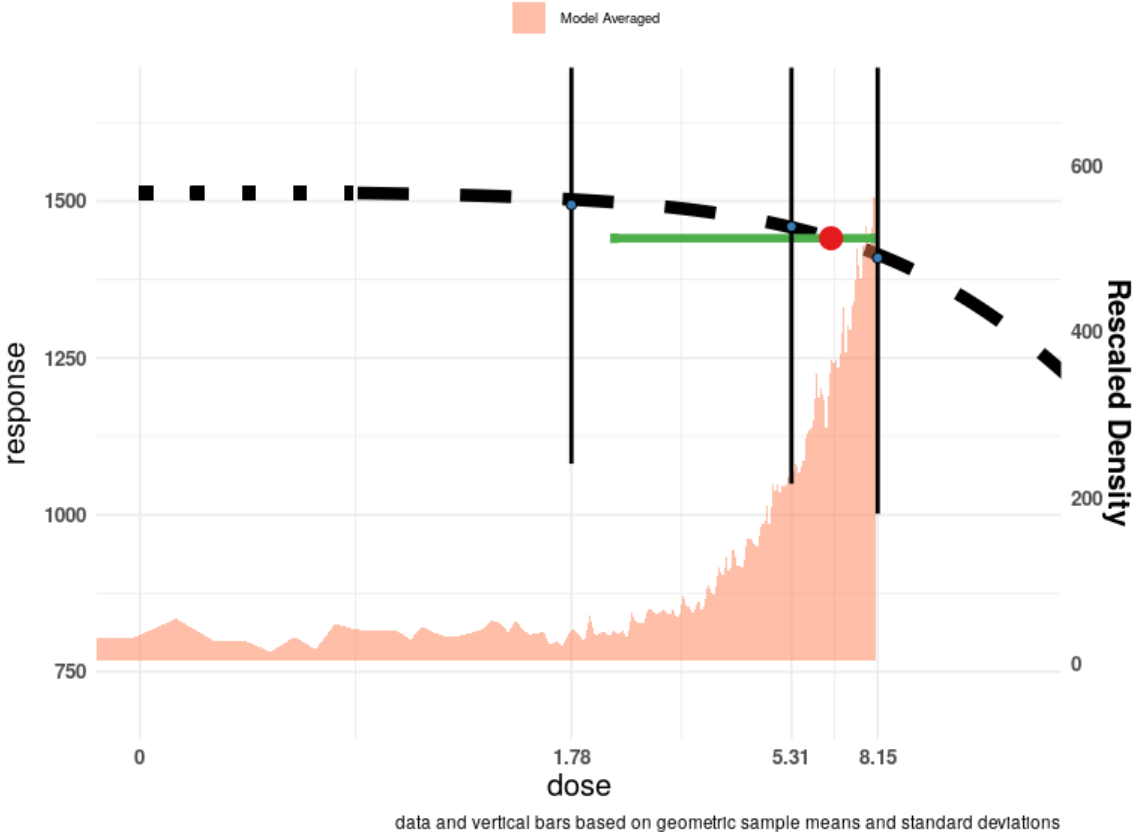

## Parvez et al. (2013) FVC (lung function), BMR 5%

### Data Description

The endpoint to be analyzed is: FVC response

Data used for analysis:

| Dose | Response | SD  | N   |
|------|----------|-----|-----|
| 1.78 | 2268     | 538 | 312 |
| 5.31 | 2254     | 539 | 315 |
| 8.15 | 2170     | 541 | 315 |

The 'Value for CES' is set to 0.05.

Extended dose range is not applied.

The 'Sampling Method' is set to Bridge Sampling.

### Results

*Information pertaining to this endpoint.*

The results do not fulfill the EFSA BMD guidance (EFSA Scientific Committee, 2022) recommendations since none of the candidate models fit the data sufficiently well.

### Check for constant variance coefficient of variation

Distributional assumption of constant variance is met, Bartlett test p-value is 0.995

Distributional assumption of constant variance (on log-scale) is met, Bartlett test p-value is 0.6541

### Goodness of Fit

None of the models provide an adequate fit do the data (Bayes factor is 5.67e+01).

### Model Averaged BMD

| Model          | Type | BMDL  | BMD   | BMDU  |
|----------------|------|-------|-------|-------|
| Model Averaged | BS   | 3.459 | 7.192 | 8.091 |

### Estimated BMDs per model

| Model | BMDL  | BMD   | BMDU  | Model Weights | Converged |
|-------|-------|-------|-------|---------------|-----------|
| E4_N  | 3.277 | 7.311 | 8.107 | 0.000         | 0         |
| IE4_N | 5.348 | 7.723 | 8.124 | 0.000         | 0         |
| H4_N  | 2.384 | 7.471 | 8.121 | 0.000         | 0         |
| LN4_N | 3.220 | 7.426 | 8.099 | 0.000         | 0         |
| G4_N  | 2.865 | 7.166 | 8.072 | 0.000         | 0         |
| QE4_N | 4.866 | 6.890 | 8.037 | 0.000         | 1         |
| P4_N  | 3.106 | 7.341 | 8.089 | 0.000         | 1         |
| L4_N  | 2.933 | 7.368 | 8.089 | 0.000         | 0         |

|        |       |       |       |       |   |
|--------|-------|-------|-------|-------|---|
| E4_LN  | 2.954 | 7.264 | 8.086 | 0.127 | 0 |
| IE4_LN | 4.948 | 7.612 | 8.111 | 0.054 | 0 |
| H4_LN  | 2.651 | 7.434 | 8.119 | 0.154 | 0 |
| LN4_LN | 3.806 | 7.486 | 8.102 | 0.076 | 0 |
| G4_LN  | 3.870 | 7.295 | 8.077 | 0.142 | 1 |
| QE4_LN | 4.751 | 6.734 | 8.019 | 0.200 | 1 |
| P4_LN  | 2.905 | 7.022 | 8.057 | 0.118 | 1 |
| L4_LN  | 2.741 | 7.173 | 8.100 | 0.128 | 0 |

**Plots of Fitted Models**

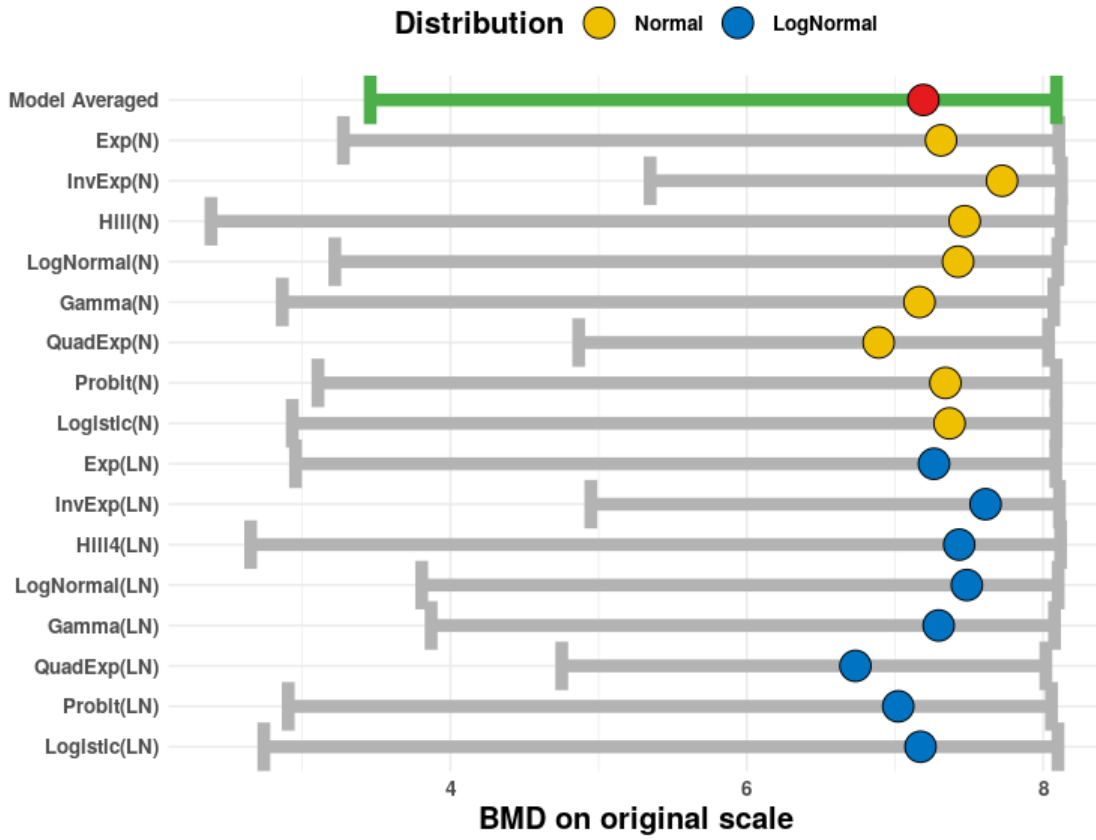

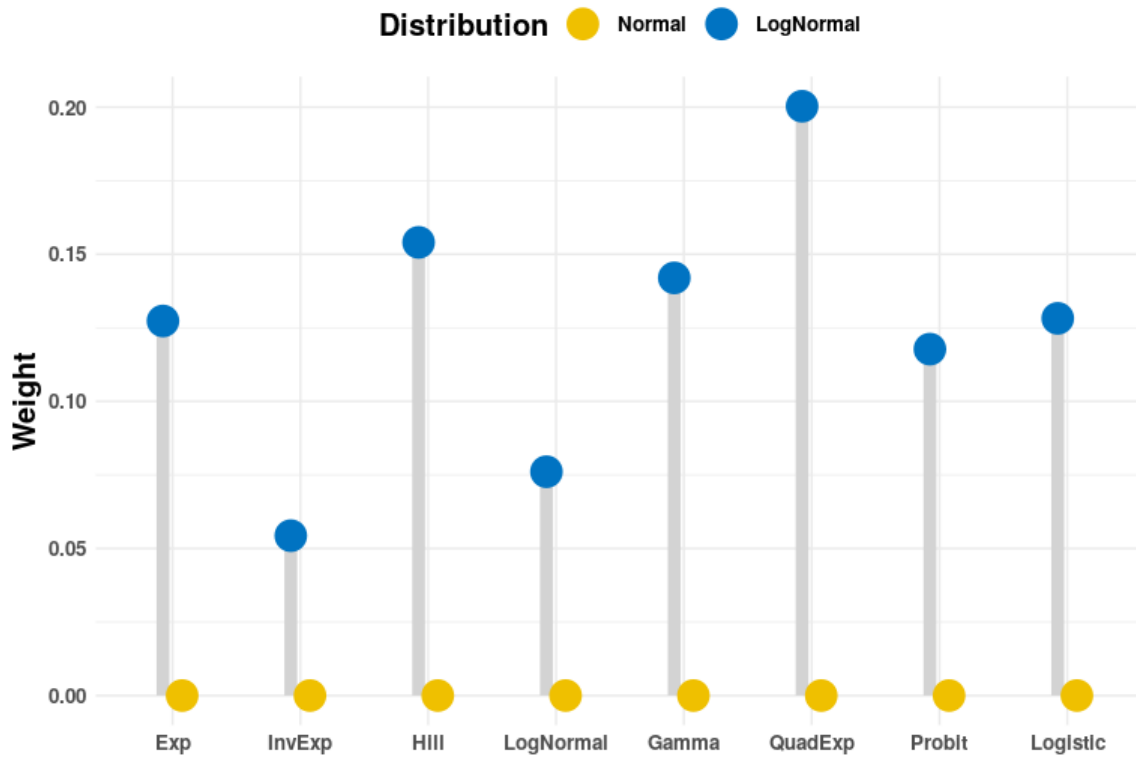

**Normal distribution**

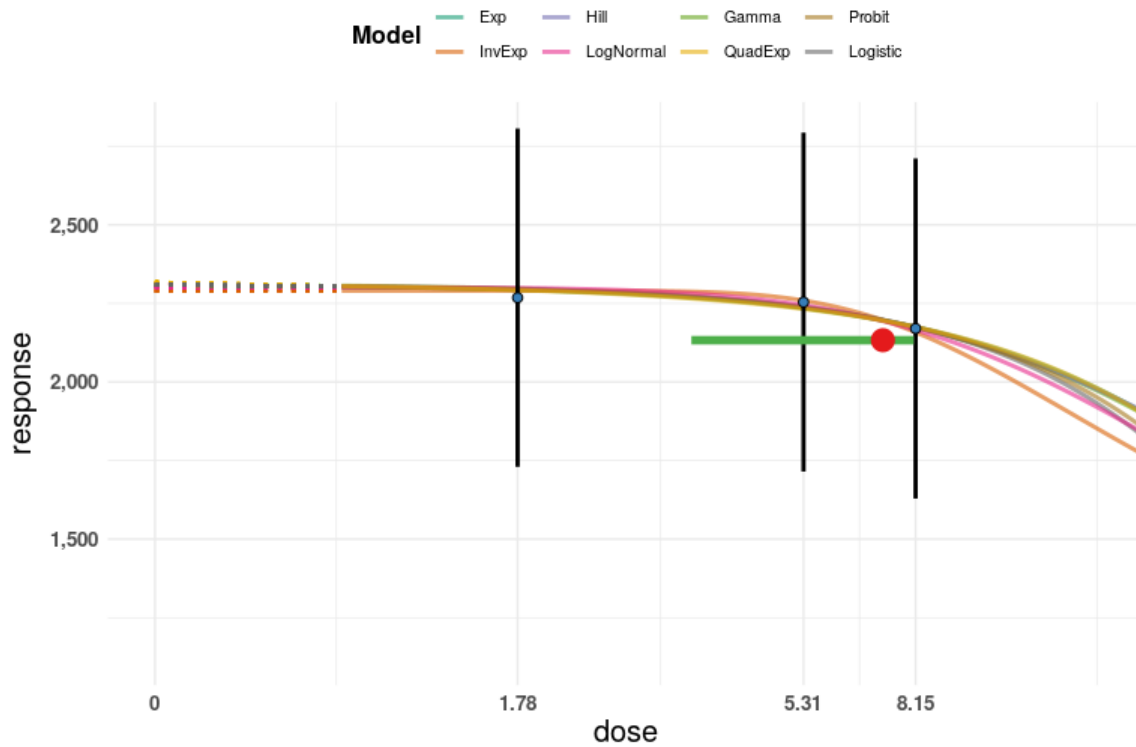

### LogNormal distribution

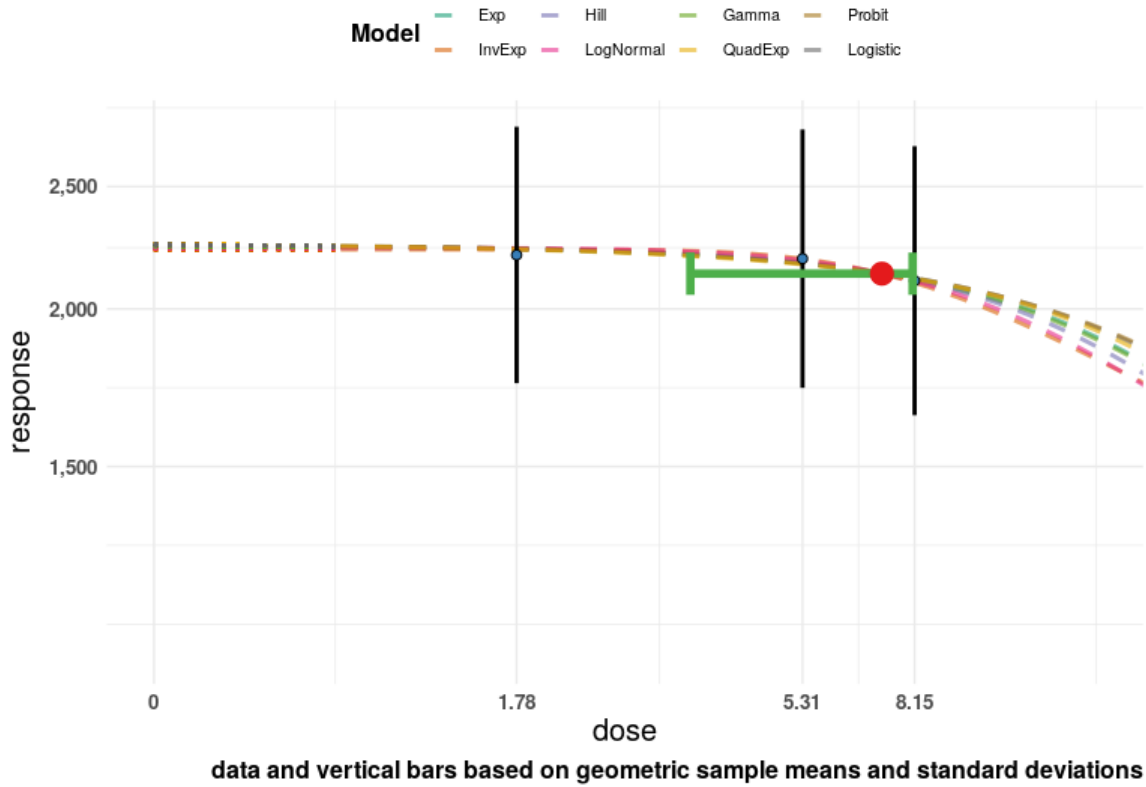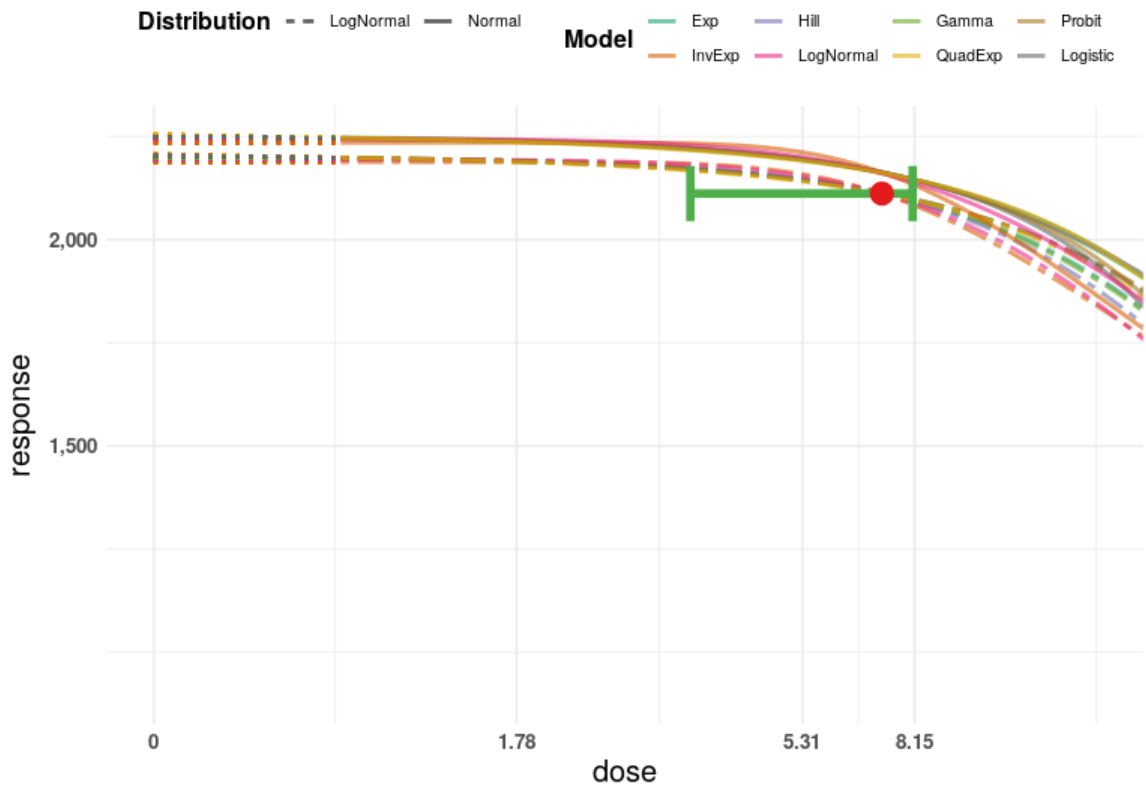

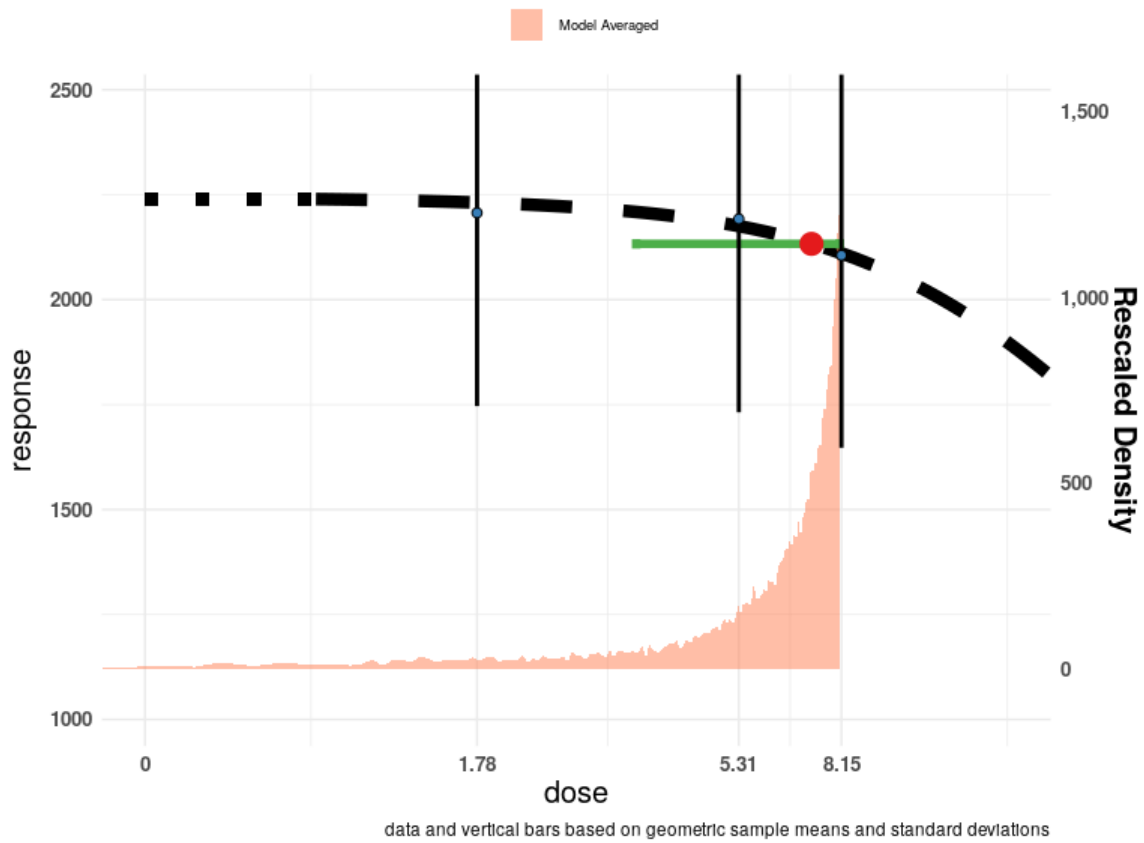

## Pierce et al. (2011) skin lesions, relative BMR 5%

### Data Description

The endpoint to be analyzed is: Adj.cases for skin lesions

Data used for analysis:

| Exposure.µg.kg.bw.per.day | Adj.cases | N    |
|---------------------------|-----------|------|
| 1.46                      | 117       | 2358 |
| 3.28                      | 123       | 2118 |
| 6.55                      | 145       | 1726 |
| 12.00                     | 314       | 2855 |
| 15.64                     | 115       | 617  |

The 'Value for CES' is set to 0.00261044.

Extended dose range is not applied.

Informative background prior: min: 0.04912214; the most likely; 0.04961832; max: 0.05011450. Shape parameter is applied.

The 'Sampling Method' is set to Bridge Sampling.

### Results

*Information pertaining to this endpoint.*

### Goodness of Fit

Best fitting model fits sufficiently well (Bayes factor is 6.63e-03).

### Model Averaged BMD

| Model          | Type | BMDL | BMD   | BMDU  |
|----------------|------|------|-------|-------|
| Model Averaged | BS   | 0.8  | 1.606 | 2.862 |

### Estimated BMDs per model

| Model | BMDL  | BMD   | BMDU  | Model Weights | Converged |
|-------|-------|-------|-------|---------------|-----------|
| E4_Q  | 1.128 | 1.883 | 2.984 | 0.121         | 1         |
| IE4_Q | 1.655 | 2.535 | 3.693 | 0.015         | 1         |
| H4_Q  | 1.093 | 1.871 | 2.967 | 0.110         | 1         |
| LN4_Q | 1.418 | 2.310 | 3.485 | 0.040         | 1         |
| G4_Q  | 1.120 | 1.959 | 3.106 | 0.133         | 1         |
| QE4_Q | 0.671 | 1.073 | 1.674 | 0.235         | 1         |
| P4_Q  | 0.892 | 1.618 | 2.629 | 0.167         | 1         |
| L4_Q  | 0.872 | 1.577 | 2.544 | 0.178         | 1         |



**Plots of Fitted Models**

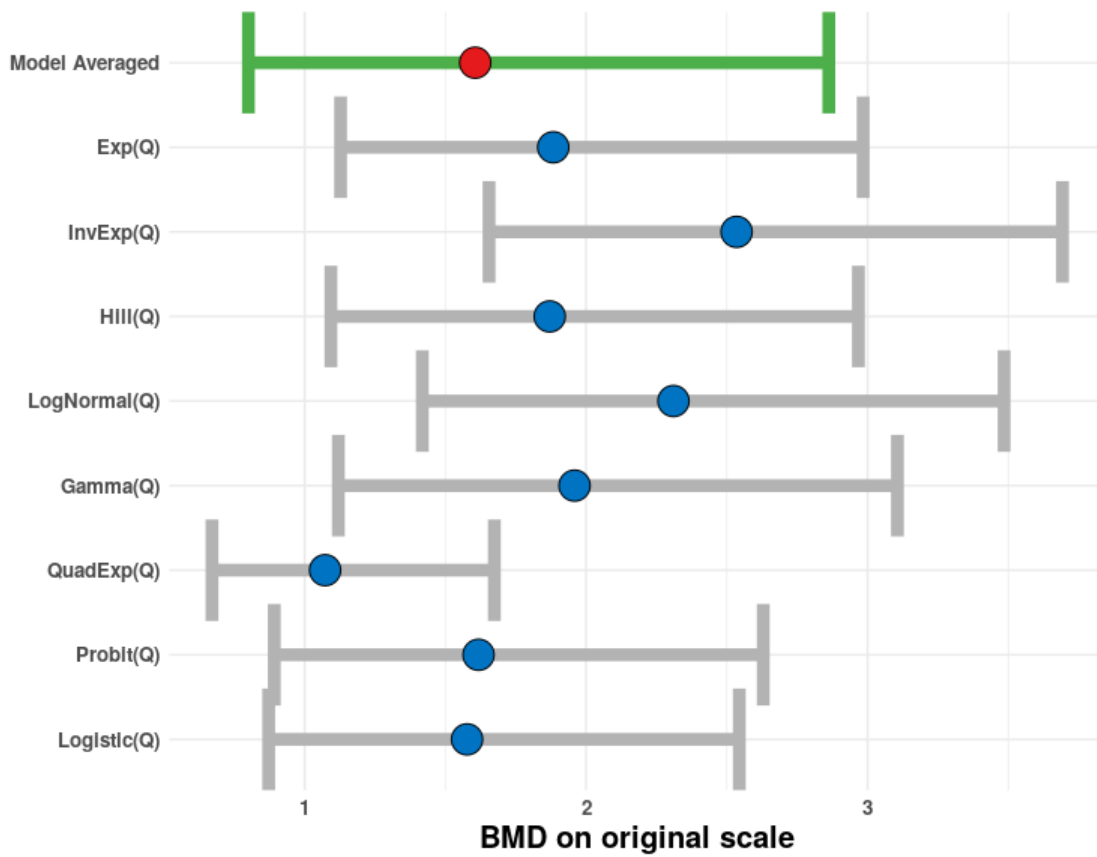

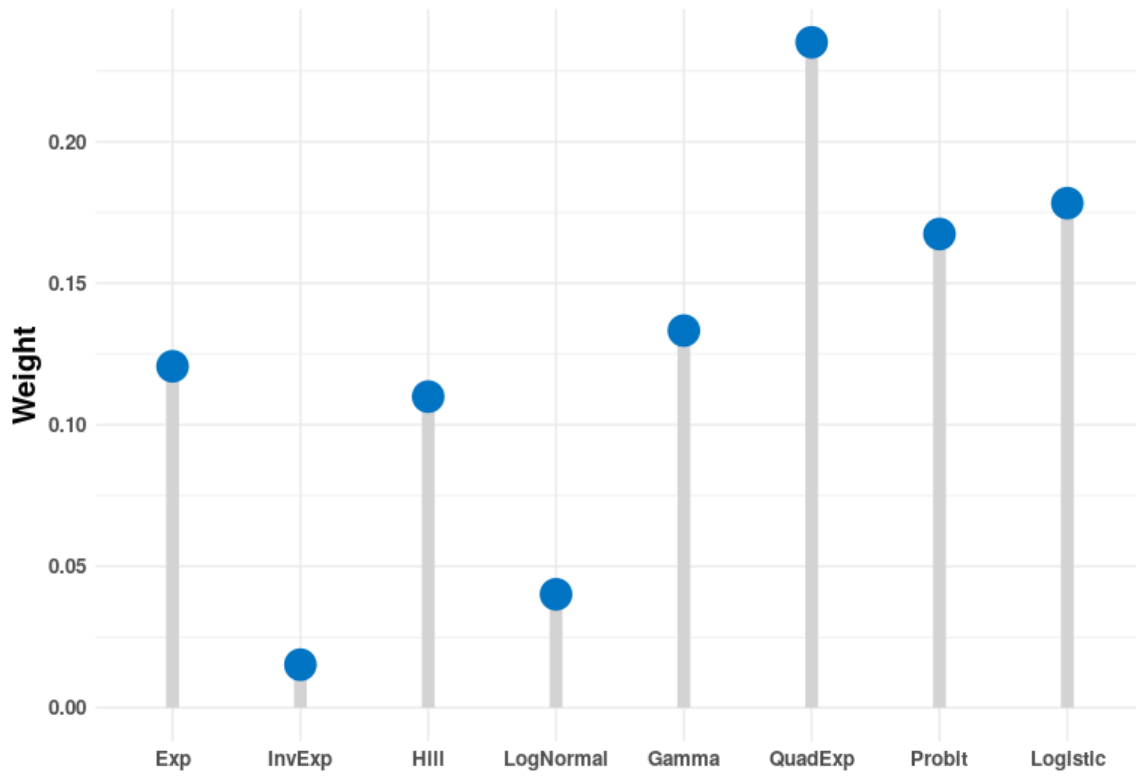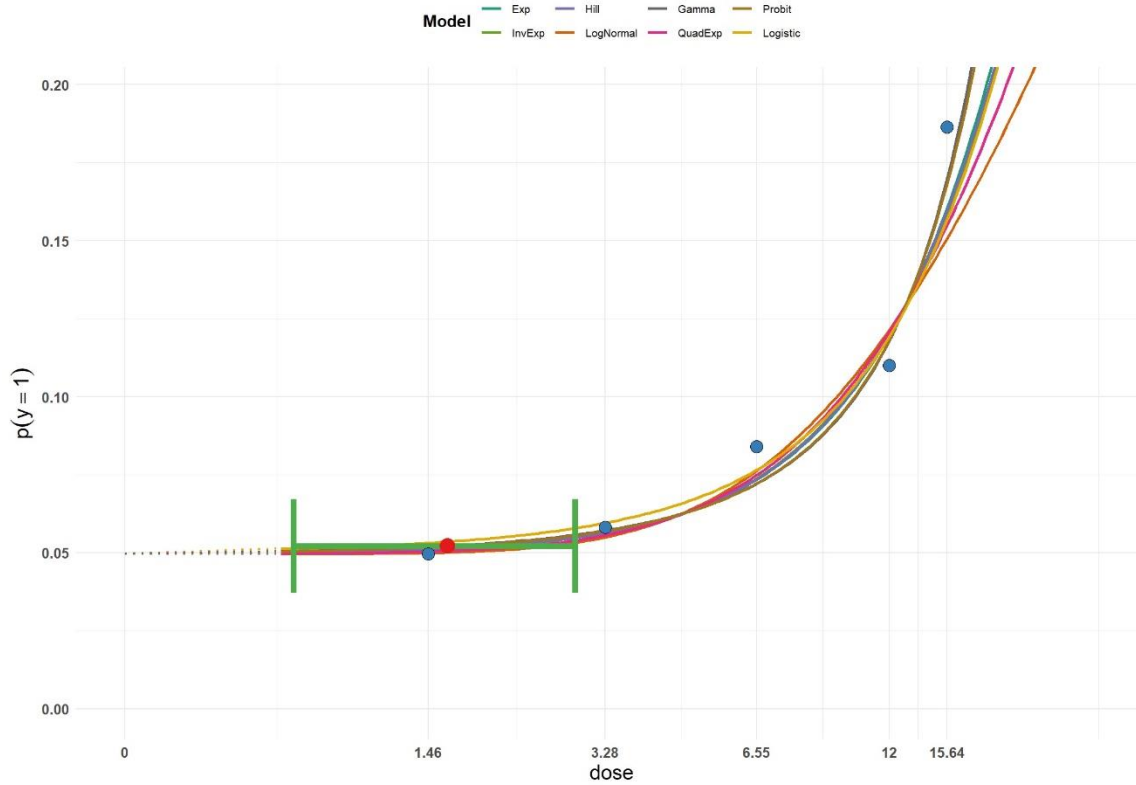

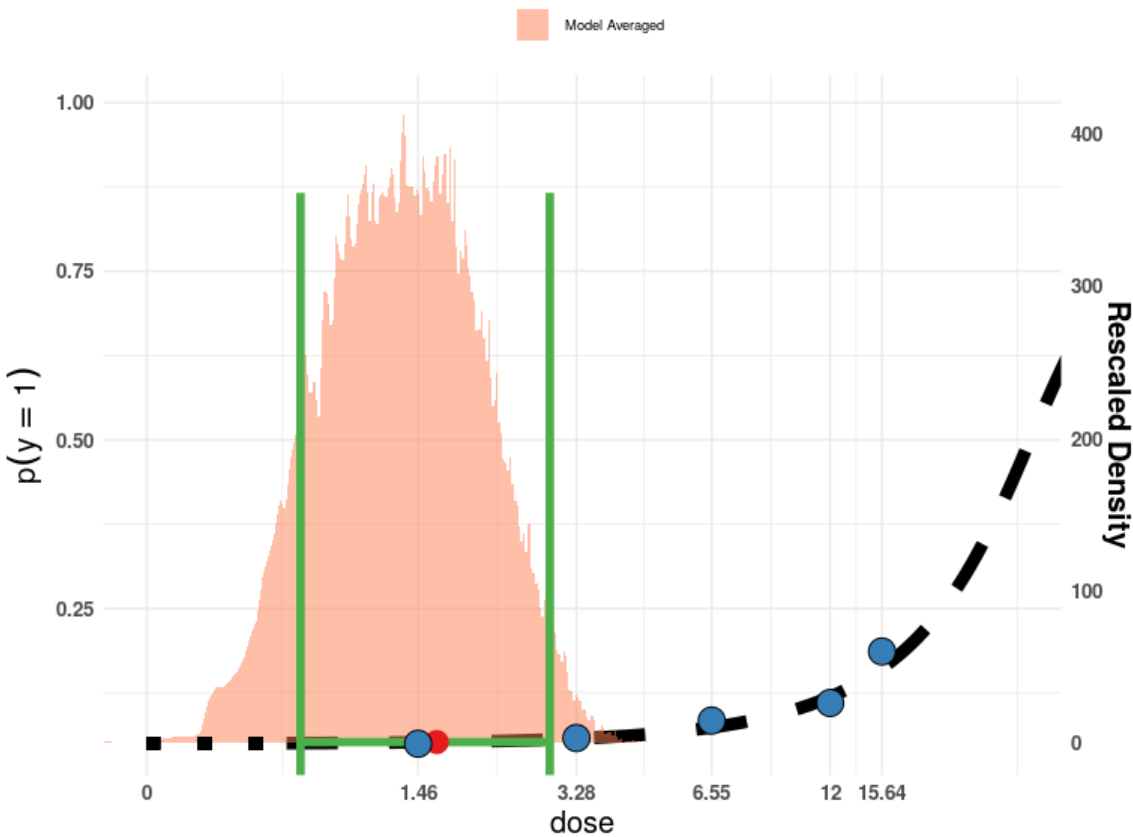

## Powers et al. (2019) airflow obstruction, relative BMR 5%

### Data Description

The endpoint to be analyzed is: Adj.cases for airflow obstruction

Data used for analysis:

| Exposure.µg.kg.bw.per.day | Adj.cases | N   |
|---------------------------|-----------|-----|
| 0.073                     | 174       | 757 |
| 0.220                     | 160       | 636 |
| 0.280                     | 124       | 432 |

The 'Value for CES' is set to 0.01492281.

Extended dose range is not applied.

Informative background prior: min: 0.22755614; the most likely; 0.22985469; max: 0.23215324. Shape parameter is applied.

The 'Sampling Method' is set to Bridge Sampling.

### Results

*Information pertaining to this endpoint.*

### Goodness of Fit

Best fitting model fits sufficiently well (Bayes factor is 2.15e+00).

### Model Averaged BMD

| Model          | Type | BMDL  | BMD   | BMDU  |
|----------------|------|-------|-------|-------|
| Model Averaged | BS   | 0.073 | 0.172 | 0.255 |

### Estimated BMDs per model

| Model | BMDL  | BMD   | BMDU  | Model Weights | Converged |
|-------|-------|-------|-------|---------------|-----------|
| E4_Q  | 0.070 | 0.169 | 0.251 | 0.128         | 1         |
| IE4_Q | 0.118 | 0.208 | 0.262 | 0.080         | 1         |
| H4_Q  | 0.069 | 0.171 | 0.256 | 0.128         | 1         |
| LN4_Q | 0.110 | 0.200 | 0.261 | 0.101         | 1         |
| G4_Q  | 0.075 | 0.171 | 0.247 | 0.144         | 1         |
| QE4_Q | 0.070 | 0.127 | 0.246 | 0.170         | 1         |
| P4_Q  | 0.072 | 0.175 | 0.252 | 0.124         | 1         |
| L4_Q  | 0.069 | 0.175 | 0.252 | 0.126         | 1         |

**Plots of Fitted Models**

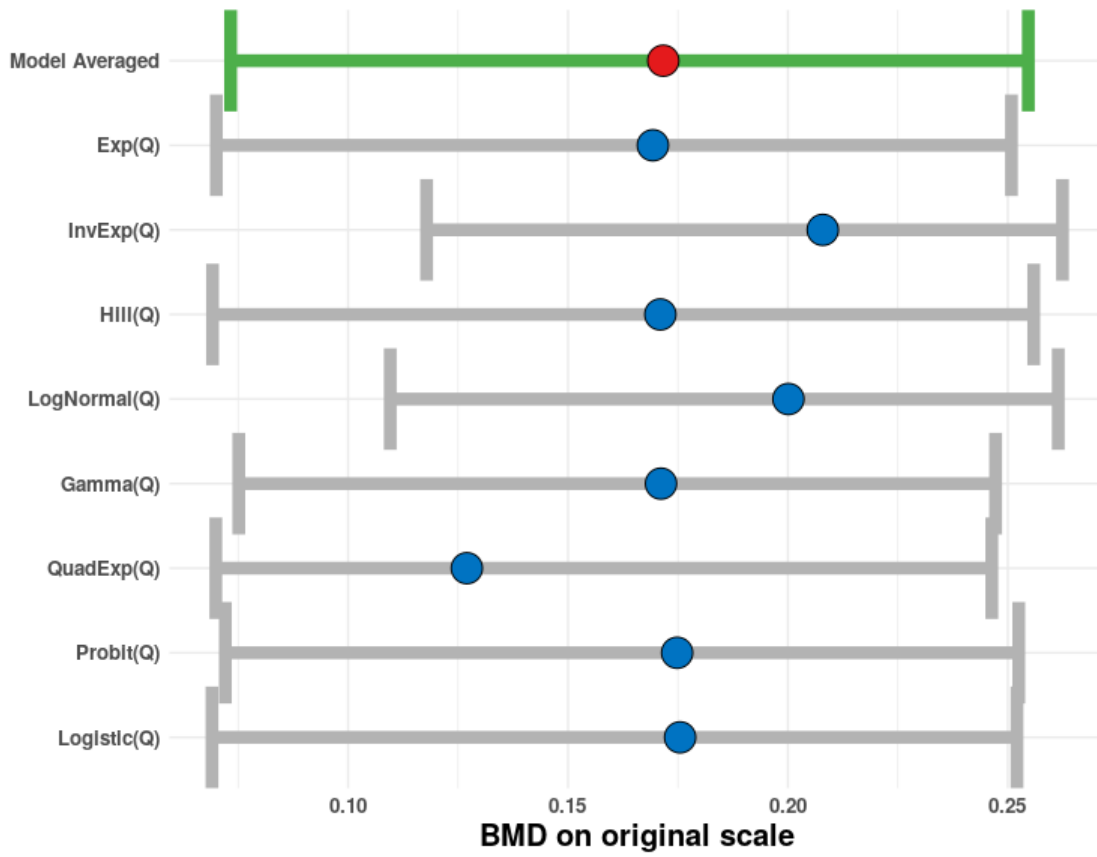

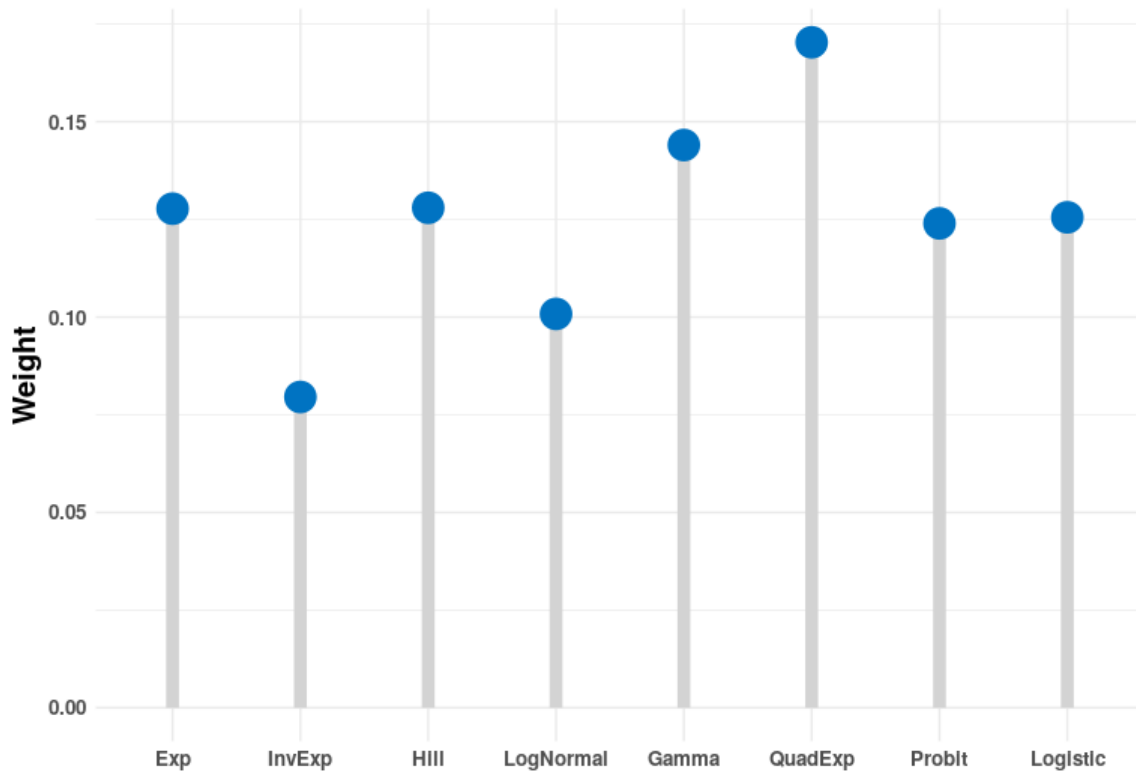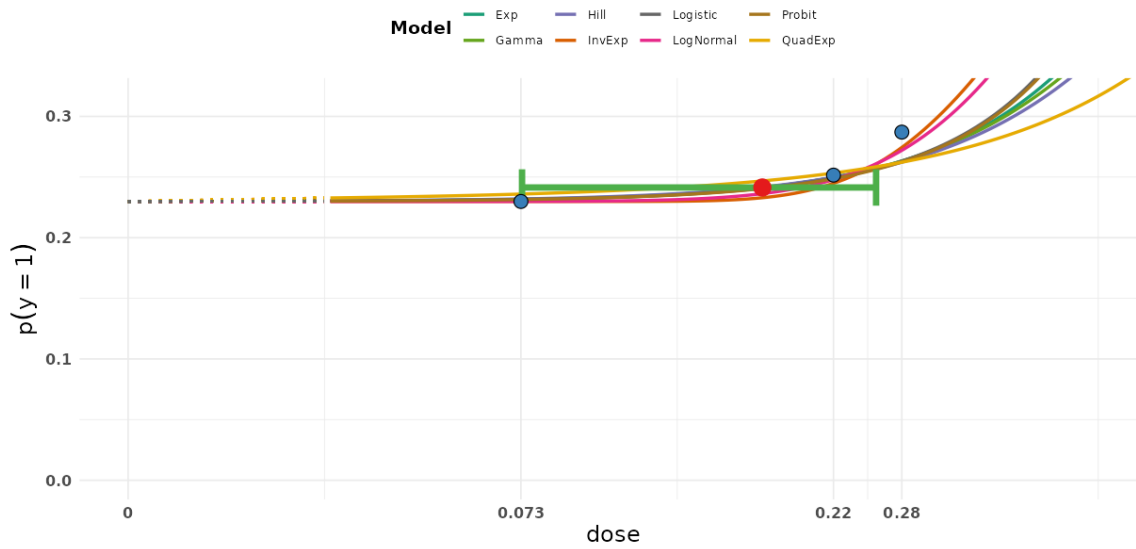

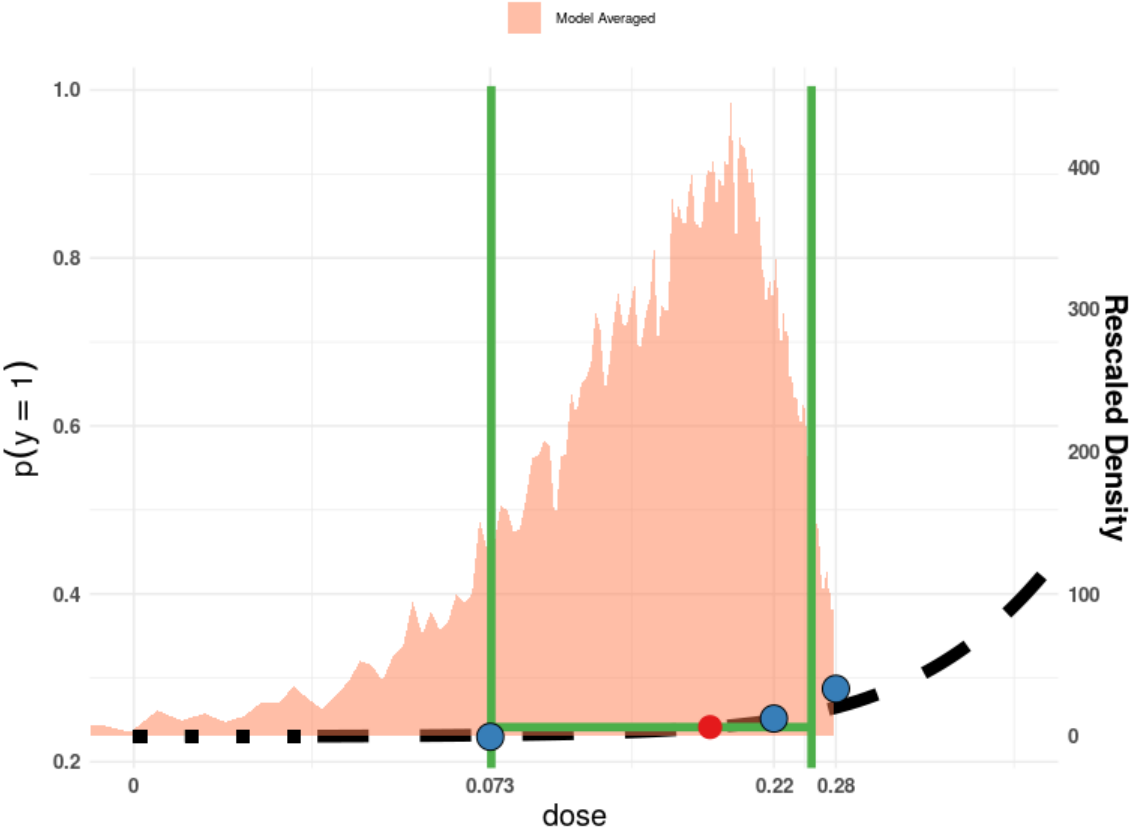

## Powers et al. (2019) emphysema, relative BMR 5%

### Data Description

The endpoint to be analyzed is: Adj.cases for emphysema

Data used for analysis:

| Exposure.µg.kg.bw.per.day | Adj.cases | N   |
|---------------------------|-----------|-----|
| 0.073                     | 26        | 880 |
| 0.220                     | 25        | 718 |
| 0.280                     | 27        | 518 |

The 'Value for CES' is set to 0.00152225.

Extended dose range is not applied.

Informative background prior: min: 0.02925000; the most likely: 0.02954545; max: 0.02984091. Shape parameter is applied.

The 'Sampling Method' is set to Bridge Sampling.

### Results

*Information pertaining to this endpoint.*

### Goodness of Fit

Best fitting model fits sufficiently well (Bayes factor is 2.44e+00).

### Model Averaged BMD

| Model          | Type | BMDL  | BMD   | BMDU  |
|----------------|------|-------|-------|-------|
| Model Averaged | BS   | 0.038 | 0.149 | 0.248 |

### Estimated BMDs per model

| Model | BMDL  | BMD   | BMDU  | Model Weights | Converged |
|-------|-------|-------|-------|---------------|-----------|
| E4_Q  | 0.038 | 0.144 | 0.239 | 0.133         | 1         |
| IE4_Q | 0.110 | 0.206 | 0.260 | 0.093         | 1         |
| H4_Q  | 0.040 | 0.146 | 0.248 | 0.134         | 1         |
| LN4_Q | 0.082 | 0.183 | 0.251 | 0.117         | 1         |
| G4_Q  | 0.043 | 0.139 | 0.229 | 0.139         | 1         |
| QE4_Q | 0.029 | 0.074 | 0.228 | 0.133         | 1         |
| P4_Q  | 0.040 | 0.151 | 0.247 | 0.123         | 1         |
| L4_Q  | 0.043 | 0.149 | 0.246 | 0.128         | 1         |



**Plots of Fitted Models**

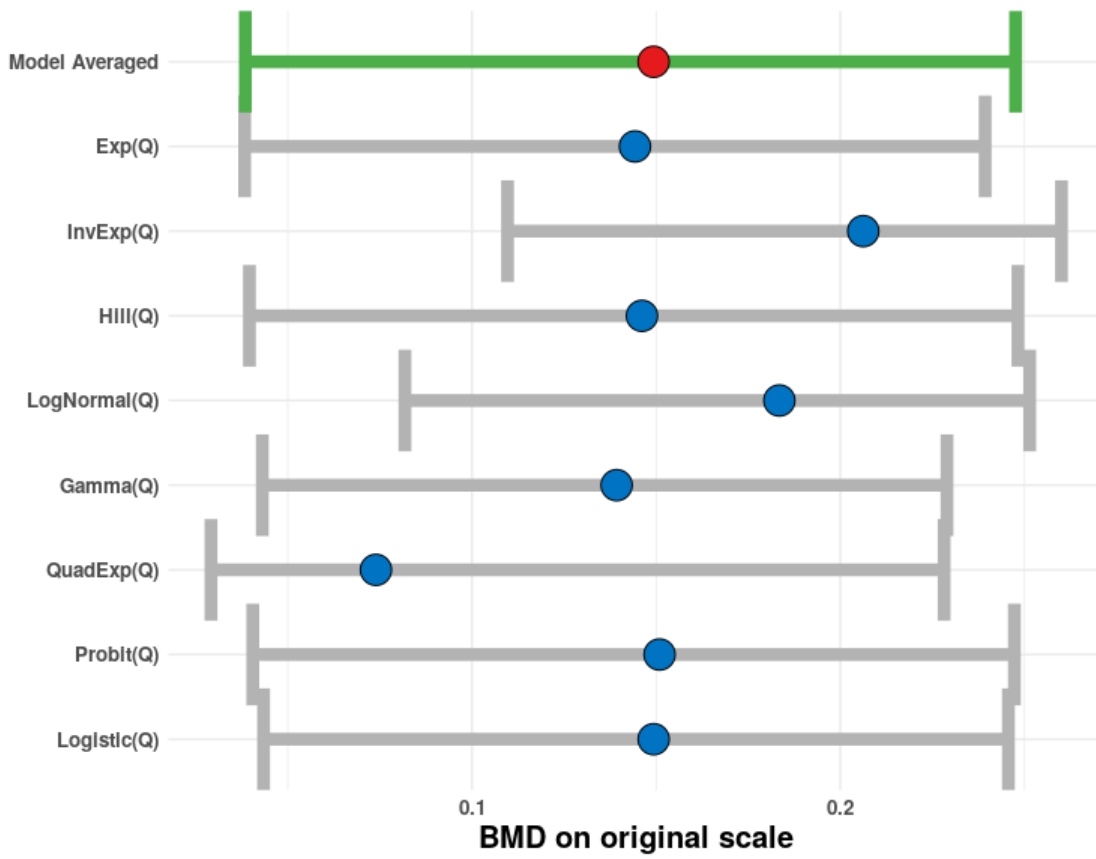

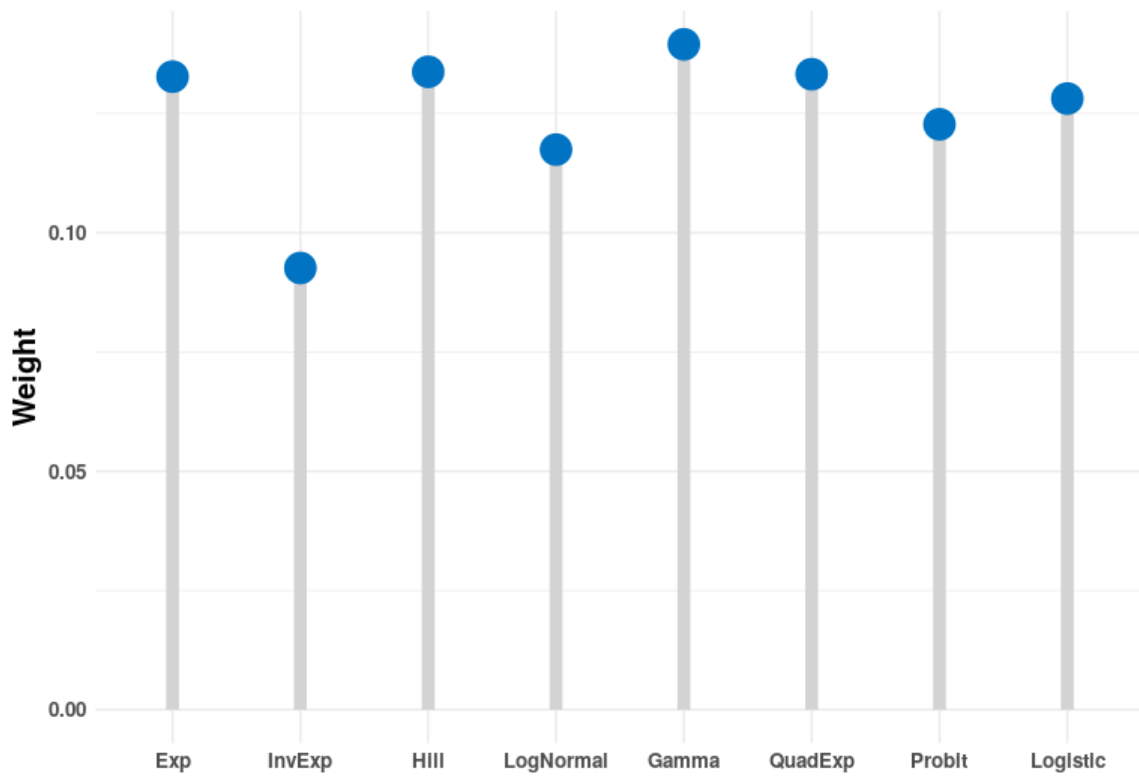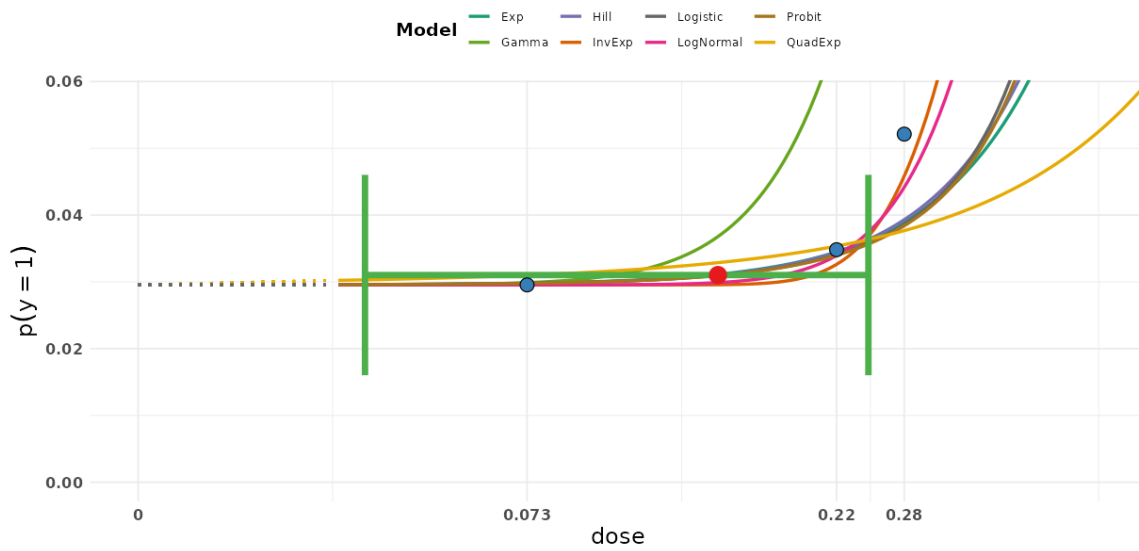

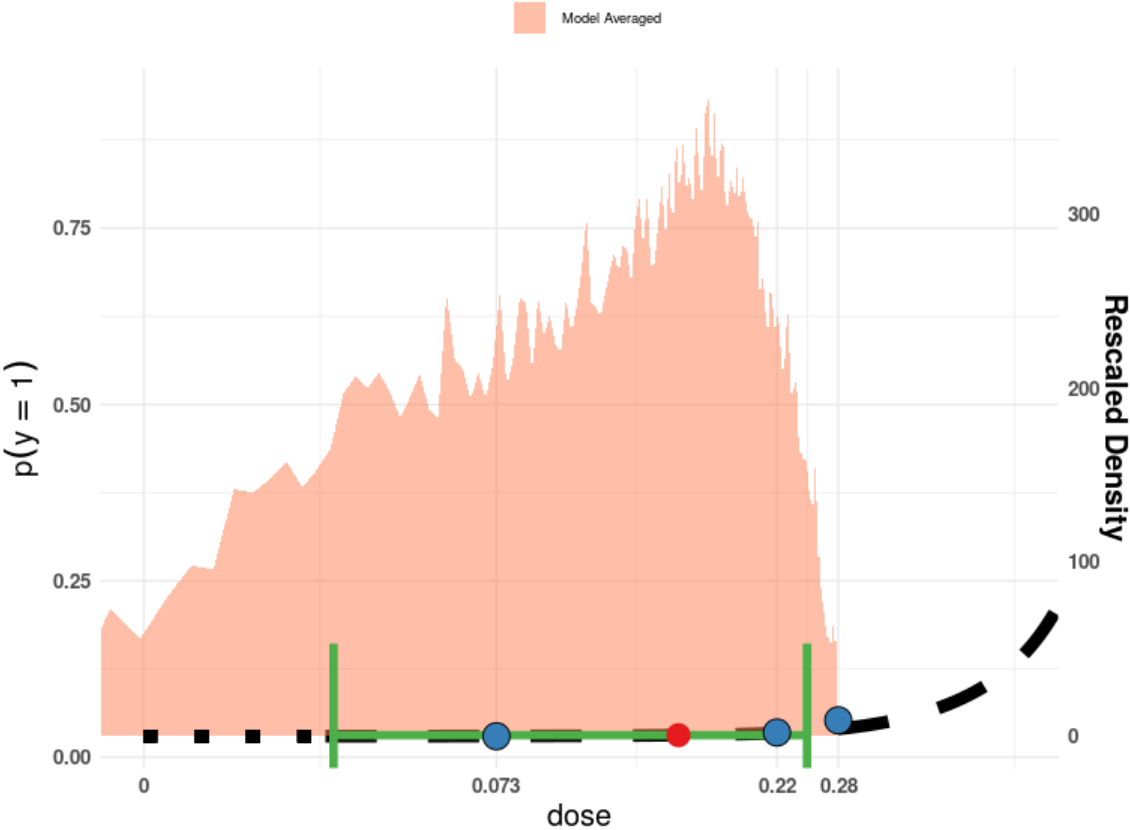

## Powers et al. (2019) restrictive pattern, relative BMR 5%

### Data Description

The endpoint to be analyzed is: Adj.cases for restrictive pattern

Data used for analysis:

| Exposure.µg.kg.bw.per.day | Adj.cases | N   |
|---------------------------|-----------|-----|
| 0.073                     | 133       | 725 |
| 0.220                     | 92        | 558 |
| 0.280                     | 81        | 391 |

The 'Value for CES' is set to 0.01123311.

Extended dose range is not applied.

Informative background prior: min: 0.14675862; the most likely; 0.18344828; max: 0.22013793. Shape parameter is applied.

The 'Sampling Method' is set to Bridge Sampling.

### Results

*Information pertaining to this endpoint.*

### Goodness of Fit

Best fitting model fits sufficiently well (Bayes factor is 3.63e+00).

### Model Averaged BMD

| Model          | Type | BMDL  | BMD   | BMDU  |
|----------------|------|-------|-------|-------|
| Model Averaged | BS   | 0.097 | 0.226 | 0.275 |

### Estimated BMDs per model

| Model | BMDL  | BMD   | BMDU  | Model Weights | Converged |
|-------|-------|-------|-------|---------------|-----------|
| E4_Q  | 0.092 | 0.225 | 0.275 | 0.131         | 1         |
| IE4_Q | 0.176 | 0.253 | 0.278 | 0.083         | 1         |
| H4_Q  | 0.097 | 0.227 | 0.274 | 0.132         | 1         |
| LN4_Q | 0.162 | 0.245 | 0.277 | 0.095         | 1         |
| G4_Q  | 0.088 | 0.220 | 0.273 | 0.142         | 0         |
| QE4_Q | 0.093 | 0.196 | 0.272 | 0.159         | 1         |
| P4_Q  | 0.088 | 0.221 | 0.275 | 0.129         | 1         |
| L4_Q  | 0.092 | 0.225 | 0.274 | 0.127         | 1         |

**Plots of Fitted Models**

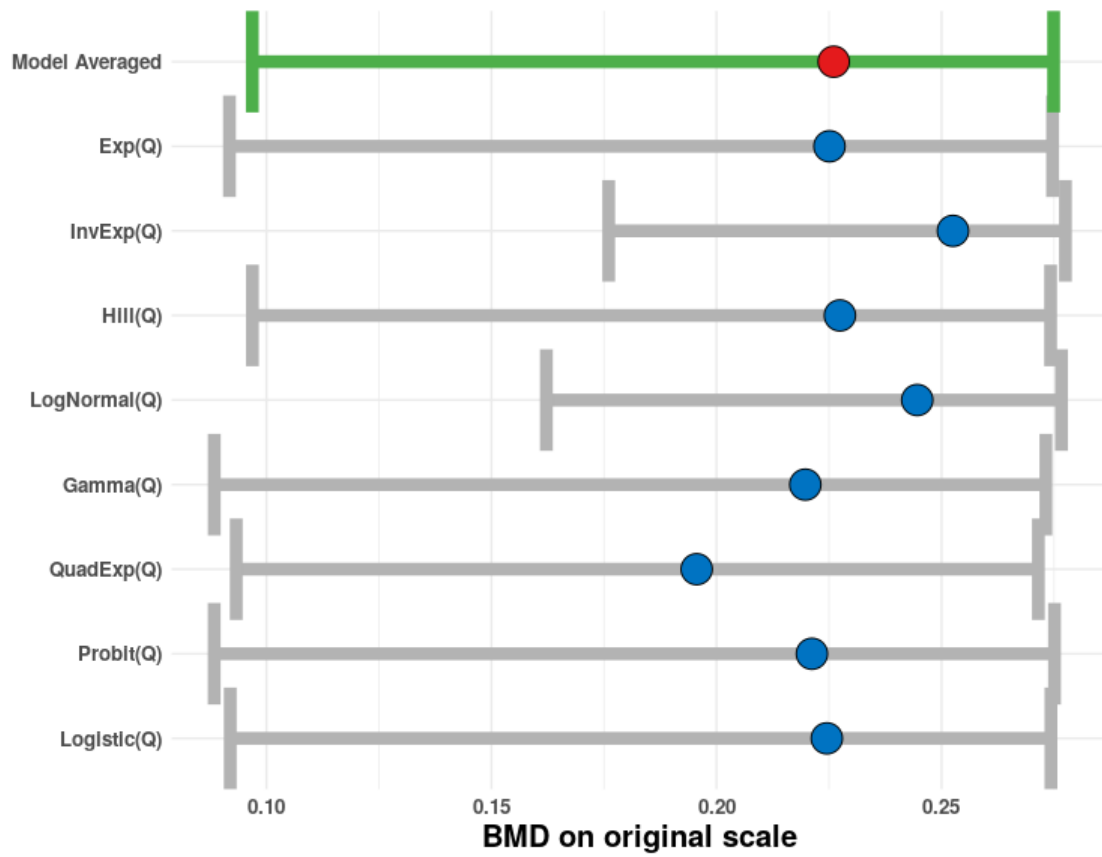

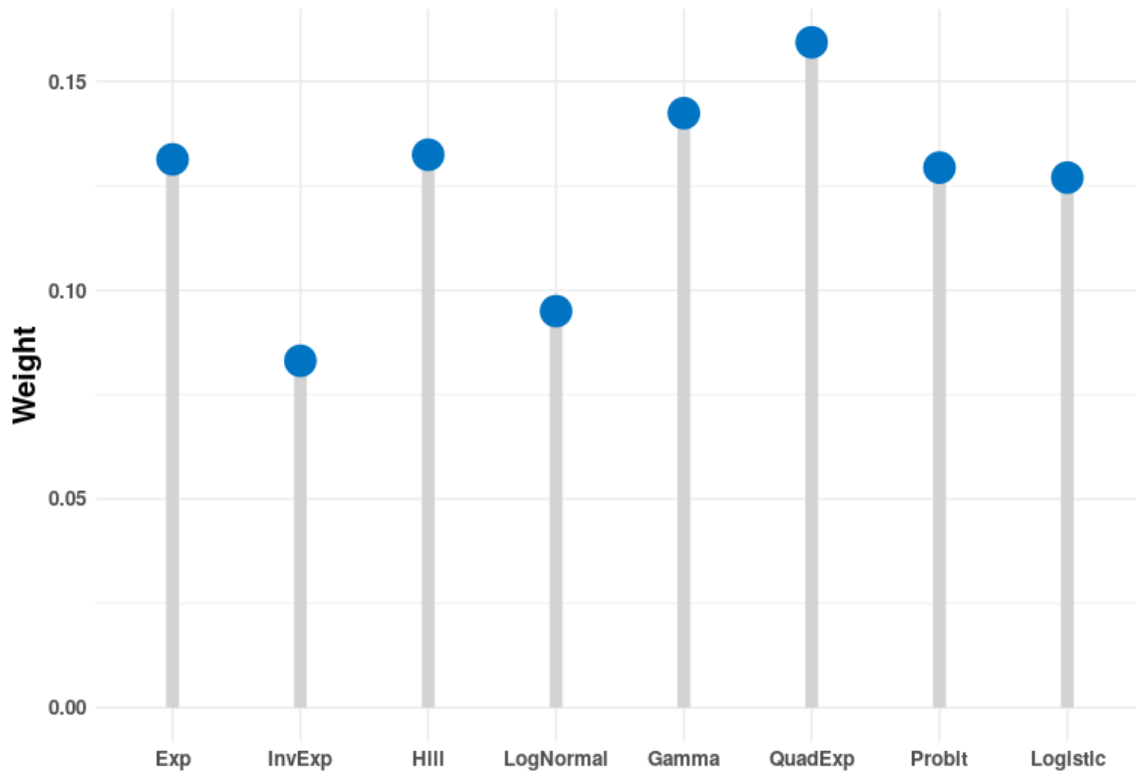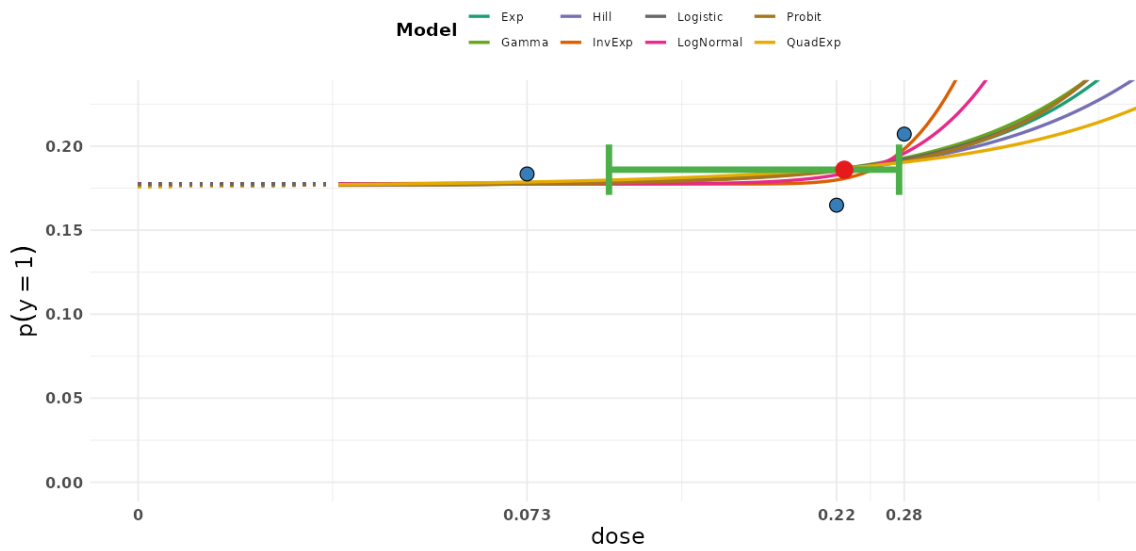

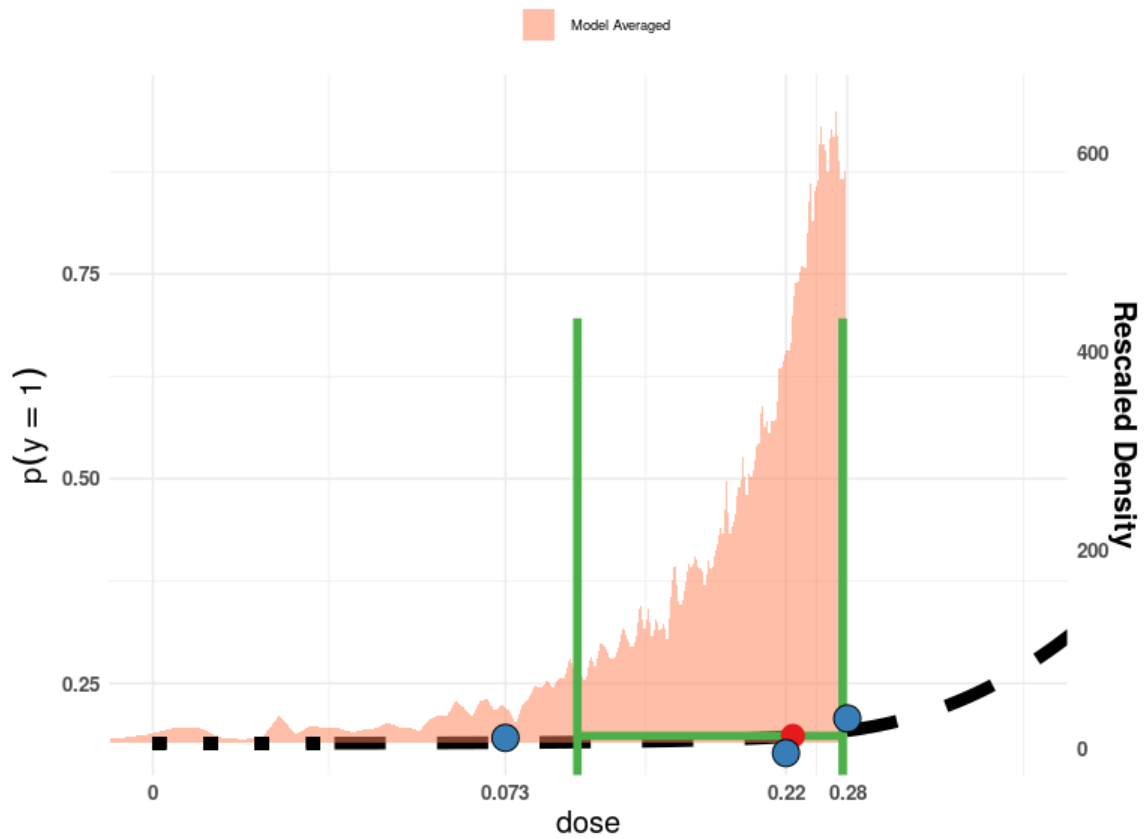

## Rahman et al. (2007) infant death, relative BMR 5%

### Data Description

The endpoint to be analyzed is: Adj.cases for infant death

Data used for analysis:

| Exposure.µg.kg.bw.per.day | Adj.cases | N    |
|---------------------------|-----------|------|
| 1.13                      | 237       | 5119 |
| 6.47                      | 267       | 5113 |
| 17.38                     | 282       | 5122 |
| 25.75                     | 306       | 5131 |
| 38.55                     | 281       | 5109 |

The 'Value for CES' is set to 0.00242728.

Extended dose range is not applied.

Informative background prior: min: 0.04583512; the most likely: 0.04629811; max: 0.04676109. Shape parameter is applied.

The 'Sampling Method' is set to Bridge Sampling.

### Results

*Information pertaining to this endpoint.*

### Goodness of Fit

Best fitting model fits sufficiently well (Bayes factor is 1.40e-03).

### Model Averaged BMD

| Model          | Type | BMDL  | BMD   | BMDU   |
|----------------|------|-------|-------|--------|
| Model Averaged | BS   | 0.975 | 5.343 | 12.063 |

### Estimated BMDs per model

| Model | BMDL  | BMD   | BMDU   | Model Weights | Converged |
|-------|-------|-------|--------|---------------|-----------|
| E4_Q  | 0.811 | 4.116 | 11.069 | 0.161         | 1         |
| IE4_Q | 1.749 | 5.998 | 14.543 | 0.008         | 1         |
| H4_Q  | 0.866 | 4.071 | 11.093 | 0.160         | 1         |
| LN4_Q | 1.444 | 5.474 | 13.823 | 0.030         | 1         |
| G4_Q  | 0.939 | 4.303 | 11.251 | 0.161         | 1         |
| QE4_Q | 5.638 | 8.034 | 13.470 | 0.212         | 1         |
| P4_Q  | 0.858 | 4.070 | 11.026 | 0.134         | 1         |
| L4_Q  | 0.896 | 4.268 | 12.011 | 0.134         | 1         |



**Plots of Fitted Models**

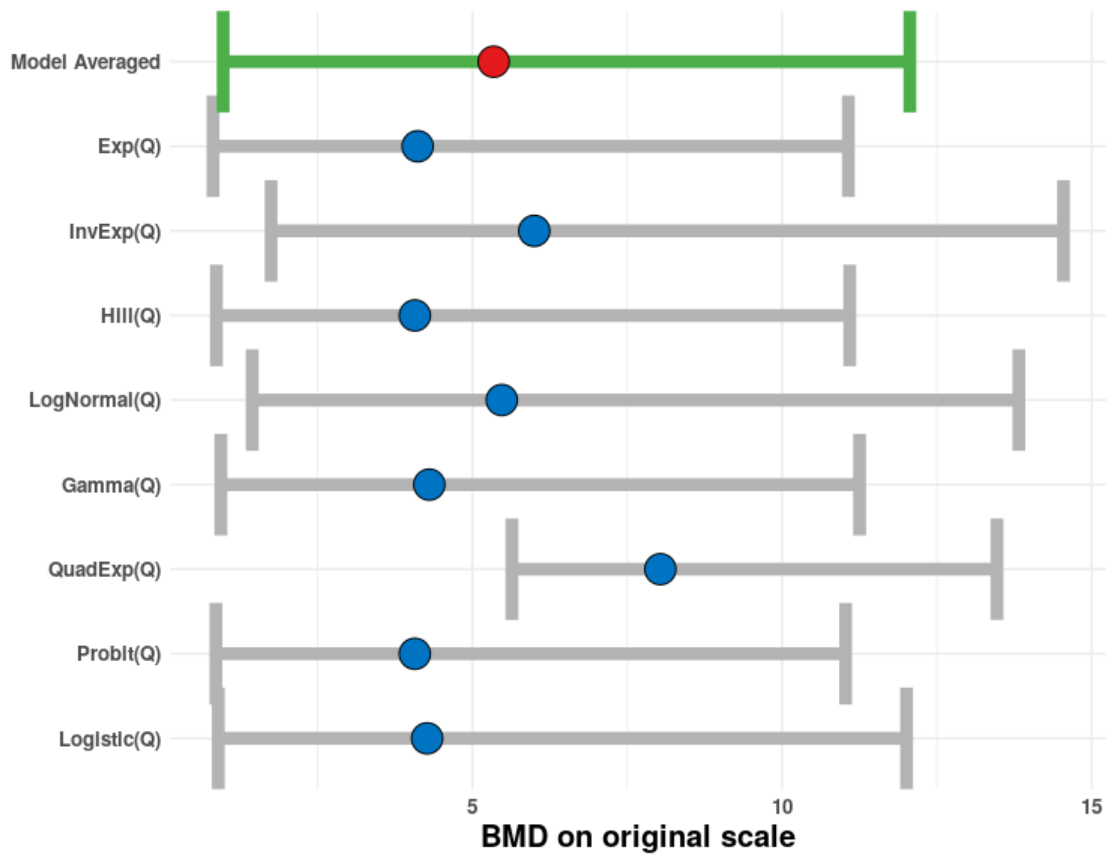

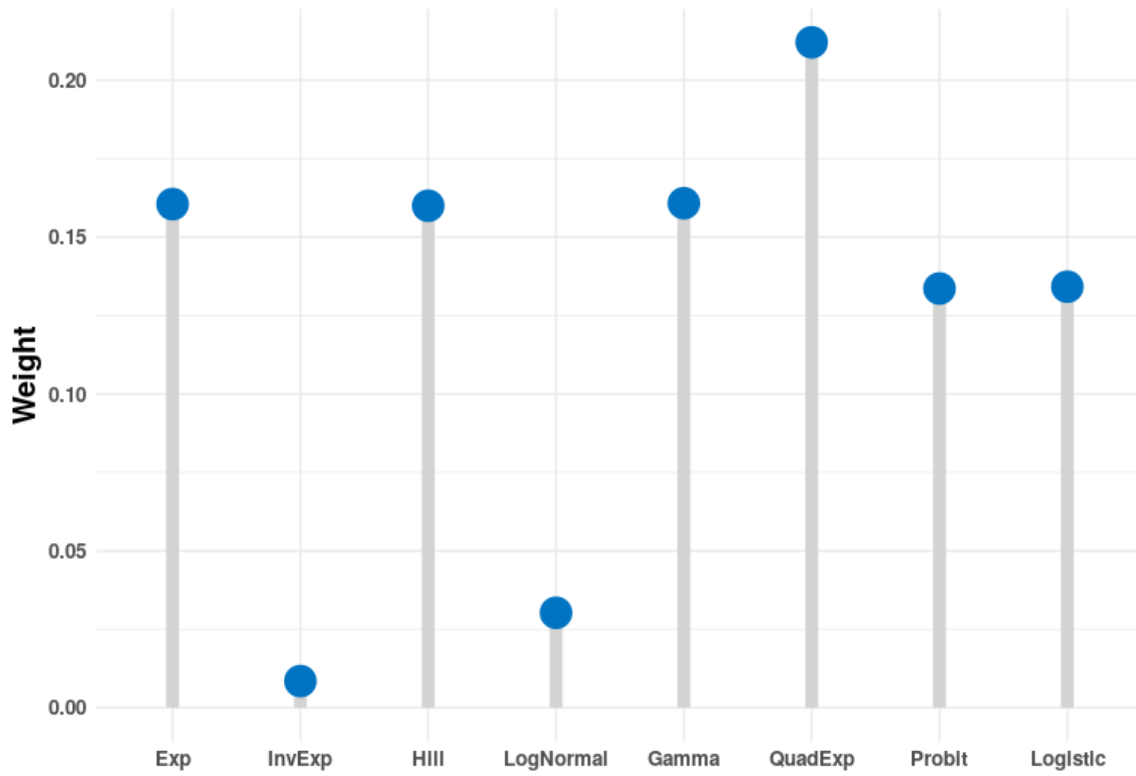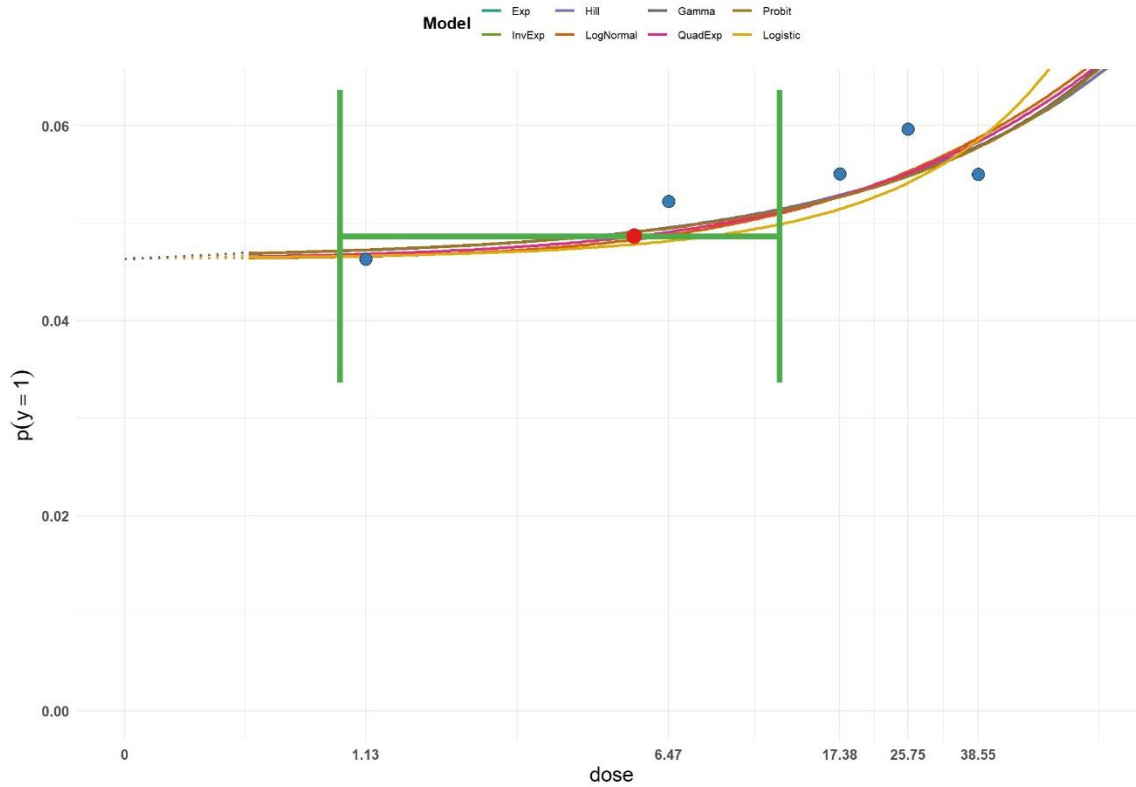

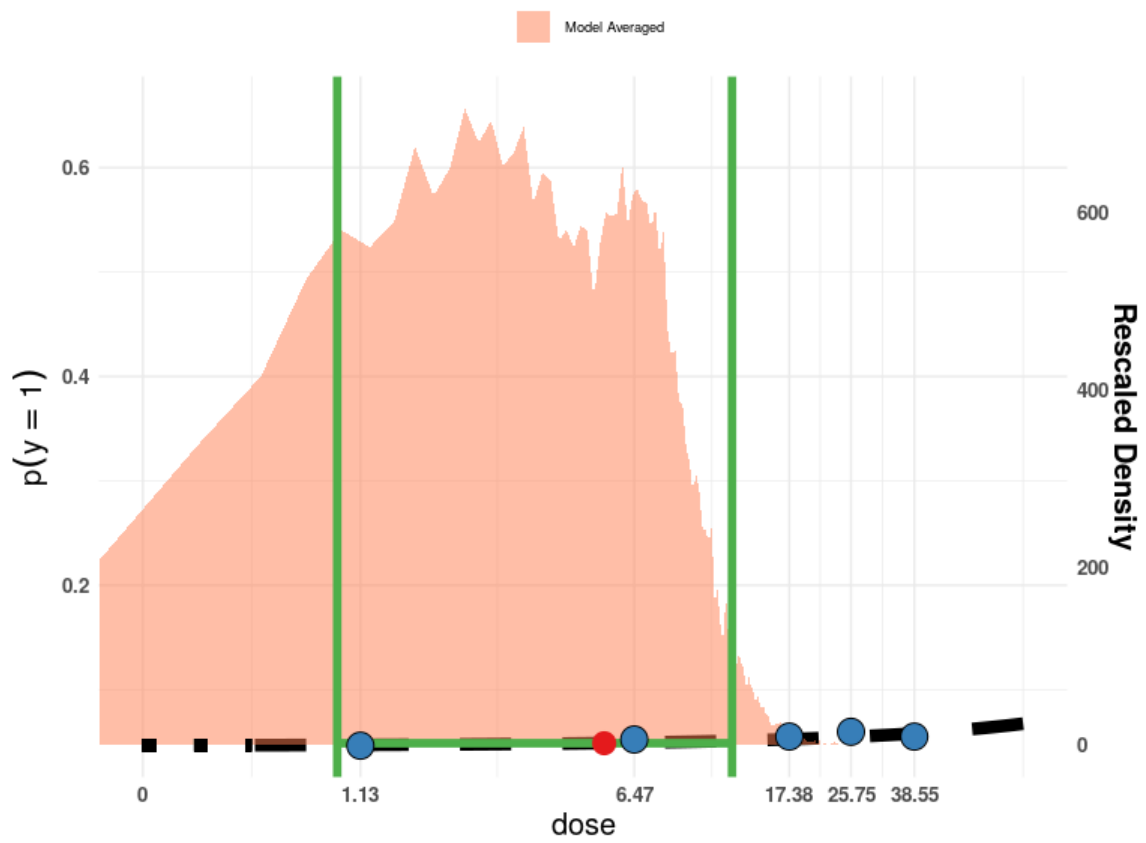

## Rahman et al. (2010) infant mortality, relative BMR 5%

### Data Description

The endpoint to be analyzed is: Adj.cases for infant mortality

Data used for analysis:

| Exposure.µg.kg.bw.per.day | Adj.cases | N   |
|---------------------------|-----------|-----|
| 1.09                      | 3         | 338 |
| 1.82                      | 5         | 342 |
| 3.42                      | 6         | 339 |
| 6.87                      | 7         | 335 |
| 14.18                     | 15        | 339 |

The 'Value for CES' is set to 0.000447761.

Extended dose range is not applied.

Informative background prior: min: 0.008786982; the most likely: 0.00887574; max: 0.008964497. Shape parameter is applied.

The 'Sampling Method' is set to Bridge Sampling.

### Results

*Information pertaining to this endpoint.*

The results do not fulfill the EFSA BMD guidance (EFSA Scientific Committee, 2022) recommendations since BMDU/BMDL > 50.

### Goodness of Fit

Best fitting model fits sufficiently well (Bayes factor is 8.13e-04).

**Model Averaged BMD**

| Model          | Type | BMDL  | BMD  | BMDU |
|----------------|------|-------|------|------|
| Model Averaged | BS   | 0.198 | 1.23 | 9.97 |

**Estimated BMDs per model**

| Model | BMDL  | BMD   | BMDU   | Model Weights | Converged |
|-------|-------|-------|--------|---------------|-----------|
| E4_Q  | 0.209 | 1.409 | 5.652  | 0.130         | 1         |
| IE4_Q | 0.889 | 5.605 | 12.483 | 0.089         | 0         |
| H4_Q  | 0.240 | 1.556 | 8.998  | 0.126         | 0         |
| LN4_Q | 0.486 | 3.126 | 11.564 | 0.121         | 1         |
| G4_Q  | 0.276 | 1.619 | 5.546  | 0.154         | 1         |
| QE4_Q | 0.177 | 0.367 | 0.990  | 0.246         | 1         |
| P4_Q  | 0.165 | 1.511 | 6.513  | 0.068         | 1         |
| L4_Q  | 0.156 | 1.631 | 7.346  | 0.066         | 1         |

**Plots of Fitted Models**

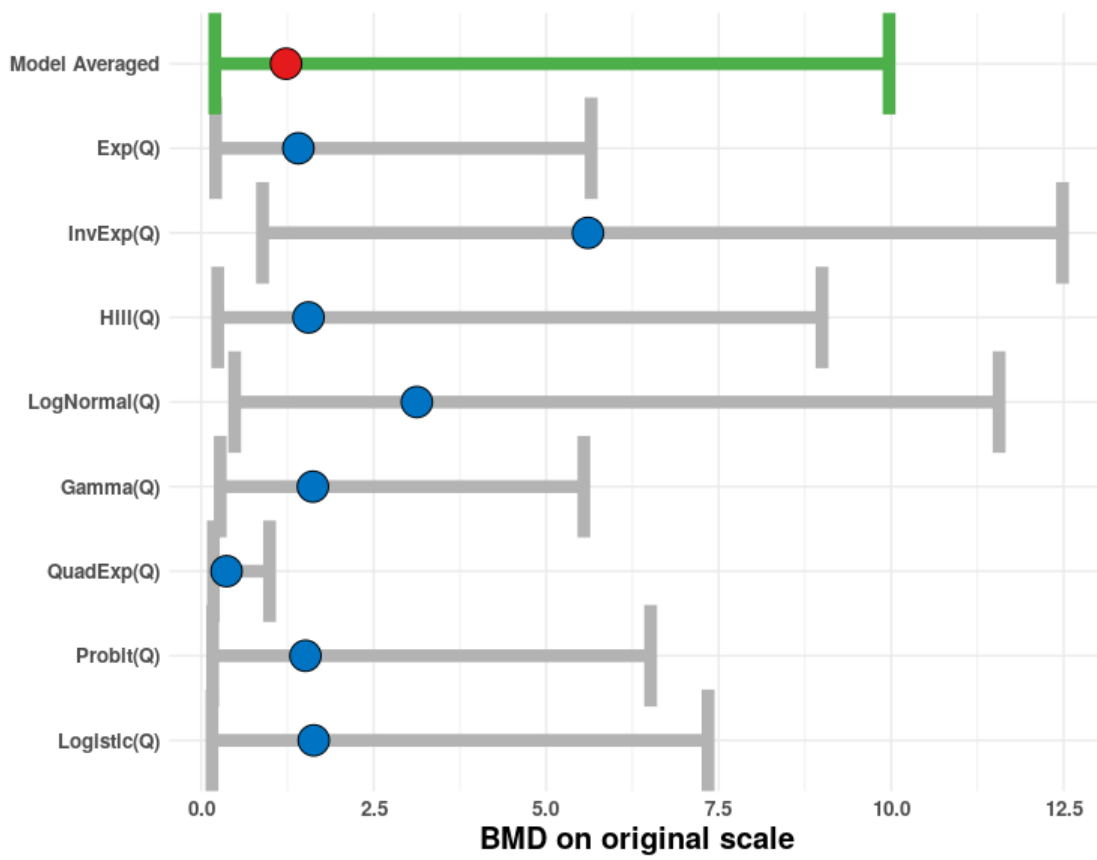

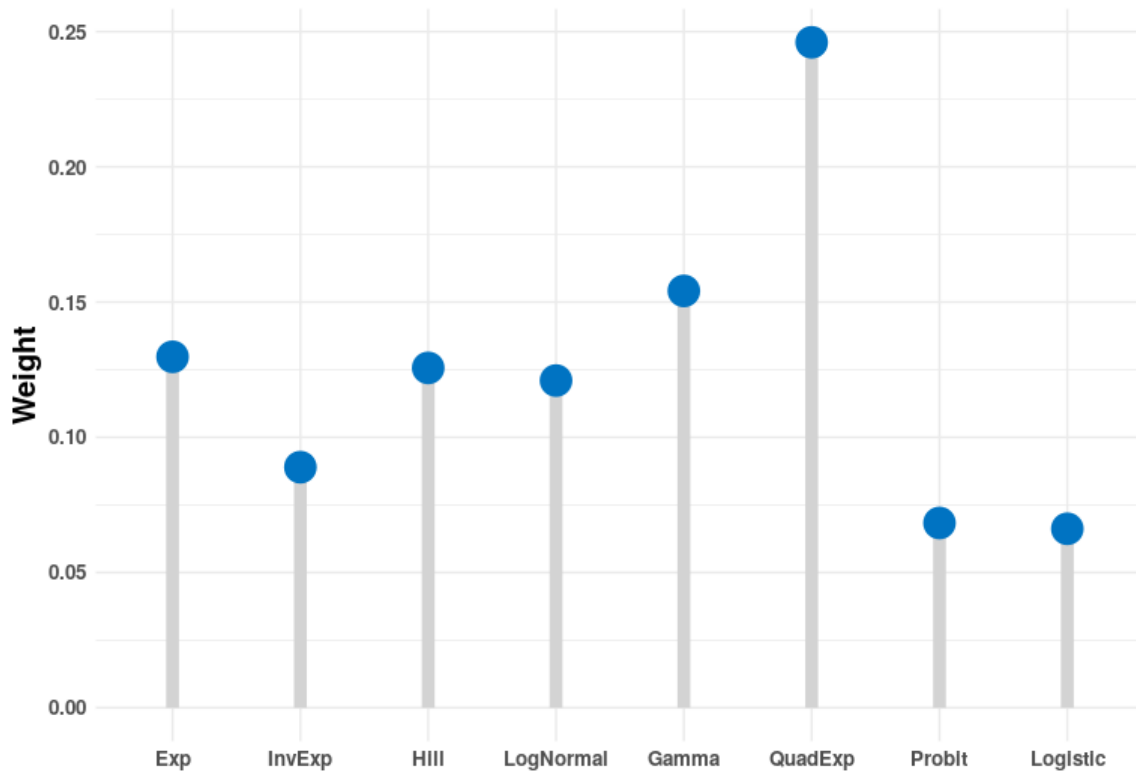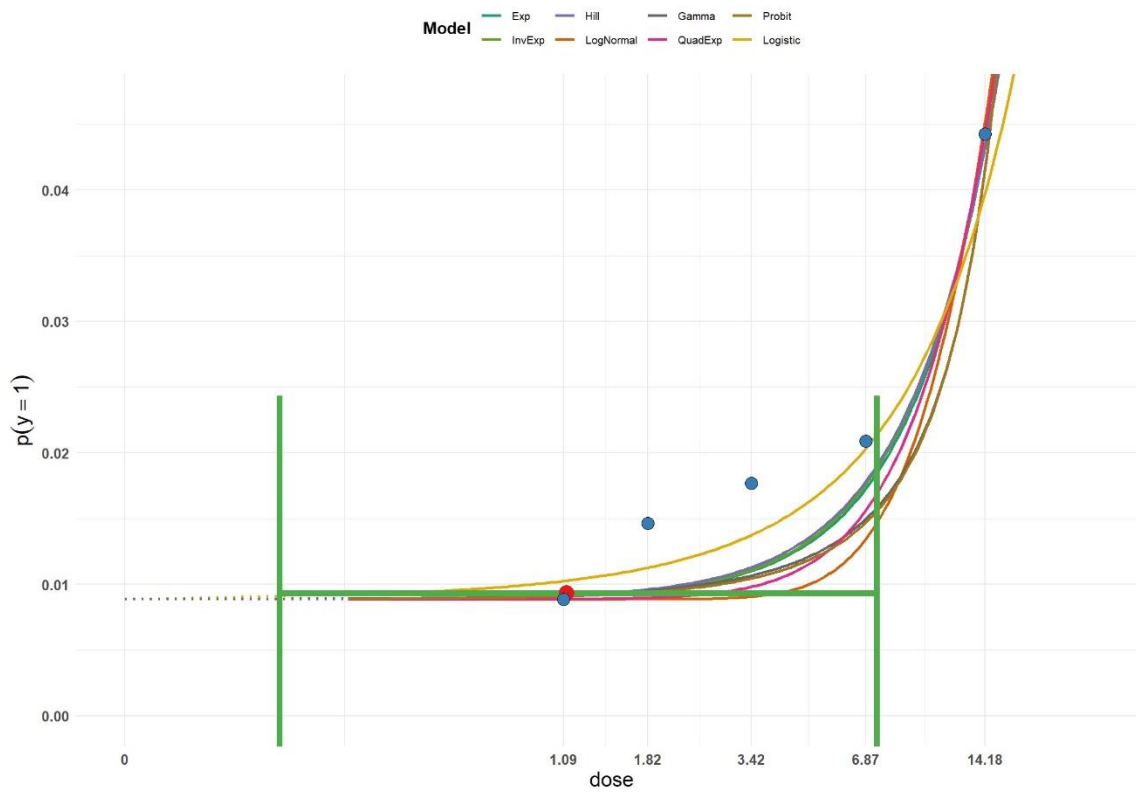

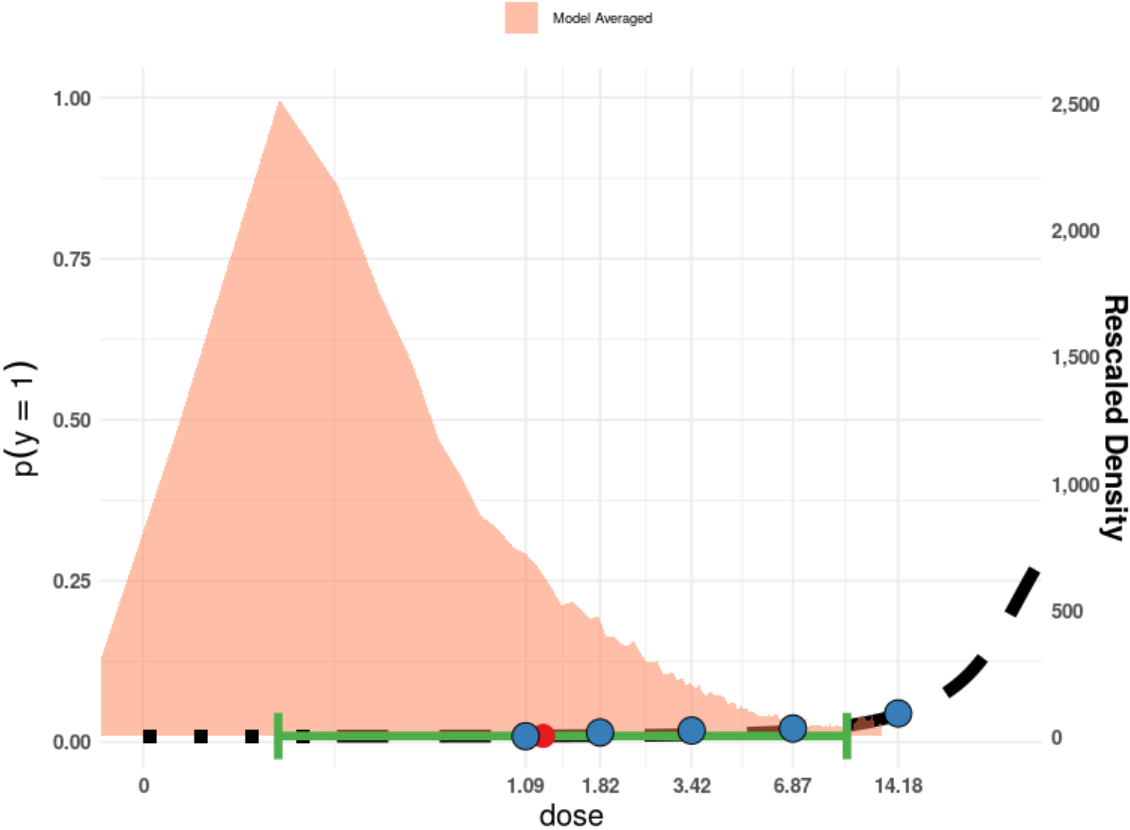



## Rahman et al. (2010) spontaneous abortion, relative BMR 5%

### Data Description

The endpoint to be analyzed is: Adj.cases for spontaneous abortion

| Exposure.µg.kg.bw.per.day | Adj.cases | N   |
|---------------------------|-----------|-----|
| 0.84                      | 45        | 553 |
| 1.53                      | 57        | 558 |
| 2.91                      | 63        | 567 |
| 6.44                      | 47        | 549 |
| 13.89                     | 63        | 557 |

The 'Value for CES' is set to 0.004429134.

Extended dose range is not applied.

Informative background prior: min: 0.080560579; the most likely: 0.081374322; max: 0.082188065. Shape parameter is applied.

The 'Sampling Method' is set to Bridge Sampling.

### Results

*Information pertaining to this endpoint.*

The study was rejected following visual screening due to the non-monotonic dose-response seen.

### Goodness of Fit

Best fitting model fits sufficiently well (Bayes factor is 1.81e-02).

### Model Averaged BMD

| Model          | Type | BMDL  | BMD   | BMDU   |
|----------------|------|-------|-------|--------|
| Model Averaged | BS   | 0.864 | 4.946 | 12.064 |

### Estimated BMDs per model

| Model | BMDL  | BMD    | BMDU   | Model Weights | Converged |
|-------|-------|--------|--------|---------------|-----------|
| E4_Q  | 0.519 | 4.993  | 12.007 | 0.132         | 1         |
| IE4_Q | 3.523 | 10.341 | 13.186 | 0.047         | 1         |
| H4_Q  | 0.552 | 5.229  | 12.030 | 0.138         | 1         |
| LN4_Q | 1.396 | 8.420  | 12.424 | 0.070         | 1         |
| G4_Q  | 0.675 | 5.295  | 11.598 | 0.139         | 1         |
| QE4_Q | 1.484 | 3.452  | 10.527 | 0.237         | 1         |
| P4_Q  | 0.672 | 5.246  | 12.122 | 0.115         | 1         |
| L4_Q  | 0.686 | 5.383  | 11.652 | 0.122         | 1         |

**Plots of Fitted Models**

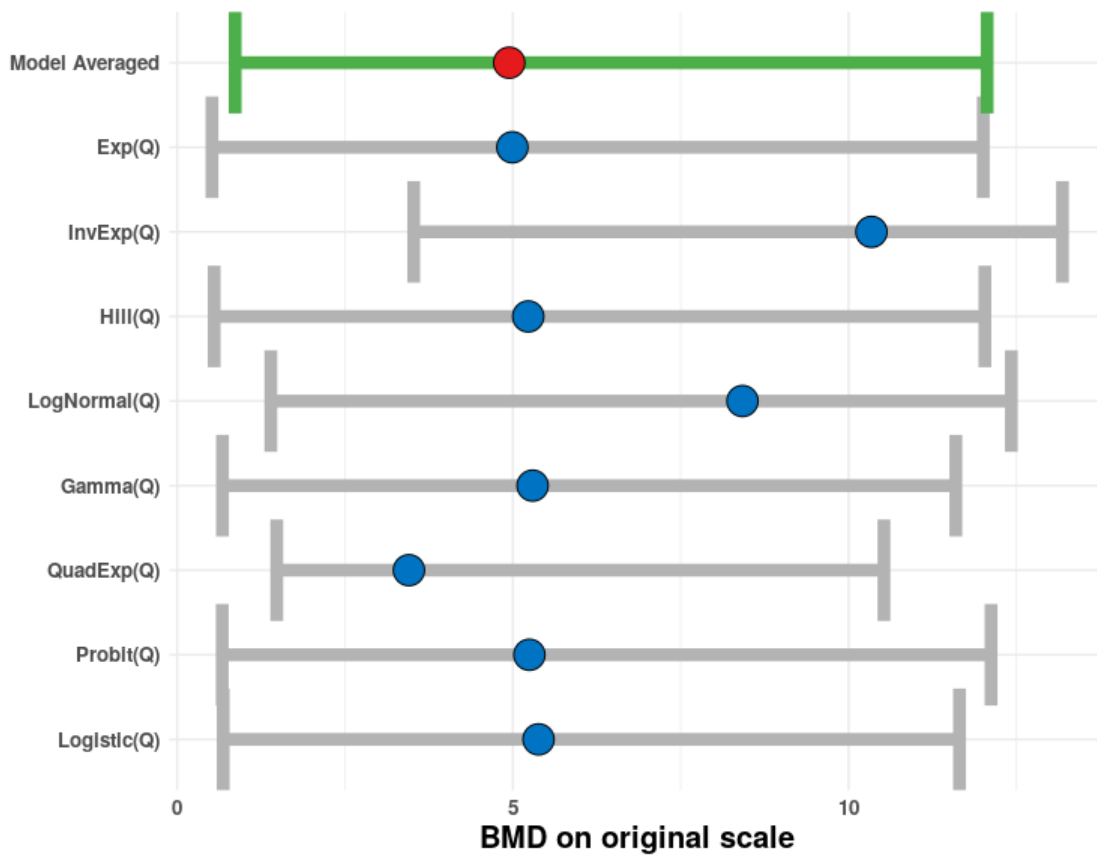

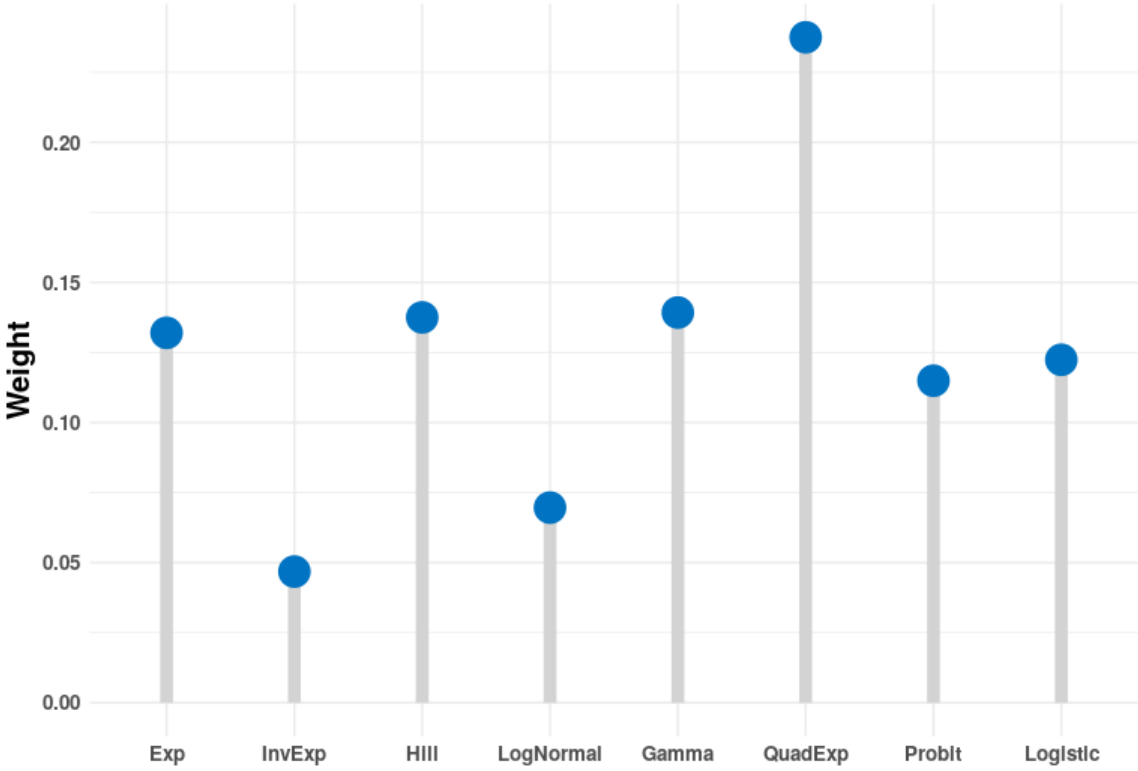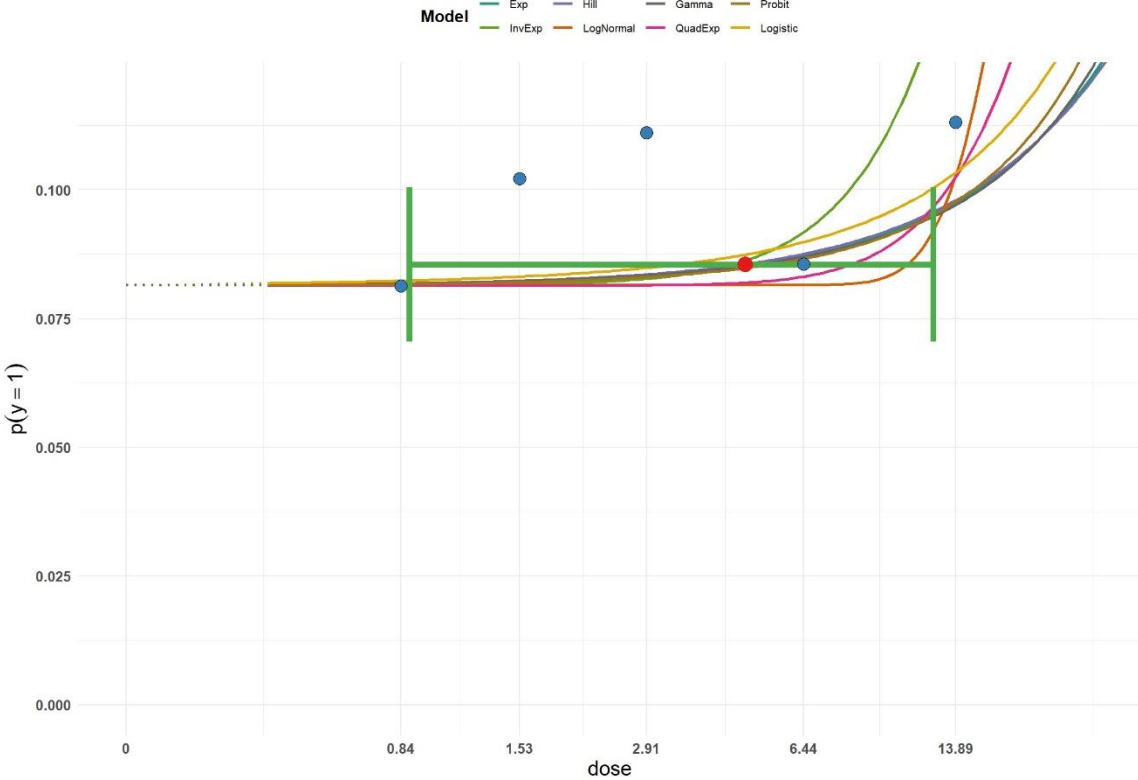

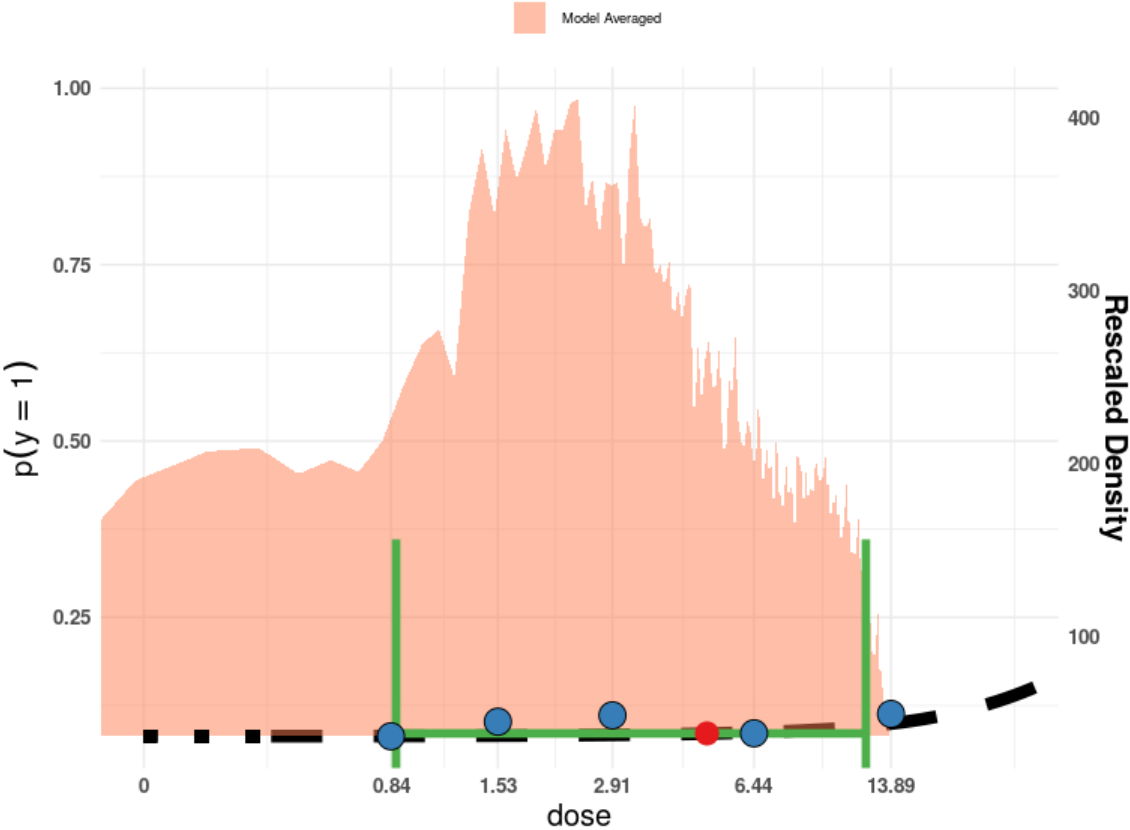

## Rahman et al. (2010) stillbirth, relative BMR 5%

### Data Description

The endpoint to be analyzed is: Adj.cases for stillbirth

Data used for analysis:

| Exposure.µg.kg.bw.per.day | Adj.cases | N   |
|---------------------------|-----------|-----|
| 1.09                      | 3         | 341 |
| 1.82                      | 6         | 348 |
| 3.42                      | 7         | 346 |
| 6.87                      | 10        | 345 |
| 14.18                     | 6         | 345 |

The 'Value for CES' is set to 0.000443787.

Extended dose range is not applied.

Informative background prior: min: 0.008709677; the most likely; 0.008797654; max: 0.00888563. Shape parameter is applied.

The 'Sampling Method' is set to Bridge Sampling.

### Results

*Information pertaining to this endpoint.*

The results do not fulfill the EFSA BMD guidance (2022) recommendations since BMDU/BMDL > 50.

### Goodness of Fit

Best fitting model fits sufficiently well (Bayes factor is 3.38e-02).

**Model Averaged BMD**

| Model          | Type | BMDL  | BMD   | BMDU   |
|----------------|------|-------|-------|--------|
| Model Averaged | BS   | 0.126 | 1.132 | 11.527 |

**Estimated BMDs per model**

| Model | BMDL  | BMD   | BMDU   | Model Weights | Converged |
|-------|-------|-------|--------|---------------|-----------|
| E4_Q  | 0.072 | 1.183 | 10.999 | 0.139         | 1         |
| IE4_Q | 0.281 | 4.081 | 13.116 | 0.028         | 0         |
| H4_Q  | 0.072 | 1.275 | 11.743 | 0.135         | 1         |
| LN4_Q | 0.177 | 2.430 | 12.537 | 0.056         | 1         |
| G4_Q  | 0.071 | 1.252 | 10.613 | 0.138         | 1         |
| QE4_Q | 0.260 | 0.721 | 9.210  | 0.337         | 1         |
| P4_Q  | 0.088 | 2.176 | 12.260 | 0.083         | 1         |
| L4_Q  | 0.095 | 2.778 | 12.570 | 0.085         | 1         |

**Plots of Fitted Models**

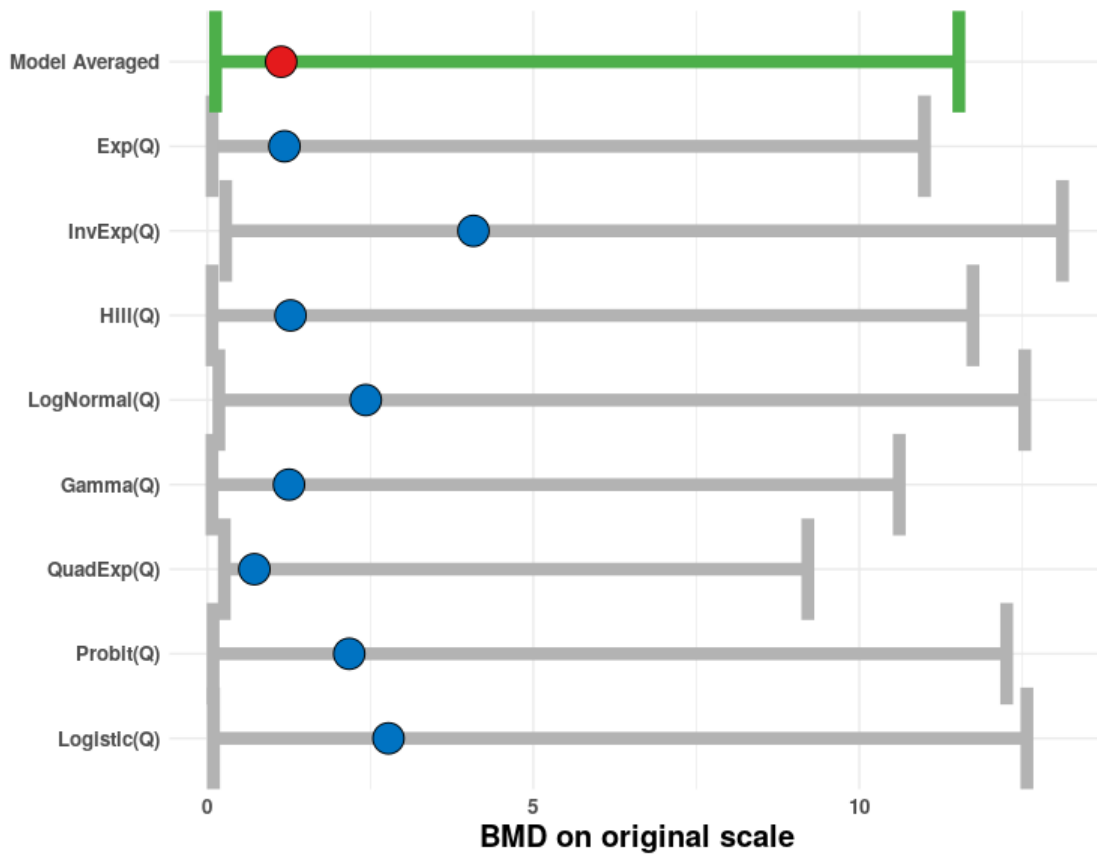

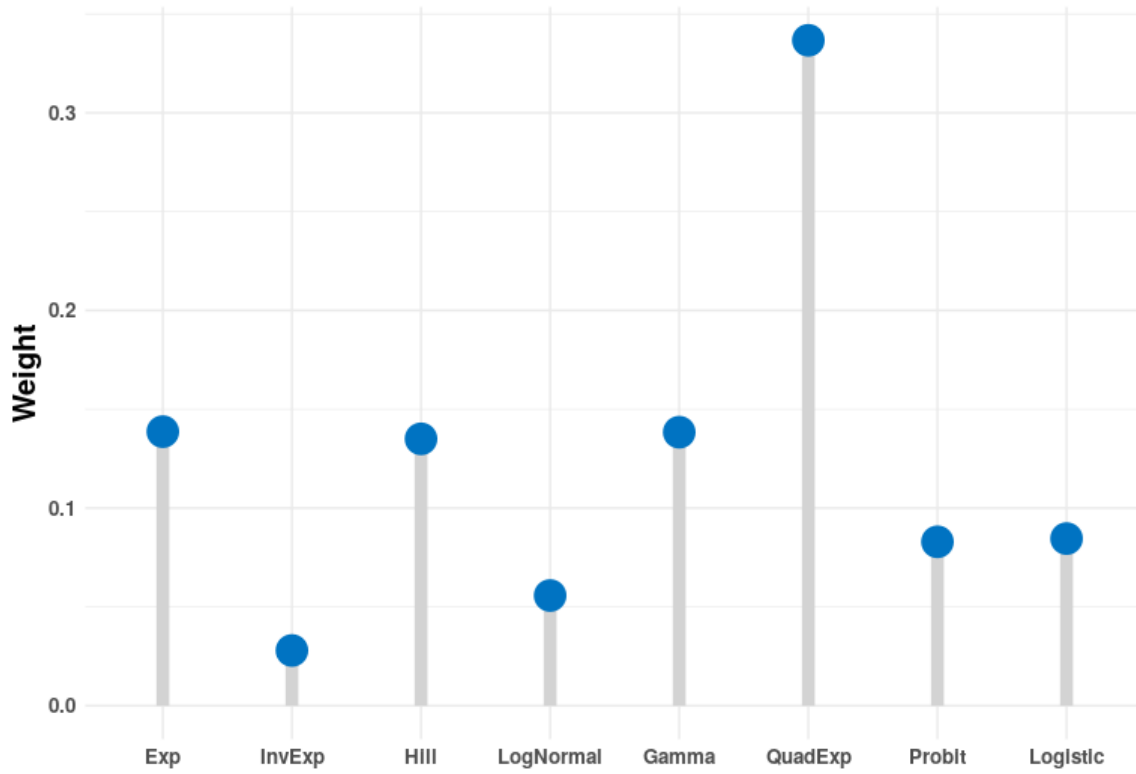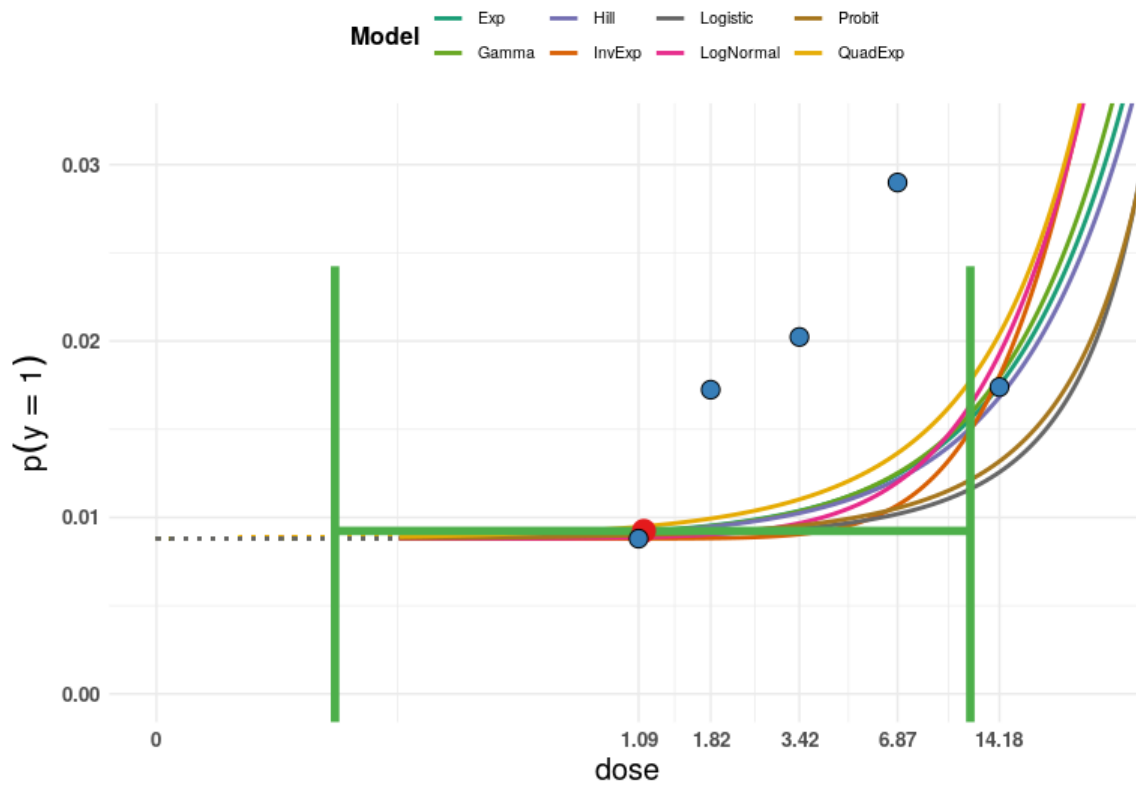



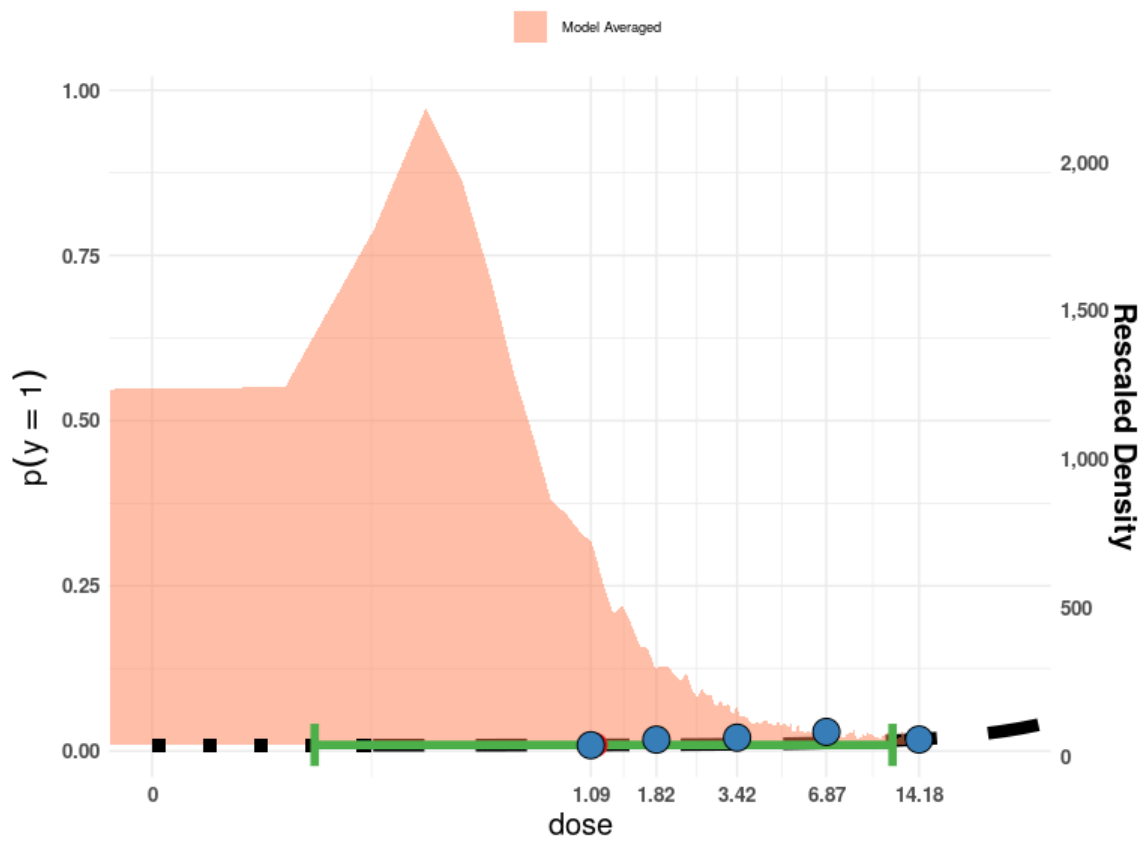

## Richter et al. (2022) congenital heart disease, relative BMR 5%

### Data Description

The endpoint to be analyzed is: Adj.cases for congenital heart disease

Data used for analysis:

| Exposure, µg.kg.bw.per.day | Adj.cases | N      |
|----------------------------|-----------|--------|
| 0.12                       | 4453      | 495970 |
| 0.13                       | 2413      | 235630 |
| 0.17                       | 3522      | 292222 |
| 0.22                       | 239       | 18591  |

The 'Value for CES' is set to 0.000452985.

Extended dose range is not applied.

Informative background prior: min: 0.008888582; the most likely: 0.008978366; max: 0.009068149. Shape parameter is applied.

The 'Sampling Method' is set to Bridge Sampling.

### Results

*Information pertaining to this endpoint.*

The results do not fulfill the EFSA BMD guidance (2022) recommendations since none of the candidate models fit the data sufficiently well.

### Goodness of Fit

None of the models provide an adequate fit do the data (Bayes factor is 8.00e+04).

### Model Averaged BMD

| Model          | Type | BMDL  | BMD   | BMDU |
|----------------|------|-------|-------|------|
| Model Averaged | BS   | 0.105 | 0.113 | 0.12 |

### Estimated BMDs per model

| Model | BMDL  | BMD   | BMDU  | Model Weights | Converged |
|-------|-------|-------|-------|---------------|-----------|
| E4_Q  | 0.100 | 0.108 | 0.115 | 0.026         | 1         |
| IE4_Q | 0.108 | 0.114 | 0.121 | 0.642         | 1         |
| H4_Q  | 0.100 | 0.108 | 0.115 | 0.027         | 1         |
| LN4_Q | 0.104 | 0.112 | 0.118 | 0.226         | 1         |
| G4_Q  | 0.102 | 0.109 | 0.116 | 0.075         | 1         |
| QE4_Q | 0.067 | 0.073 | 0.079 | 0.000         | 1         |
| P4_Q  | 0.097 | 0.105 | 0.112 | 0.003         | 1         |
| L4_Q  | 0.096 | 0.104 | 0.111 | 0.002         | 1         |

**Plots of Fitted Models**

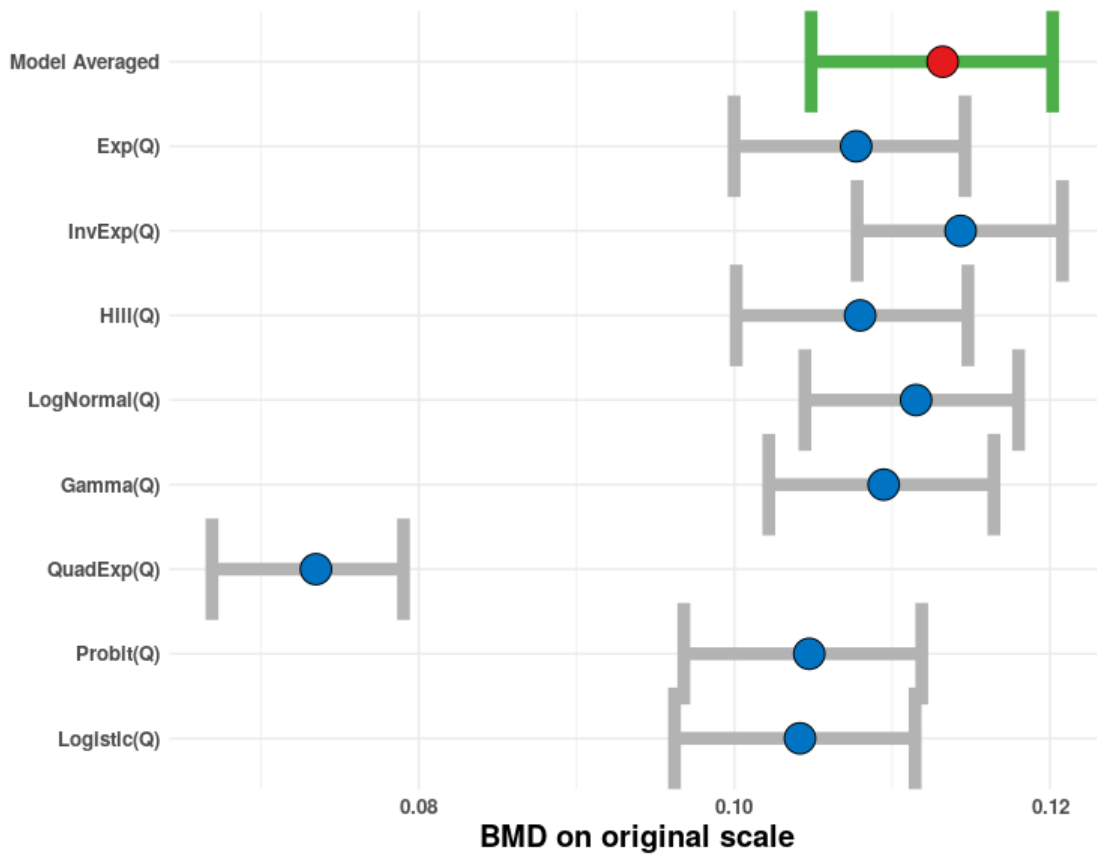

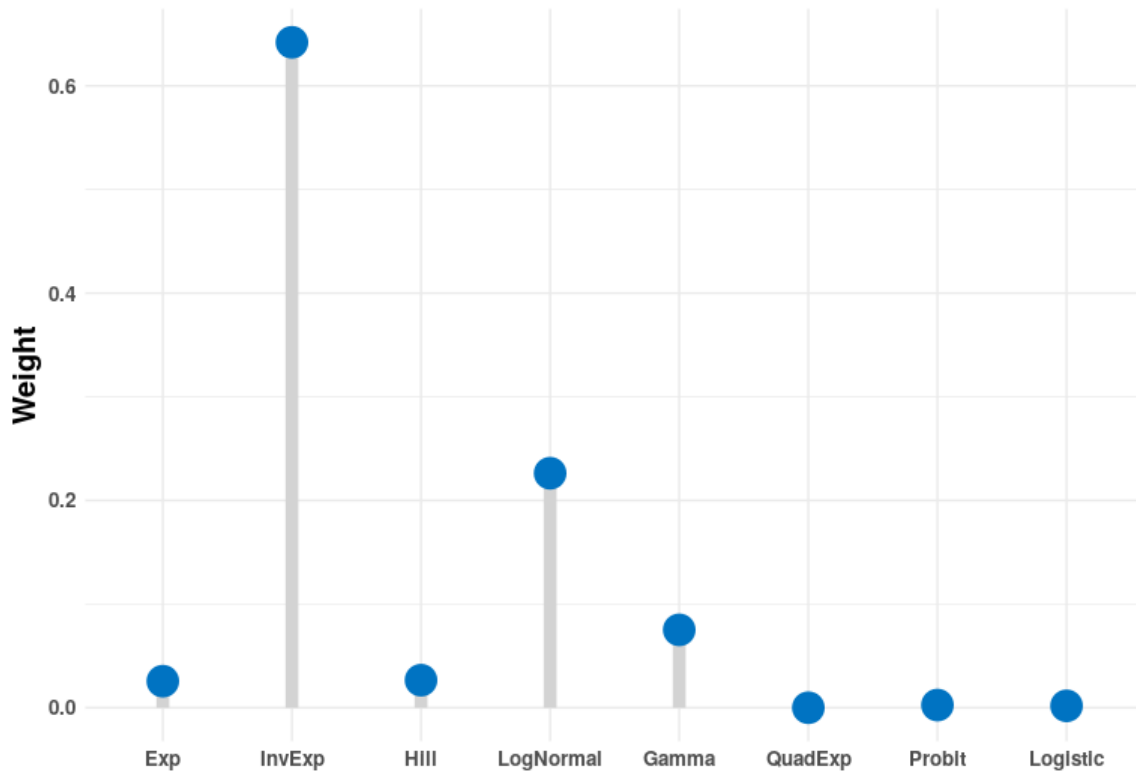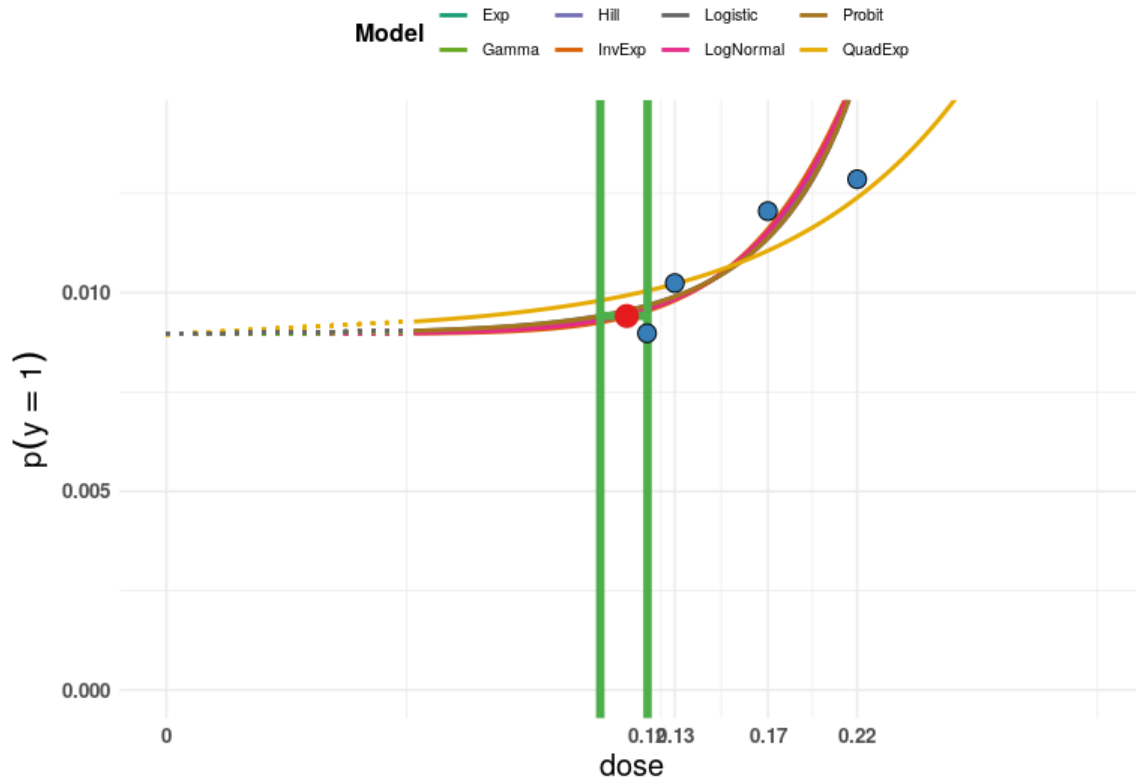

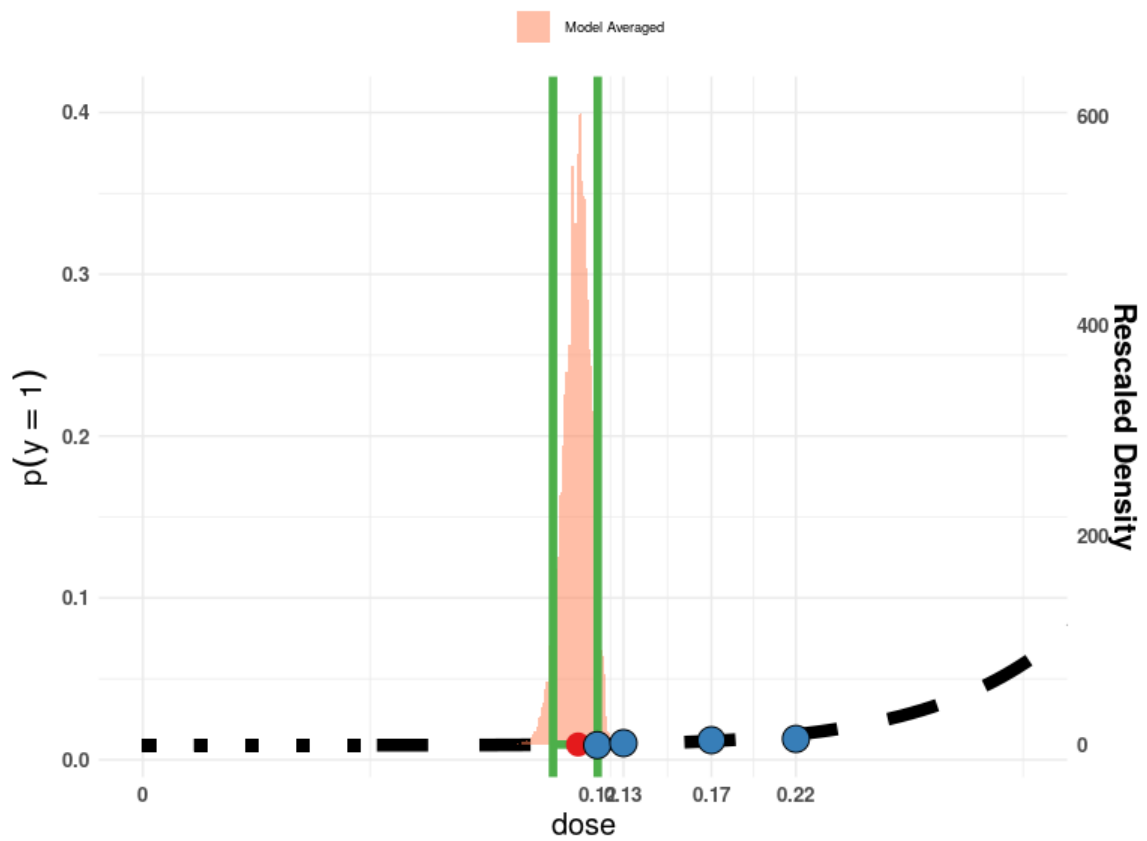

## Siddique et al. (2020) asthma symptoms, relative BMR 5%

### Data Description

The endpoint to be analyzed is: Adj.cases for asthma symptoms

Data used for analysis:

| Exposure.µg.kg.bw.per.day | Adj.cases | N   |
|---------------------------|-----------|-----|
| 1.28                      | 14        | 279 |
| 6.16                      | 27        | 281 |
| 71.45                     | 46        | 282 |

The 'Value for CES' is set to 0.002641509.

Extended dose range is not applied.

Informative background prior: min: 0.049677419; the most likely: 0.050179211; max: 0.050681004. Shape parameter is applied.

The 'Sampling Method' is set to Bridge Sampling.

### Results

*Information pertaining to this endpoint.*

The results do not fulfill the EFSA BMD guidance (EFSA Scientific Committee, 2022) recommendations since none of the candidate models fit the data sufficiently well, BMD/BMDL > 20 and BMDU/BMDL > 50.

### Goodness of Fit

None of the models provide an adequate fit do the data (Bayes factor is 2.78e+01).

### Model Averaged BMD

| Model          | Type | BMDL  | BMD   | BMDU   |
|----------------|------|-------|-------|--------|
| Model Averaged | BS   | 0.475 | 9.927 | 51.257 |

### Estimated BMDs per model

| Model | BMDL  | BMD    | BMDU   | Model Weights | Converged |
|-------|-------|--------|--------|---------------|-----------|
| E4_Q  | 0.202 | 7.914  | 34.109 | 0.111         | 1         |
| IE4_Q | 1.119 | 35.197 | 53.617 | 0.123         | 1         |
| H4_Q  | 0.228 | 8.175  | 33.911 | 0.119         | 0         |
| LN4_Q | 1.402 | 40.924 | 56.749 | 0.124         | 0         |
| G4_Q  | 0.292 | 12.145 | 38.251 | 0.155         | 1         |
| QE4_Q | 1.260 | 2.267  | 6.268  | 0.212         | 1         |
| P4_Q  | 0.482 | 17.956 | 43.066 | 0.087         | 1         |
| L4_Q  | 0.370 | 13.737 | 38.688 | 0.070         | 1         |

**Plots of Fitted Models**

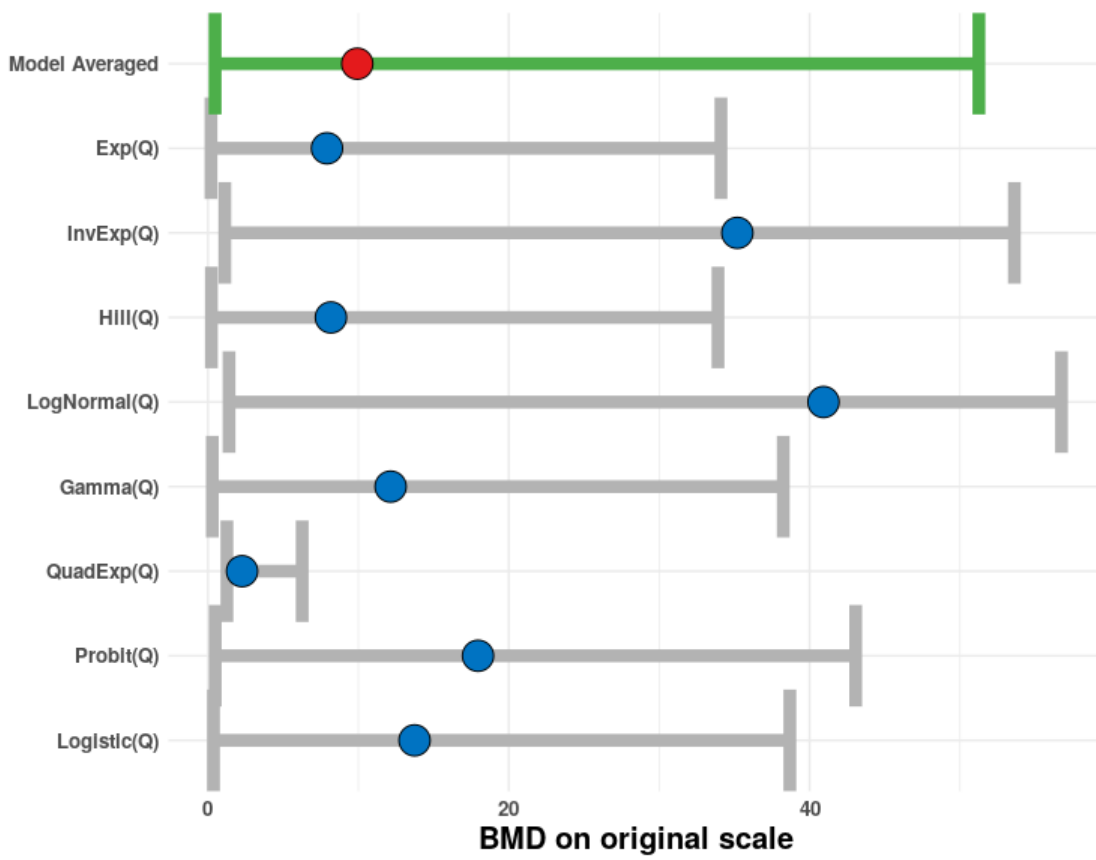

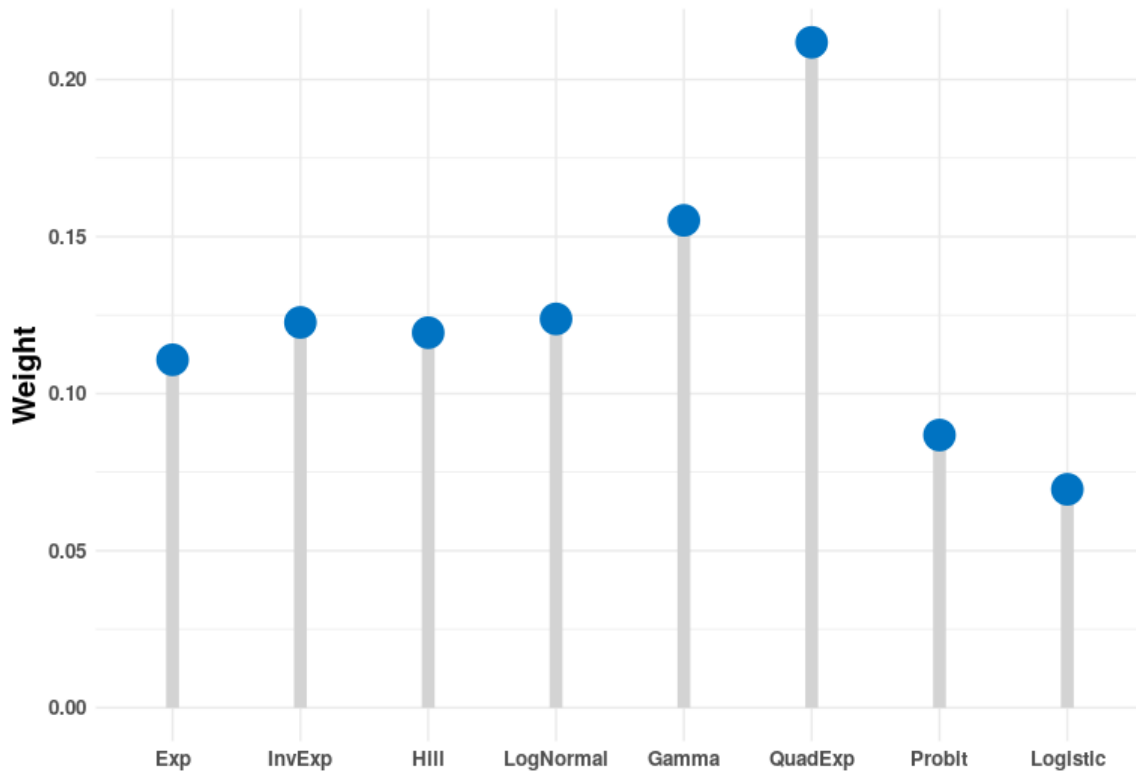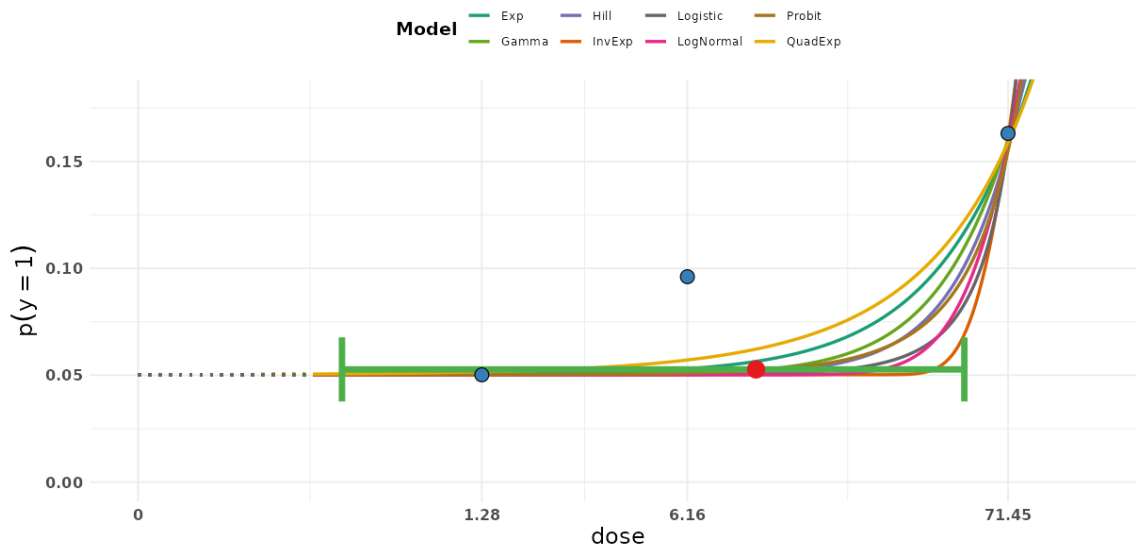



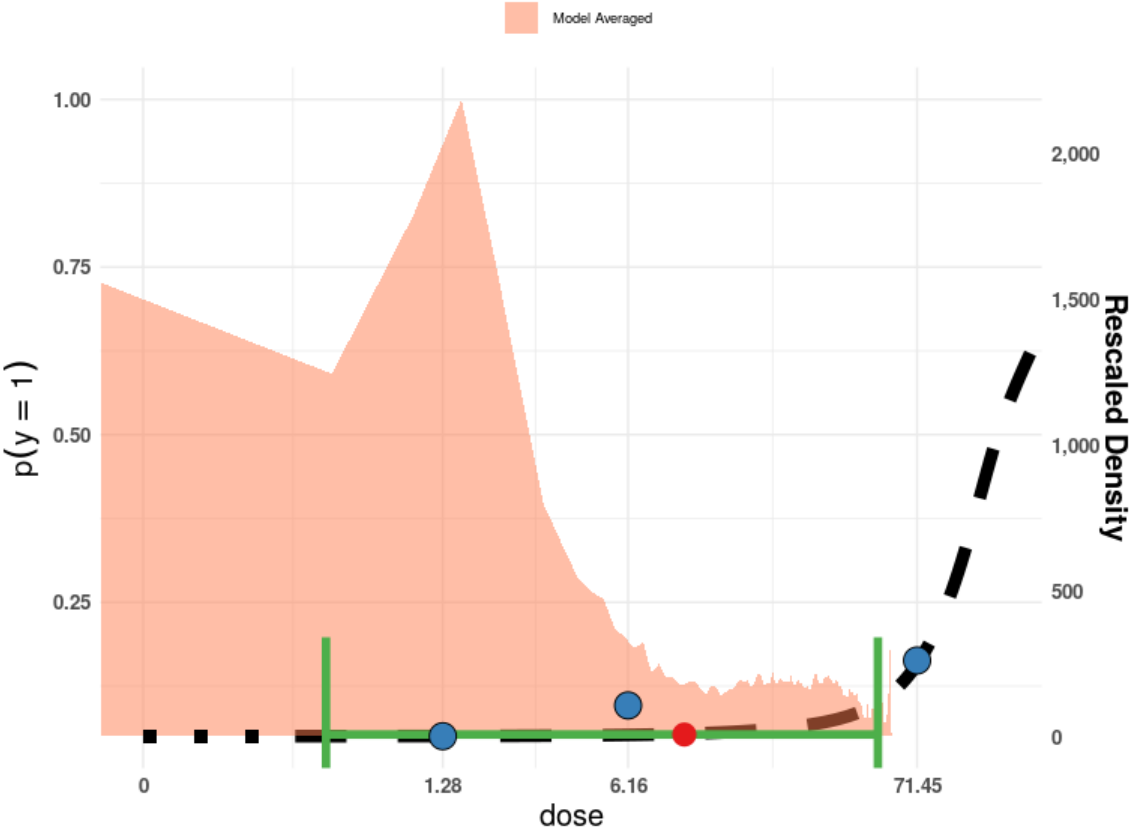

## Siddique et al. (2020) FEV1 (lung function), BMR 5%

### Data Description

The endpoint to be analyzed is: FEV1 response

Data used for analysis:

| Exposure.µg.kg.bw.per.day | Response | SD    | N   |
|---------------------------|----------|-------|-----|
| 1.28                      | 1.578    | 0.575 | 279 |
| 6.16                      | 1.455    | 0.578 | 281 |
| 71.45                     | 1.375    | 0.797 | 282 |

The 'Value for CES' is set to 0.05.

Extended dose range is not applied.

Informative background prior: min: 1.4202; the most likely: 1.578; max: 1.7358. Shape parameter is applied.

The 'Sampling Method' is set to Bridge Sampling.

### Results

*Information pertaining to this endpoint.*

The results do not fulfill the EFSA BMD guidance (2022) recommendations since none of the candidate models fit the data sufficiently well.

#### Check for constant variance coefficient of variation

distributional assumption of constant variance for the normal distribution is not met, Bartlett test p-value is 0.0000

distributional assumption of constant variance (on log-scale) is not met, Bartlett test p-value is 0.0000

#### Goodness of Fit

None of the models provide an adequate fit do the data (Bayes factor is 3.46e+01).

#### Model Averaged BMD

| Model          | Type | BMDL  | BMD    | BMDU   |
|----------------|------|-------|--------|--------|
| Model Averaged | BS   | 1.115 | 4.163  | 23.827 |
| Model Averaged | BS   | 2.193 | 10.390 | 60.440 |
| Model Averaged | BS   | 2.705 | 28.216 | 66.152 |
| Model Averaged | BS   | 1.256 | 3.735  | 7.077  |

| Model          | Type | BMDL  | BMD   | BMDU   |
|----------------|------|-------|-------|--------|
| Model Averaged | BS   | 1.314 | 4.749 | 40.021 |

**Estimated BMDs per model**

| Model  | BMDL  | BMD    | BMDU   | Model Weights | Converged |
|--------|-------|--------|--------|---------------|-----------|
| E4_N   | 2.502 | 19.134 | 62.961 | 0.000         | 1         |
| IE4_N  | 2.251 | 15.782 | 65.551 | 0.000         | 1         |
| H4_N   | 2.410 | 18.157 | 64.883 | 0.000         | 1         |
| LN4_N  | 2.637 | 22.090 | 64.432 | 0.000         | 1         |
| G4_N   | 2.465 | 19.188 | 62.784 | 0.000         | 1         |
| QE4_N  | 2.200 | 23.129 | 59.294 | 0.000         | 1         |
| P4_N   | 2.301 | 20.039 | 64.830 | 0.000         | 1         |
| L4_N   | 2.180 | 15.180 | 63.218 | 0.000         | 1         |
| E4_LN  | 1.091 | 4.444  | 16.373 | 0.118         | 1         |
| IE4_LN | 1.316 | 4.371  | 8.907  | 0.098         | 1         |
| H4_LN  | 1.001 | 4.053  | 15.185 | 0.122         | 1         |
| LN4_LN | 1.249 | 4.494  | 12.050 | 0.103         | 1         |
| G4_LN  | 0.134 | 5.245  | 26.279 | 0.128         | 0         |
| QE4_LN | 1.239 | 2.924  | 13.286 | 0.233         | 1         |
| P4_LN  | 1.289 | 4.539  | 16.611 | 0.096         | 1         |
| L4_LN  | 1.318 | 4.466  | 14.283 | 0.102         | 1         |

**Plots of Fitted Models**

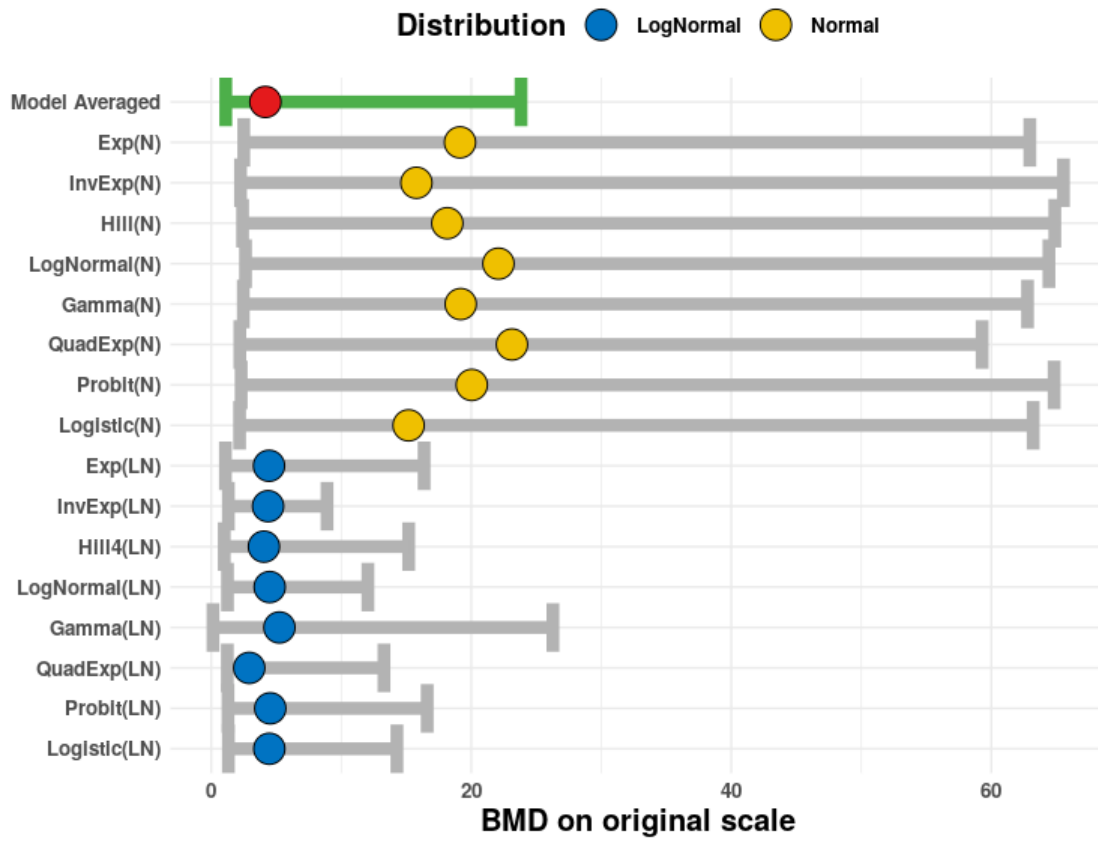

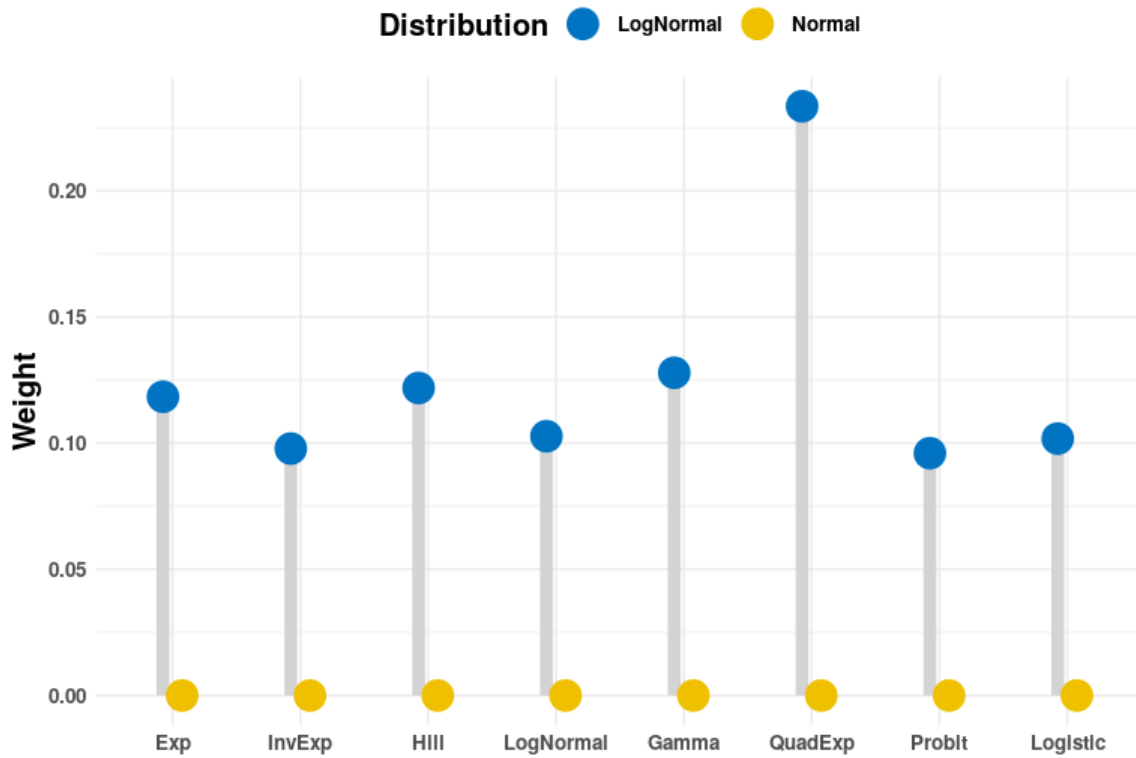

**Normal distribution**

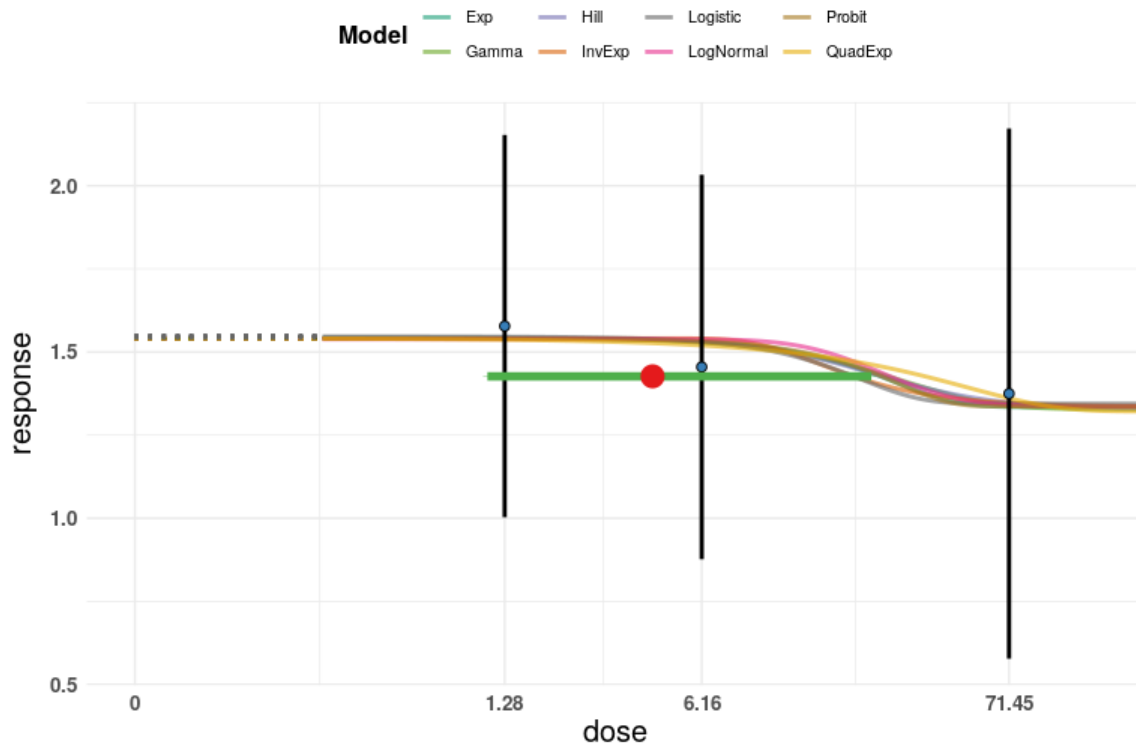

data and vertical bars based on arithmetic sample means and standard deviations

### LogNormal distribution

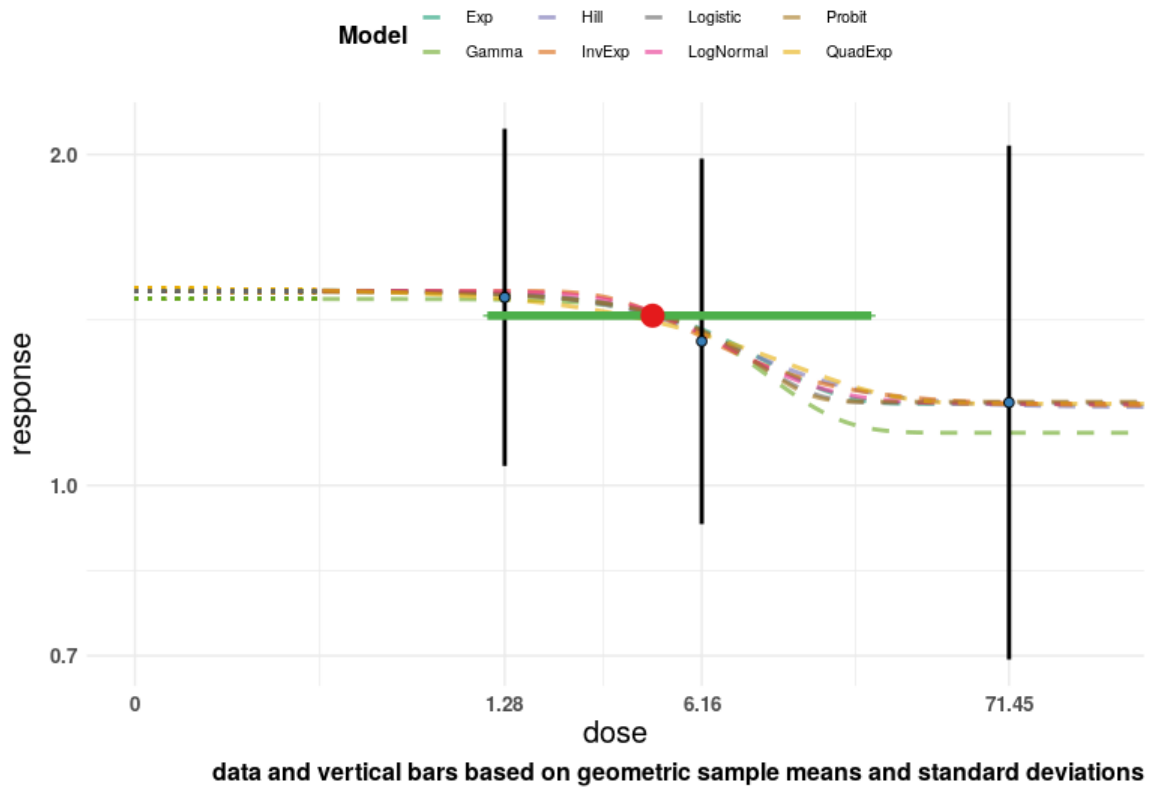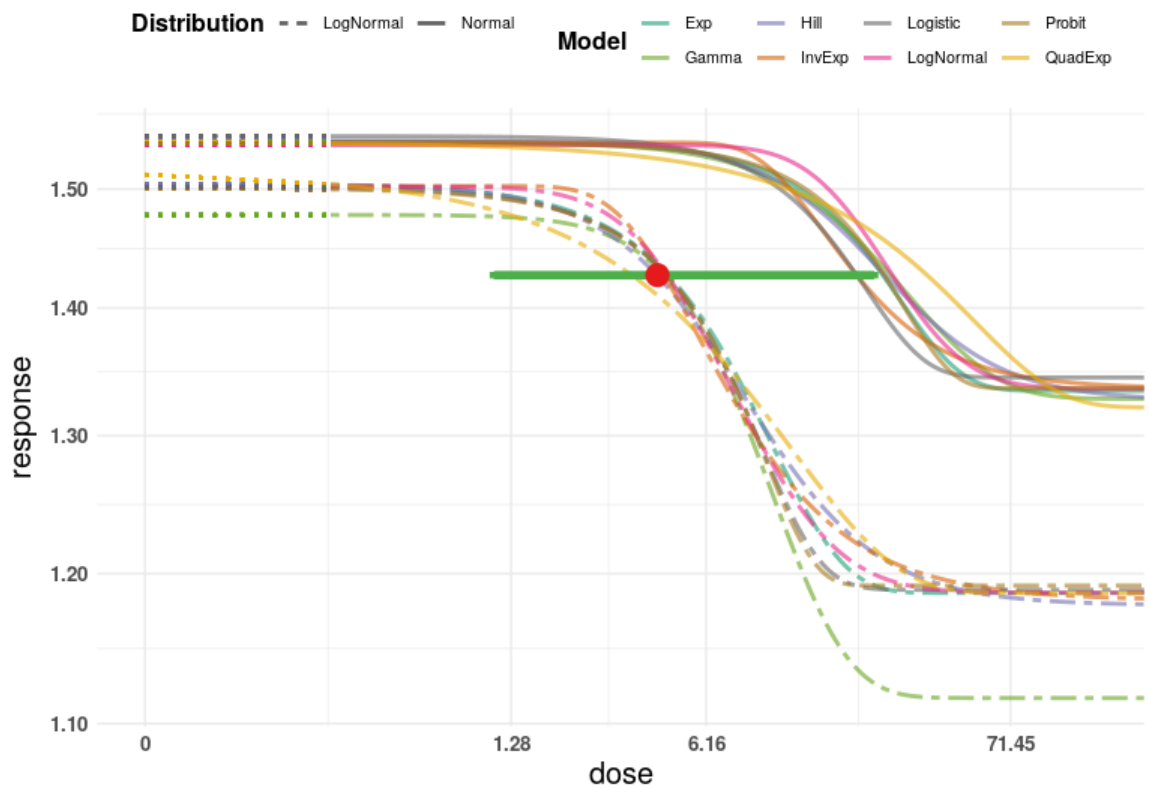

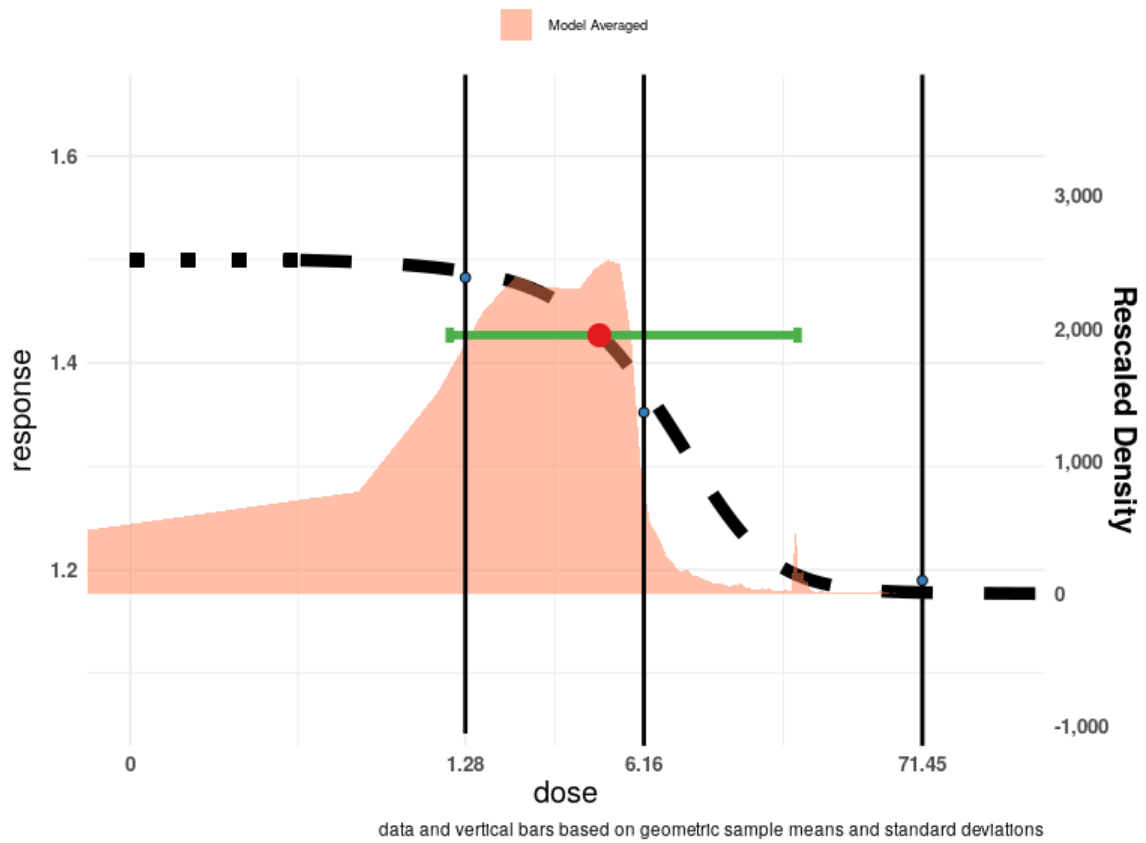



## Siddique et al. (2020) FEV6 (lung function), BMR 5%

### Data Description

The endpoint to be analyzed is: FEV6 response

Data used for analysis:

| Exposure.µg.kg.bw.per.day | Response | SD    | N   |
|---------------------------|----------|-------|-----|
| 1.28                      | 1.669    | 0.536 | 279 |
| 6.16                      | 1.547    | 0.538 | 281 |
| 71.45                     | 1.500    | 0.851 | 282 |

The 'Value for CES' is set to 0.05.

Extended dose range is not applied.

Informative background prior: min: 1.5021; the most likely: 1.669; max: 1.8359. Shape parameter is applied.

The 'Sampling Method' is set to Bridge Sampling.

### Results

*Information pertaining to this endpoint.*

The results do not fulfill the EFSA BMD guidance (EFSA Scientific Committee, 2022) recommendations since none of the candidate models fit the data sufficiently well.

#### Check for constant variance coefficient of variation

Distributional assumption of constant variance for the normal distribution is not met, Bartlett test p-value is 0

Distributional assumption of constant variance (on log-scale) are not met, Bartlett test p-value is 0

#### Check for constant variance coefficient of variation

distributional assumption of constant variance for the normal distribution is not met, Bartlett test p-value is 0.0000

distributional assumption of constant variance (on log-scale) is not met, Bartlett test p-value is 0.0000

### Goodness of Fit

None of the models provide an adequate fit do the data (Bayes factor is 4.67e+01).

### Model Averaged BMD

| Model          | Type | BMDL  | BMD   | BMDU   |
|----------------|------|-------|-------|--------|
| Model Averaged | BS   | 1.600 | 5.091 | 30.913 |

| Model          | Type | BMDL  | BMD    | BMDU   |
|----------------|------|-------|--------|--------|
| Model Averaged | BS   | 1.829 | 8.088  | 64.527 |
| Model Averaged | BS   | 2.842 | 36.619 | 68.215 |
| Model Averaged | BS   | 1.525 | 4.400  | 10.449 |
| Model Averaged | BS   | 1.662 | 6.403  | 45.149 |

**Estimated BMDs per model**

| Model  | BMDL  | BMD    | BMDU   | Model Weights | Converged |
|--------|-------|--------|--------|---------------|-----------|
| E4_N   | 2.115 | 25.229 | 67.076 | 0.000         | 1         |
| IE4_N  | 1.855 | 14.460 | 66.995 | 0.000         | 1         |
| H4_N   | 2.081 | 22.610 | 66.904 | 0.000         | 0         |
| LN4_N  | 2.114 | 20.174 | 67.273 | 0.000         | 1         |
| G4_N   | 2.509 | 32.442 | 68.355 | 0.000         | 0         |
| QE4_N  | 2.360 | 31.756 | 66.370 | 0.000         | 1         |
| P4_N   | 2.105 | 19.371 | 66.272 | 0.000         | 1         |
| L4_N   | 2.312 | 23.713 | 67.197 | 0.000         | 1         |
| E4_LN  | 1.707 | 5.326  | 35.255 | 0.111         | 1         |
| IE4_LN | 1.696 | 5.204  | 42.489 | 0.103         | 1         |
| H4_LN  | 1.453 | 4.924  | 29.124 | 0.117         | 1         |
| LN4_LN | 1.643 | 5.298  | 35.999 | 0.106         | 1         |
| G4_LN  | 1.664 | 4.829  | 27.794 | 0.138         | 1         |
| QE4_LN | 1.495 | 4.263  | 21.436 | 0.215         | 1         |
| P4_LN  | 1.780 | 5.400  | 37.838 | 0.106         | 1         |
| L4_LN  | 1.723 | 5.331  | 35.362 | 0.104         | 1         |

**Plots of Fitted Models**

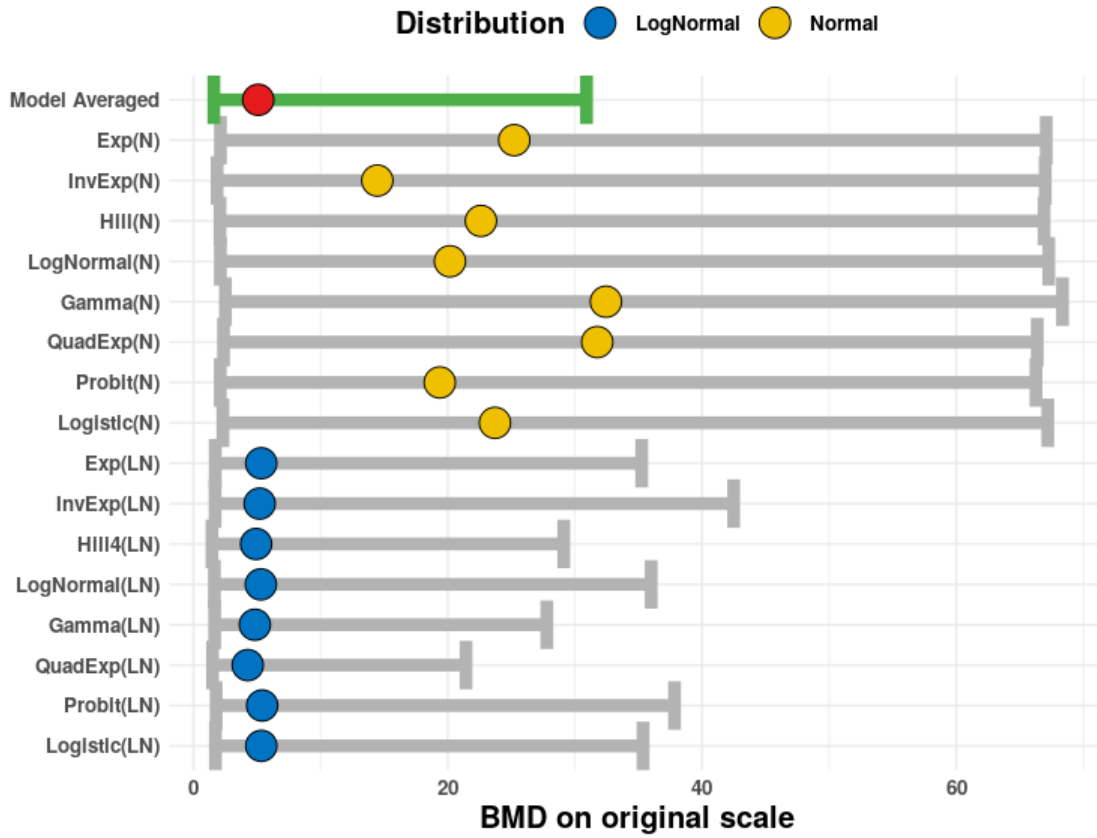

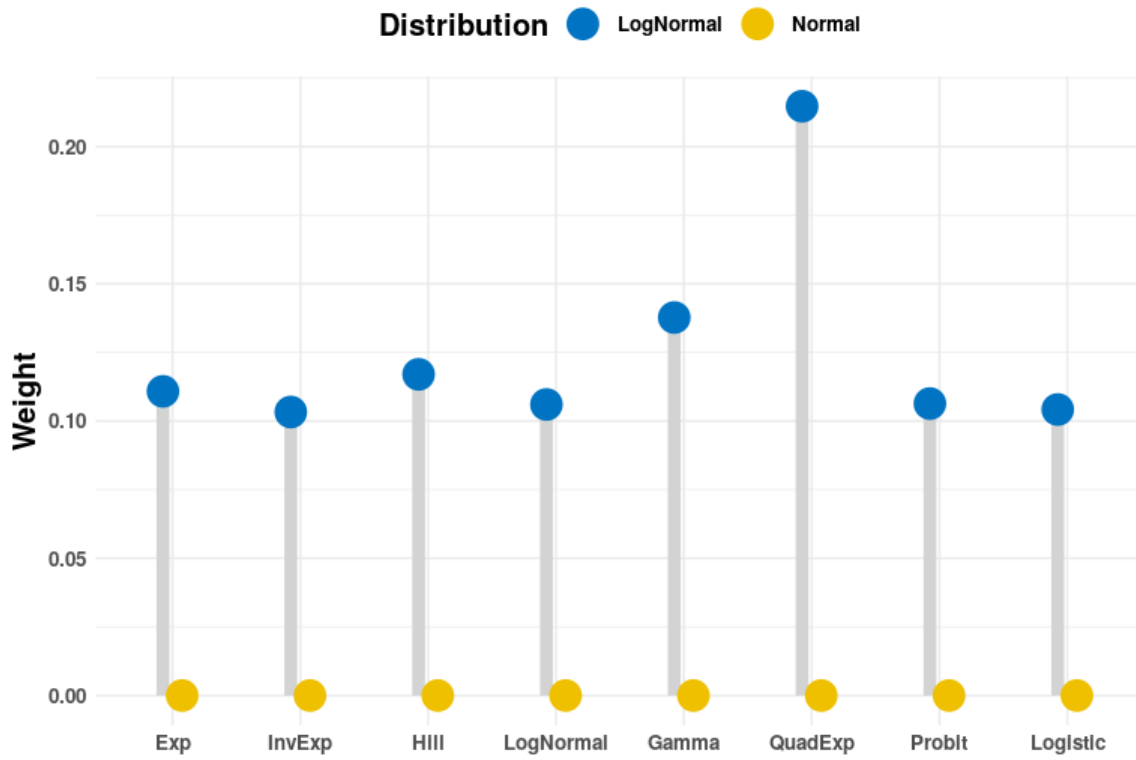

### Normal distribution

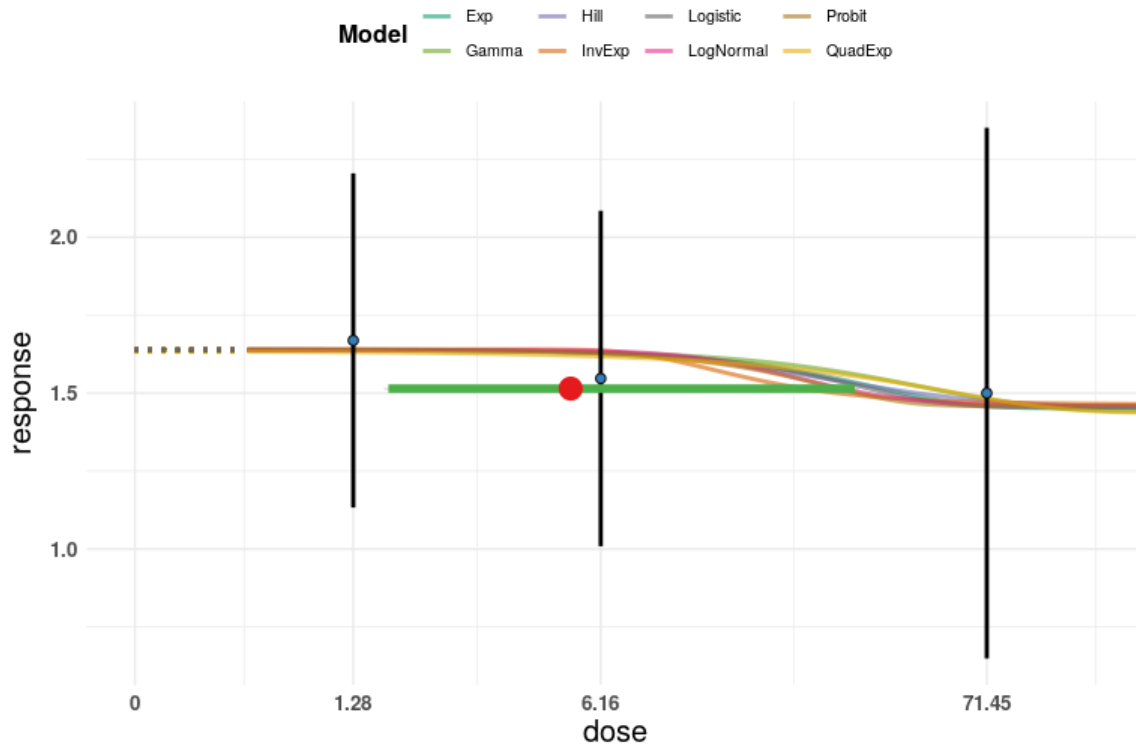

### LogNormal distribution

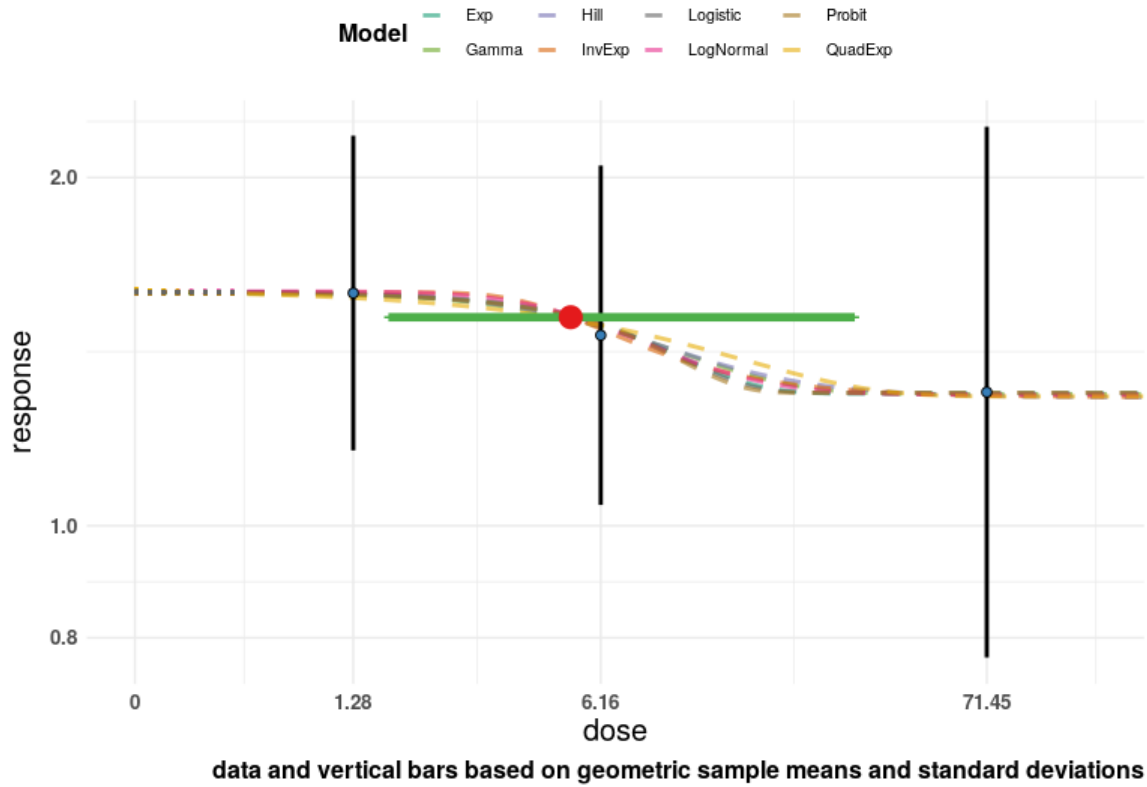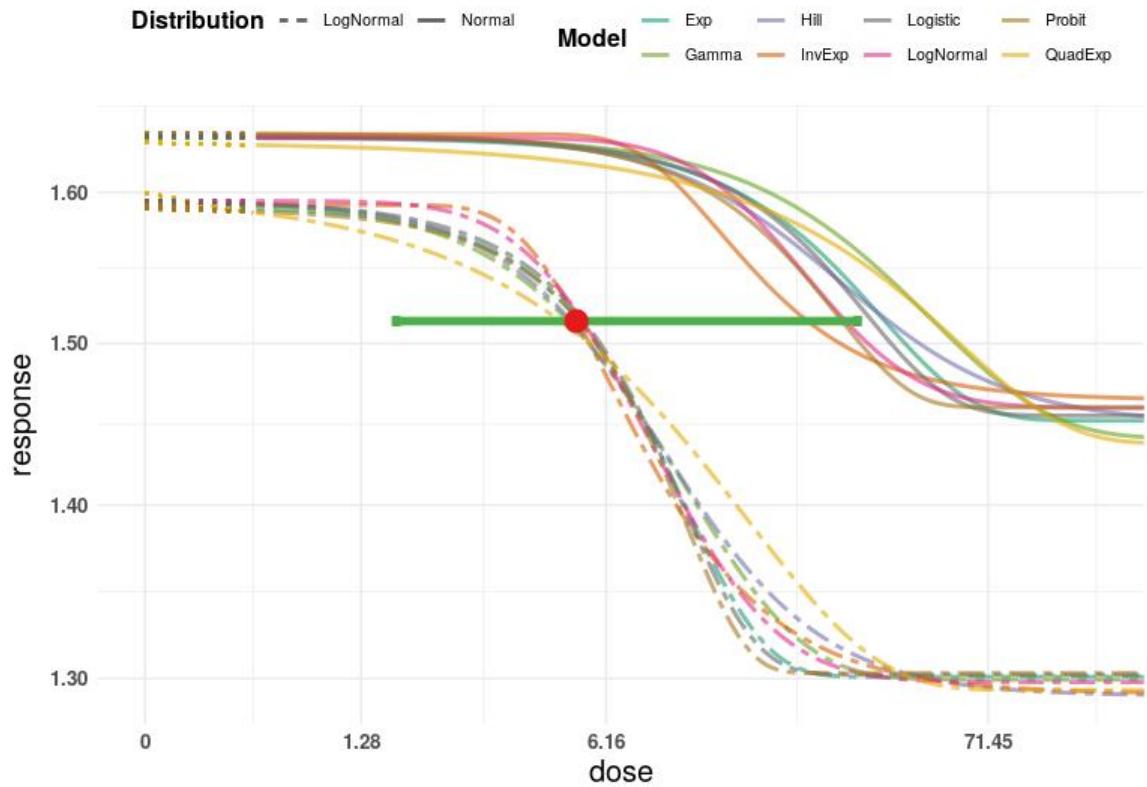

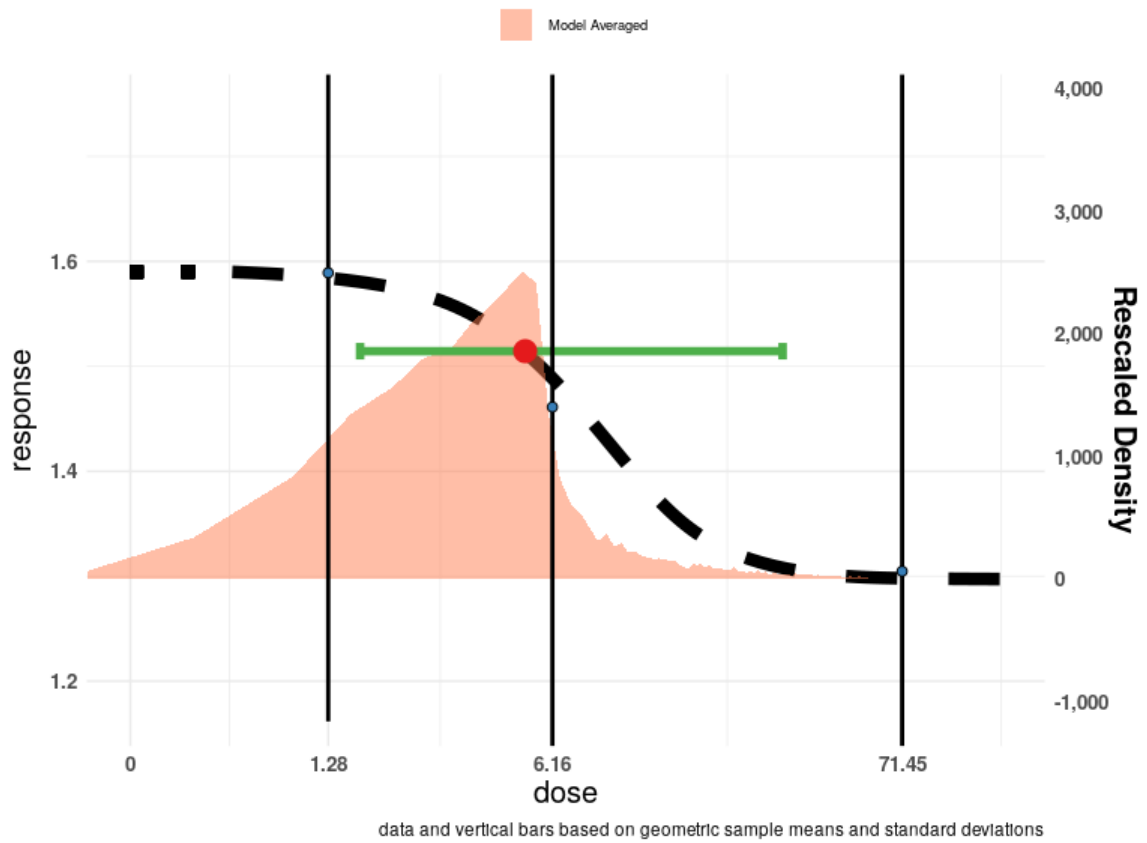

## Siddique et al. (2020) obstruction (lung function), relative BMR 5%

### Data Description

The endpoint to be analyzed is: Adj.cases for obstruction

Data used for analysis:

| Exposure.µg.kg.bw.per.day | Adj.cases | N   |
|---------------------------|-----------|-----|
| 1.28                      | 16        | 279 |
| 6.16                      | 30        | 281 |
| 71.45                     | 52        | 282 |

The 'Value for CES' is set to 0.003041825.

Extended dose range is not applied.

Informative background prior: min: 0.056774194; the most likely: 0.05734767; max: 0.057921147. Shape parameter is applied.

The 'Sampling Method' is set to Bridge Sampling.

### Results

*Information pertaining to this endpoint.*

The results do not fulfill the EFSA BMD guidance (2022) recommendations since none of the candidate models fit the data sufficiently well and BMDU/BMDL > 50.

### Goodness of Fit

None of the models provide an adequate fit do the data (Bayes factor is 2.78e+01).

### Model Averaged BMD

| Model          | Type | BMDL  | BMD   | BMDU   |
|----------------|------|-------|-------|--------|
| Model Averaged | BS   | 0.327 | 5.908 | 44.394 |

### Estimated BMDs per model

| Model | BMDL  | BMD    | BMDU   | Model Weights | Converged |
|-------|-------|--------|--------|---------------|-----------|
| E4_Q  | 0.157 | 4.632  | 33.194 | 0.113         | 1         |
| IE4_Q | 0.736 | 31.510 | 56.598 | 0.122         | 0         |
| H4_Q  | 0.167 | 6.230  | 40.009 | 0.124         | 1         |
| LN4_Q | 0.429 | 21.199 | 47.763 | 0.122         | 0         |
| G4_Q  | 0.253 | 9.591  | 37.659 | 0.143         | 1         |
| QE4_Q | 1.291 | 2.204  | 5.925  | 0.220         | 1         |
| P4_Q  | 0.283 | 12.123 | 40.928 | 0.080         | 0         |
| L4_Q  | 0.267 | 14.132 | 46.164 | 0.076         | 0         |



**Plots of Fitted Models**

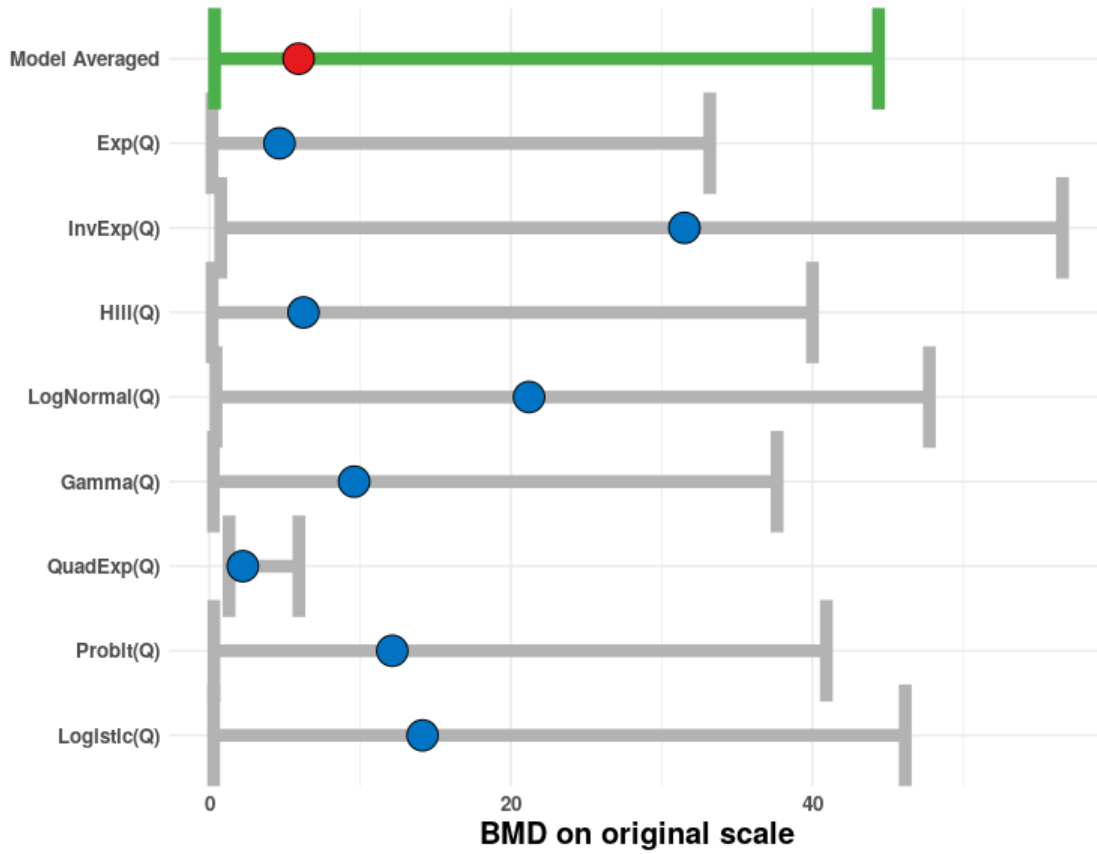

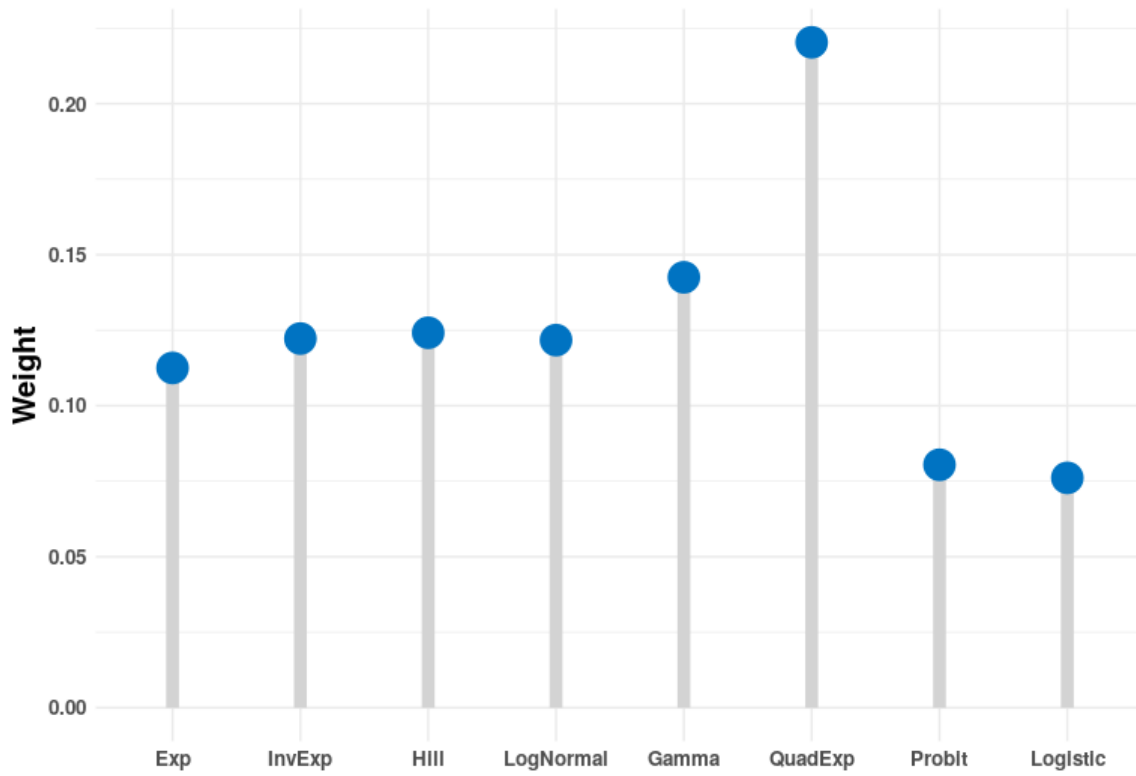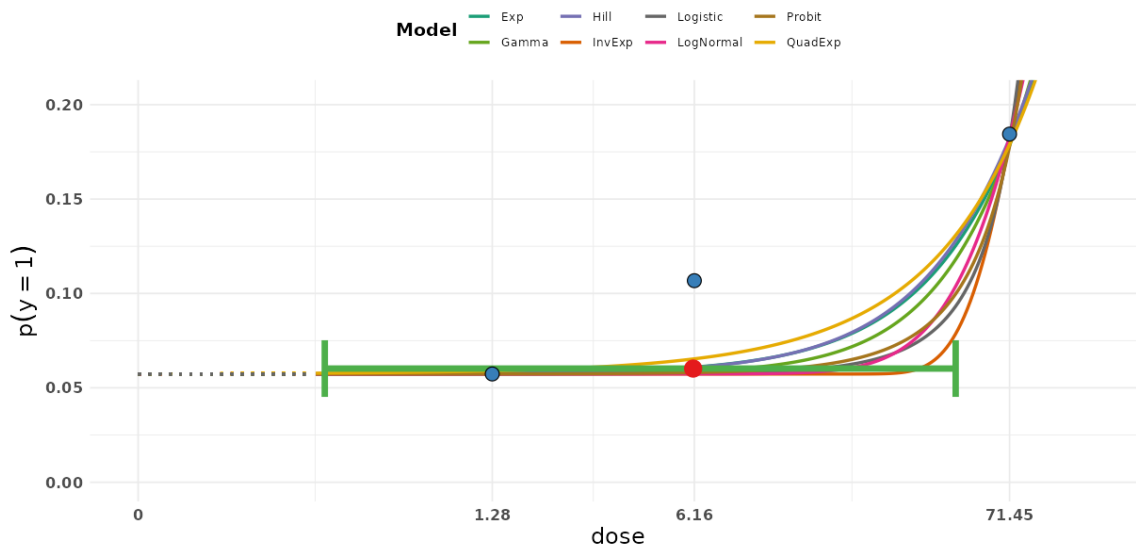

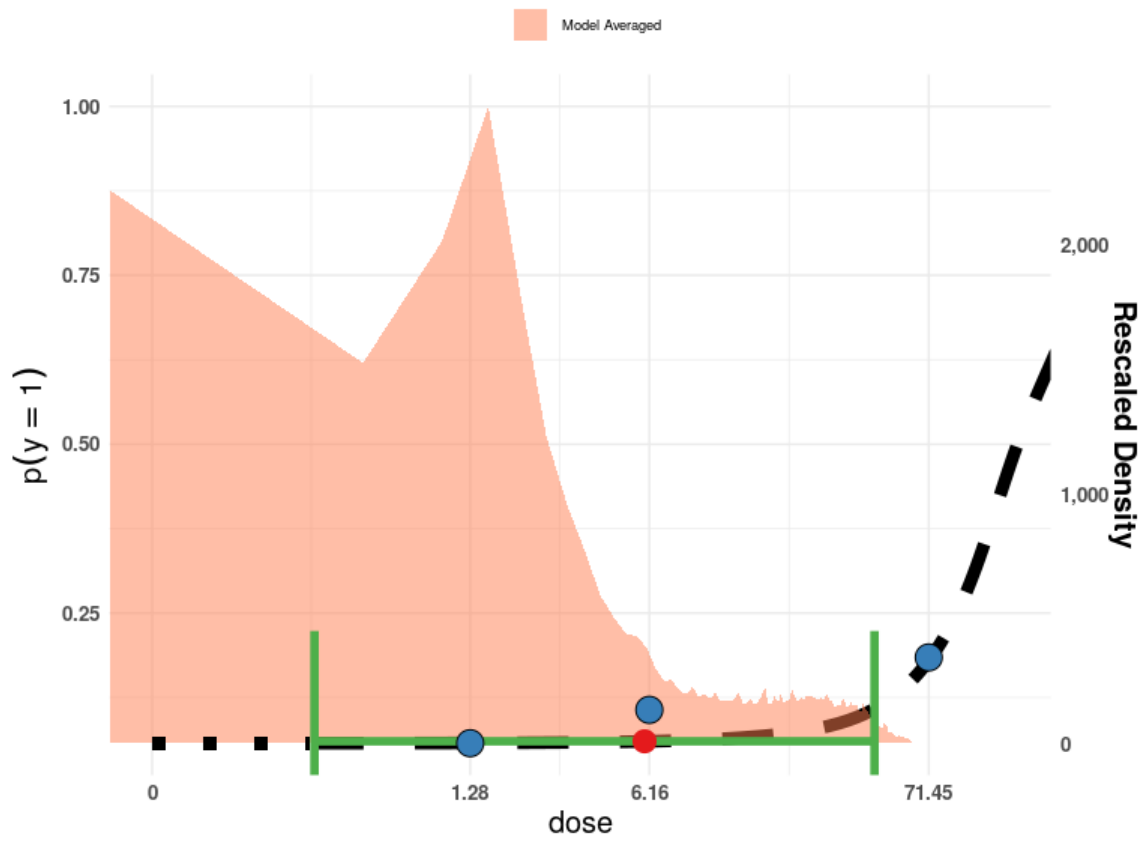

## Siddique et al. (2020) reversible obstruction (lung function), relative BMR 5%

### Data Description

The endpoint to be analyzed is: Adj.cases for reversible obstruction

Data used for analysis:

| Exposure.µg.kg.bw.per.day | Adj.cases | N   |
|---------------------------|-----------|-----|
| 1.28                      | 11        | 279 |
| 6.16                      | 19        | 281 |
| 71.45                     | 39        | 282 |

The 'Value for CES' is set to 0.002052239.

Extended dose range is not applied.

Informative background prior: min: 0.039032258; the most likely: 0.039426523; max: 0.039820789. Shape parameter is applied.

The 'Sampling Method' is set to Bridge Sampling.

### Results

*Information pertaining to this endpoint.*

The results do not fulfill the EFSA BMD guidance (EFSA Scientific Committee, 2022) recommendations since none of the candidate models fit the data sufficiently well.

### Goodness of Fit

None of the models provide an adequate fit do the data (Bayes factor is 1.14e+01).

### Model Averaged BMD

| Model          | Type | BMDL  | BMD   | BMDU   |
|----------------|------|-------|-------|--------|
| Model Averaged | BS   | 1.287 | 21.31 | 53.526 |

### Estimated BMDs per model

| Model | BMDL  | BMD    | BMDU   | Model Weights | Converged |
|-------|-------|--------|--------|---------------|-----------|
| E4_Q  | 0.817 | 17.090 | 43.884 | 0.110         | 1         |
| IE4_Q | 4.452 | 38.492 | 57.576 | 0.143         | 1         |
| H4_Q  | 0.828 | 22.834 | 50.105 | 0.129         | 0         |
| LN4_Q | 3.201 | 33.752 | 54.515 | 0.154         | 1         |
| G4_Q  | 1.199 | 16.916 | 38.509 | 0.134         | 1         |
| QE4_Q | 1.204 | 2.384  | 6.430  | 0.137         | 1         |
| P4_Q  | 0.947 | 19.674 | 45.596 | 0.077         | 1         |
| L4_Q  | 1.971 | 29.357 | 56.652 | 0.116         | 0         |

**Plots of Fitted Models**

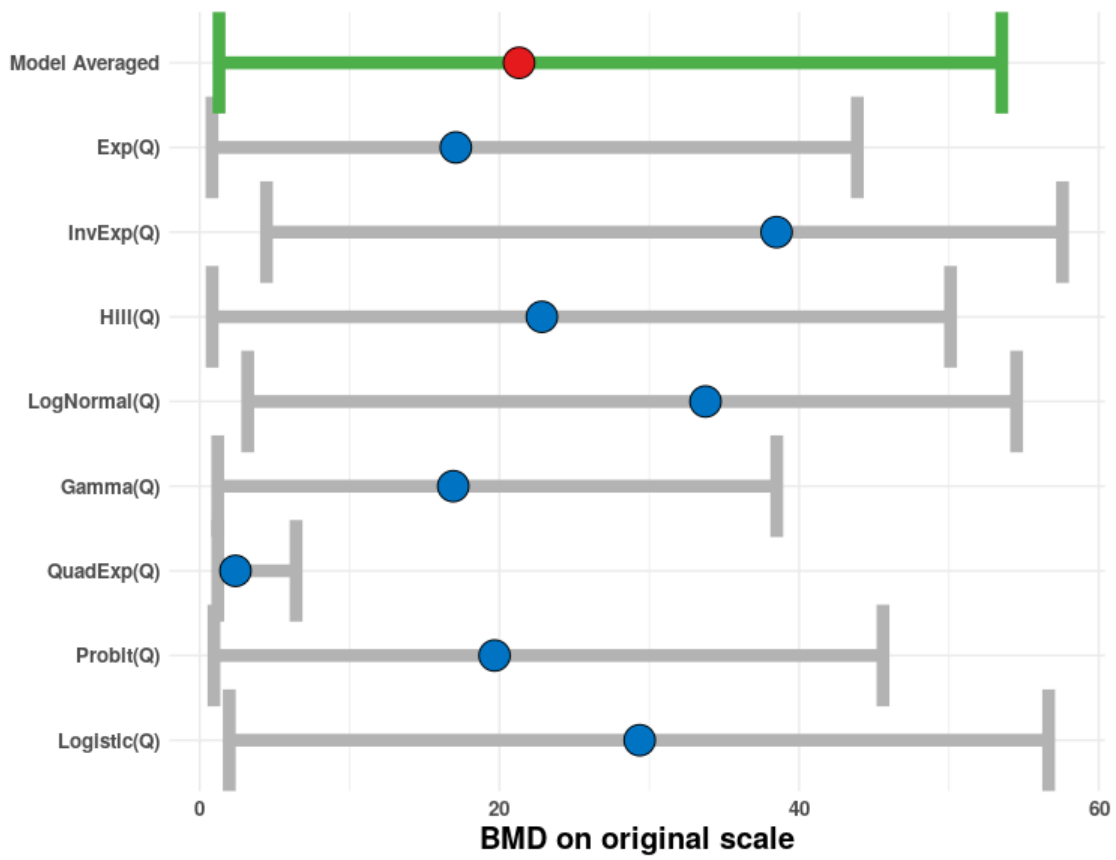

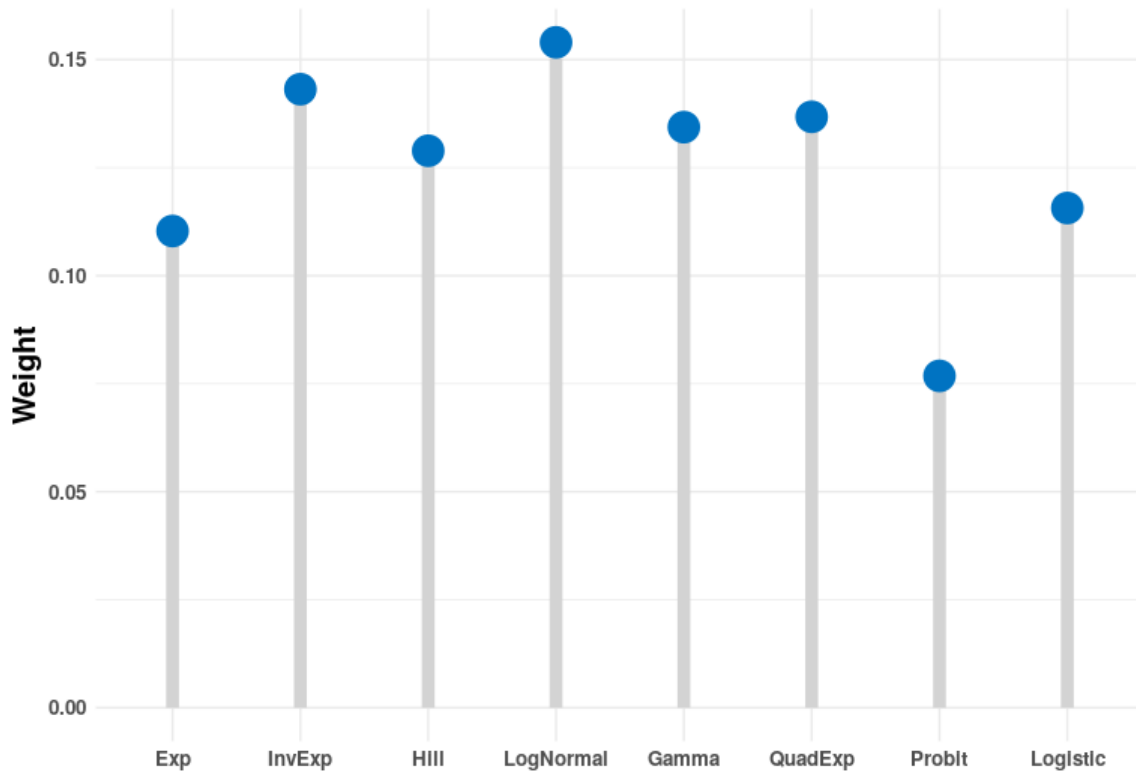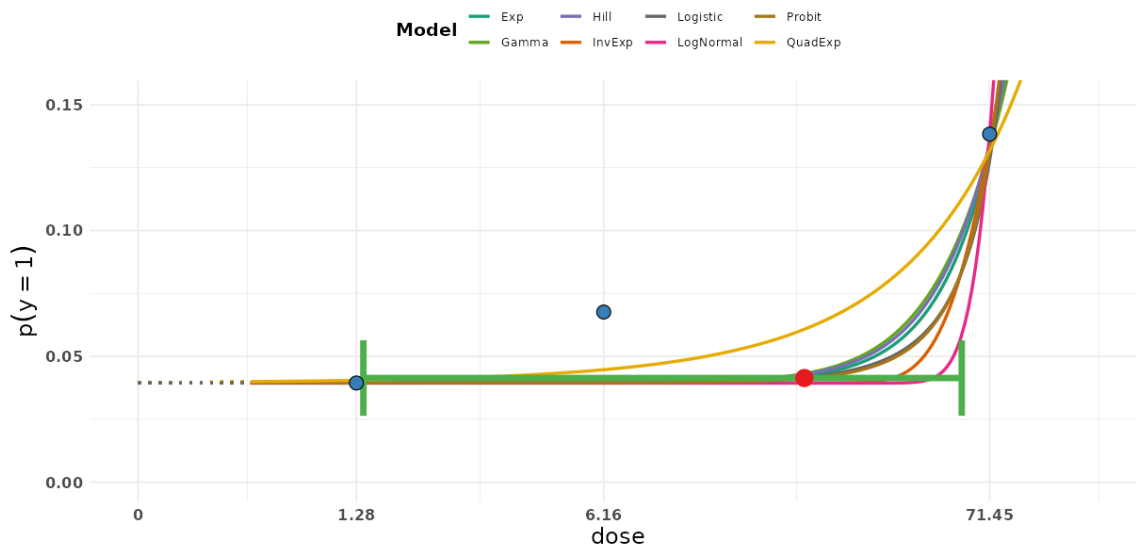

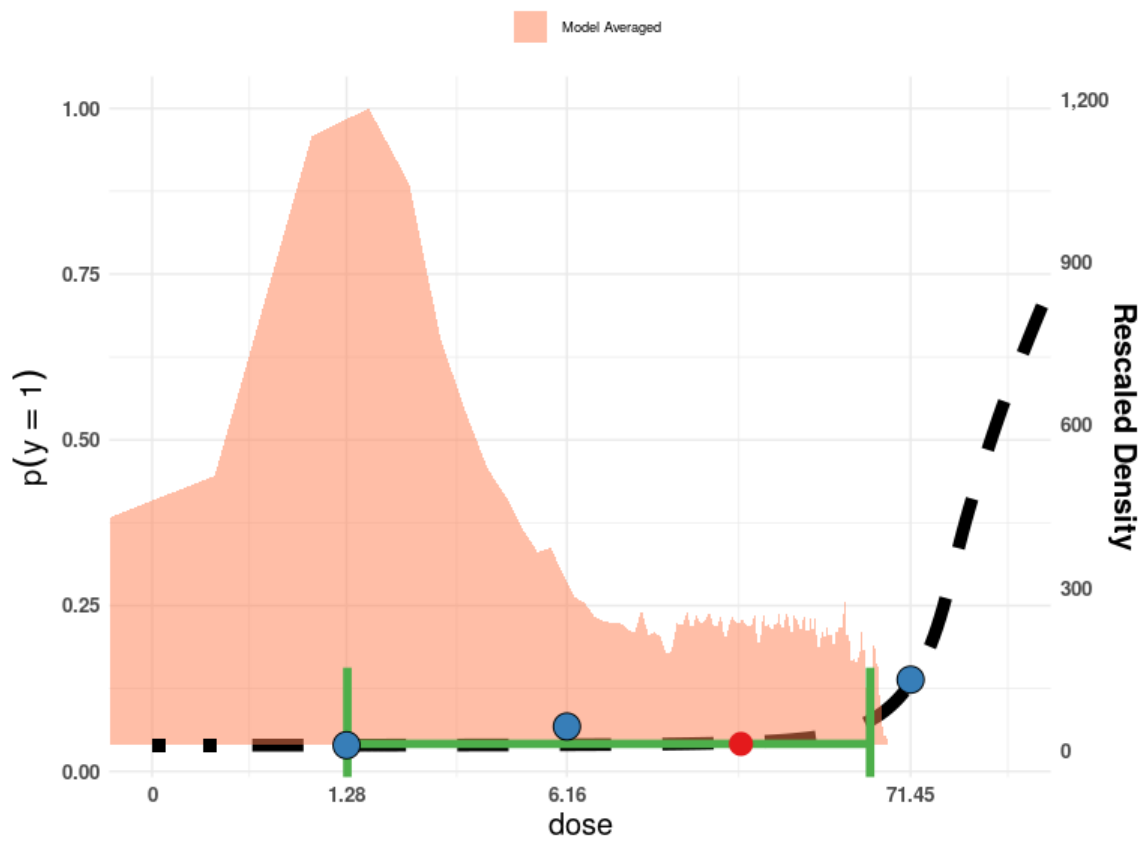

## Steinmaus et al. (2013) bladder cancer, relative BMR 5%

**Exposure: lifetime average, all years, based on arsenic water concentrations and water intake of 1.9L (included only in the uncertainty analysis)**

### Data Description

The endpoint to be analyzed is: Adj.cases. for bladder cancer

Data used for analysis:

| Exposure.µg.kg.bw.per.day | Adj.cases | N      |
|---------------------------|-----------|--------|
| 0.64                      | 34        | 142031 |
| 1.71                      | 29        | 132891 |
| 4.05                      | 62        | 99844  |
| 5.63                      | 107       | 75234  |

The 'Value for CES' is set to 1.197e-05.

Extended dose range is applied.

Informative background prior: min: 0.00022742; the most likely: 0.00023938; max: 0.00025135. Shape parameter is applied.

The 'Sampling Method' is set to Bridge Sampling.

### Results

*Information pertaining to this endpoint.*

#### Goodness of Fit

Best fitting model fits sufficiently well (Bayes factor is 2.38e-03).

#### Model Averaged BMD

| Model          | Type | BMDL  | BMD   | BMDU  |
|----------------|------|-------|-------|-------|
| Model Averaged | BS   | 0.922 | 1.605 | 2.254 |

#### Estimated BMDs per model

| Model | BMDL  | BMD   | BMDU  | Model Weights | Converged |
|-------|-------|-------|-------|---------------|-----------|
| E4_Q  | 1.037 | 1.569 | 2.116 | 0.256         | 1         |
| IE4_Q | 1.449 | 2.015 | 2.525 | 0.097         | 1         |
| H4_Q  | 1.068 | 1.583 | 2.125 | 0.251         | 1         |
| LN4_Q | 1.306 | 1.821 | 2.337 | 0.221         | 1         |
| G4_Q  | 1.137 | 1.851 | 6.988 | 0.000         | 0         |
| QE4_Q | 0.241 | 0.394 | 0.539 | 0.000         | 1         |
| P4_Q  | 0.695 | 1.148 | 1.720 | 0.092         | 1         |
| L4_Q  | 0.676 | 1.136 | 1.700 | 0.083         | 1         |



Plots of Fitted Models

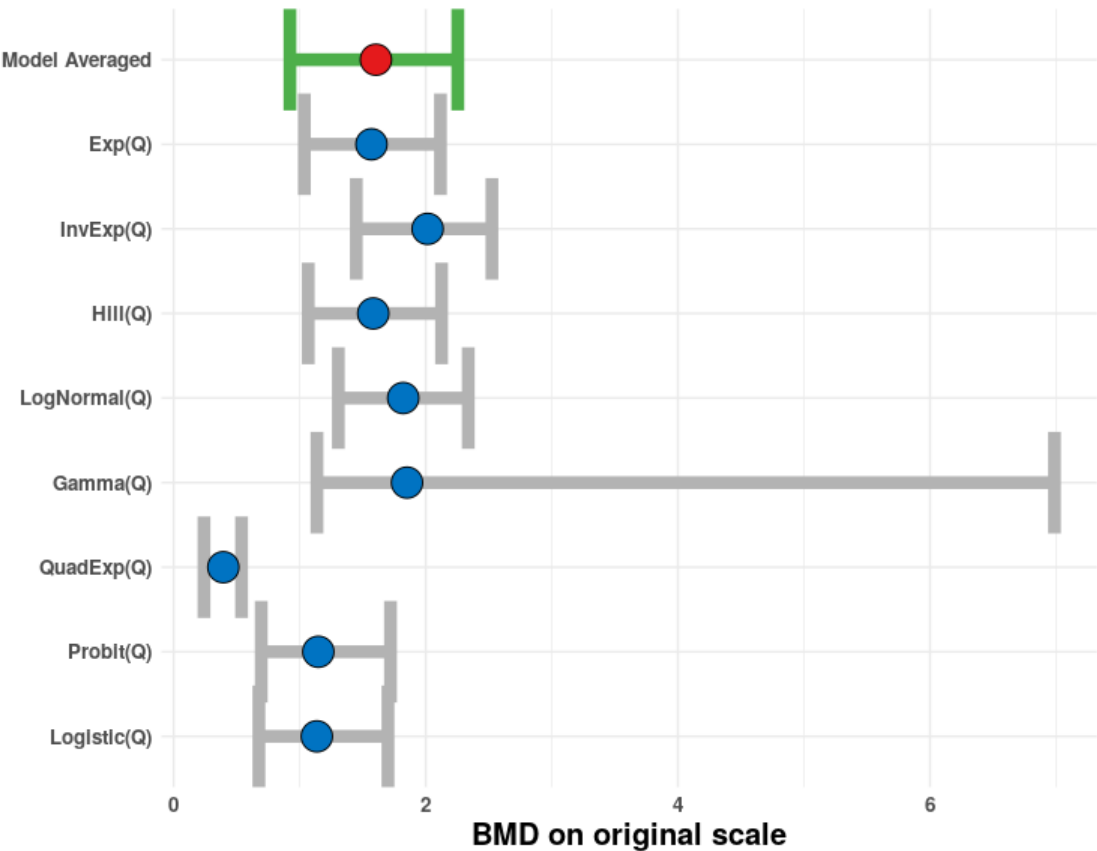

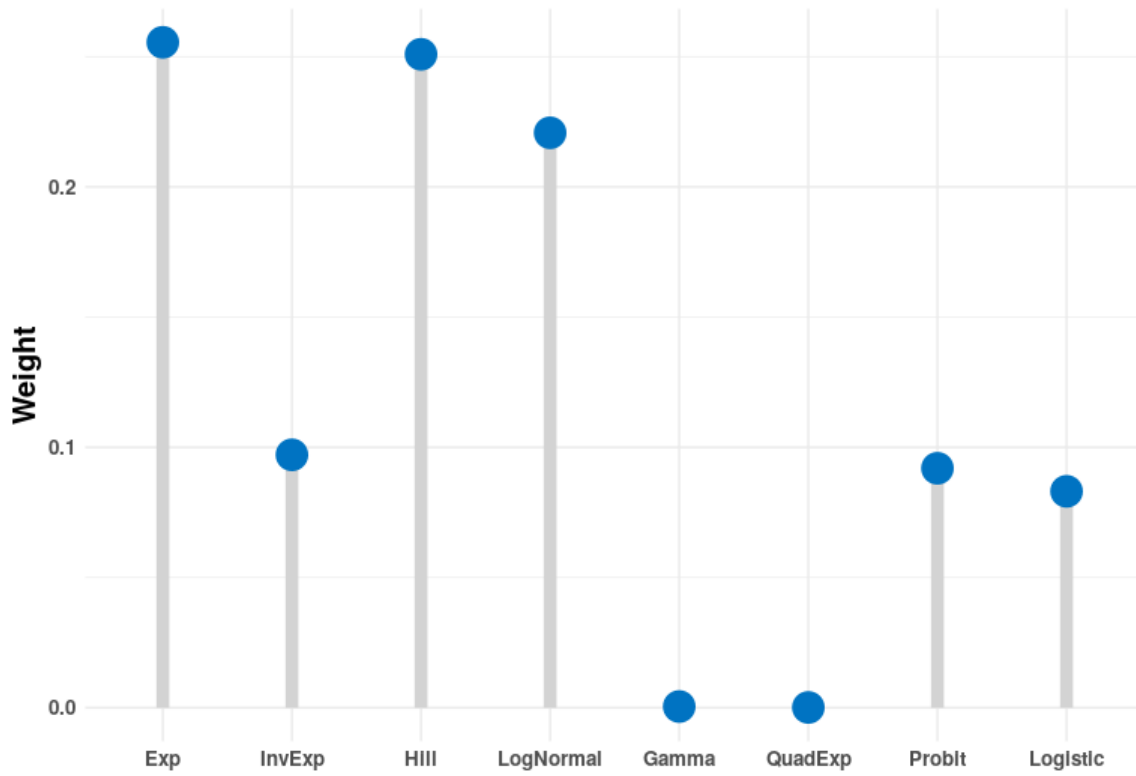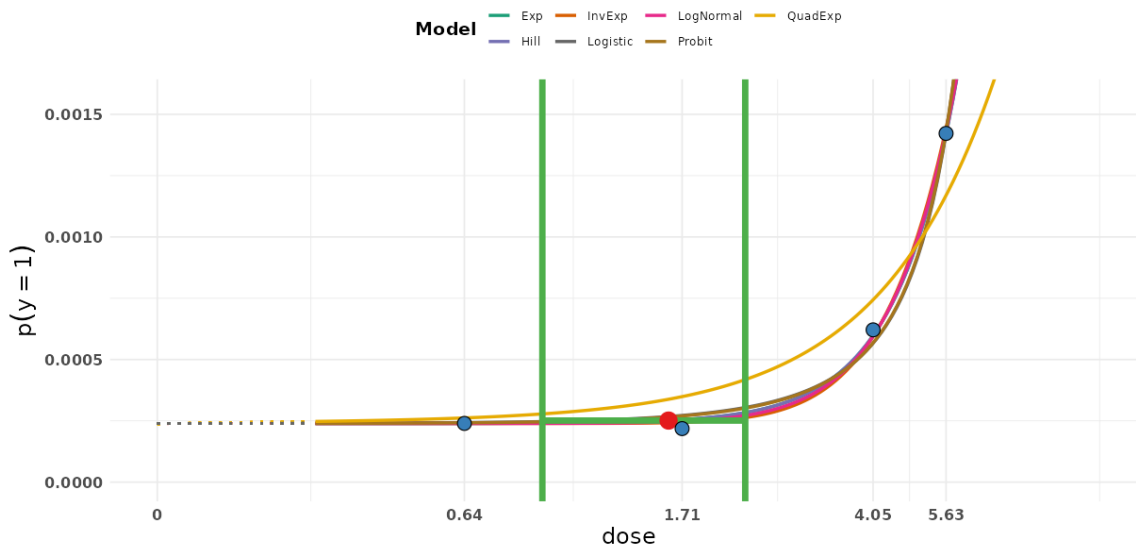

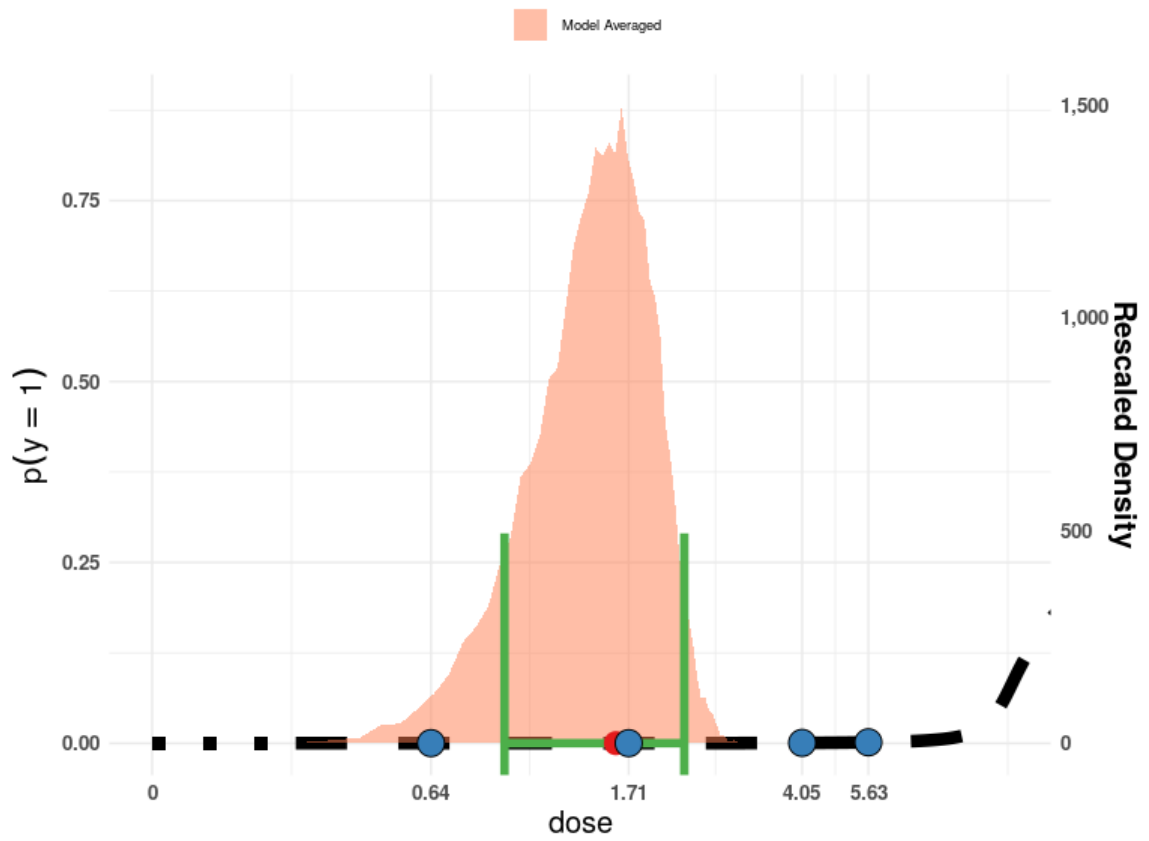

## Steinmaus et al. (2013) bladder cancer, relative BMR 5%

**Exposure: lifetime average, all years, based on arsenic daily intakes (the preferred exposure estimate for the study)**

### Data Description

The endpoint to be analyzed is: Adj.cases for bladder cancer

Data used for analysis:

| Exposure.µg.kg.bw.per.day | Adj.cases | N      |
|---------------------------|-----------|--------|
| 0.58                      | 32        | 138516 |
| 1.55                      | 34        | 136406 |
| 3.46                      | 76        | 108281 |
| 4.67                      | 90        | 66797  |

The 'Value for CES' is set to 1.155e-05.

Extended dose range is applied.

Informative background prior: min: 0.00022871; the most likely: 0.00023102; max: 0.00023333. Shape parameter is applied.

The 'Sampling Method' is set to Bridge Sampling.

### Results

*Information pertaining to this endpoint.*

#### Goodness of Fit

Best fitting model fits sufficiently well (Bayes factor is 1.70e-03).

#### Model Averaged BMD

| Model          | Type | BMDL | BMD   | BMDU  |
|----------------|------|------|-------|-------|
| Model Averaged | BS   | 0.57 | 1.092 | 1.636 |

#### Estimated BMDs per model

| Model | BMDL  | BMD   | BMDU  | Model Weights | Converged |
|-------|-------|-------|-------|---------------|-----------|
| E4_Q  | 0.669 | 1.079 | 1.515 | 0.281         | 1         |
| IE4_Q | 0.960 | 1.433 | 1.886 | 0.082         | 1         |
| H4_Q  | 0.669 | 1.082 | 1.500 | 0.276         | 1         |
| LN4_Q | 0.829 | 1.276 | 1.747 | 0.203         | 1         |
| G4_Q  | 0.889 | 3.682 | 5.903 | 0.000         | 0         |
| QE4_Q | 0.178 | 0.304 | 0.434 | 0.002         | 1         |
| P4_Q  | 0.419 | 0.733 | 1.143 | 0.084         | 1         |
| L4_Q  | 0.382 | 0.686 | 1.108 | 0.072         | 1         |

**Plots of Fitted Models**

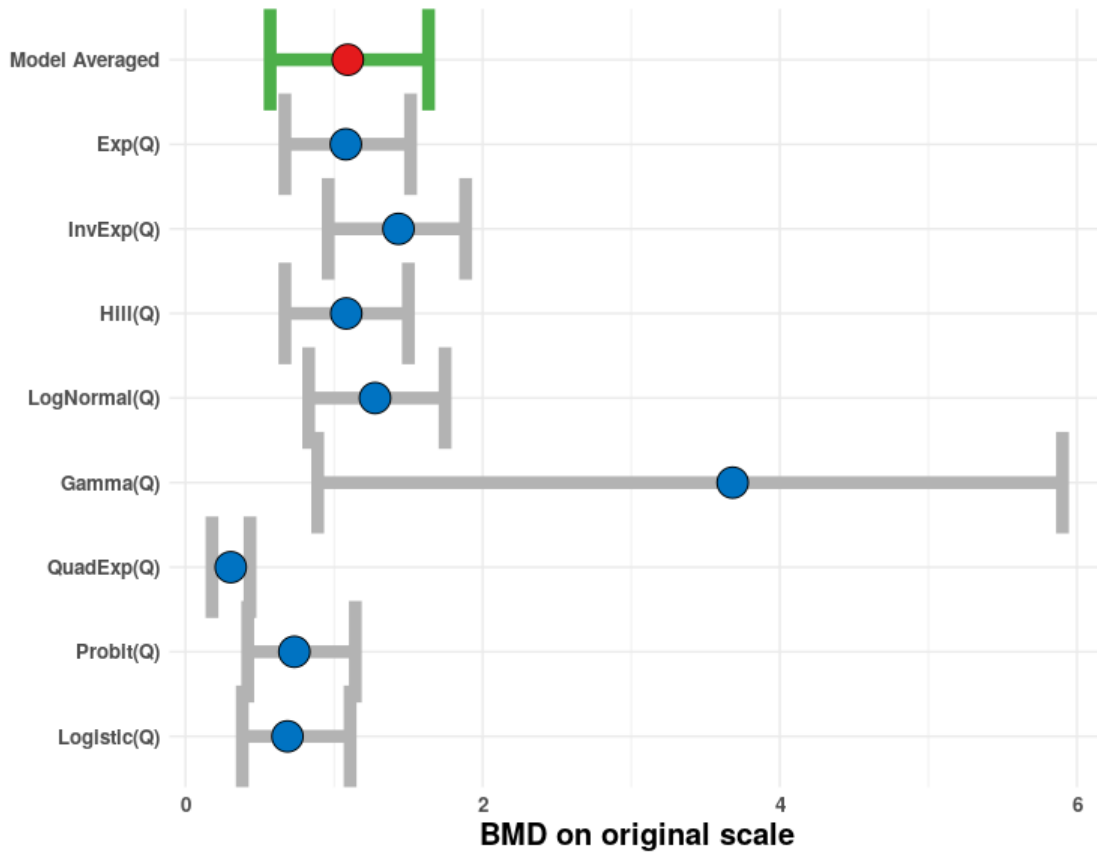

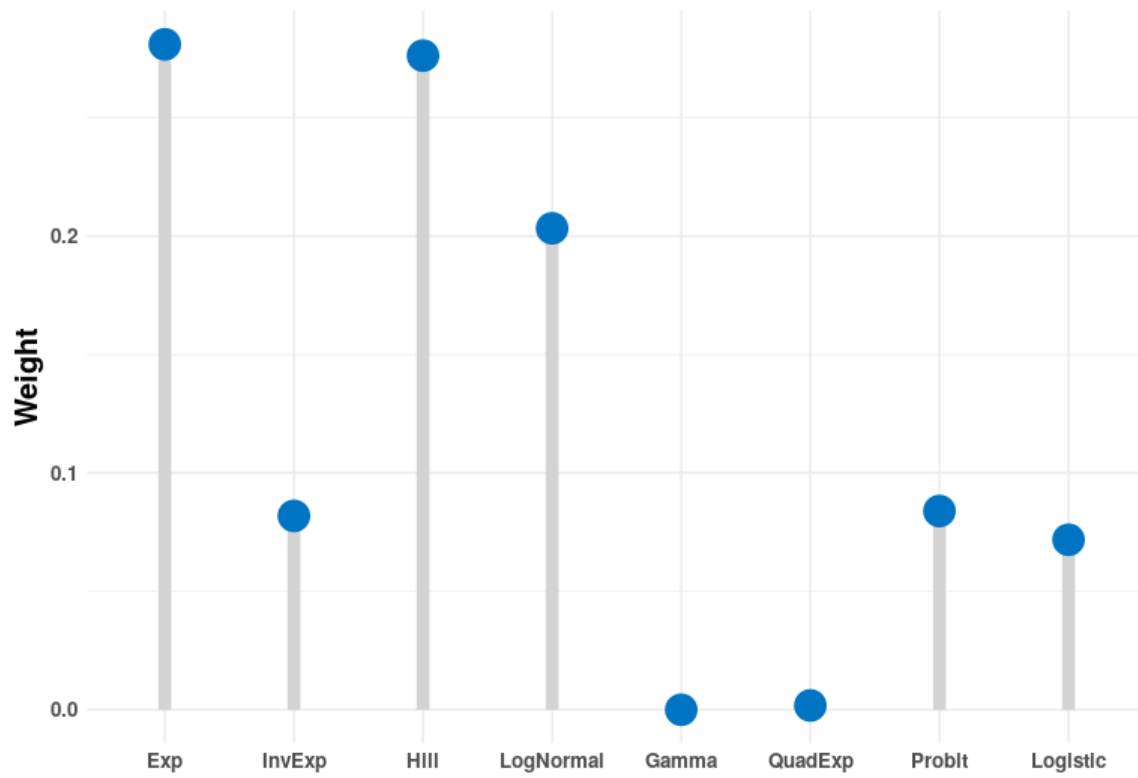

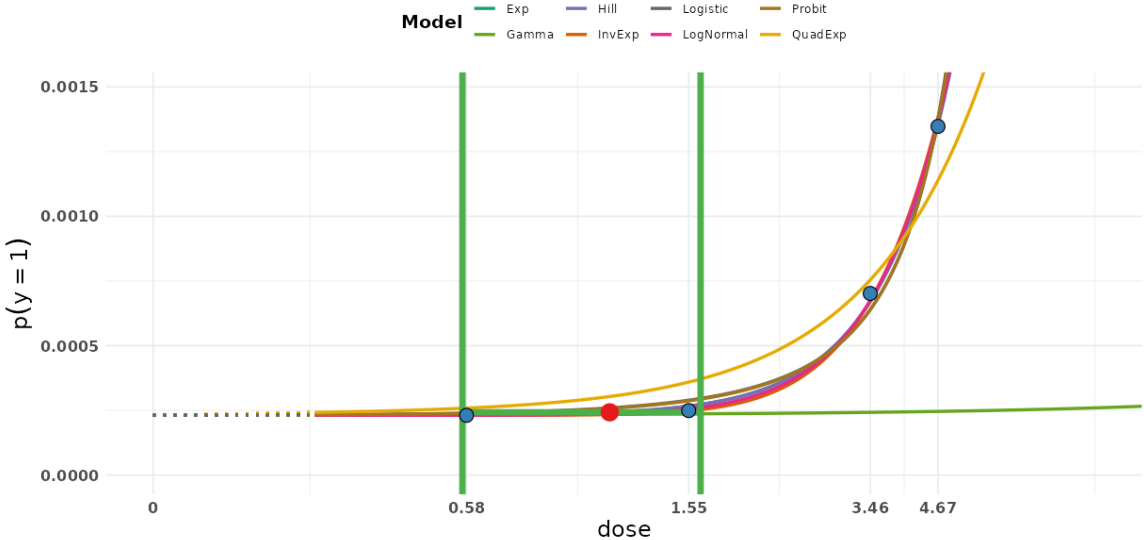

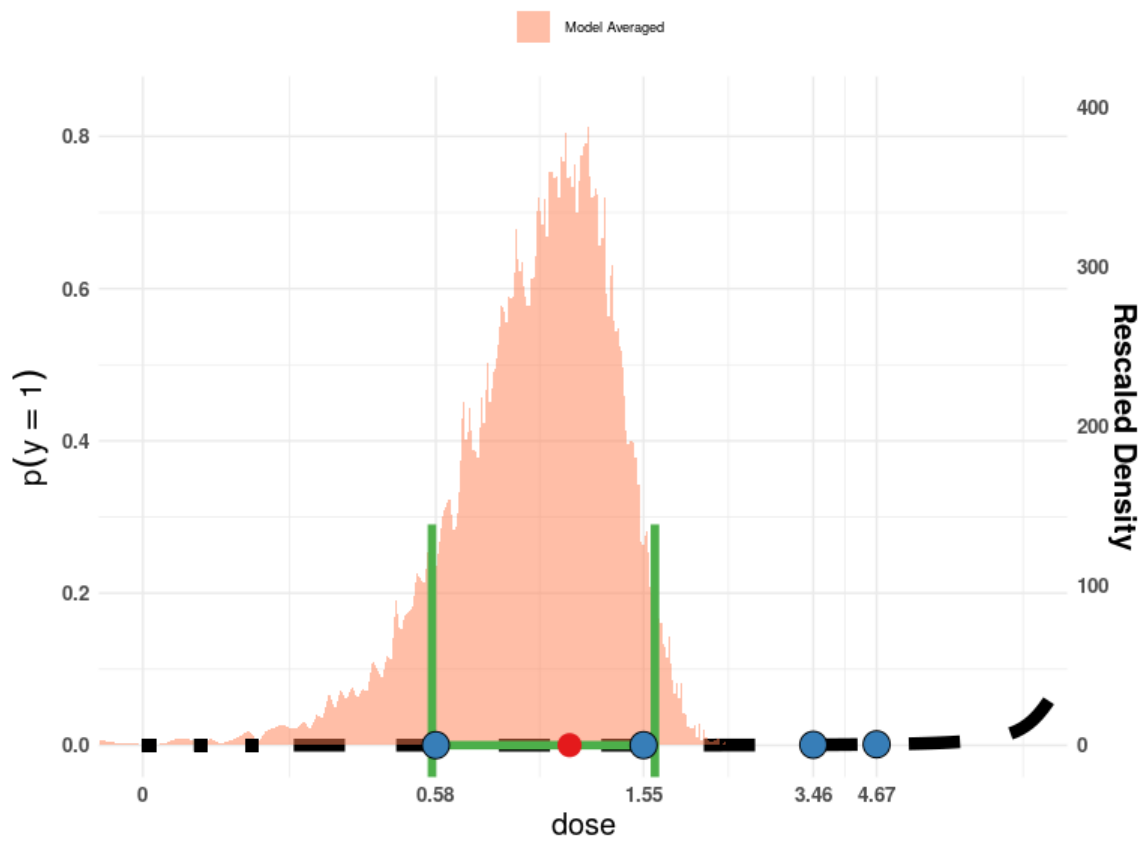



## Steinmaus et al. (2013) bladder cancer, relative BMR 5%

**Exposure: lifetime average, all years, based on arsenic daily intakes**  
**Sensitivity analysis: the highest exposure point estimate doubled**

### Data Description

The endpoint to be analyzed is: Adj.cases for bladder cancer

Data used for analysis:

| Exposure.µg.kg.bw.per.day | Adj.cases | N      |
|---------------------------|-----------|--------|
| 0.58                      | 32        | 138516 |
| 1.55                      | 34        | 136406 |
| 3.46                      | 76        | 108281 |
| 9.06                      | 90        | 66797  |

The 'Value for CES' is set to 1.155e-05.

Extended dose range is applied.

Informative background prior: min: 0.00022871; the most likely: 0.00023102; max: 0.00023333. Shape parameter is applied.

The 'Sampling Method' is set to Bridge Sampling.

### Results

*Information pertaining to this endpoint.*

### Goodness of Fit

Best fitting model fits sufficiently well (Bayes factor is 2.81e-01).

### Model Averaged BMD

| Model          | Type | BMDL  | BMD   | BMDU  |
|----------------|------|-------|-------|-------|
| Model Averaged | BS   | 0.117 | 0.258 | 0.571 |

### Estimated BMDs per model

| Model | BMDL   | BMD    | BMDU   | Model Weights | Converged |
|-------|--------|--------|--------|---------------|-----------|
| E4_Q  | 0.168  | 0.334  | 0.589  | 0.229         | 1         |
| IE4_Q | 0.341  | 0.665  | 32.231 | 0.001         | 0         |
| H4_Q  | 0.167  | 0.330  | 0.587  | 0.230         | 1         |
| LN4_Q | 0.241  | 0.447  | 0.741  | 0.099         | 1         |
| G4_Q  | 75.714 | 79.830 | 82.079 | 0.000         | 0         |
| QE4_Q | 0.109  | 0.173  | 0.333  | 0.420         | 1         |
| P4_Q  | 0.064  | 0.162  | 0.372  | 0.012         | 1         |
| L4_Q  | 0.057  | 0.149  | 0.342  | 0.009         | 1         |

### Plots of Fitted Models

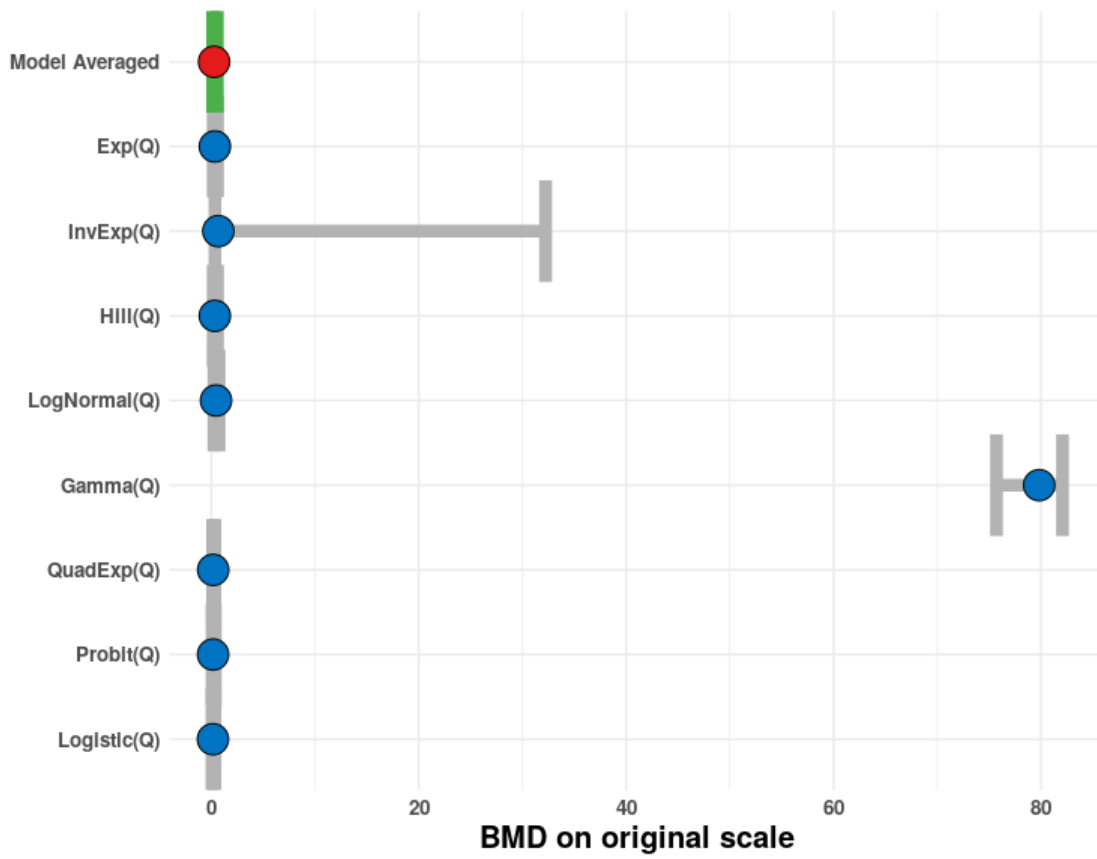

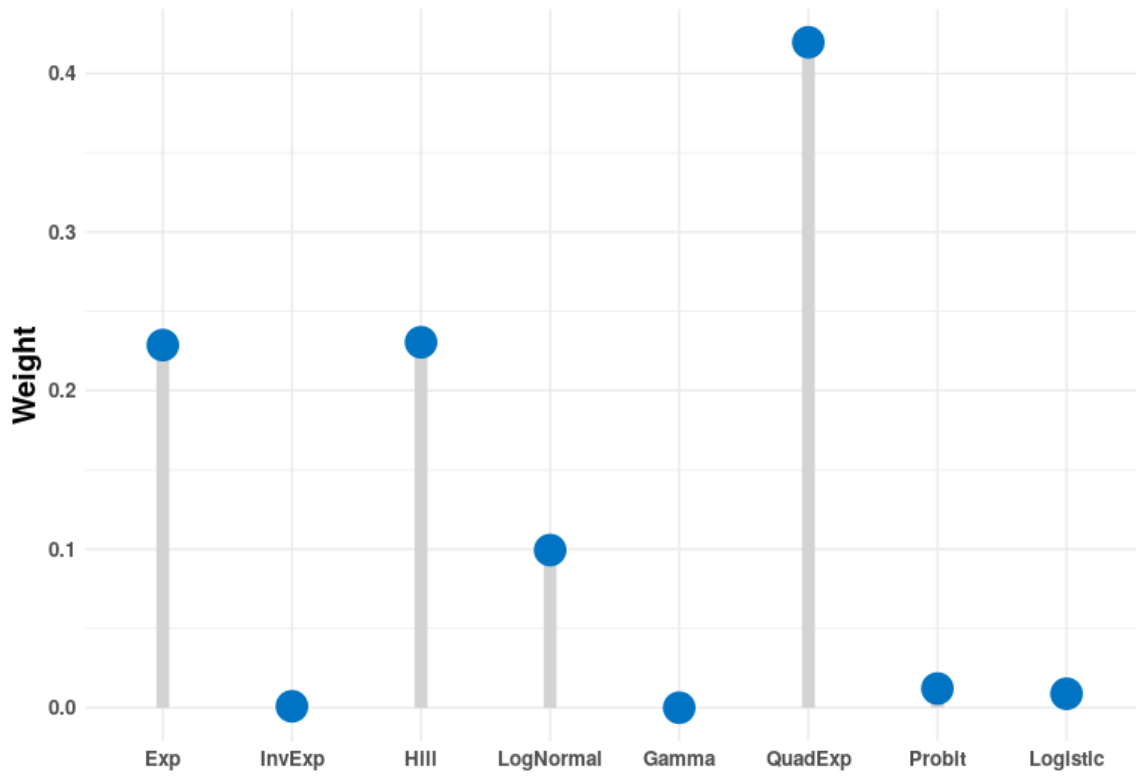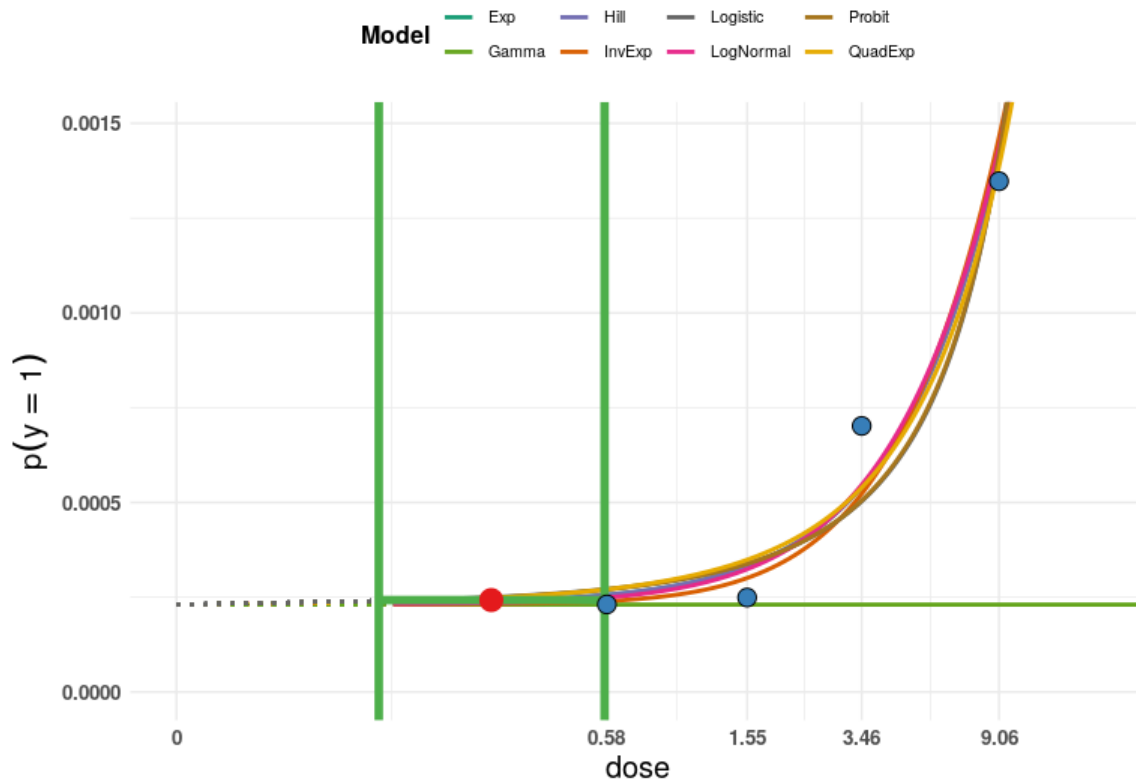

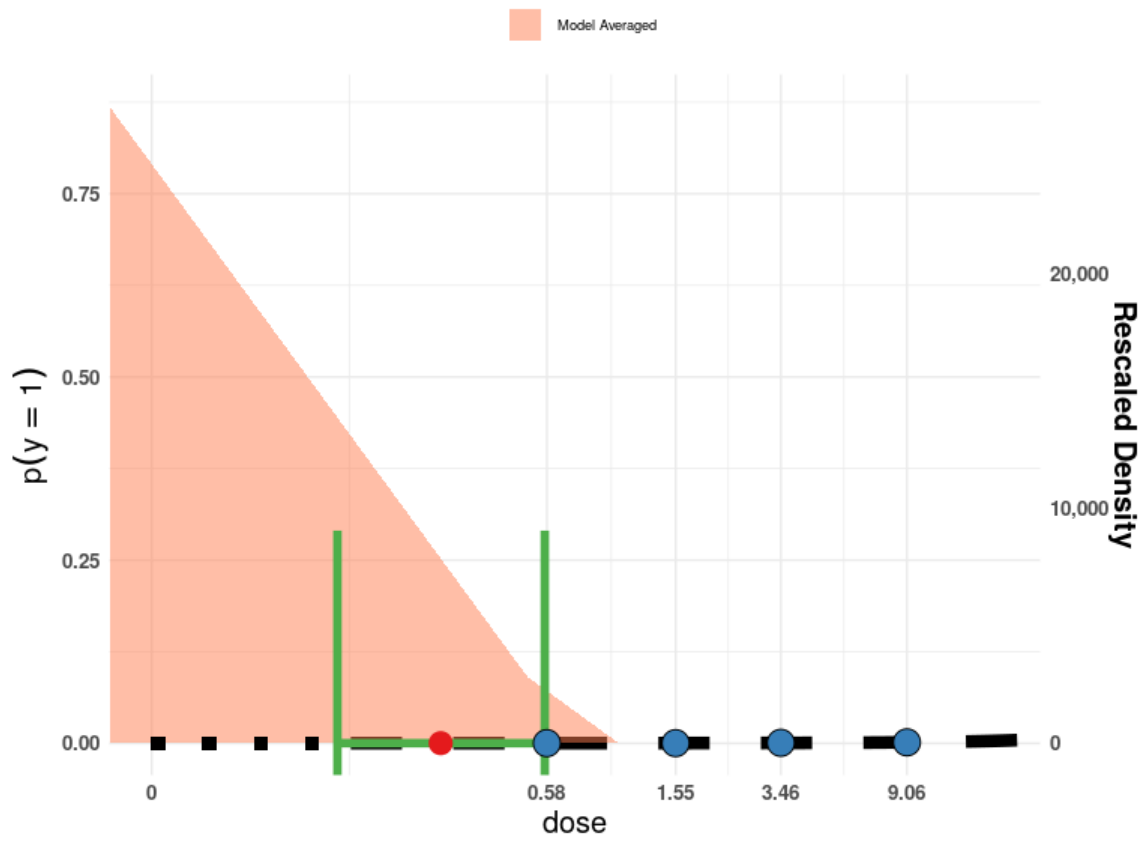

## Steinmaus et al. (2013) bladder cancer, relative BMR 5%

**Exposure: lifetime average before 1971, based on arsenic water concentrations and water intake of 1.9L (included only in the uncertainty analysis)**

### Data Description

The endpoint to be analyzed is: Adj.cases for bladder cancer

Data used for analysis:

| Exposure.µg.kg.bw.per.day | Adj.cases | N      |
|---------------------------|-----------|--------|
| 0.44                      | 27        | 140802 |
| 1.66                      | 36        | 135849 |
| 6.07                      | 73        | 97642  |
| 9.38                      | 95        | 75708  |

The 'Value for CES' is set to 9.59e-06.

Extended dose range is applied.

Informative background prior: min: 0.00018217; the most likely: 0.00019176; max: 0.00020135. Shape parameter is applied.

The 'Sampling Method' is set to Bridge Sampling.

### Results

*Information pertaining to this endpoint.*

#### Goodness of Fit

Best fitting model fits sufficiently well (Bayes factor is 1.95e-03).

#### Model Averaged BMD

| Model          | Type | BMDL  | BMD   | BMDU  |
|----------------|------|-------|-------|-------|
| Model Averaged | BS   | 0.143 | 0.392 | 1.095 |

#### Estimated BMDs per model

| Model | BMDL  | BMD    | BMDU   | Model Weights | Converged |
|-------|-------|--------|--------|---------------|-----------|
| E4_Q  | 0.236 | 0.565  | 1.142  | 0.221         | 1         |
| IE4_Q | 0.453 | 0.947  | 1.767  | 0.018         | 1         |
| H4_Q  | 0.242 | 0.560  | 1.129  | 0.219         | 1         |
| LN4_Q | 0.347 | 0.763  | 1.478  | 0.075         | 1         |
| G4_Q  | 2.865 | 52.283 | 55.775 | 0.000         | 0         |
| QE4_Q | 0.127 | 0.243  | 0.504  | 0.405         | 1         |
| P4_Q  | 0.104 | 0.278  | 0.638  | 0.035         | 1         |
| L4_Q  | 0.091 | 0.260  | 0.605  | 0.027         | 1         |

### Plots of Fitted Models

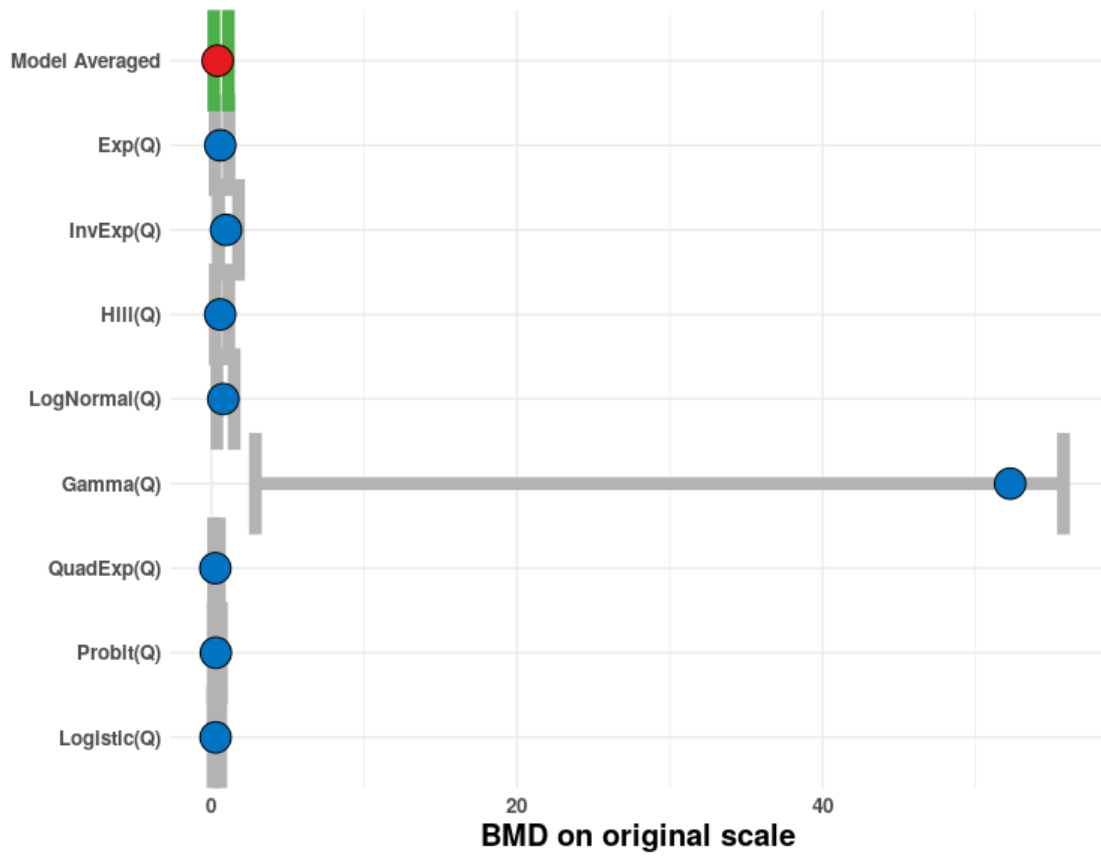

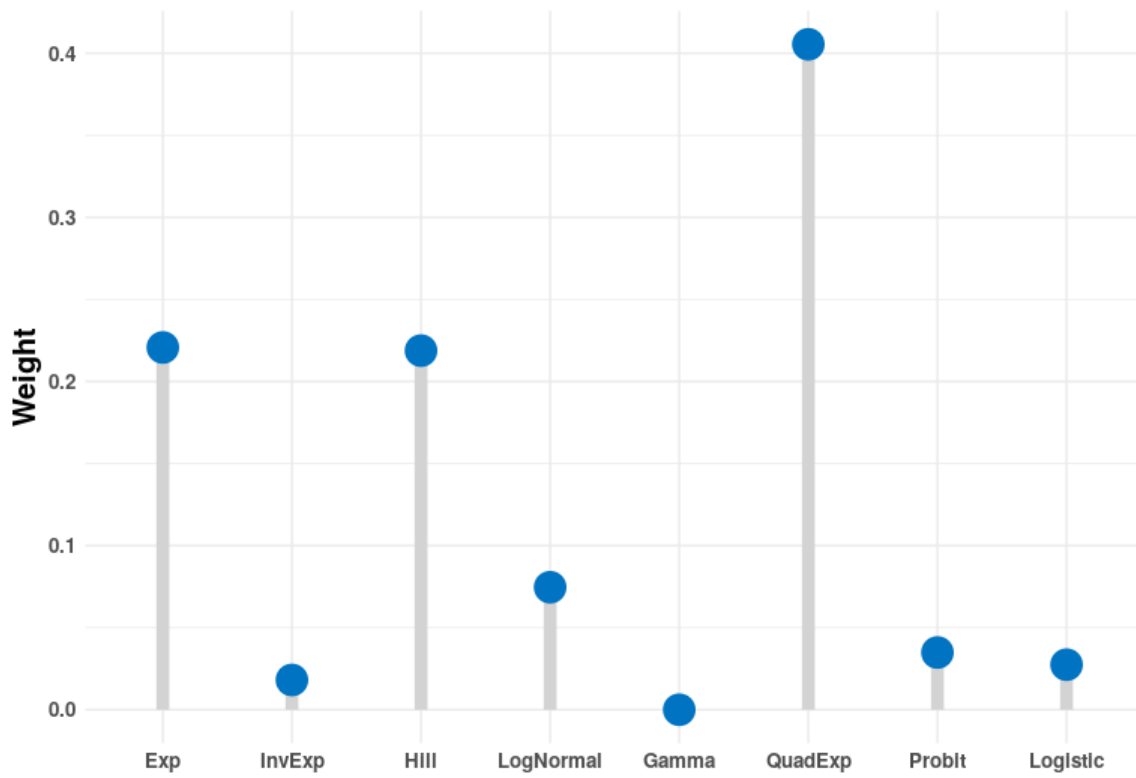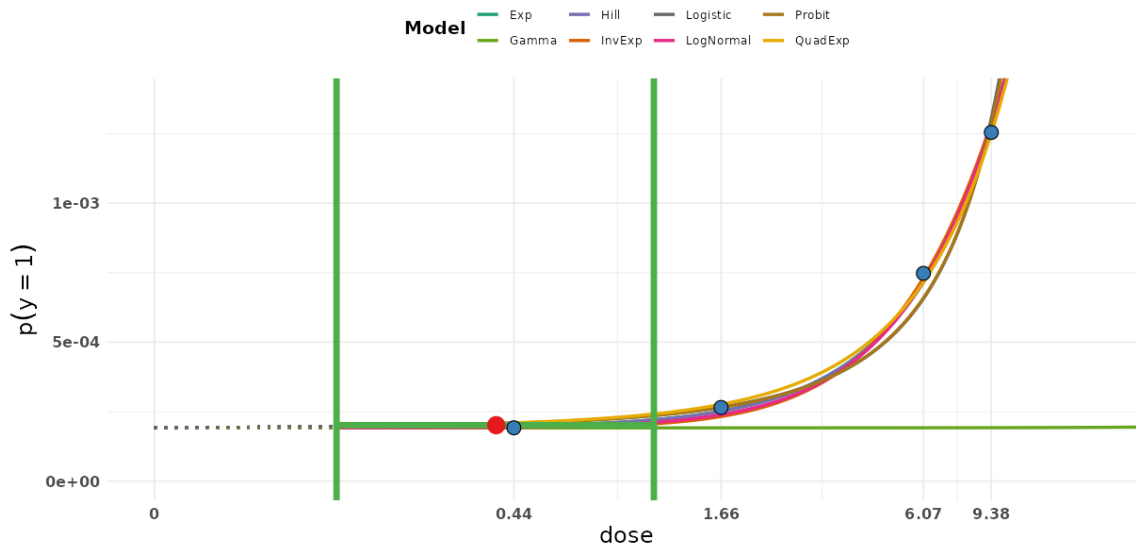

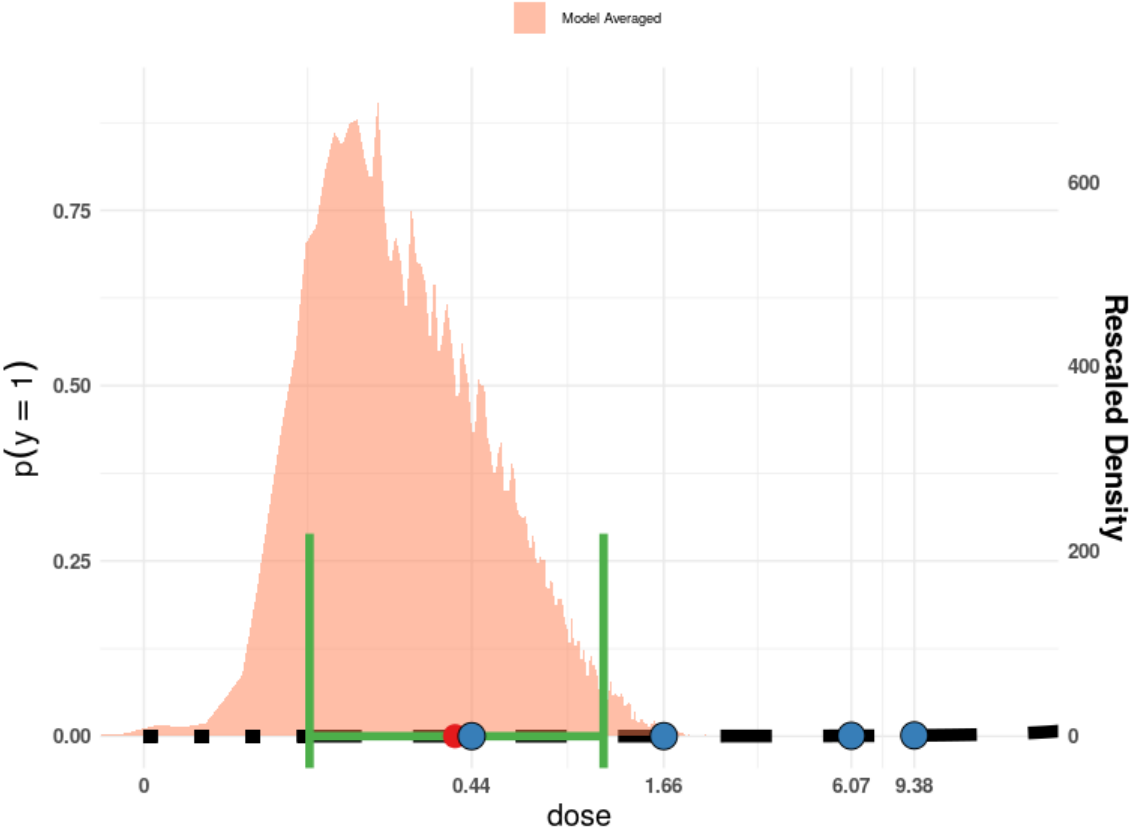



## Steinmaus et al. (2013) bladder cancer, relative BMR 5%

**Exposure: lifetime average before 1971, based on arsenic daily intakes (included only in the uncertainty analysis)**

### Data Description

The endpoint to be analyzed is: Adj.cases for bladder cancer

Data used for analysis:

| Exposure.µg.kg.bw.per.day | Adj.cases | N      |
|---------------------------|-----------|--------|
| 0.44                      | 30        | 140802 |
| 1.57                      | 36        | 136557 |
| 5.18                      | 74        | 108962 |
| 7.79                      | 92        | 63679  |

The 'Value for CES' is set to 1.066e-05.

Extended dose range is applied.

Informative background prior: min: 0.00021093; the most likely: 0.00021307; max: 0.00021520. Shape parameter is applied.

The 'Sampling Method' is set to Bridge Sampling.

### Results

*Information pertaining to this endpoint.*

### Goodness of Fit

Best fitting model fits sufficiently well (Bayes factor is 1.39e-03).

### Model Averaged BMD

| Model          | Type | BMDL  | BMD   | BMDU  |
|----------------|------|-------|-------|-------|
| Model Averaged | BS   | 0.302 | 0.955 | 1.812 |

### Estimated BMDs per model

| Model | BMDL  | BMD    | BMDU   | Model Weights | Converged |
|-------|-------|--------|--------|---------------|-----------|
| E4_Q  | 0.515 | 1.050  | 1.707  | 0.287         | 1         |
| IE4_Q | 0.881 | 1.610  | 2.371  | 0.039         | 1         |
| H4_Q  | 0.525 | 1.043  | 1.701  | 0.285         | 1         |
| LN4_Q | 0.727 | 1.338  | 2.046  | 0.128         | 1         |
| G4_Q  | 0.722 | 60.595 | 60.675 | 0.000         | 0         |
| QE4_Q | 0.175 | 0.333  | 0.563  | 0.078         | 1         |
| P4_Q  | 0.262 | 0.574  | 1.071  | 0.098         | 1         |
| L4_Q  | 0.242 | 0.540  | 1.014  | 0.084         | 1         |

### Plots of Fitted Models

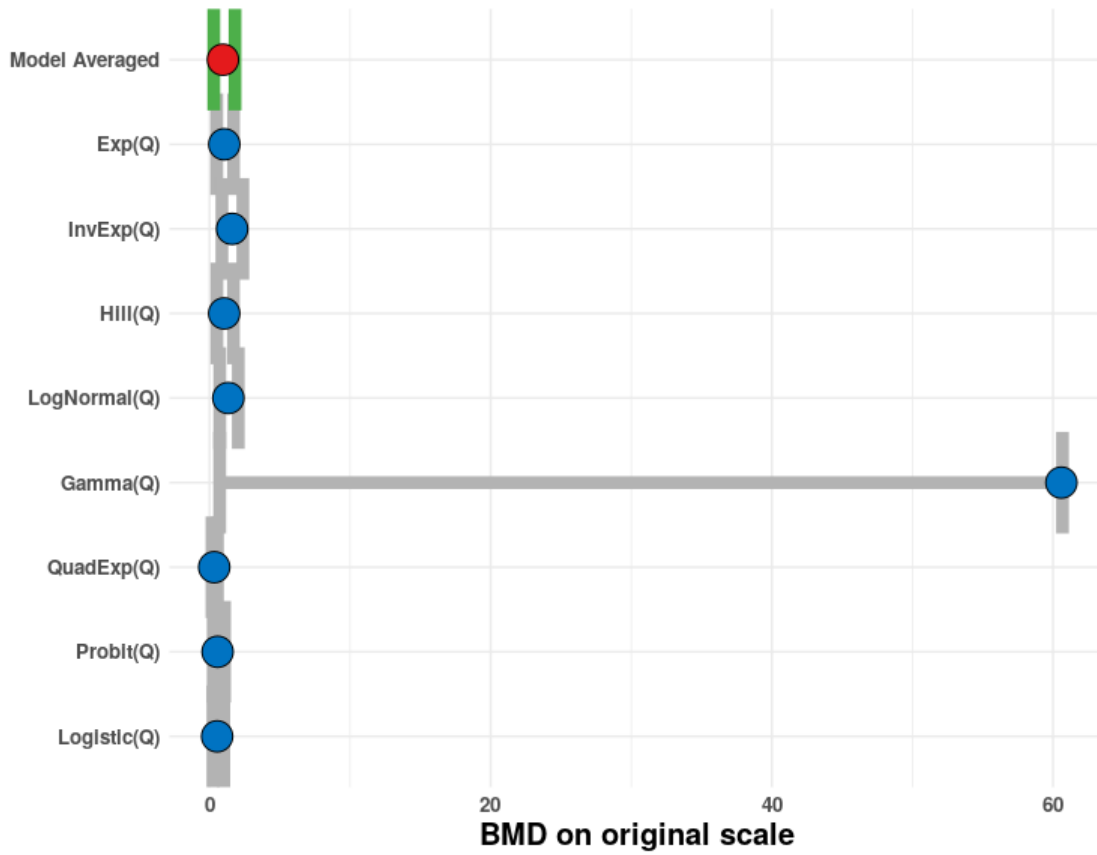

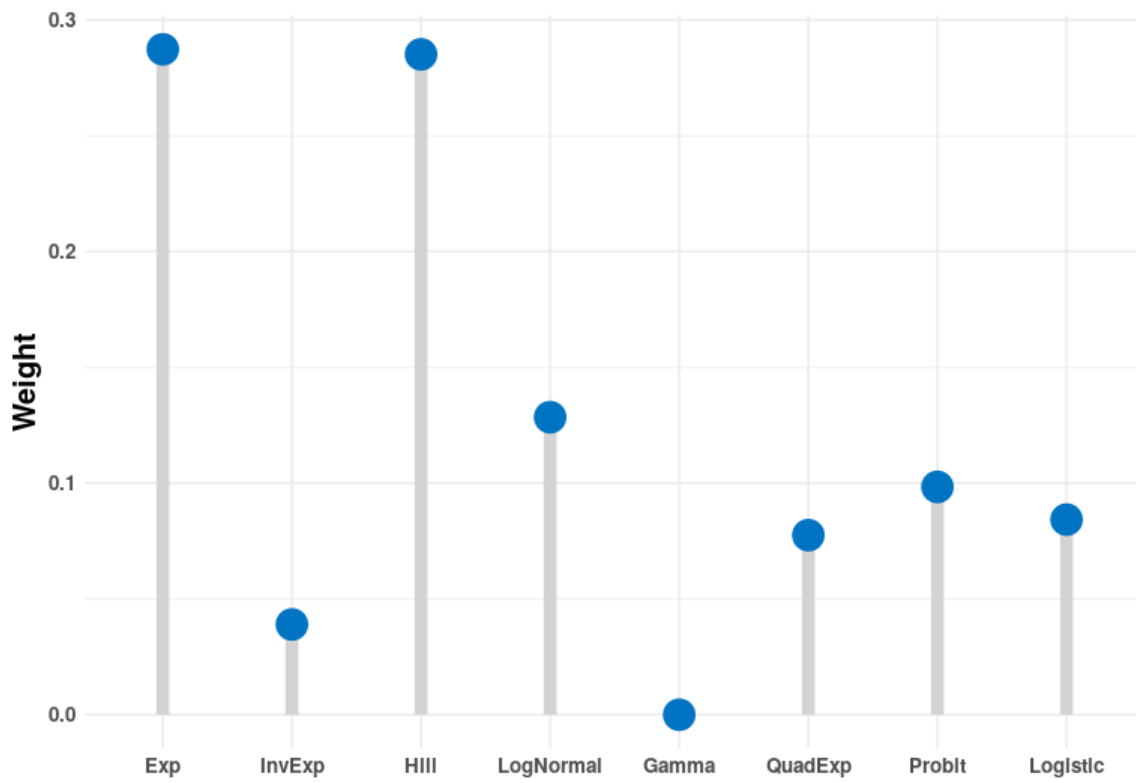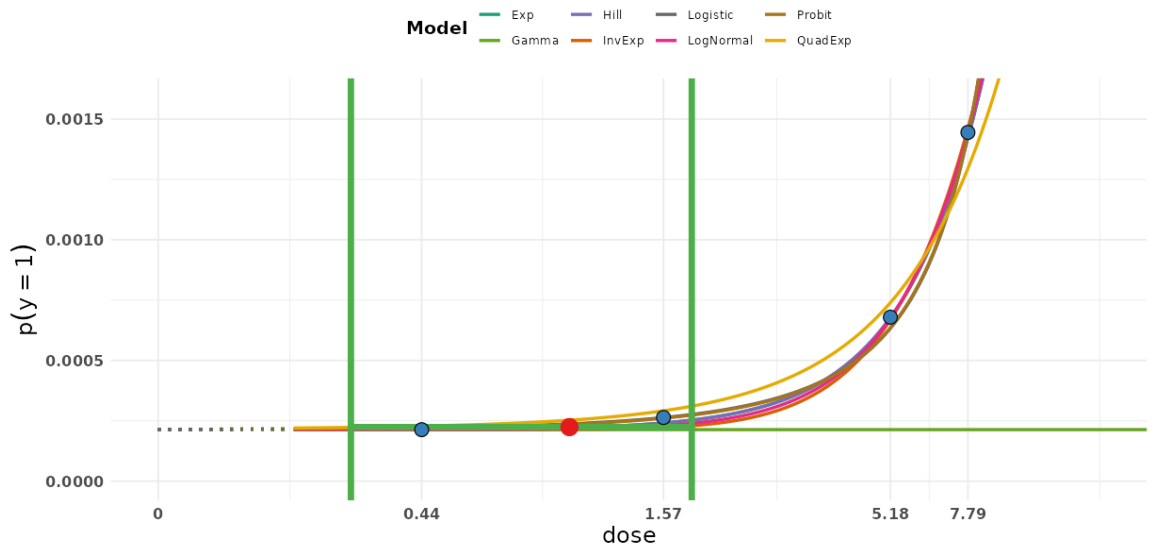

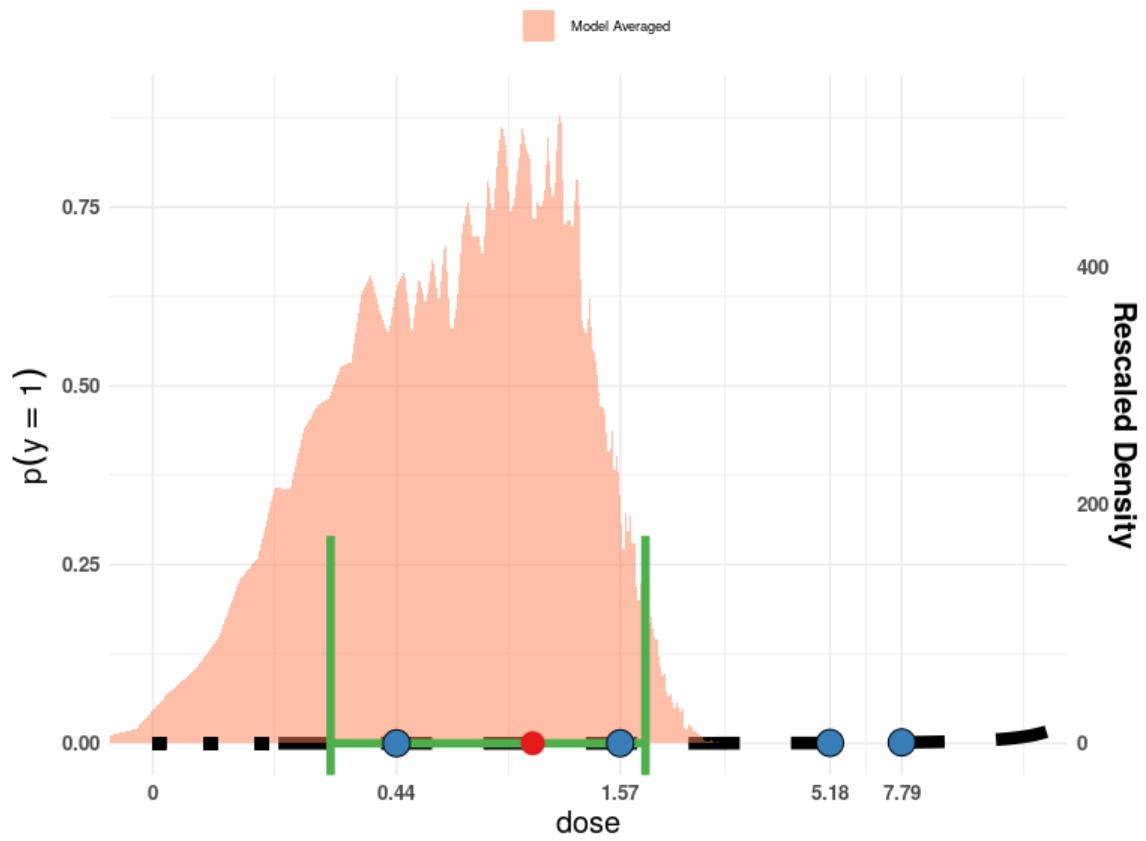

## Steinmaus et al. (2013) lung cancer, relative BMR 5%

**Exposure: lifetime average, all years, based on arsenic water concentrations and water intake of 1.9L (included only in the uncertainty analysis)**

### Data Description

The endpoint to be analyzed is: Adj.cases for lung cancer

Data used for analysis:

| Exposure.µg.kg.bw.per.day | Adj.cases | N      |
|---------------------------|-----------|--------|
| 0.64                      | 64        | 142031 |
| 1.71                      | 58        | 132891 |
| 4.05                      | 76        | 99844  |
| 5.63                      | 107       | 75234  |

The 'Value for CES' is set to 2.254e-05.

Extended dose range is applied.

Informative background prior: min: 0.00044610; the most likely: 0.00045061; max: 0.00045511. Shape parameter is applied.

The 'Sampling Method' is set to Bridge Sampling.

### Results

*Information pertaining to this endpoint.*

#### Goodness of Fit

Best fitting model fits sufficiently well (Bayes factor is 1.72e-03).

#### Model Averaged BMD

| Model          | Type | BMDL  | BMD   | BMDU  |
|----------------|------|-------|-------|-------|
| Model Averaged | BS   | 0.751 | 1.915 | 2.793 |

#### Estimated BMDs per model

| Model | BMDL  | BMD   | BMDU  | Model Weights | Converged |
|-------|-------|-------|-------|---------------|-----------|
| E4_Q  | 1.165 | 1.916 | 2.686 | 0.199         | 1         |
| IE4_Q | 1.668 | 2.420 | 3.121 | 0.059         | 1         |
| H4_Q  | 1.248 | 1.955 | 2.719 | 0.192         | 1         |
| LN4_Q | 1.473 | 2.217 | 2.968 | 0.147         | 1         |
| G4_Q  | 0.751 | 1.658 | 2.646 | 0.132         | 0         |
| QE4_Q | 0.347 | 0.600 | 0.838 | 0.003         | 1         |
| P4_Q  | 0.968 | 1.735 | 2.547 | 0.136         | 1         |
| L4_Q  | 0.970 | 1.677 | 2.550 | 0.132         | 1         |

Plots of Fitted Models

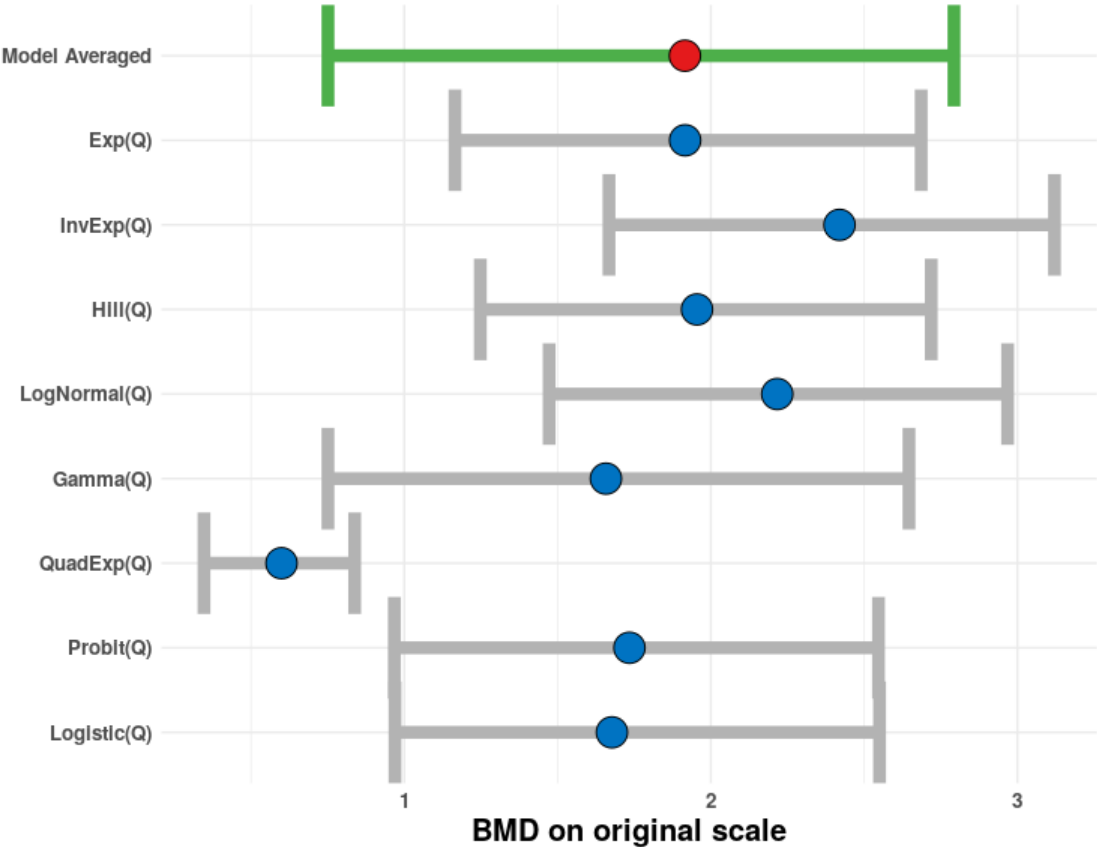

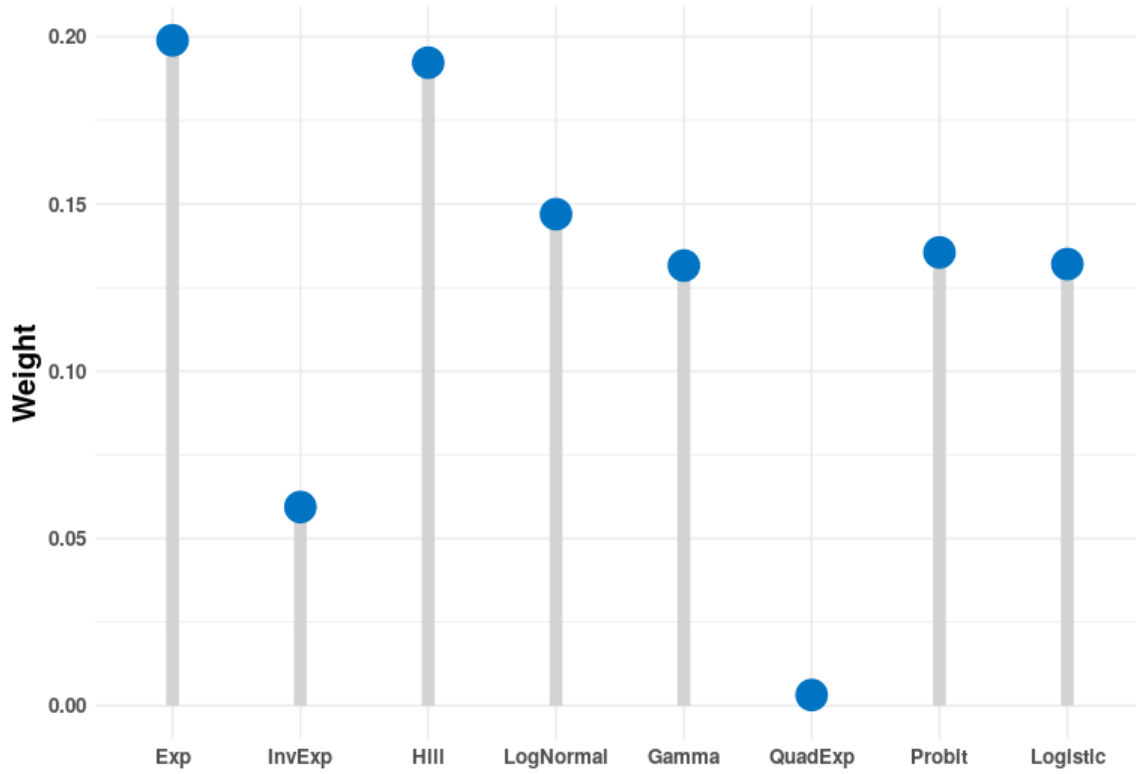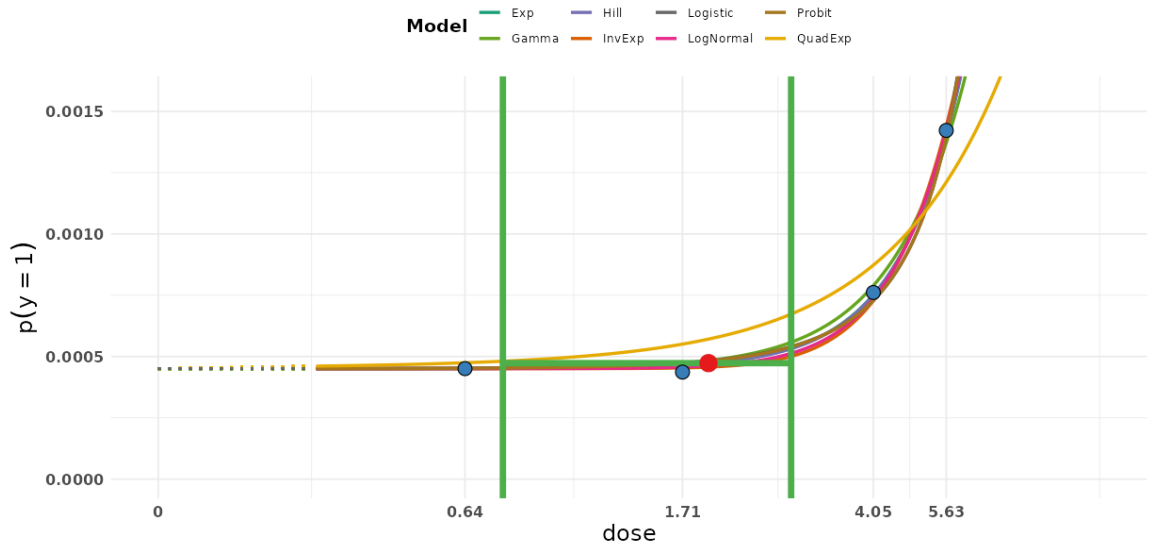

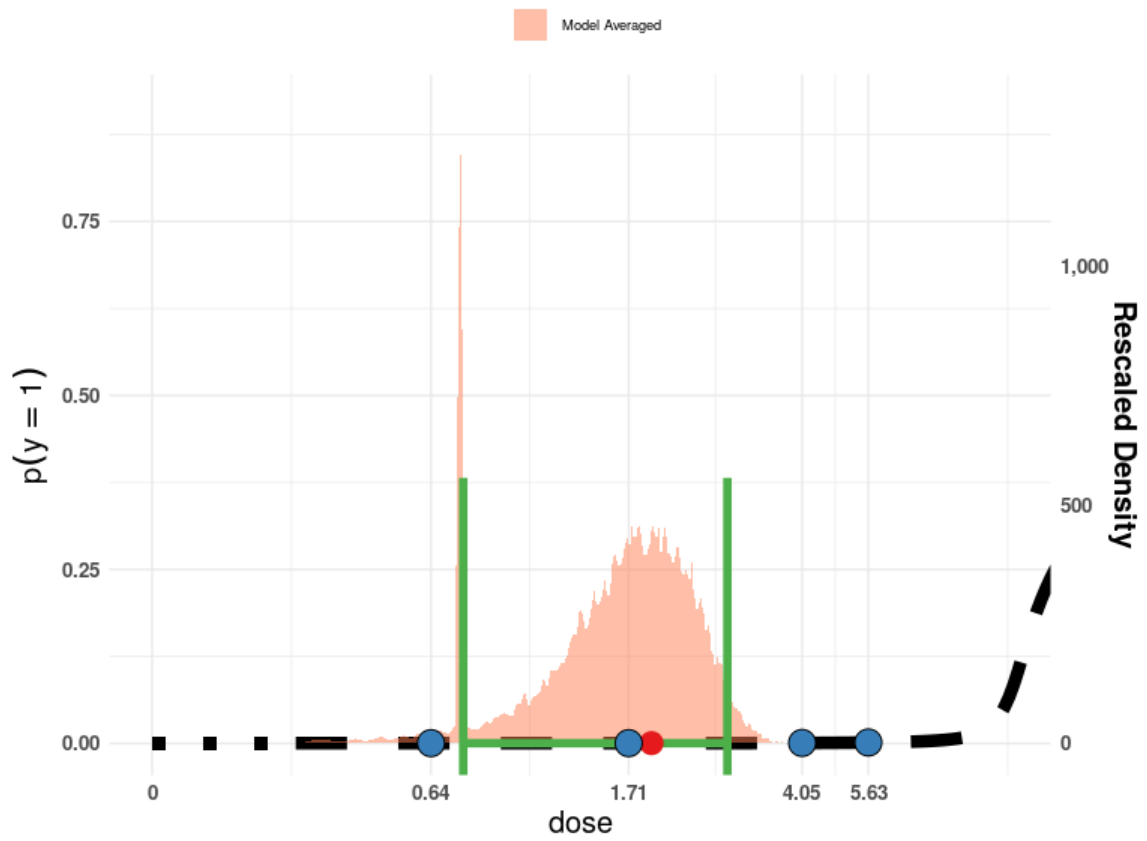



## Steinmaus et al. (2013) lung cancer, relative BMR 5%

**Exposure: lifetime average, all years, based on arsenic daily intakes (the preferred exposure estimate for the study)**

### Data Description

The endpoint to be analyzed is: Adj.cases for lung cancer

Data used for analysis:

| Exposure.µg.kg.bw.per.day | Adj.cases | N      |
|---------------------------|-----------|--------|
| 0.58                      | 70        | 138516 |
| 1.55                      | 60        | 136406 |
| 3.46                      | 68        | 108281 |
| 4.67                      | 107       | 66797  |

The 'Value for CES' is set to 2.528e-05.

Extended dose range is applied.

Informative background prior: min: 0.00048009; the most likely: 0.00050536; max: 0.00053062. Shape parameter is applied.

The 'Sampling Method' is set to Bridge Sampling.

### Results

*Information pertaining to this endpoint.*

#### Goodness of Fit

Best fitting model fits sufficiently well (Bayes factor is 3.00e-03).

#### Model Averaged BMD

| Model          | Type | BMDL  | BMD   | BMDU  |
|----------------|------|-------|-------|-------|
| Model Averaged | BS   | 2.065 | 2.787 | 3.793 |

#### Estimated BMDs per model

| Model | BMDL  | BMD   | BMDU  | Model Weights | Converged |
|-------|-------|-------|-------|---------------|-----------|
| E4_Q  | 2.041 | 2.719 | 3.552 | 0.134         | 1         |
| IE4_Q | 2.475 | 3.155 | 4.087 | 0.164         | 1         |
| H4_Q  | 2.062 | 2.697 | 3.407 | 0.129         | 1         |
| LN4_Q | 2.341 | 2.954 | 3.902 | 0.233         | 1         |
| G4_Q  | 1.985 | 2.470 | 2.746 | 0.071         | 1         |
| QE4_Q | 0.411 | 0.633 | 0.845 | 0.000         | 1         |
| P4_Q  | 1.900 | 2.610 | 3.553 | 0.138         | 1         |
| L4_Q  | 1.871 | 2.605 | 3.467 | 0.131         | 1         |

**Plots of Fitted Models**

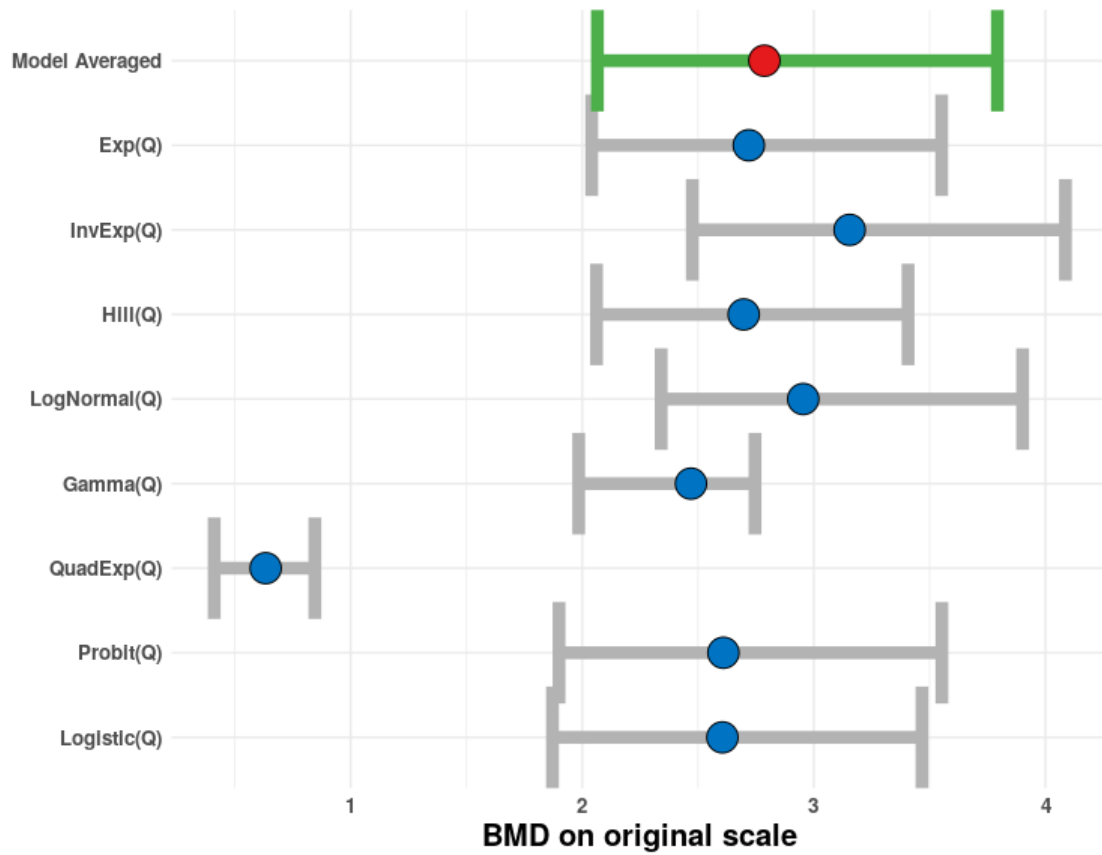

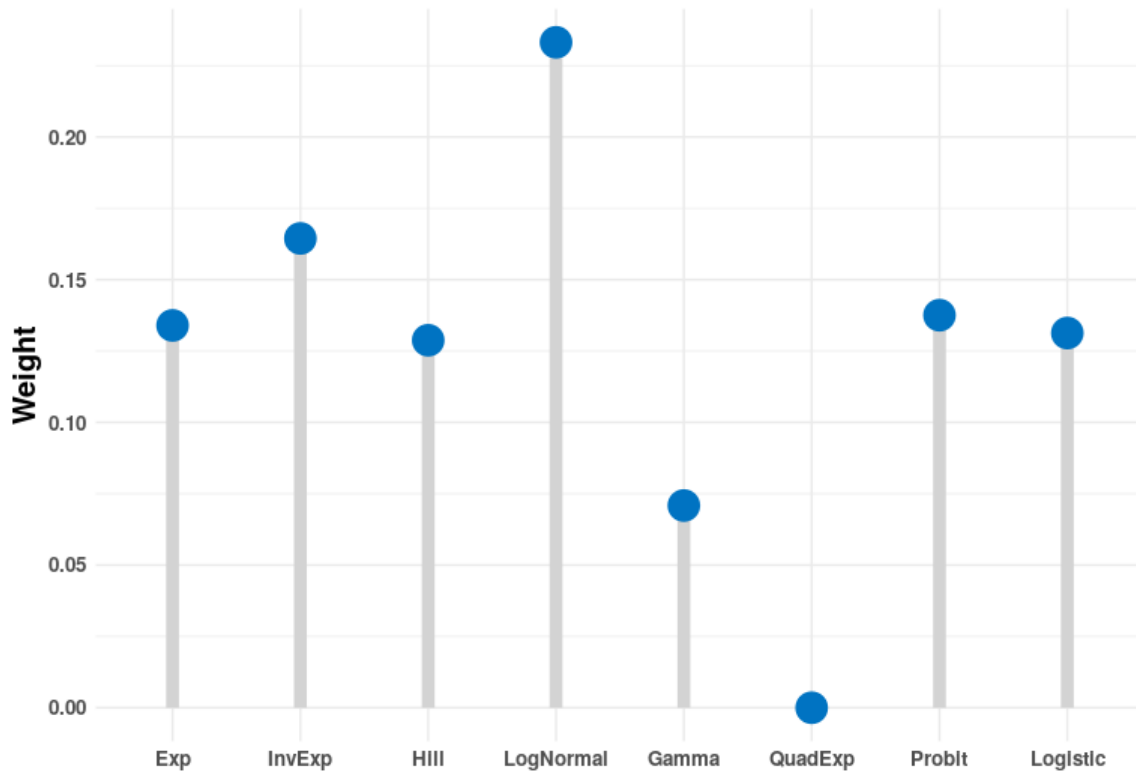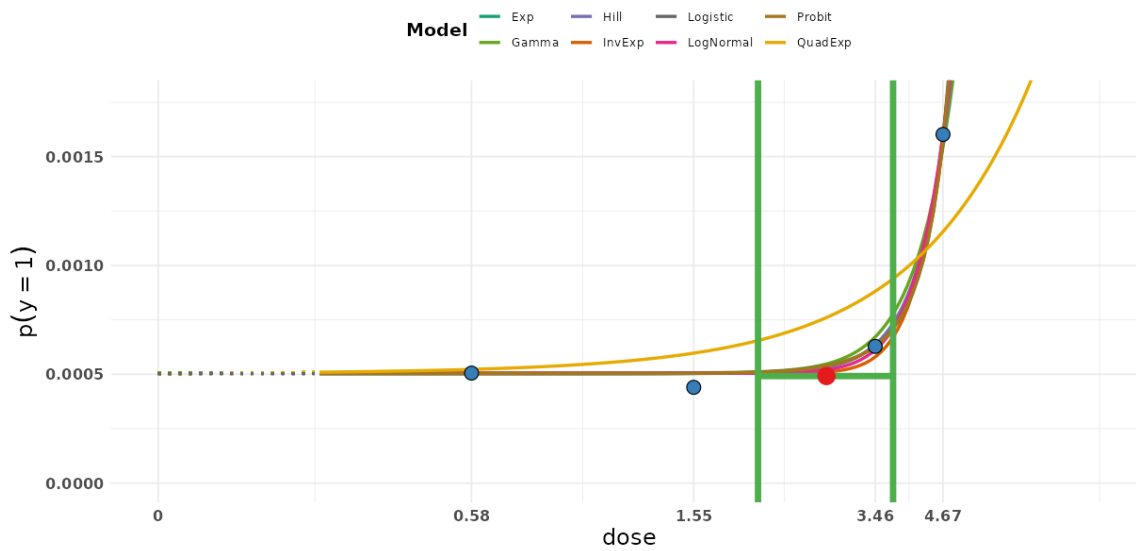

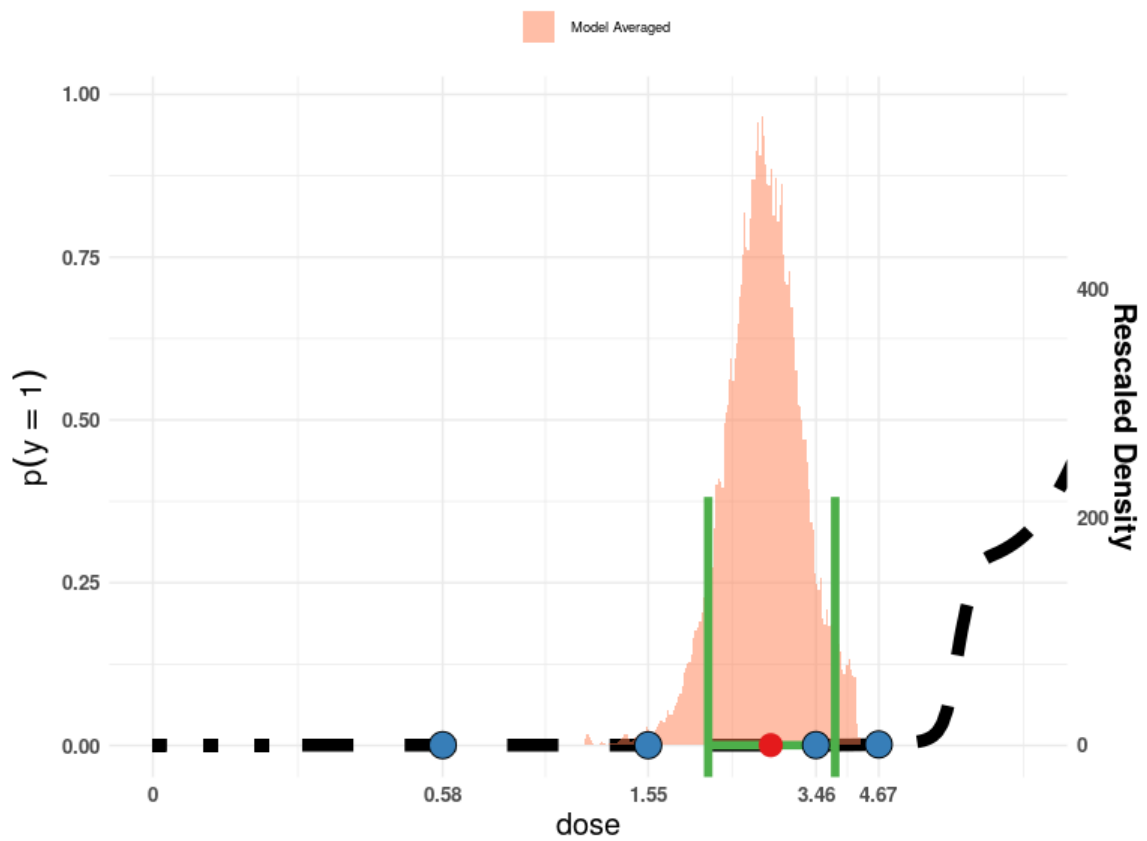

## Steinmaus et al. (2013) lung cancer, relative BMR 5%

**Exposure: lifetime average, all years, based on arsenic daily intakes**

**Sensitivity analysis: the highest exposure point estimate doubled**

### Data Description

The endpoint to be analyzed is: Adj.cases for lung cancer

Data used for analysis:

| Exposure.µg.kg.bw.per.day | Adj.cases | N      |
|---------------------------|-----------|--------|
| 0.58                      | 70        | 138516 |
| 1.55                      | 60        | 136406 |
| 3.46                      | 68        | 108281 |
| 9.06                      | 107       | 66797  |

The 'Value for CES' is set to 2.528e-05.

Extended dose range is applied.

Informative background prior: min: 0.00045482; the most likely: 0.00050536; max: 0.00055589. Shape parameter is applied.

The 'Sampling Method' is set to Bridge Sampling.

### Results

*Information pertaining to this endpoint.*

#### Goodness of Fit

Best fitting model fits sufficiently well (Bayes factor is 4.37e-03).

#### Model Averaged BMD

| Model          | Type | BMDL  | BMD   | BMDU  |
|----------------|------|-------|-------|-------|
| Model Averaged | BS   | 1.139 | 3.055 | 7.786 |

#### Estimated BMDs per model

| Model | BMDL   | BMD    | BMDU   | Model Weights | Converged |
|-------|--------|--------|--------|---------------|-----------|
| E4_Q  | 1.189  | 2.693  | 6.151  | 0.197         | 1         |
| IE4_Q | 2.073  | 5.798  | 7.807  | 0.098         | 0         |
| H4_Q  | 1.234  | 2.546  | 5.860  | 0.183         | 1         |
| LN4_Q | 1.655  | 3.905  | 6.918  | 0.154         | 1         |
| G4_Q  | 75.889 | 78.794 | 81.744 | 0.045         | 1         |
| QE4_Q | 0.480  | 0.838  | 1.227  | 0.021         | 1         |
| P4_Q  | 1.105  | 2.669  | 5.864  | 0.144         | 1         |
| L4_Q  | 1.135  | 2.783  | 6.445  | 0.158         | 1         |

### Plots of Fitted Models

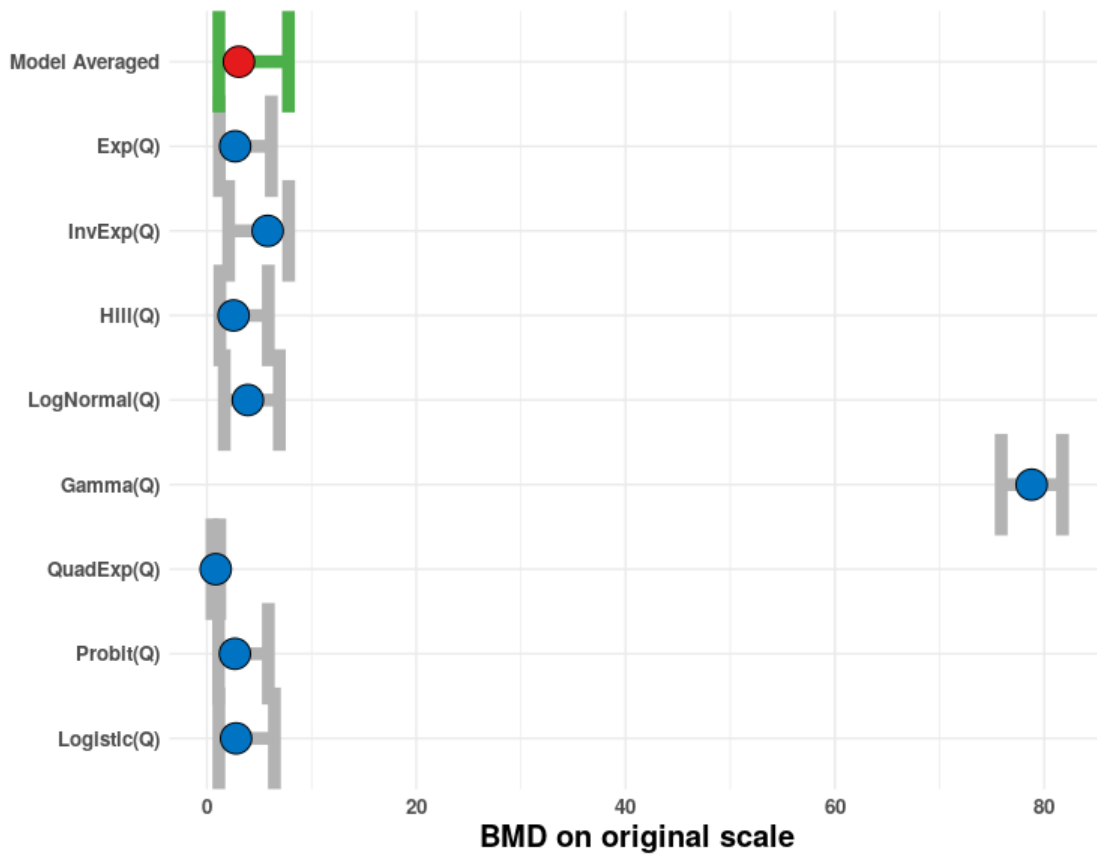

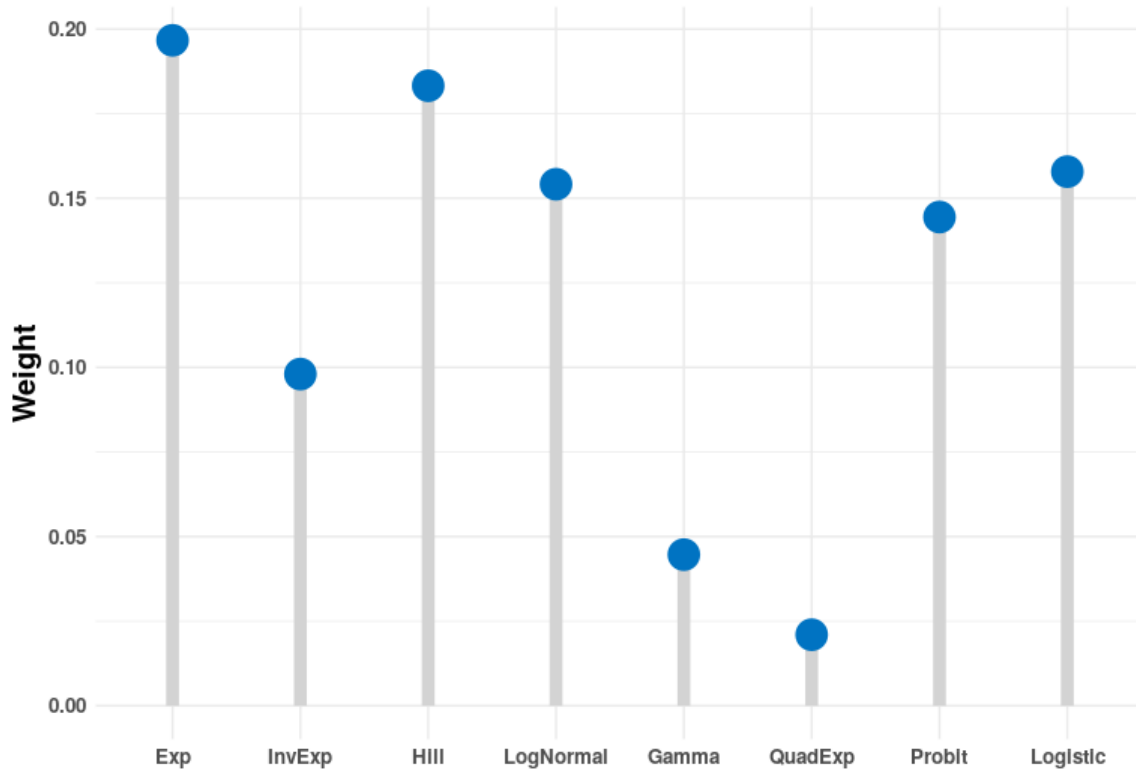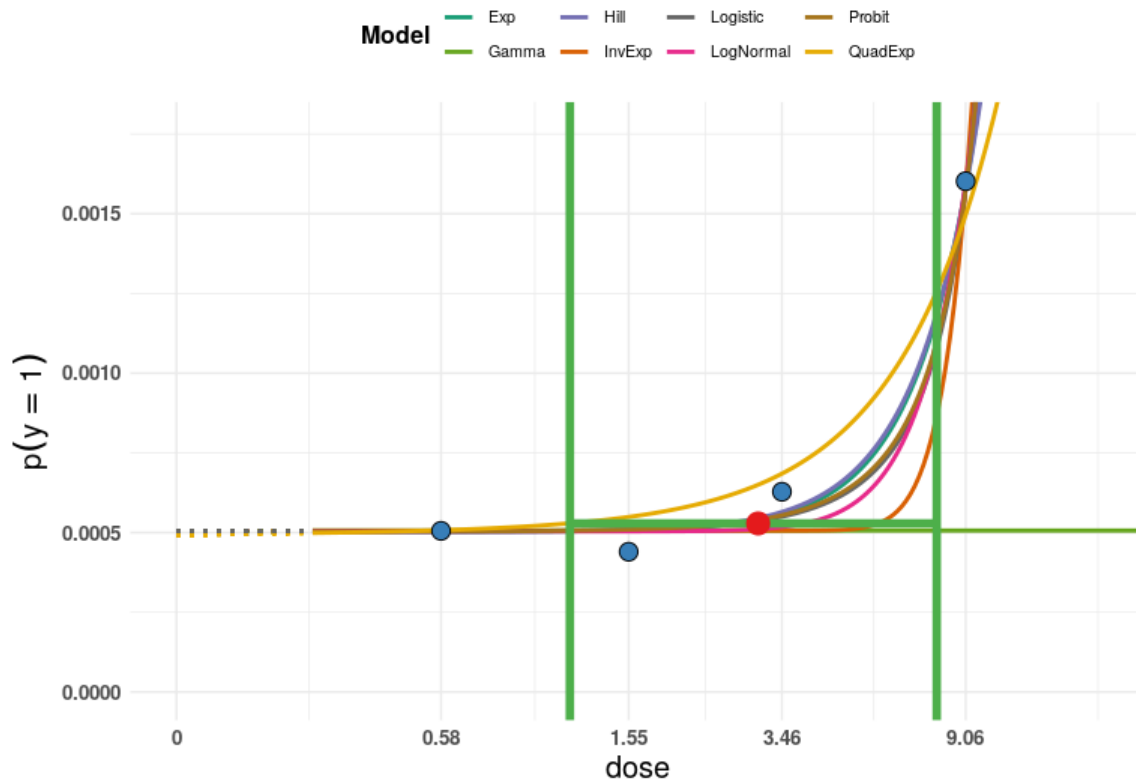

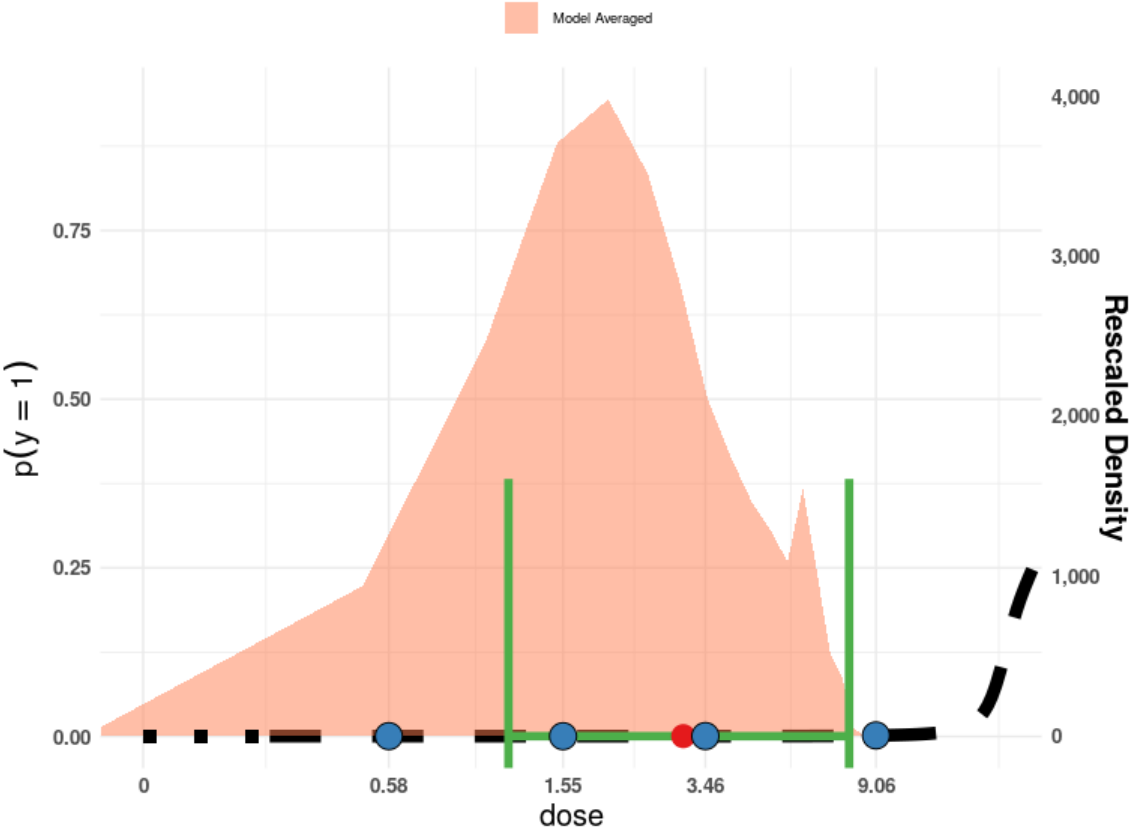



## Steinmaus et al. (2013) lung cancer, relative BMR 5%

**Exposure: lifetime average before 1971, based on arsenic water concentrations and water intake of 1.9L (included only in the uncertainty analysis)**

### Data Description

The endpoint to be analyzed is: Adj.cases for lung cancer

Data used for analysis:

| Exposure.µg.kg.bw.per.day | Adj.cases | N      |
|---------------------------|-----------|--------|
| 0.44                      | 51        | 140802 |
| 1.66                      | 62        | 135849 |
| 6.07                      | 71        | 97642  |
| 9.38                      | 118       | 75708  |

The 'Value for CES' is set to 1.812e-05.

Extended dose range is applied.

Informative background prior: min: 0.00034410; the most likely: 0.00036221; max: 0.00038032. Shape parameter is applied.

The 'Sampling Method' is set to Bridge Sampling.

### Results

*Information pertaining to this endpoint.*

#### Goodness of Fit

Best fitting model fits sufficiently well (Bayes factor is 3.29e-03).

#### Model Averaged BMD

| Model          | Type | BMDL  | BMD   | BMDU  |
|----------------|------|-------|-------|-------|
| Model Averaged | BS   | 0.458 | 1.556 | 3.022 |

#### Estimated BMDs per model

| Model | BMDL  | BMD    | BMDU   | Model Weights | Converged |
|-------|-------|--------|--------|---------------|-----------|
| E4_Q  | 0.816 | 1.814  | 2.993  | 0.221         | 1         |
| IE4_Q | 1.570 | 2.740  | 3.819  | 0.029         | 1         |
| H4_Q  | 0.760 | 1.809  | 3.014  | 0.218         | 1         |
| LN4_Q | 1.189 | 2.343  | 3.488  | 0.098         | 1         |
| G4_Q  | 9.237 | 79.696 | 87.136 | 0.001         | 0         |
| QE4_Q | 0.269 | 0.530  | 0.914  | 0.095         | 1         |
| P4_Q  | 0.534 | 1.285  | 2.405  | 0.172         | 1         |
| L4_Q  | 0.487 | 1.242  | 2.332  | 0.165         | 1         |

### Plots of Fitted Models

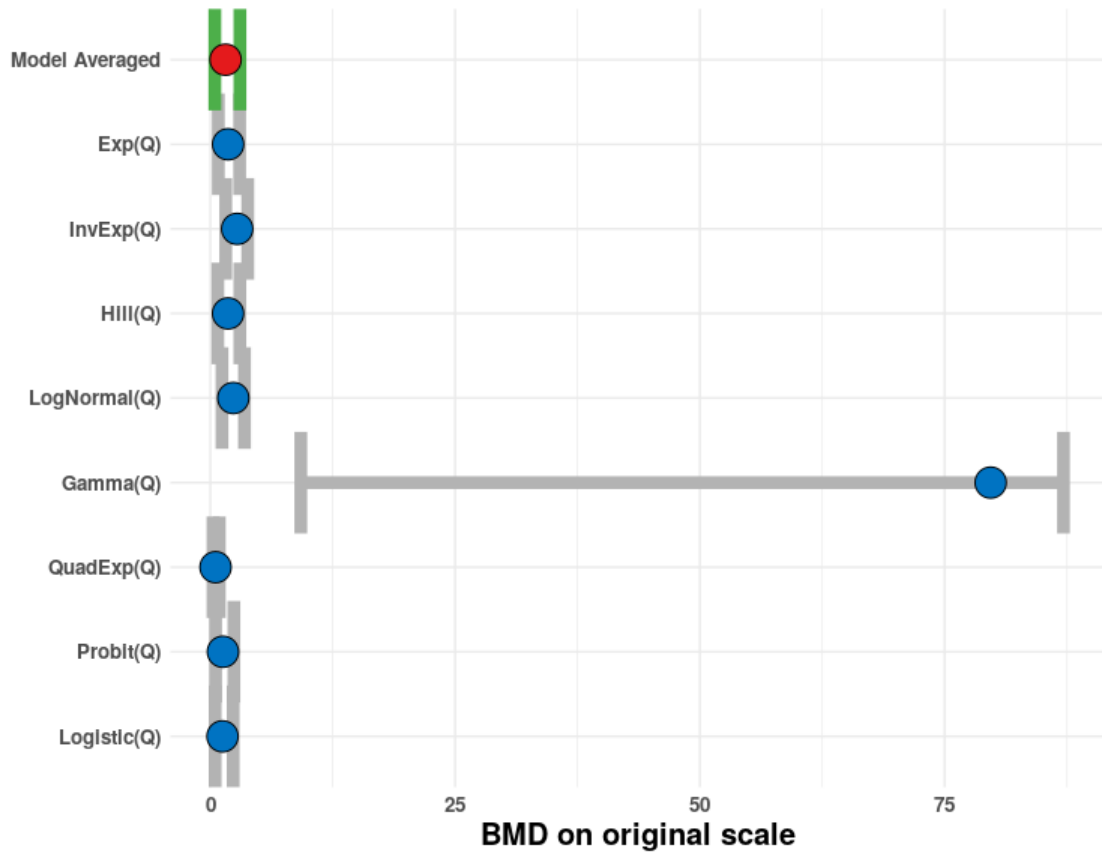

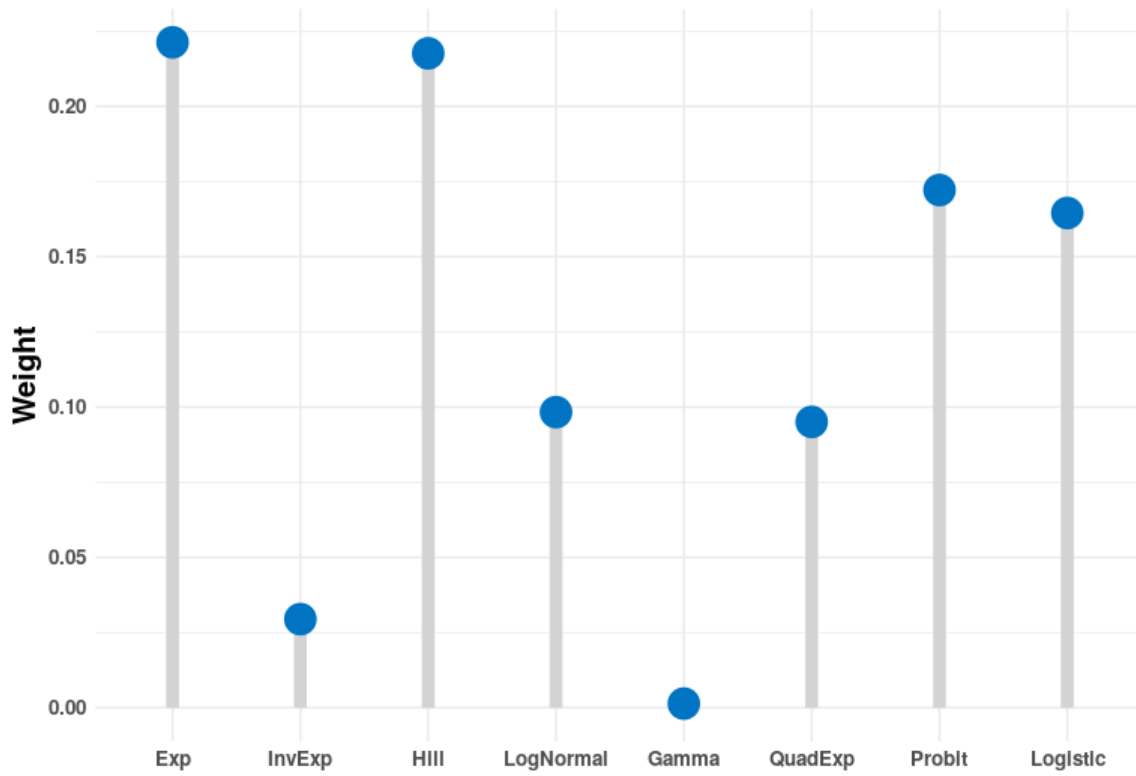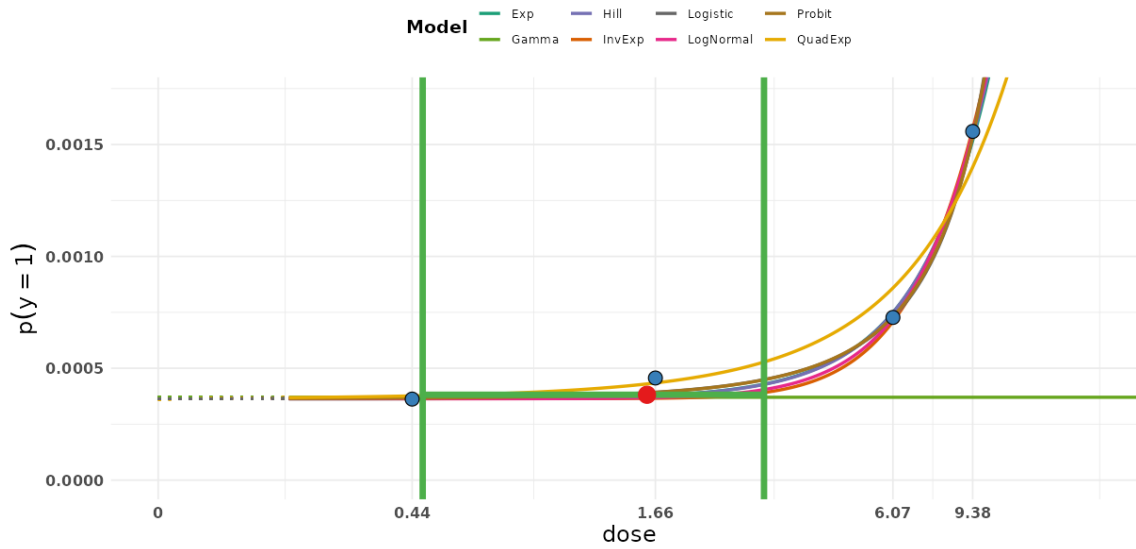

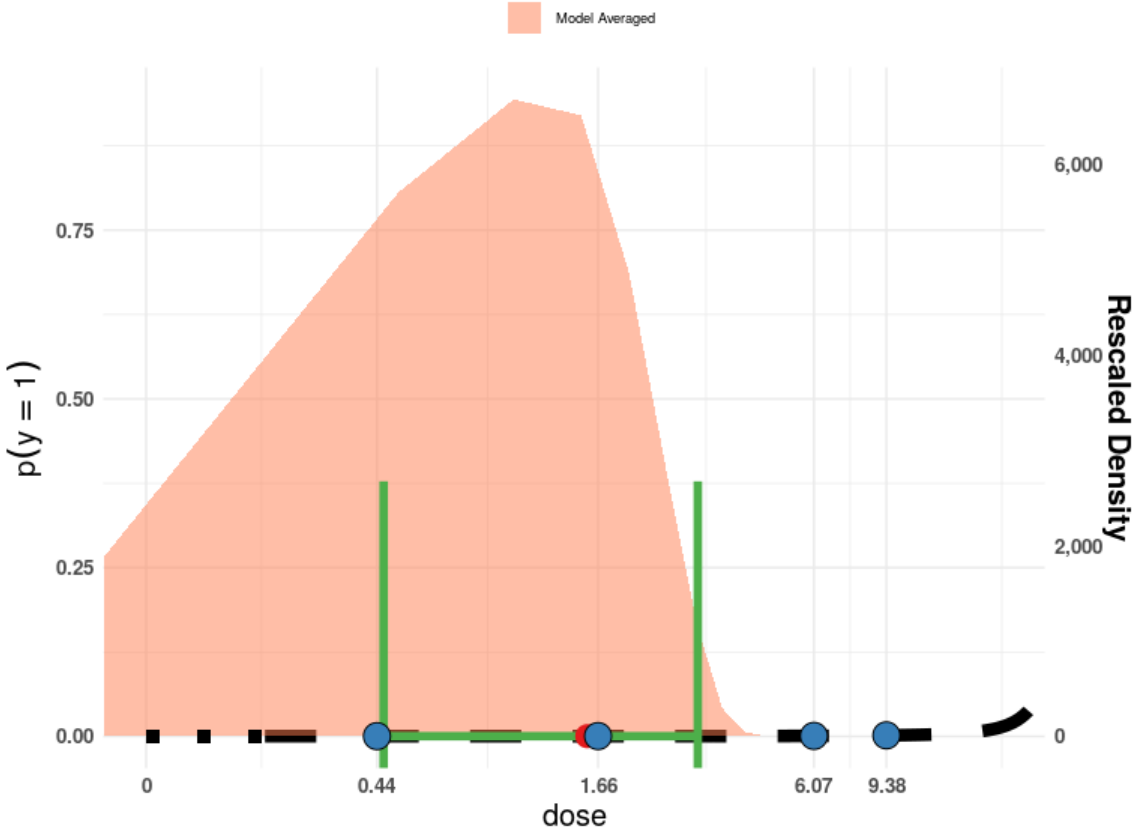

## Steinmaus et al. (2013) lung cancer, relative BMR 5%

**Exposure: lifetime average before 1971, based on arsenic daily intakes (included only in the uncertainty analysis)**

### Data Description

The endpoint to be analyzed is: Adj.cases for lung cancer

Data used for analysis:

| Exposure.µg.kg.bw.per.day | Adj.cases | N      |
|---------------------------|-----------|--------|
| 0.44                      | 54        | 140802 |
| 1.57                      | 62        | 136557 |
| 5.18                      | 68        | 108962 |
| 7.79                      | 119       | 63679  |

The 'Value for CES' is set to 0.00001918.

Extended dose range is applied.

Informative background prior: min: 0.00037968; the most likely: 0.00038352; max: 0.00038735. Shape parameter is applied.

The 'Sampling Method' is set to Bridge Sampling.

### Results

*Information pertaining to this endpoint.*

### Goodness of Fit

Best fitting model fits sufficiently well (Bayes factor is 2.50e-03).

### Model Averaged BMD

| Model          | Type | BMDL  | BMD   | BMDU  |
|----------------|------|-------|-------|-------|
| Model Averaged | BS   | 1.677 | 2.834 | 3.905 |

### Estimated BMDs per model

| Model | BMDL  | BMD   | BMDU  | Model Weights | Converged |
|-------|-------|-------|-------|---------------|-----------|
| E4_Q  | 2.077 | 2.901 | 3.736 | 0.193         | 1         |
| IE4_Q | 2.722 | 3.469 | 4.380 | 0.078         | 1         |
| H4_Q  | 1.993 | 2.896 | 3.793 | 0.191         | 1         |
| LN4_Q | 2.403 | 3.258 | 4.069 | 0.172         | 1         |
| G4_Q  | 2.202 | 3.279 | 6.661 | 0.005         | 0         |
| QE4_Q | 0.344 | 0.605 | 0.862 | 0.000         | 1         |
| P4_Q  | 1.471 | 2.375 | 3.520 | 0.183         | 1         |
| L4_Q  | 1.401 | 2.313 | 3.402 | 0.179         | 1         |

**Plots of Fitted Models**

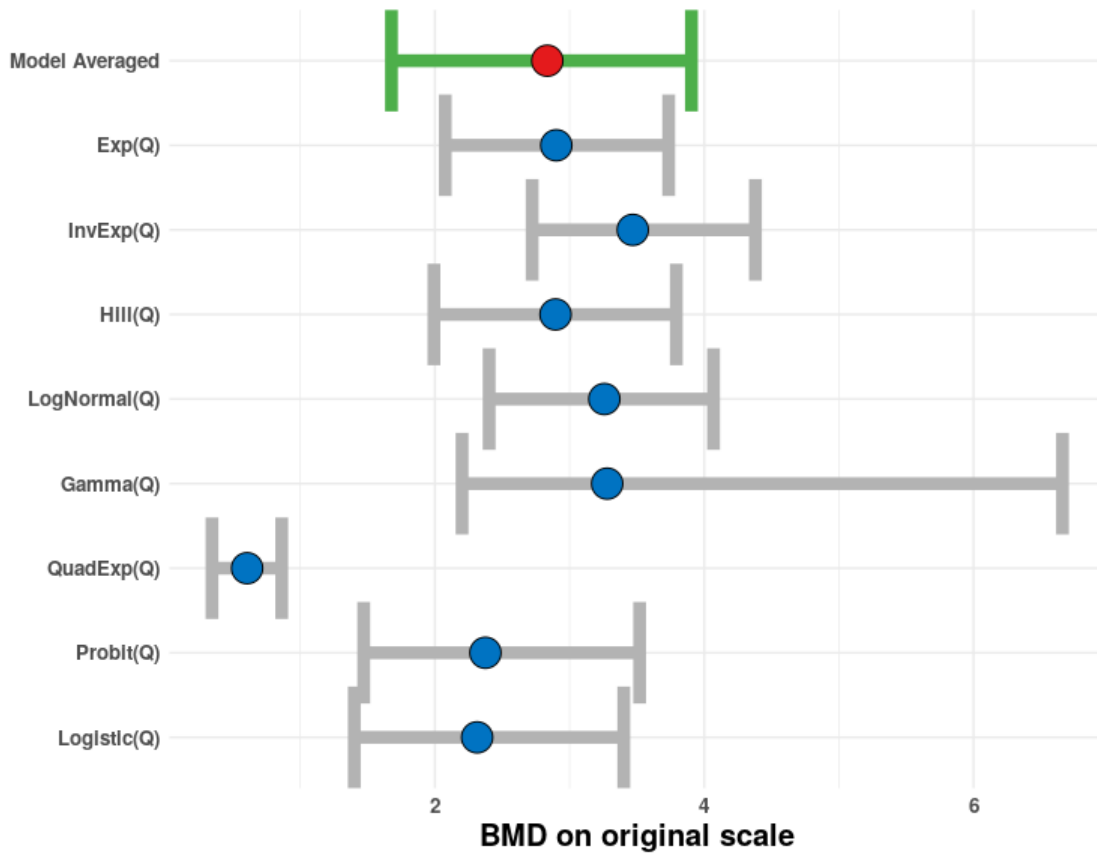

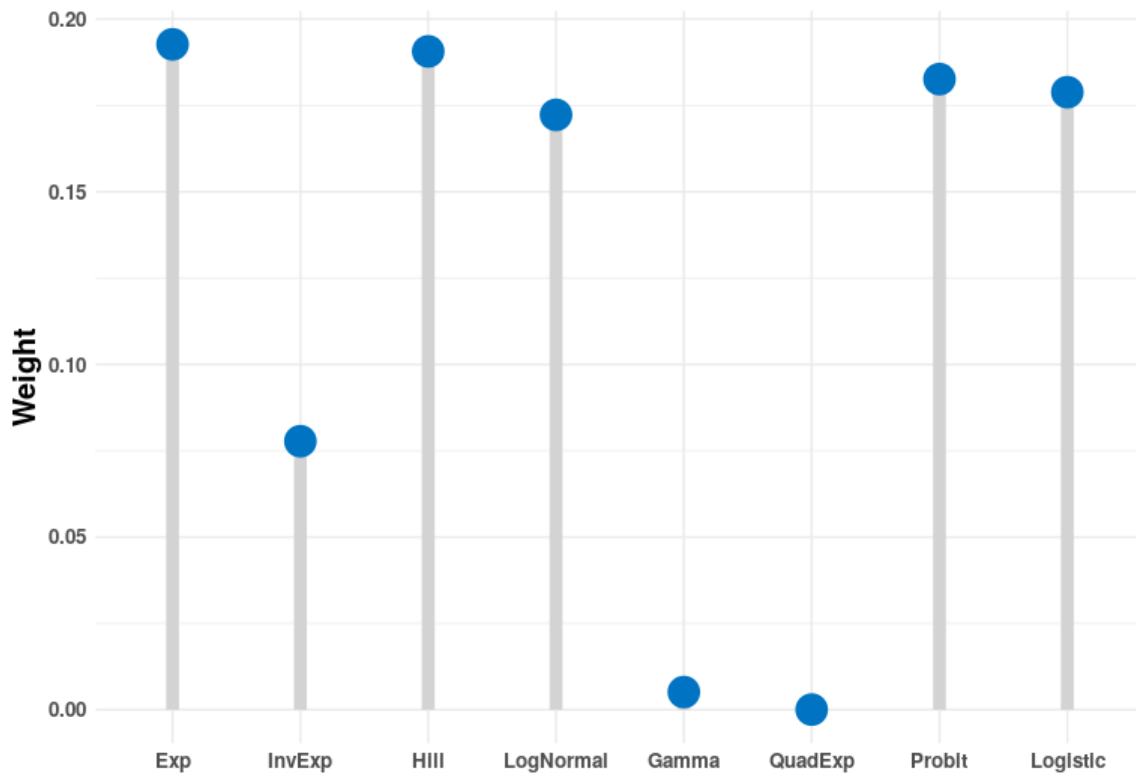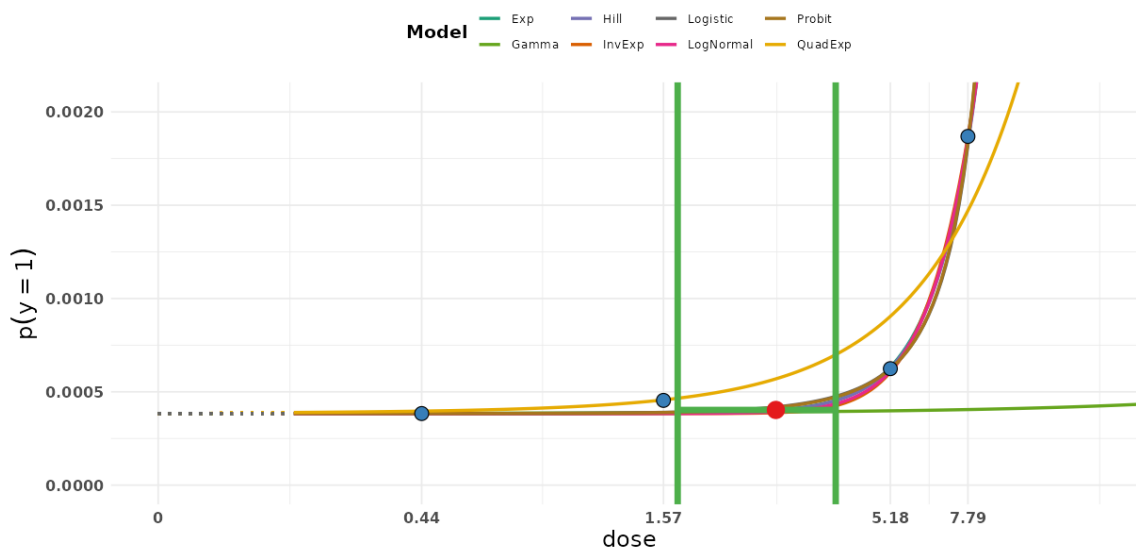

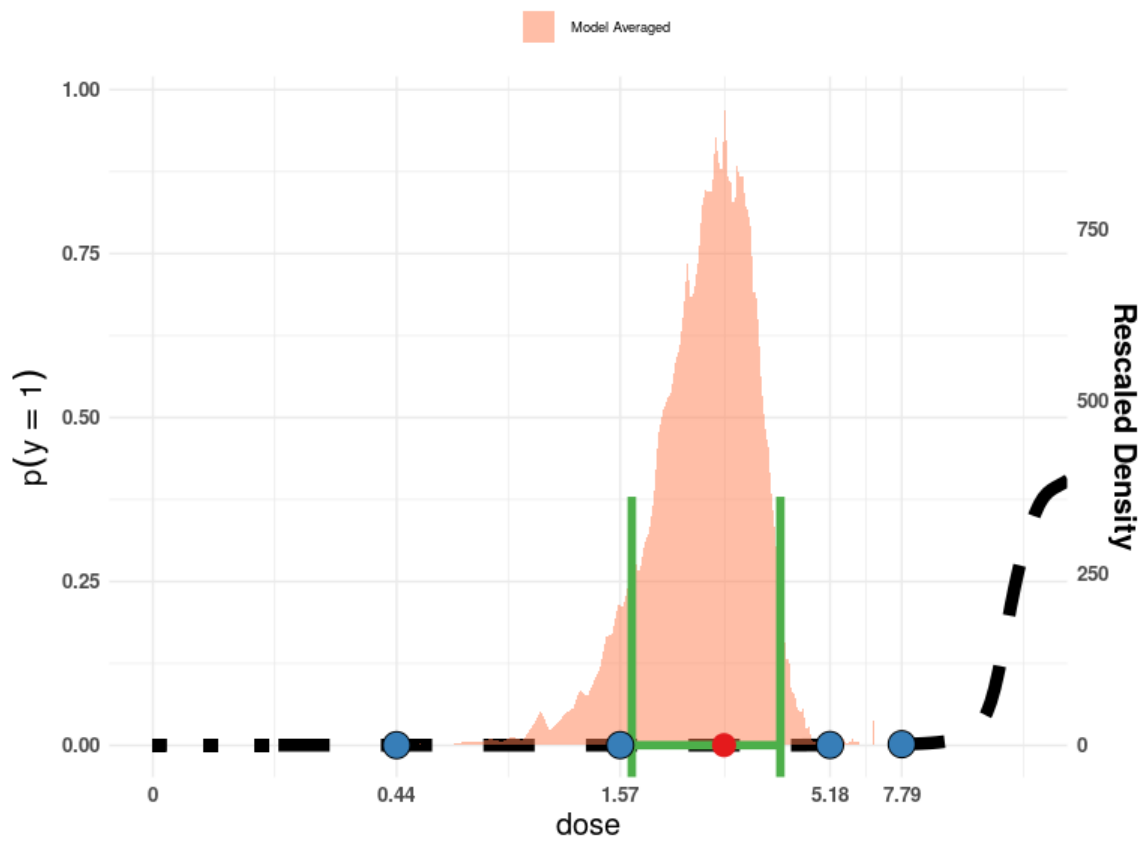



## Steinmaus et al. (2014a) lung cancer, relative BMR 5%

**Exposure: lifetime average, based on arsenic daily intakes (only included in the uncertainty analysis)**

### Data Description

The endpoint to be analyzed is: Adj.cases for lung cancer

Data used for analysis:

| Exposure.µg.kg.bw.per.day | Adj.cases | N     |
|---------------------------|-----------|-------|
| 0.32                      | 27        | 80469 |
| 0.53                      | 28        | 74219 |
| 1.58                      | 37        | 70313 |

The 'Value for CES' is set to 1.678e-05.

Extended dose range is not applied.

Informative background prior: min: 0.00033218; the most likely: 0.00033553; max: 0.00033889. Shape parameter is applied.

The 'Sampling Method' is set to Bridge Sampling.

### Results

*Information pertaining to this endpoint.*

#### Goodness of Fit

Best fitting model fits sufficiently well (Bayes factor is 1.74e+00).

#### Model Averaged BMD

| Model          | Type | BMDL  | BMD   | BMDU  |
|----------------|------|-------|-------|-------|
| Model Averaged | BS   | 0.186 | 0.756 | 1.478 |

#### Estimated BMDs per model

| Model | BMDL  | BMD   | BMDU  | Model Weights | Converged |
|-------|-------|-------|-------|---------------|-----------|
| E4_Q  | 0.201 | 0.777 | 1.400 | 0.143         | 1         |
| IE4_Q | 0.704 | 1.352 | 1.534 | 0.047         | 0         |
| H4_Q  | 0.186 | 0.782 | 1.422 | 0.138         | 1         |
| LN4_Q | 0.462 | 1.241 | 1.538 | 0.088         | 0         |
| G4_Q  | 0.184 | 0.616 | 1.361 | 0.143         | 0         |
| QE4_Q | 0.153 | 0.407 | 1.300 | 0.185         | 1         |
| P4_Q  | 0.180 | 0.783 | 1.375 | 0.125         | 1         |
| L4_Q  | 0.210 | 0.804 | 1.417 | 0.130         | 1         |

**Plots of Fitted Models**

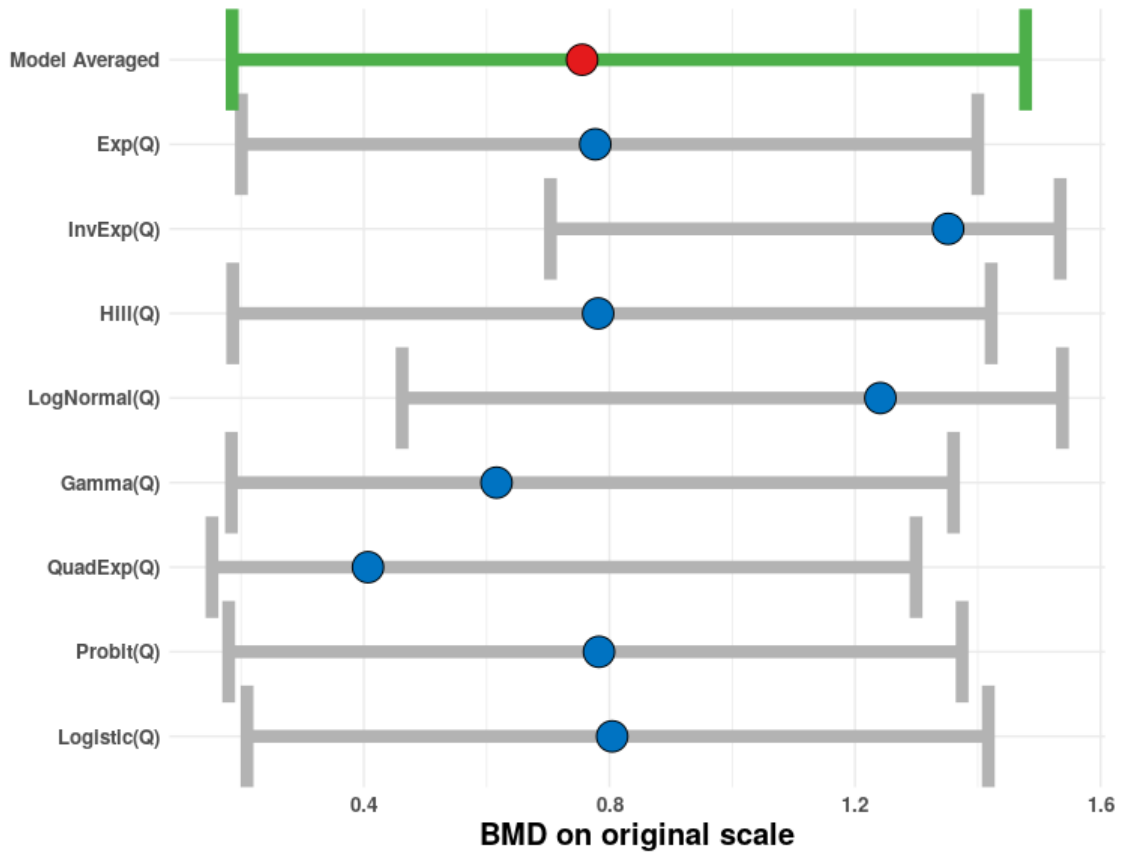

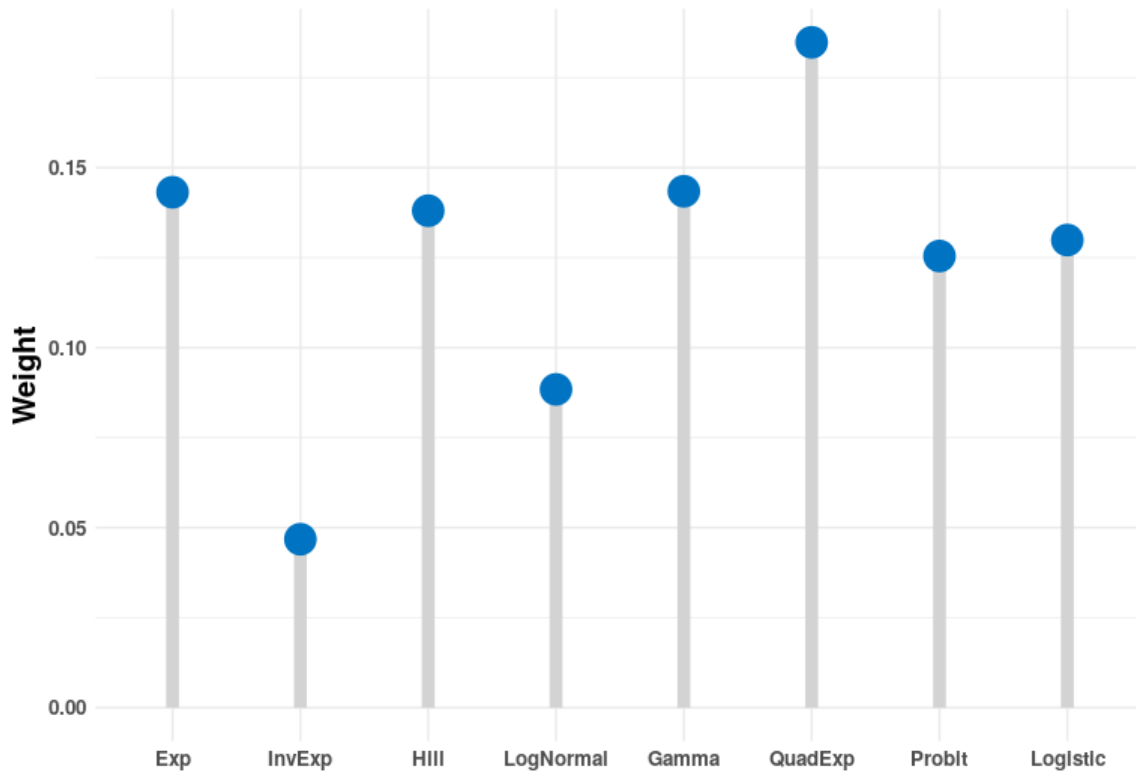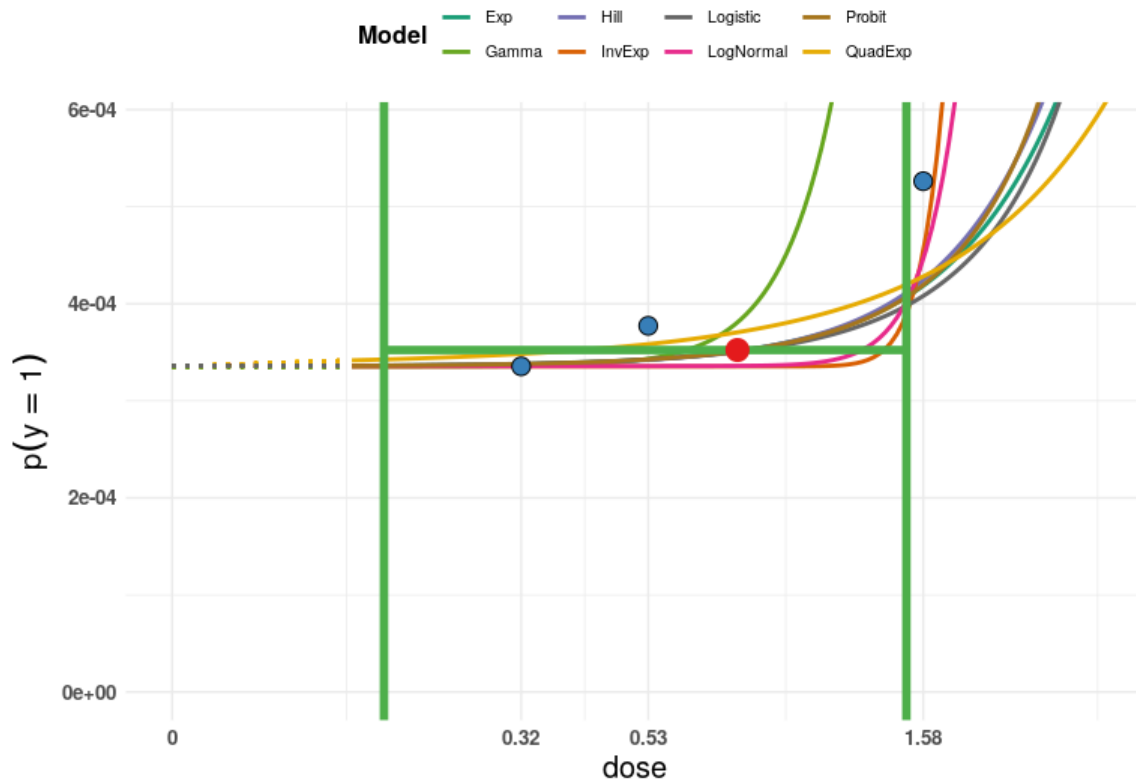

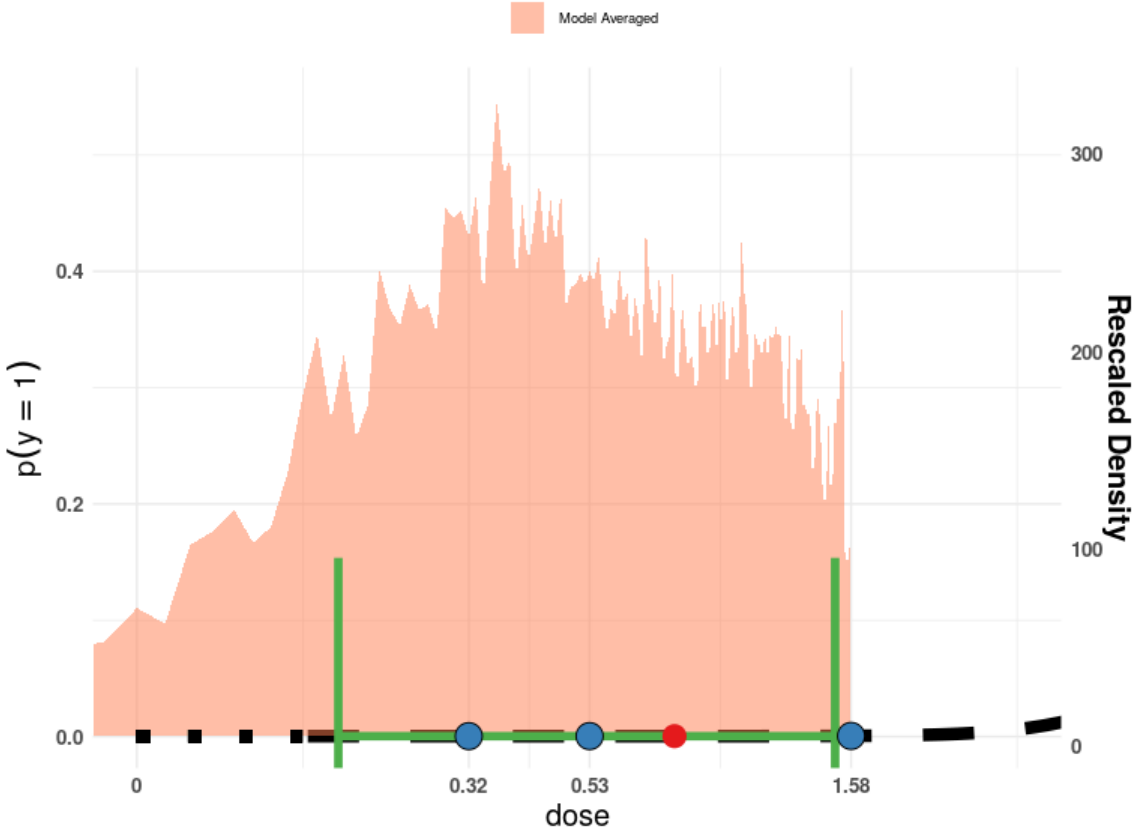

## Steinmaus et al. (2014a) lung cancer, relative BMR 5%

**Exposure: lifetime average, based on arsenic daily intakes, source population decreased by 10% (only included in the uncertainty analysis)**

### Data Description

The endpoint to be analyzed is: Adj.cases for lung cancer

Data used for analysis:

| Exposure.µg.kg.bw.per.day | Adj.cases | N     |
|---------------------------|-----------|-------|
| 0.32                      | 27        | 72422 |
| 0.53                      | 28        | 66797 |
| 1.58                      | 37        | 63281 |

The 'Value for CES' is set to 1.865e-05.

Extended dose range is not applied.

Informative background prior: min: 0.00036909; the most likely: 0.00037281; max: 0.00037654. Shape parameter is applied.

The 'Sampling Method' is set to Bridge Sampling.

### Results

*Information pertaining to this endpoint.*

#### Goodness of Fit

Best fitting model fits sufficiently well (Bayes factor is 1.84e+00).

#### Model Averaged BMD

| Model          | Type | BMDL | BMD   | BMDU  |
|----------------|------|------|-------|-------|
| Model Averaged | BS   | 0.18 | 0.776 | 1.441 |

#### Estimated BMDs per model

| Model | BMDL  | BMD   | BMDU  | Model Weights | Converged |
|-------|-------|-------|-------|---------------|-----------|
| E4_Q  | 0.209 | 0.799 | 1.418 | 0.141         | 1         |
| IE4_Q | 0.777 | 1.352 | 1.543 | 0.048         | 1         |
| H4_Q  | 0.164 | 0.760 | 1.385 | 0.138         | 1         |
| LN4_Q | 0.495 | 1.159 | 1.470 | 0.081         | 1         |
| G4_Q  | 0.180 | 0.721 | 1.367 | 0.150         | 1         |
| QE4_Q | 0.153 | 0.424 | 1.377 | 0.186         | 1         |
| P4_Q  | 0.204 | 0.784 | 1.418 | 0.125         | 1         |
| L4_Q  | 0.208 | 0.829 | 1.439 | 0.132         | 1         |

**Plots of Fitted Models**

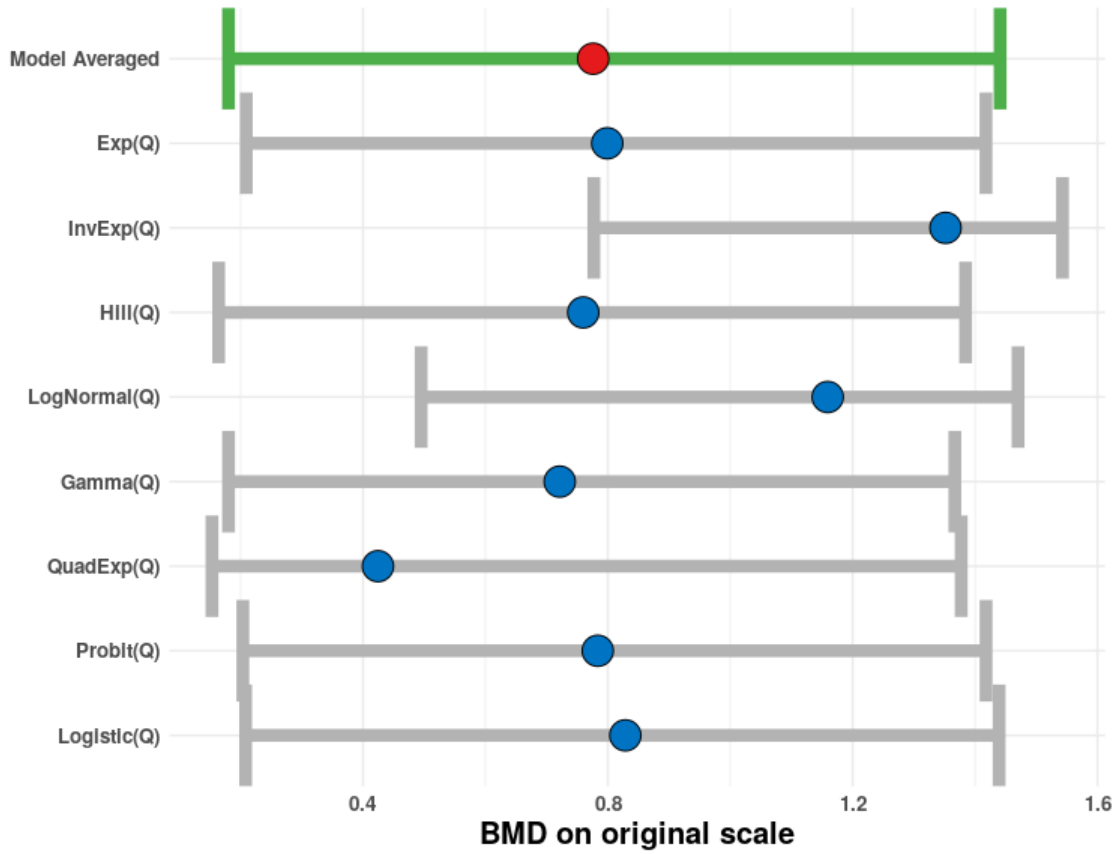

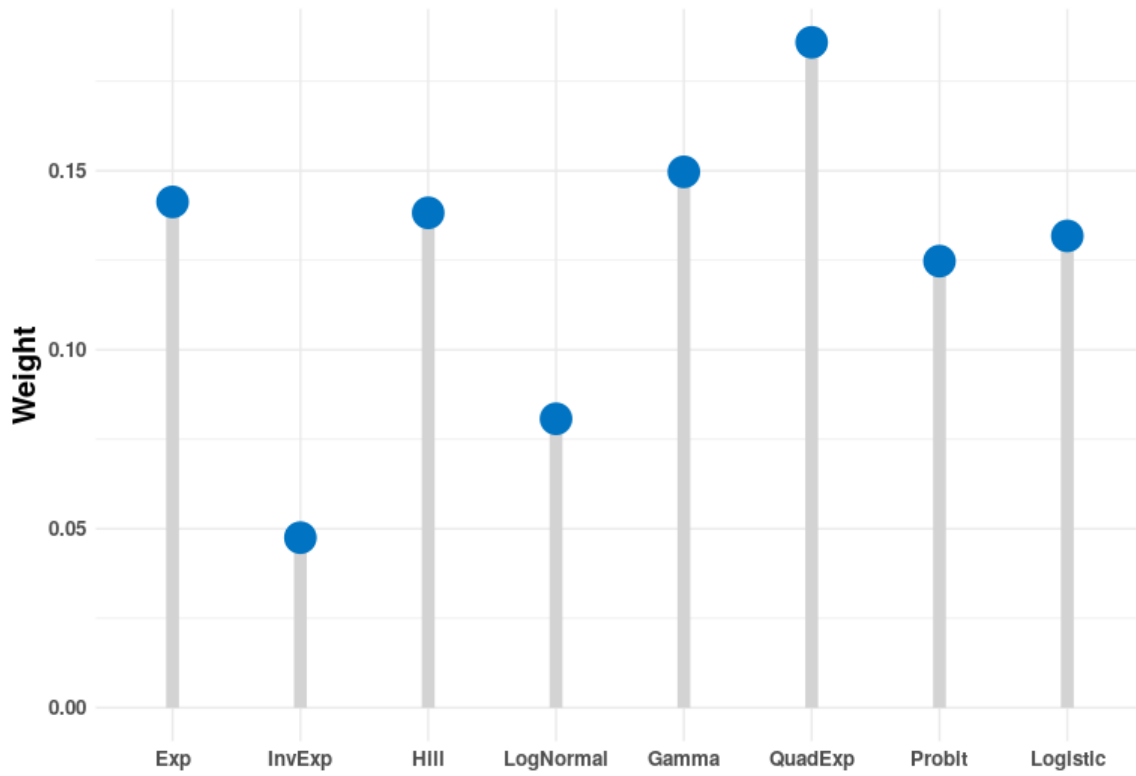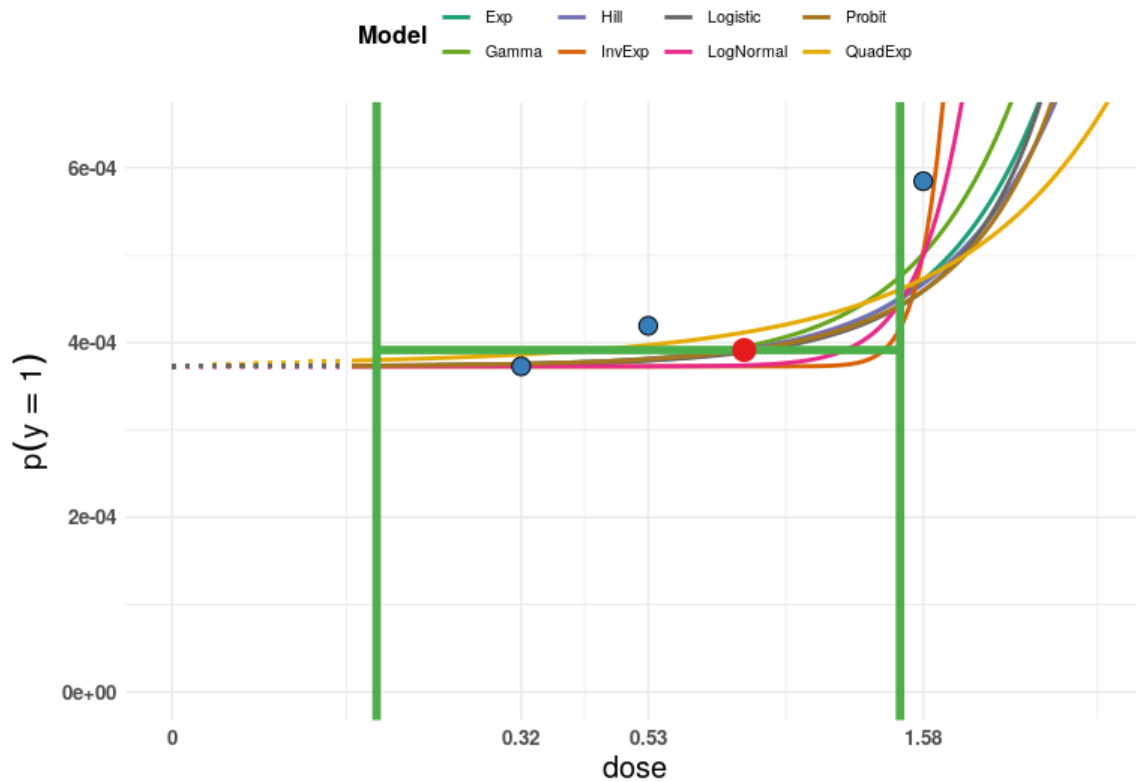

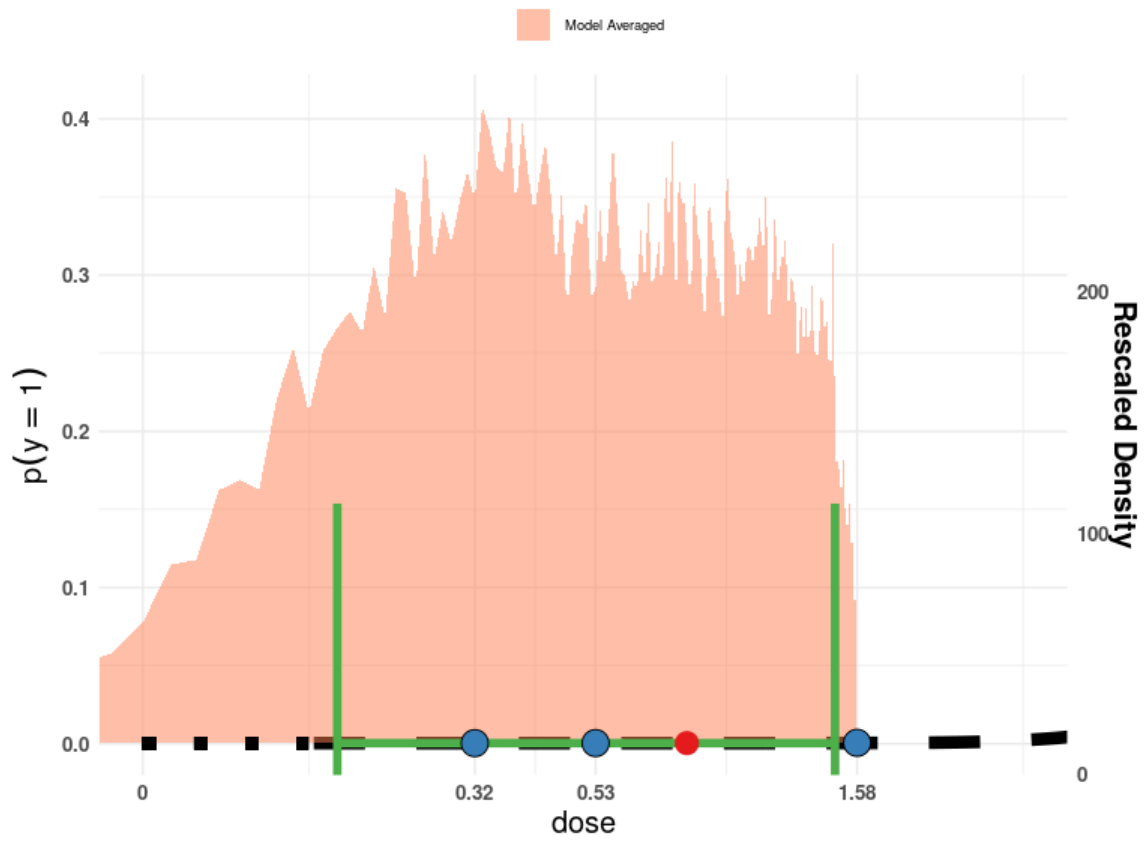



## Steinmaus et al. (2014a) lung cancer, relative BMR 5%

**Exposure: lifetime average, based on arsenic daily intakes, source population decreased by 20% (only included in the uncertainty analysis)**

### Data Description

The endpoint to be analyzed is: Adj.cases for lung cancer

Data used for analysis:

| Exposure.µg.kg.bw.per.day | Adj.cases | N     |
|---------------------------|-----------|-------|
| 0.32                      | 27        | 64375 |
| 0.53                      | 28        | 59375 |
| 1.58                      | 37        | 56250 |

The 'Value for CES' is set to 2.098e-05.

Extended dose range is not applied.

Informative background prior: min: 0.00041522; the most likely: 0.00041942; max: 0.00042361. Shape parameter is applied.

The 'Sampling Method' is set to Bridge Sampling.

### Results

*Information pertaining to this endpoint.*

#### Goodness of Fit

Best fitting model fits sufficiently well (Bayes factor is 1.92e+00).

#### Model Averaged BMD

| Model          | Type | BMDL  | BMD   | BMDU  |
|----------------|------|-------|-------|-------|
| Model Averaged | BS   | 0.179 | 0.778 | 1.458 |

#### Estimated BMDs per model

| Model | BMDL  | BMD   | BMDU  | Model Weights | Converged |
|-------|-------|-------|-------|---------------|-----------|
| E4_Q  | 0.191 | 0.787 | 1.417 | 0.141         | 1         |
| IE4_Q | 0.753 | 1.324 | 1.521 | 0.045         | 1         |
| H4_Q  | 0.173 | 0.789 | 1.418 | 0.135         | 1         |
| LN4_Q | 0.446 | 1.162 | 1.499 | 0.084         | 1         |
| G4_Q  | 0.164 | 0.713 | 1.362 | 0.143         | 1         |
| QE4_Q | 0.158 | 0.425 | 1.365 | 0.187         | 1         |
| P4_Q  | 0.199 | 0.847 | 1.485 | 0.136         | 1         |
| L4_Q  | 0.165 | 0.786 | 1.403 | 0.128         | 1         |

Plots of Fitted Models

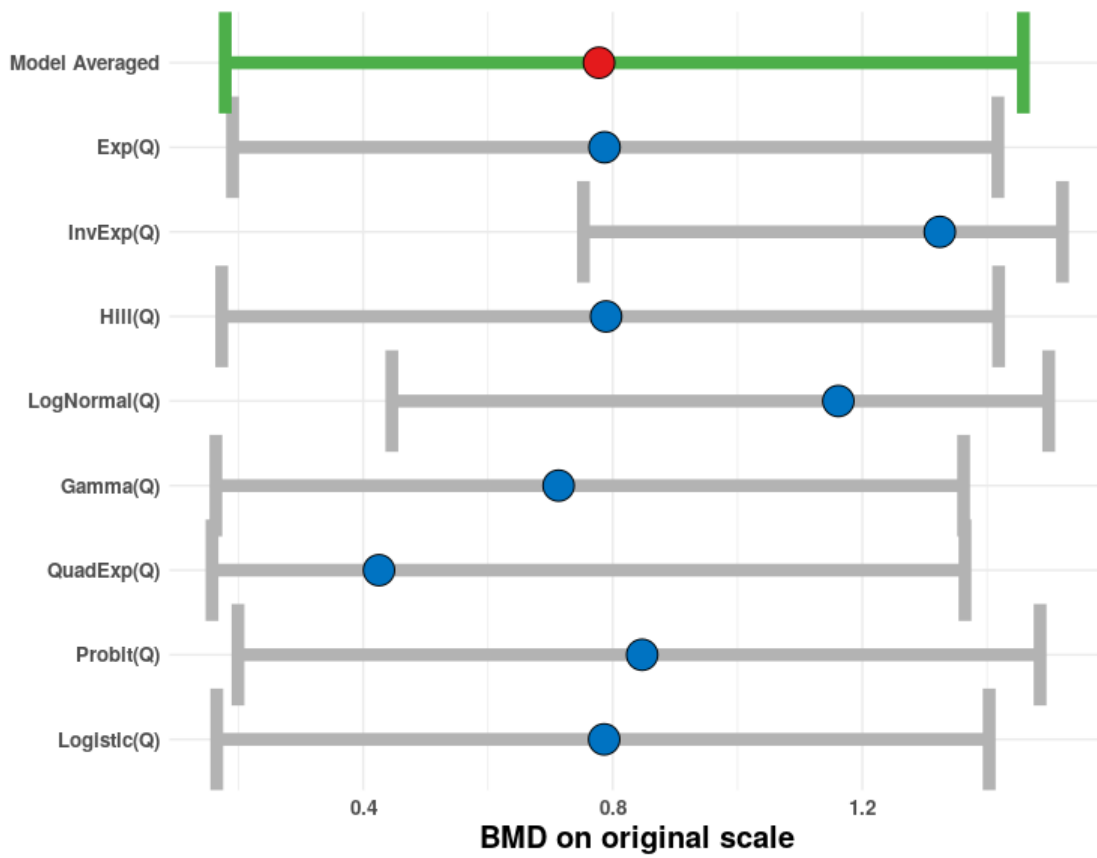

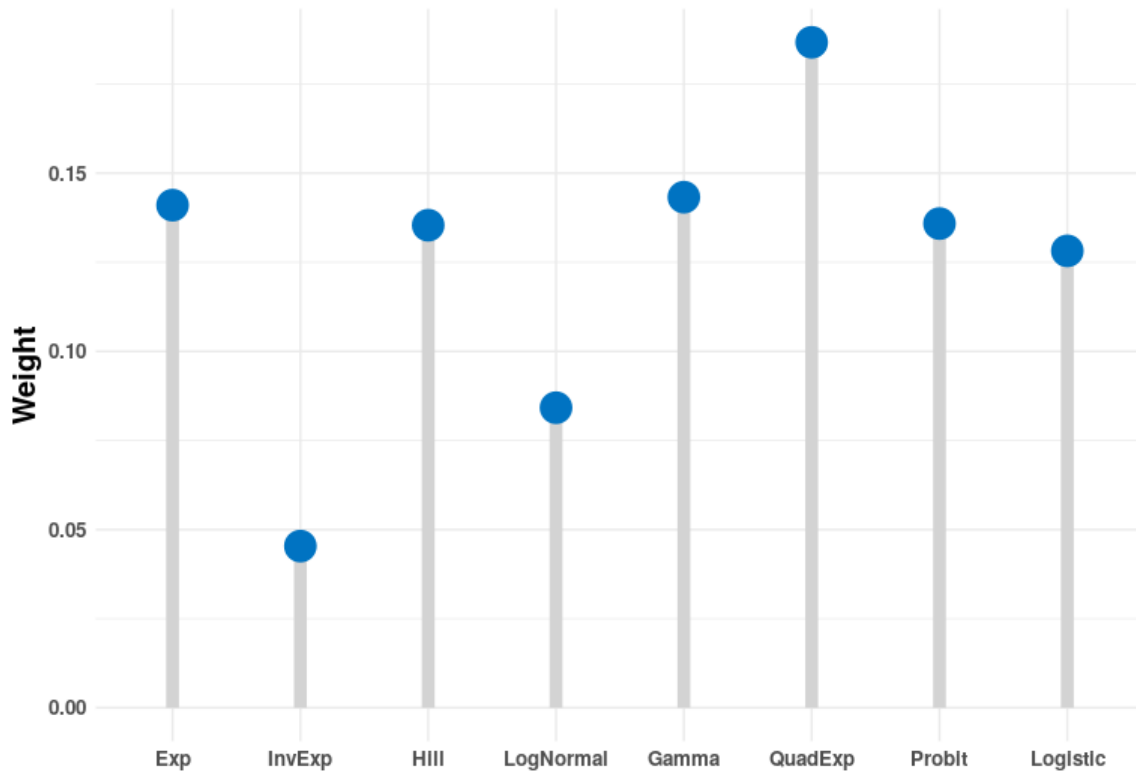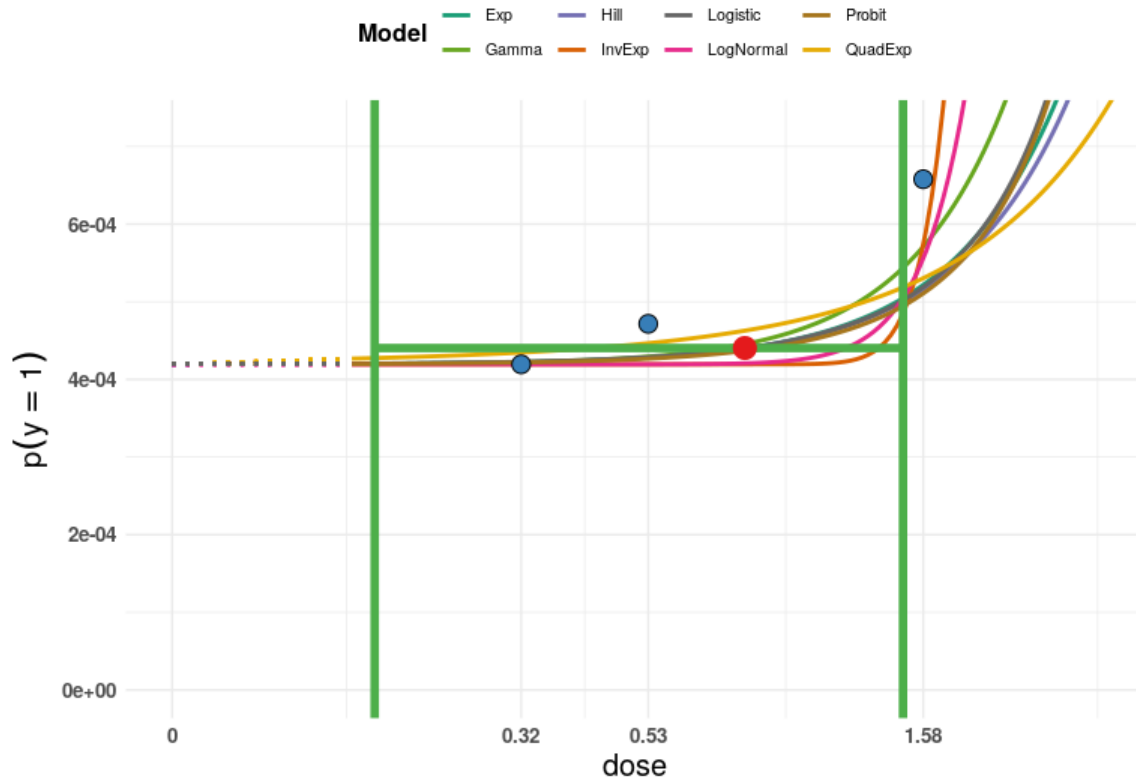

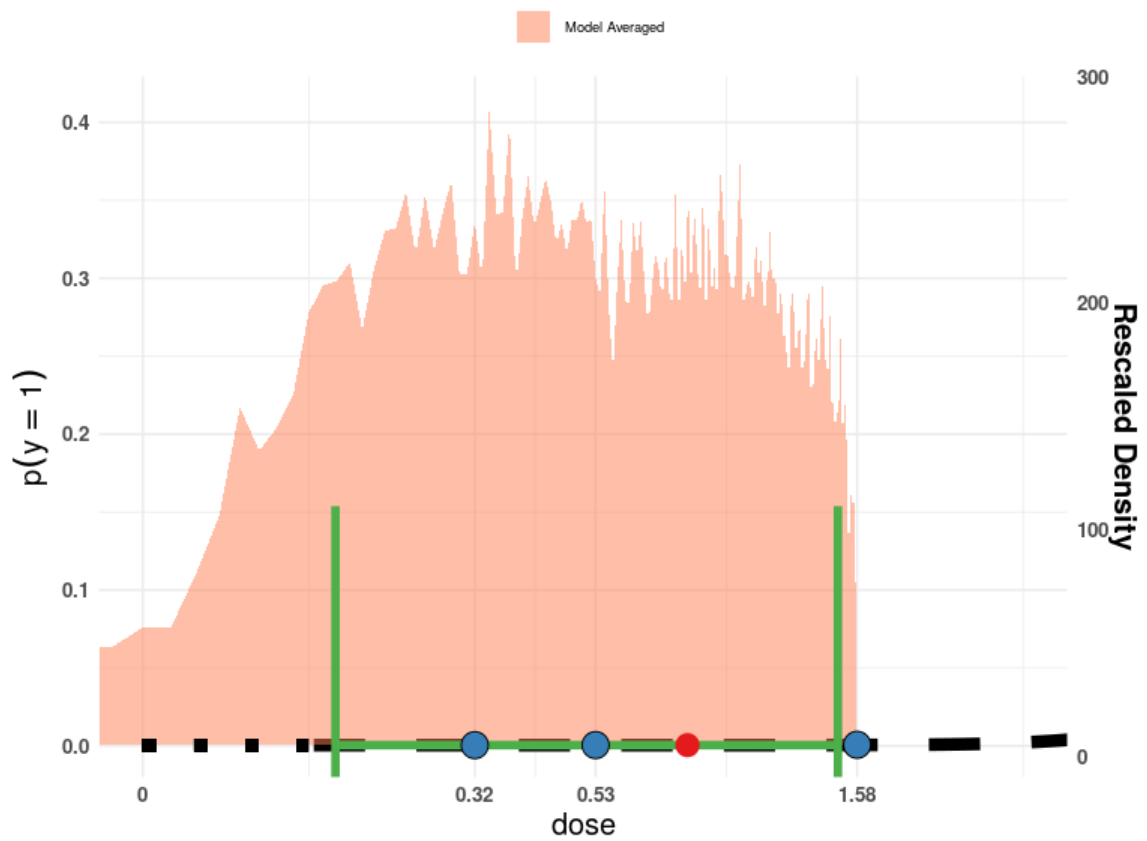

## Steinmaus et al. (2014a) lung cancer, relative BMR 5%

**Exposure: lifetime average, based on arsenic daily intakes, source population increased by 10% (only included in the uncertainty analysis)**

### Data Description

The endpoint to be analyzed is: Adj.cases for lung cancer

Data used for analysis:

| Exposure.µg.kg.bw.per.day | Adj.cases | N     |
|---------------------------|-----------|-------|
| 0.32                      | 27        | 88516 |
| 0.53                      | 28        | 81641 |
| 1.58                      | 37        | 77344 |

The 'Value for CES' is set to 1.526e-05.

Extended dose range is not applied.

Informative background prior: min: 0.00030198; the most likely: 0.00030503; max: 0.00030808. Shape parameter is applied.

The 'Sampling Method' is set to Bridge Sampling.

### Results

*Information pertaining to this endpoint.*

#### Goodness of Fit

Best fitting model fits sufficiently well (Bayes factor is 1.73e+00).

#### Model Averaged BMD

| Model          | Type | BMDL  | BMD   | BMDU  |
|----------------|------|-------|-------|-------|
| Model Averaged | BS   | 0.154 | 0.715 | 1.441 |

#### Estimated BMDs per model

| Model | BMDL  | BMD   | BMDU  | Model Weights | Converged |
|-------|-------|-------|-------|---------------|-----------|
| E4_Q  | 0.182 | 0.800 | 1.422 | 0.147         | 1         |
| IE4_Q | 0.759 | 1.345 | 1.532 | 0.045         | 1         |
| H4_Q  | 0.189 | 0.755 | 1.381 | 0.135         | 1         |
| LN4_Q | 0.452 | 1.153 | 1.486 | 0.083         | 1         |
| G4_Q  | 0.103 | 0.323 | 1.135 | 0.133         | 0         |
| QE4_Q | 0.155 | 0.410 | 1.342 | 0.190         | 1         |
| P4_Q  | 0.214 | 0.817 | 1.399 | 0.128         | 1         |
| L4_Q  | 0.188 | 0.824 | 1.435 | 0.139         | 1         |

**Plots of Fitted Models**

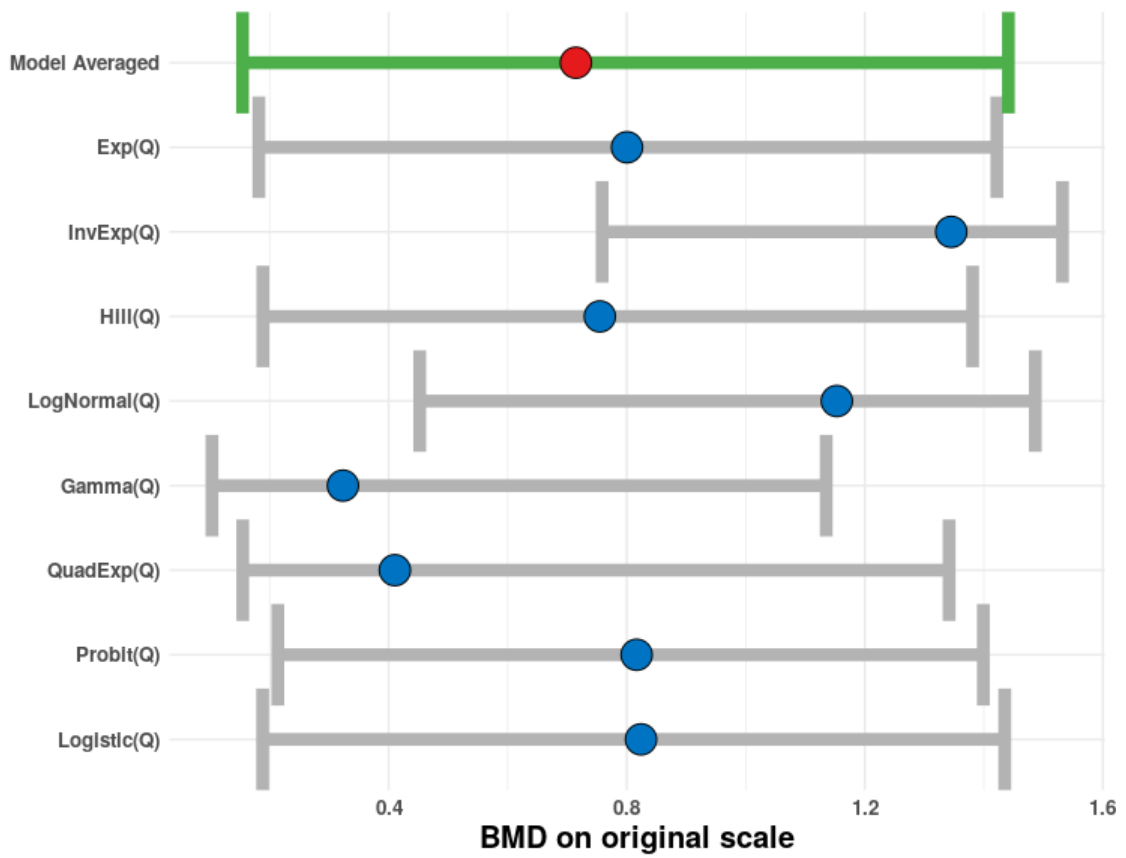

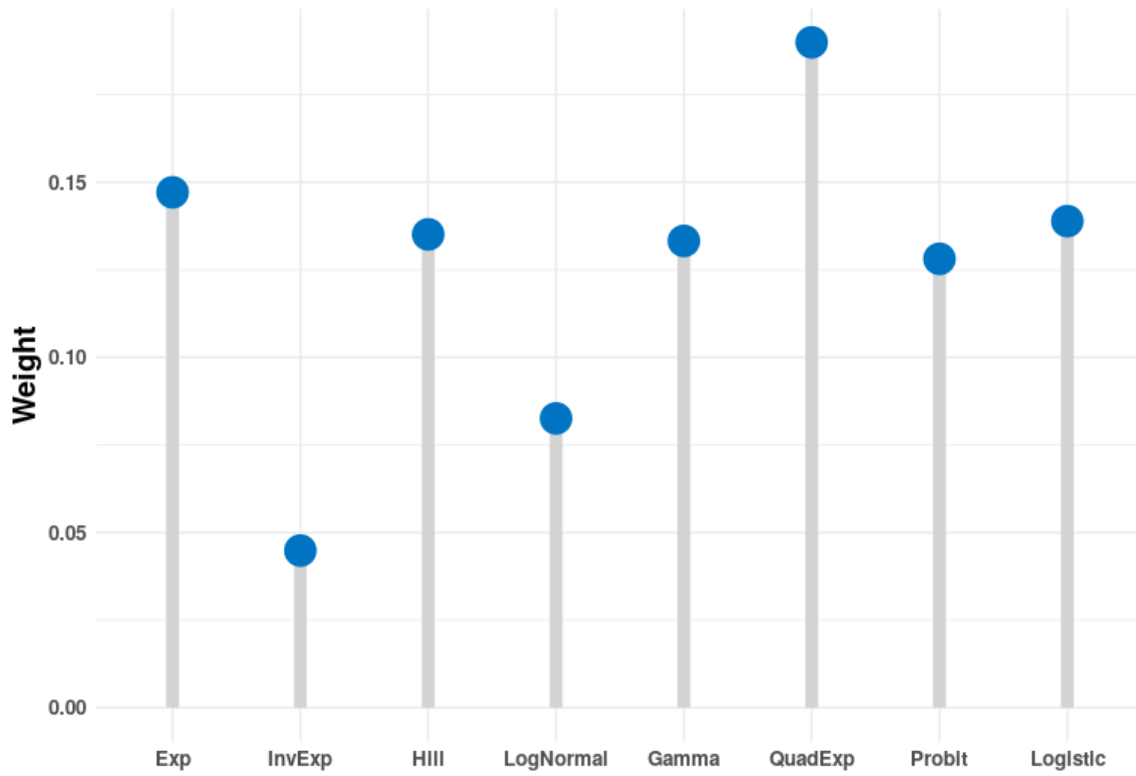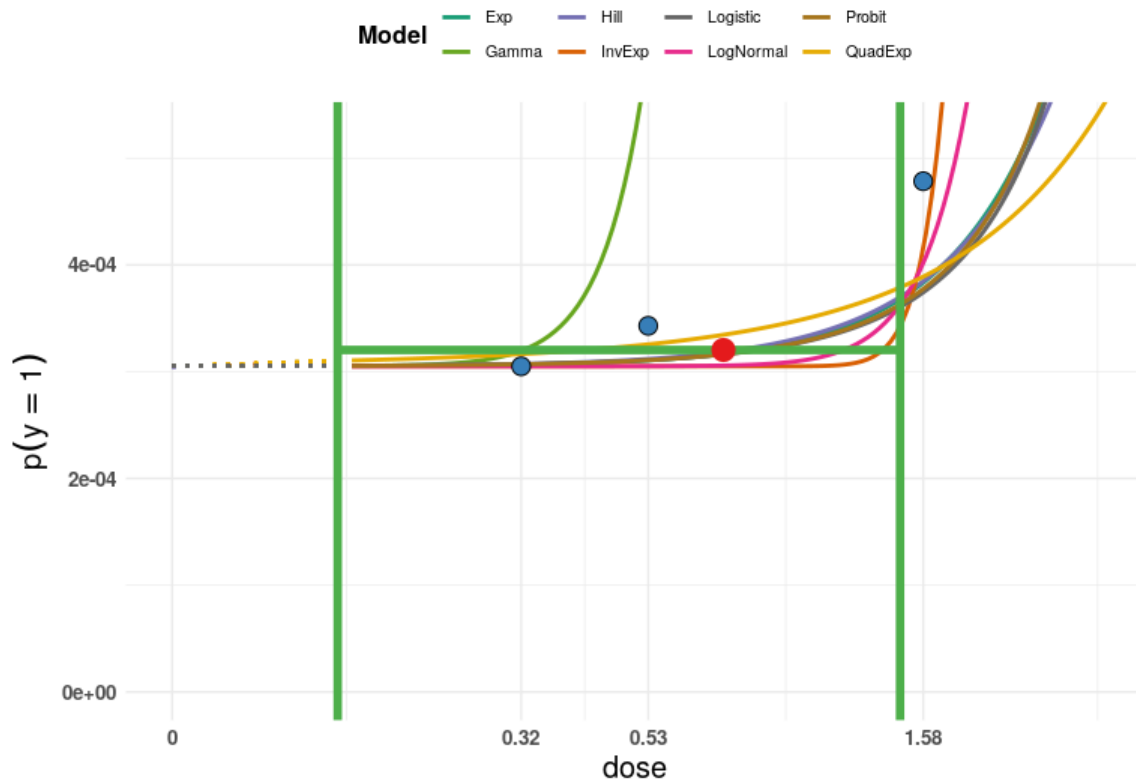

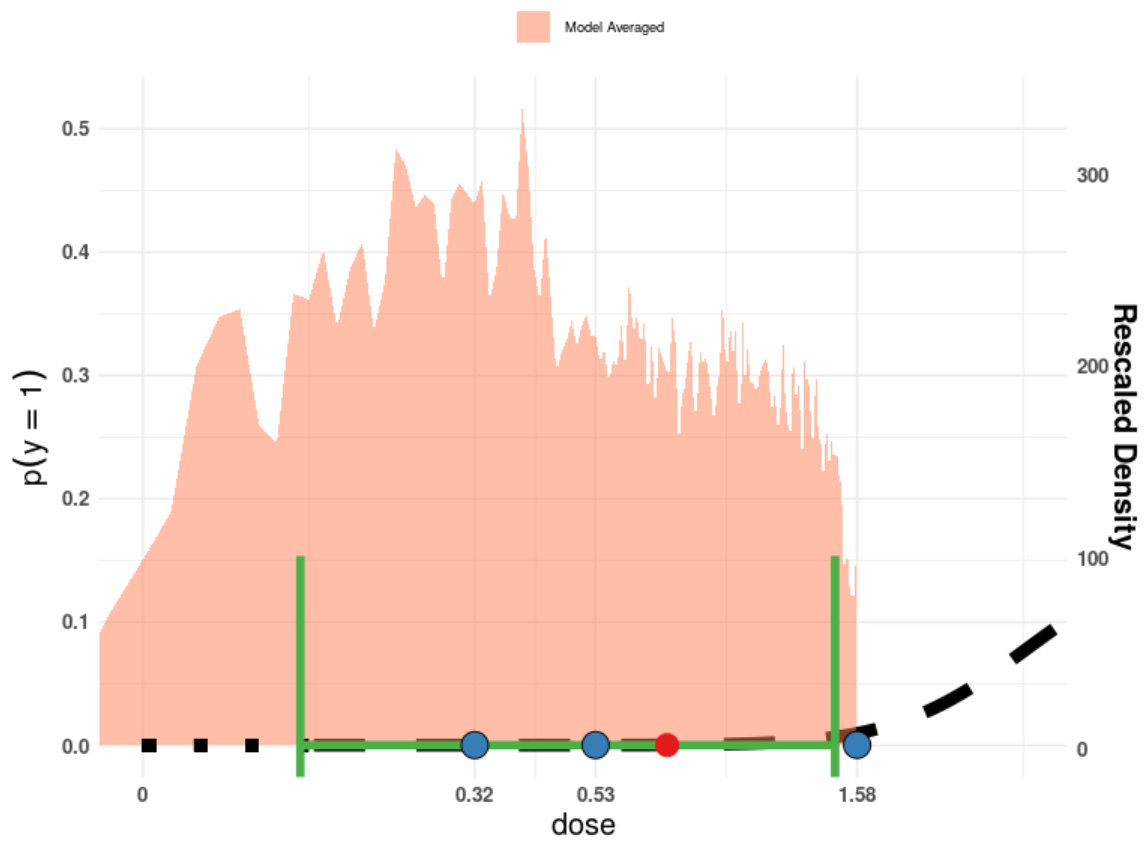



## Steinmaus et al. (2014a) lung cancer, relative BMR 5%

**Exposure: lifetime average, based on arsenic daily intakes, source population increased by 20% (only included in the uncertainty analysis)**

### Data Description

The endpoint to be analyzed is: Adj.cases for lung cancer

Data used for analysis:

| Exposure.µg.kg.bw.per.day | Adj.cases | N     |
|---------------------------|-----------|-------|
| 0.32                      | 27        | 96563 |
| 0.53                      | 28        | 89063 |
| 1.58                      | 37        | 84375 |

The 'Value for CES' is set to 1.398e-05.

Extended dose range is not applied.

Informative background prior: min: 0.00027681; the most likely: 0.00027961; max: 0.00028241. Shape parameter is applied.

The 'Sampling Method' is set to Bridge Sampling.

### Results

*Information pertaining to this endpoint.*

#### Goodness of Fit

Best fitting model fits sufficiently well (Bayes factor is 1.69e+00).

#### Model Averaged BMD

| Model          | Type | BMDL | BMD   | BMDU  |
|----------------|------|------|-------|-------|
| Model Averaged | BS   | 0.16 | 0.695 | 1.435 |

#### Estimated BMDs per model

| Model | BMDL  | BMD   | BMDU  | Model Weights | Converged |
|-------|-------|-------|-------|---------------|-----------|
| E4_Q  | 0.184 | 0.757 | 1.398 | 0.144         | 1         |
| IE4_Q | 0.737 | 1.324 | 1.527 | 0.045         | 1         |
| H4_Q  | 0.179 | 0.772 | 1.416 | 0.138         | 1         |
| LN4_Q | 0.510 | 1.169 | 1.503 | 0.086         | 1         |
| G4_Q  | 0.106 | 0.379 | 1.113 | 0.133         | 0         |
| QE4_Q | 0.156 | 0.407 | 1.294 | 0.190         | 1         |
| P4_Q  | 0.176 | 0.821 | 1.448 | 0.129         | 1         |
| L4_Q  | 0.170 | 0.795 | 1.379 | 0.134         | 1         |

**Plots of Fitted Models**

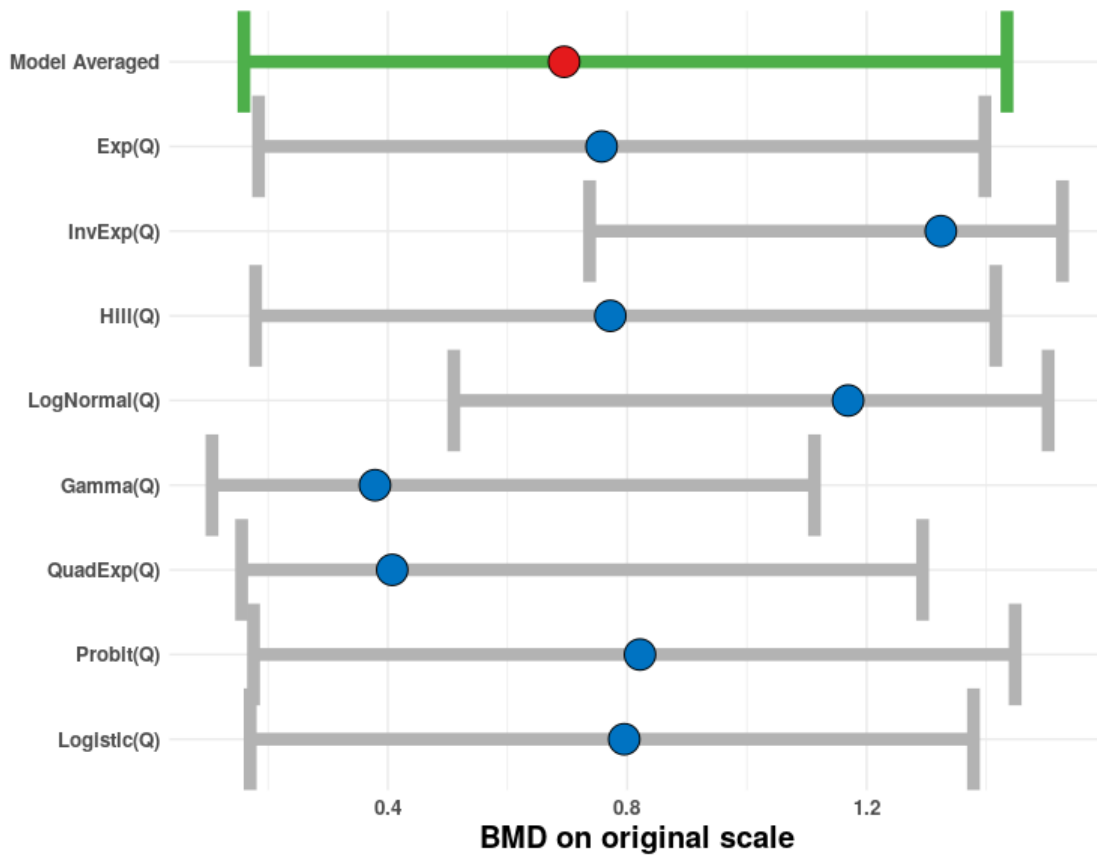

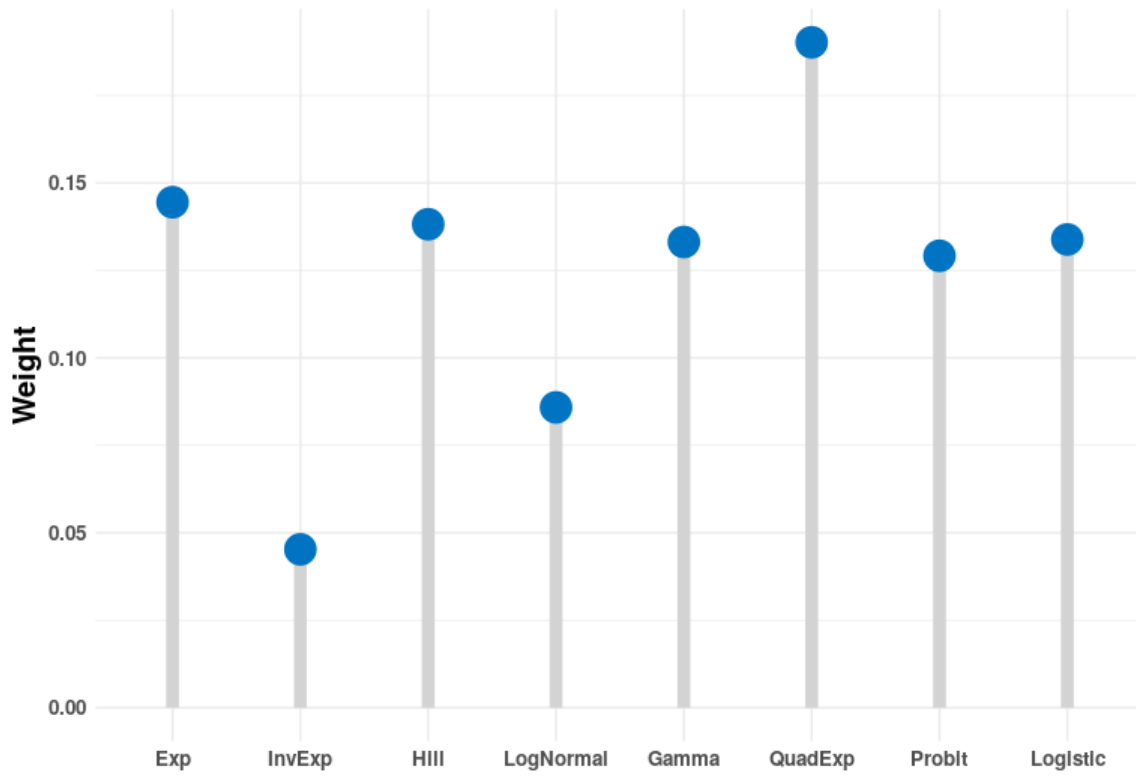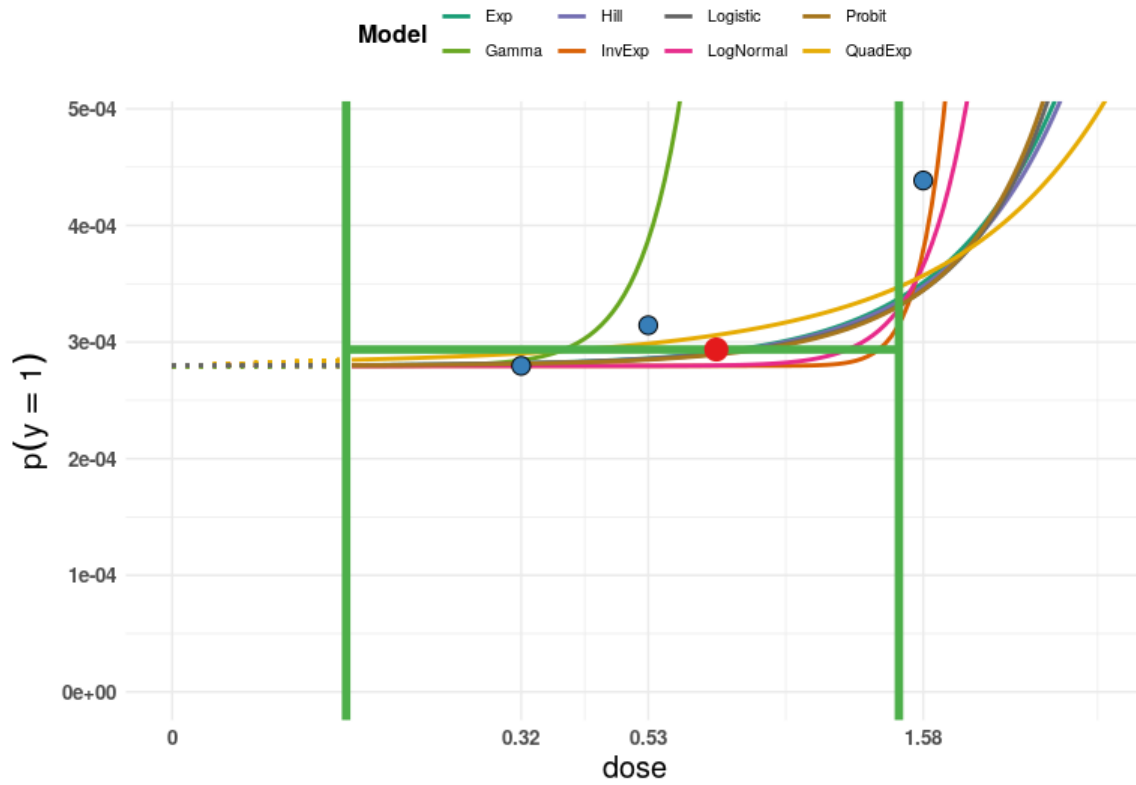

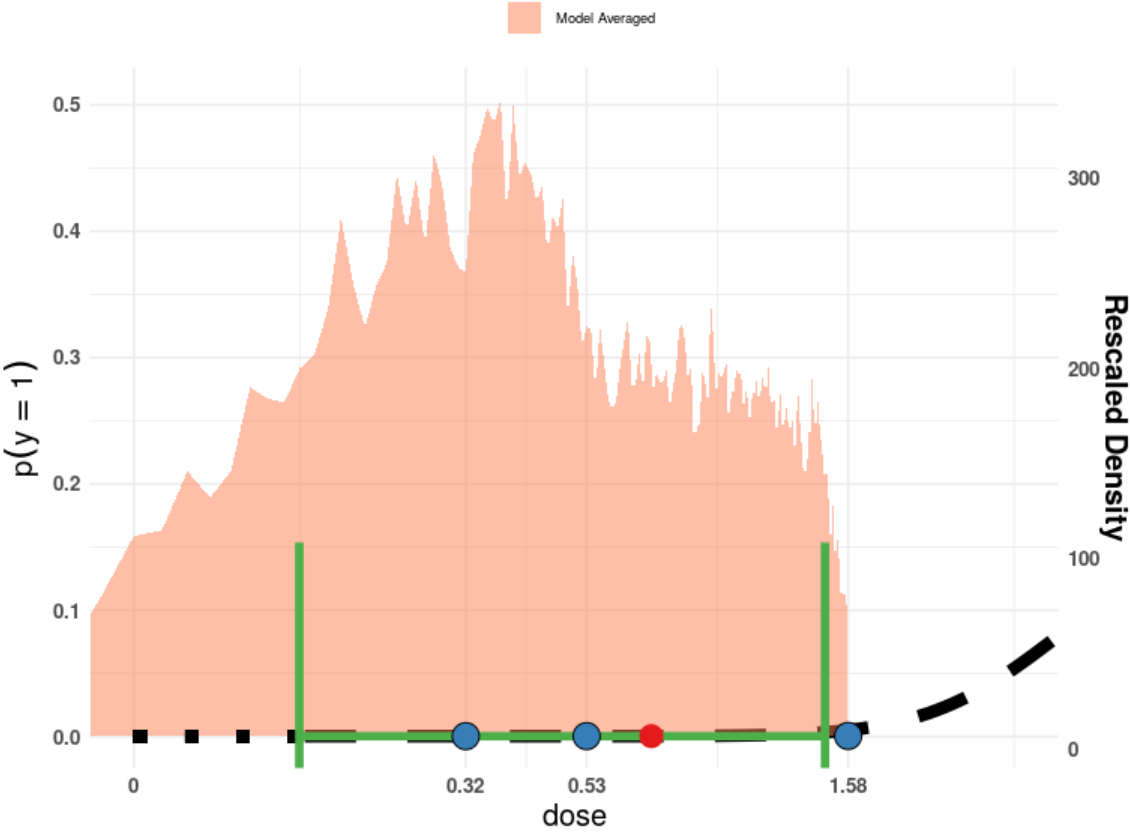

## Steinmaus et al. (2014a) lung cancer, relative BMR 5%

**Exposure: the highest 5-year average, based on arsenic daily intakes (the preferred exposure estimate for the study)**

### Data Description

The endpoint to be analyzed is: Adj.cases for lung cancer

Data used for analysis:

| Exposure.µg.kg.bw.per.day | Adj.cases | N     |
|---------------------------|-----------|-------|
| 0.36                      | 25        | 79688 |
| 0.70                      | 30        | 77344 |
| 2.00                      | 37        | 67969 |

The 'Value for CES' is set to 1.569e-05.

Extended dose range is not applied.

Informative background prior: min: 0.00031059; the most likely: 0.00031372; max: 0.00031686. Shape parameter is applied.

The 'Sampling Method' is set to Bridge Sampling.

### Results

*Information pertaining to this endpoint.*

#### Goodness of Fit

Best fitting model fits sufficiently well (Bayes factor is 1.50e+00).

#### Model Averaged BMD

| Model          | Type | BMDL  | BMD   | BMDU  |
|----------------|------|-------|-------|-------|
| Model Averaged | BS   | 0.165 | 0.764 | 1.714 |

#### Estimated BMDs per model

| Model | BMDL  | BMD   | BMDU  | Model Weights | Converged |
|-------|-------|-------|-------|---------------|-----------|
| E4_Q  | 0.165 | 0.789 | 1.655 | 0.145         | 1         |
| IE4_Q | 0.839 | 1.612 | 1.874 | 0.048         | 1         |
| H4_Q  | 0.176 | 0.798 | 1.619 | 0.145         | 1         |
| LN4_Q | 0.419 | 1.309 | 1.770 | 0.087         | 1         |
| G4_Q  | 0.201 | 0.927 | 1.671 | 0.121         | 0         |
| QE4_Q | 0.137 | 0.322 | 1.146 | 0.203         | 1         |
| P4_Q  | 0.178 | 0.780 | 1.602 | 0.123         | 1         |
| L4_Q  | 0.167 | 0.788 | 1.599 | 0.127         | 1         |

**Plots of Fitted Models**

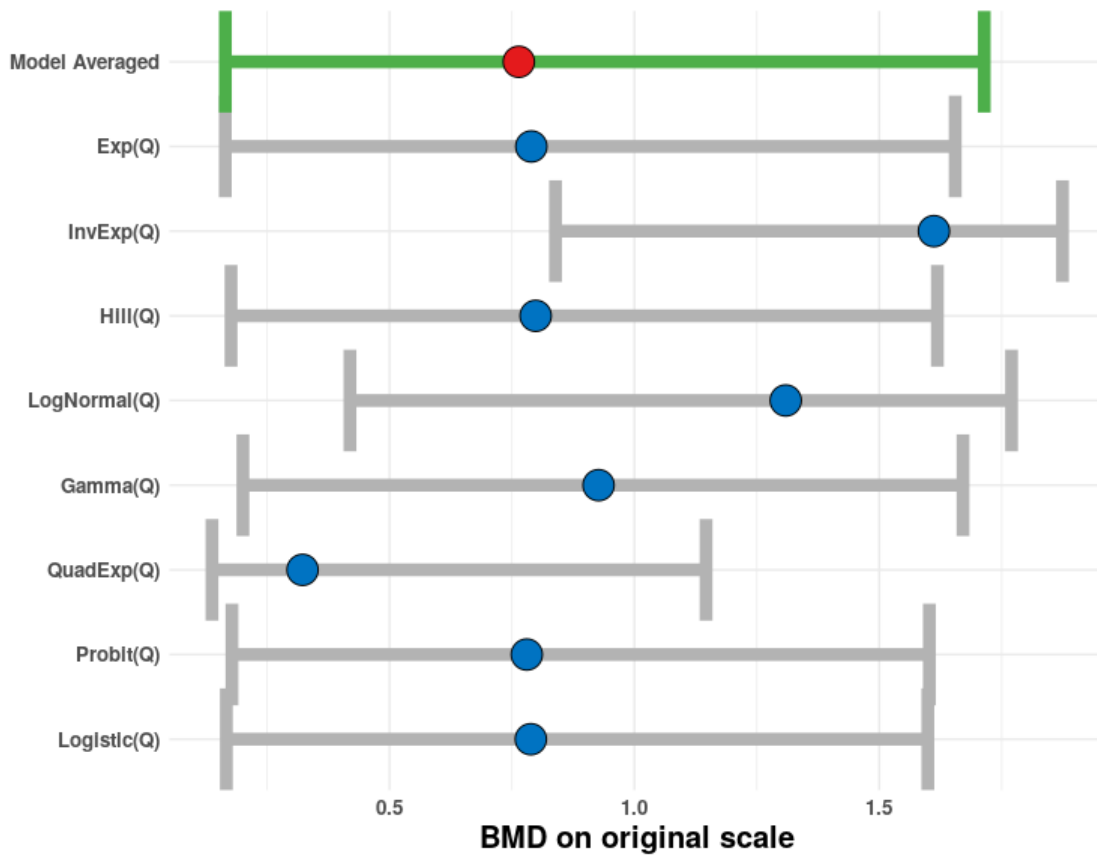

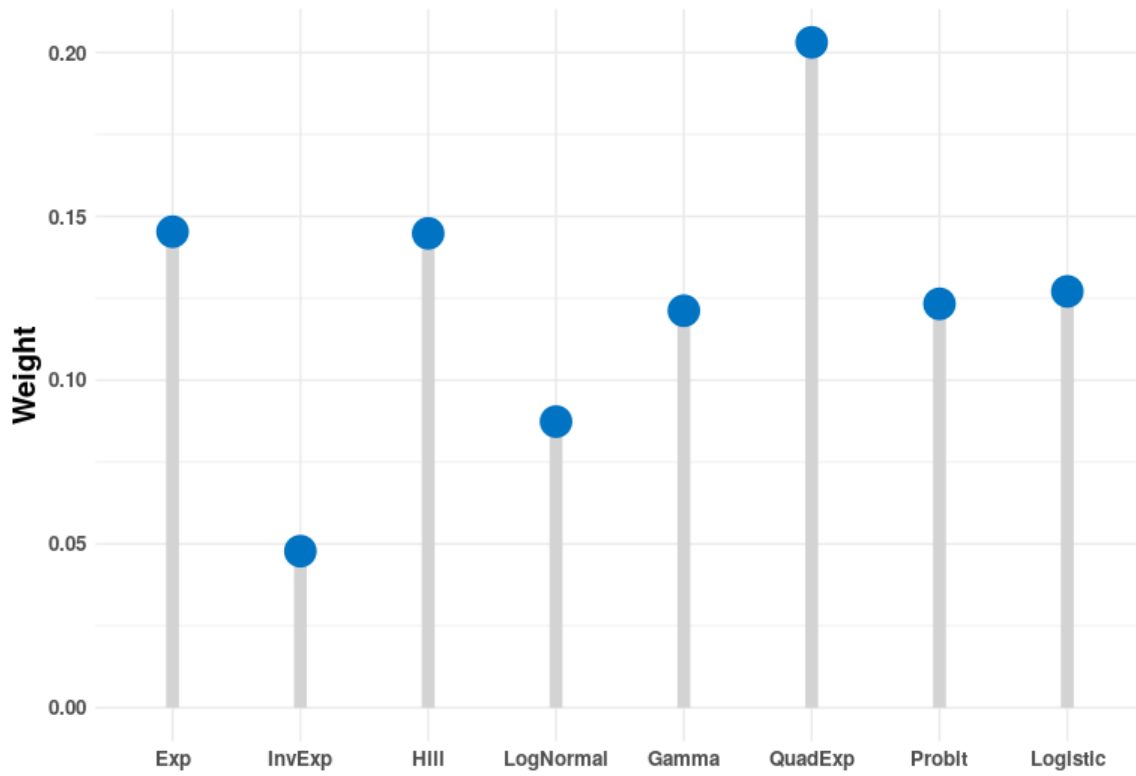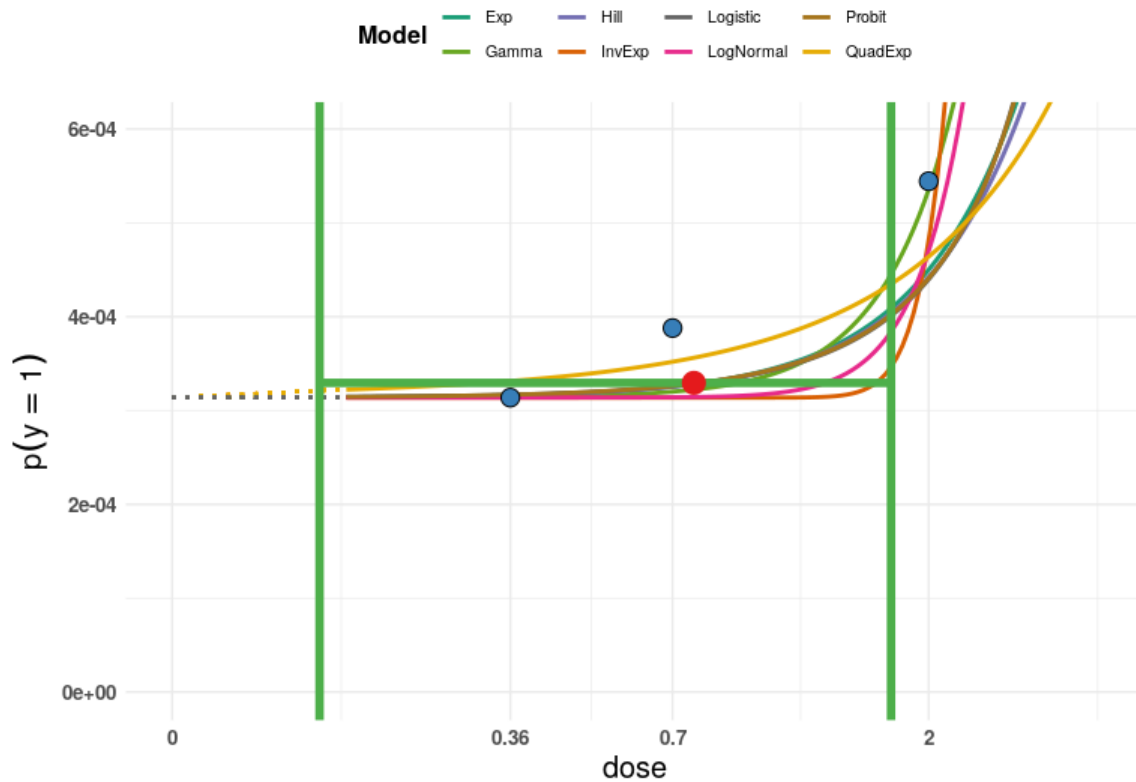

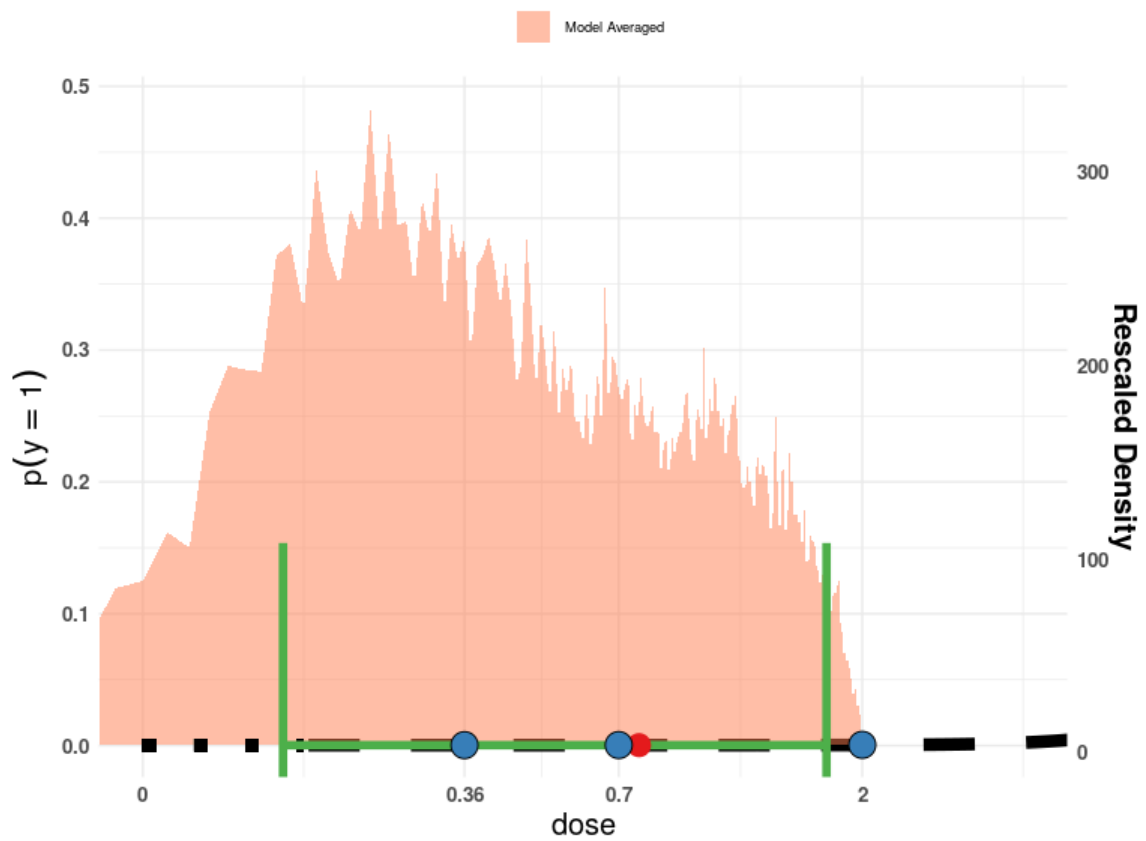



## Steinmaus et al. (2014a) lung cancer, relative BMR 5%

**Exposure: the highest single year, based on arsenic daily intakes (only included in the uncertainty analysis)**

### Data Description

The endpoint to be analyzed is: Adj.cases for lung cancer

Data used for analysis:

| Exposure.µg.kg.bw.per.day | Adj.cases | N     |
|---------------------------|-----------|-------|
| 0.39                      | 23        | 80469 |
| 0.84                      | 31        | 76563 |
| 1.19                      | 38        | 67969 |

The 'Value for CES' is set to 1.43e-05.

Extended dose range is not applied.

Informative background prior: min: 0.00028297; the most likely: 0.00028582; max: 0.00028868. Shape parameter is applied.

The 'Sampling Method' is set to Bridge Sampling.

### Results

*Information pertaining to this endpoint.*

### Goodness of Fit

Best fitting model fits sufficiently well (Bayes factor is 1.10e+00).

### Model Averaged BMD

| Model          | Type | BMDL  | BMD   | BMDU  |
|----------------|------|-------|-------|-------|
| Model Averaged | BS   | 0.107 | 0.413 | 0.849 |

### Estimated BMDs per model

| Model | BMDL  | BMD   | BMDU  | Model Weights | Converged |
|-------|-------|-------|-------|---------------|-----------|
| E4_Q  | 0.136 | 0.424 | 0.783 | 0.152         | 1         |
| IE4_Q | 0.377 | 0.783 | 1.064 | 0.038         | 1         |
| H4_Q  | 0.135 | 0.427 | 0.791 | 0.154         | 1         |
| LN4_Q | 0.260 | 0.602 | 0.951 | 0.089         | 1         |
| G4_Q  | 0.134 | 0.436 | 0.741 | 0.155         | 1         |
| QE4_Q | 0.079 | 0.166 | 0.361 | 0.150         | 1         |
| P4_Q  | 0.125 | 0.441 | 0.881 | 0.132         | 1         |
| L4_Q  | 0.114 | 0.427 | 0.789 | 0.130         | 1         |

**Plots of Fitted Models**

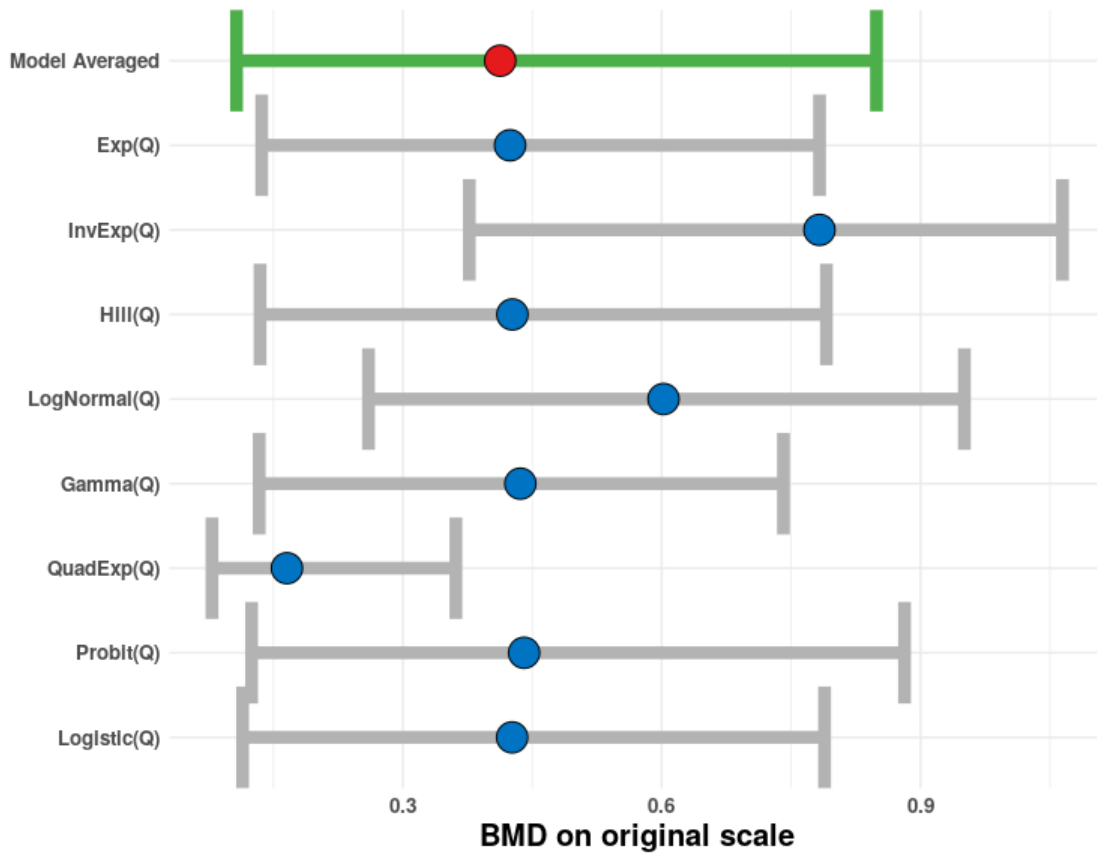

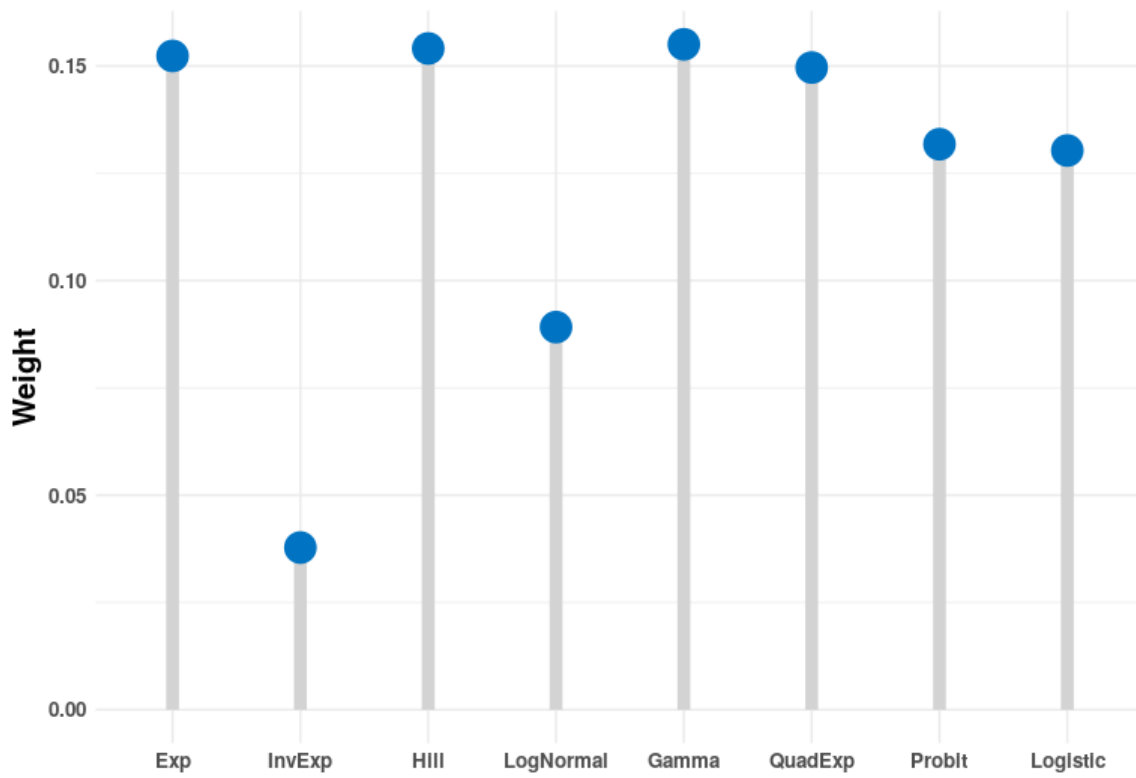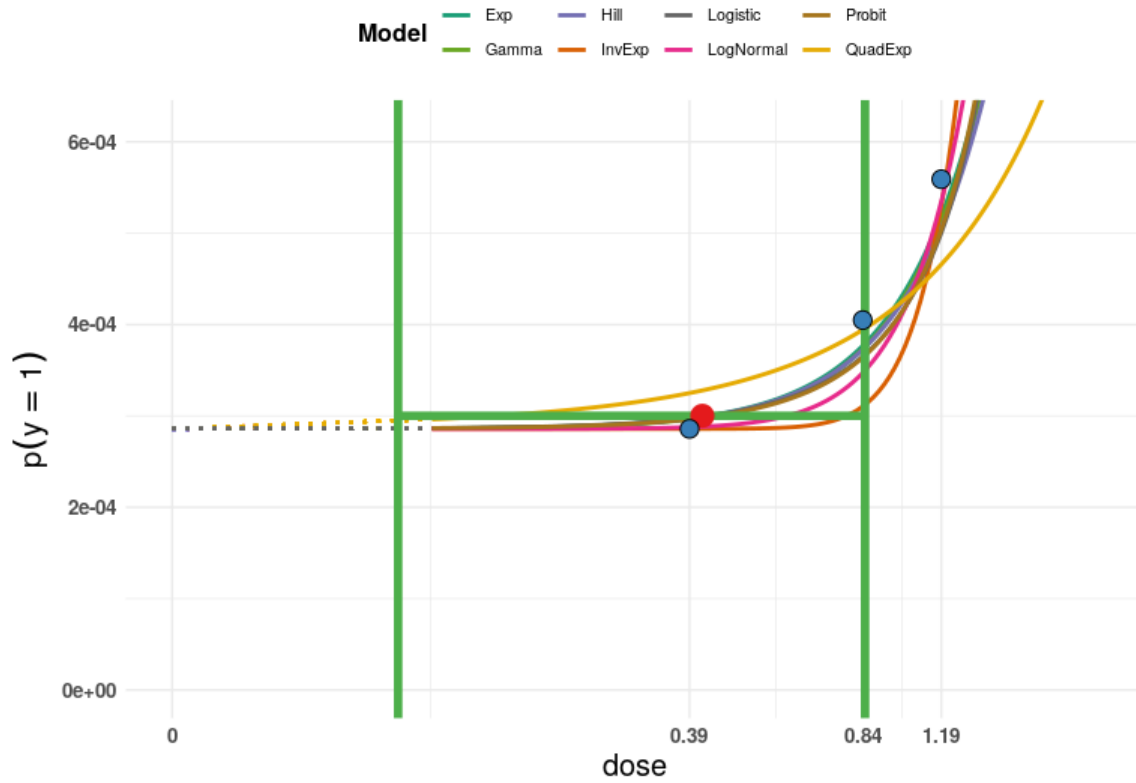

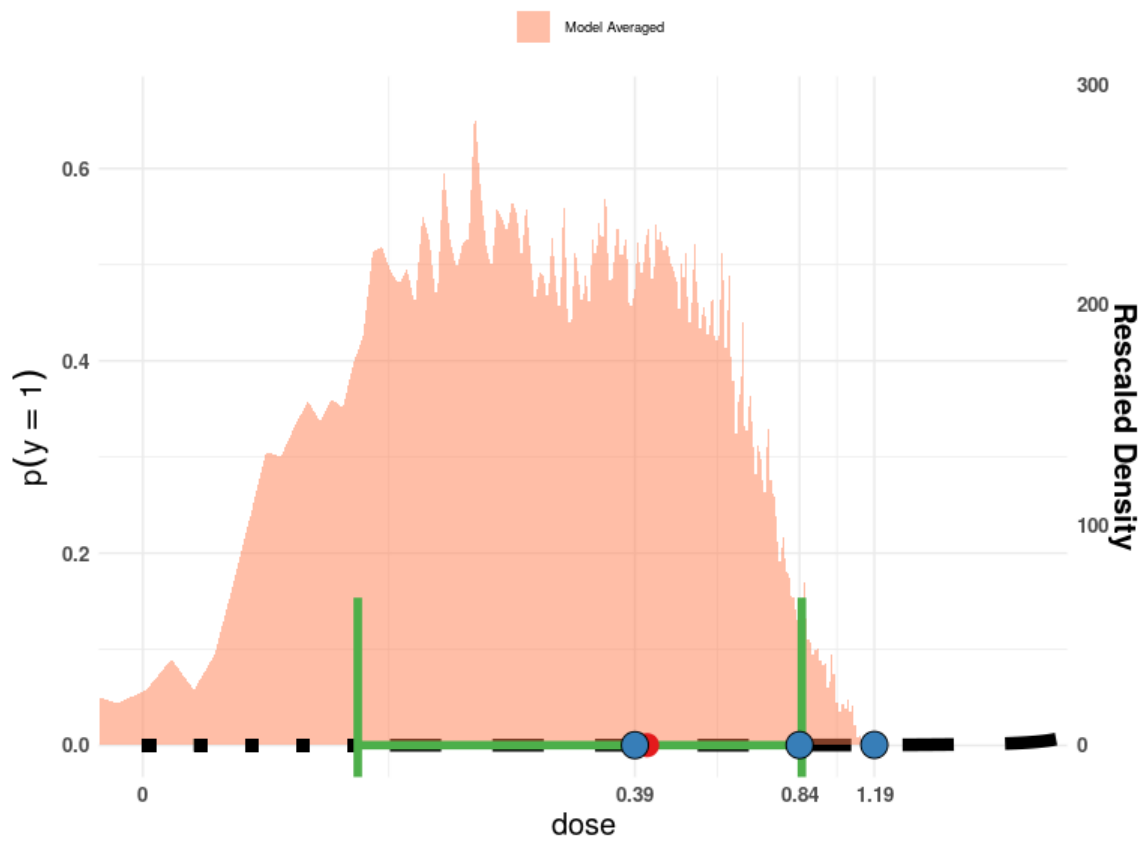

## Vahter et al. (2020) full developmental score, mothers u-tiAs at GW 8, BMR 5%

### Data Description

The endpoint to be analyzed is: Full.development.score

Data used for analysis:

| Exposure | Full.development.score | SD | N   |
|----------|------------------------|----|-----|
| 1.53     | 141                    | 34 | 294 |
| 1.89     | 135                    | 33 | 293 |
| 2.47     | 126                    | 34 | 294 |
| 4.62     | 127                    | 31 | 293 |
| 7.02     | 132                    | 31 | 293 |

The 'Value for CES' is set to 0.05.

Extended dose range is applied.

Informative background prior: min: 127; the most likely: 141; max: 155. Shape parameter is applied.

The 'Sampling Method' is set to Bridge Sampling.

### Results

*Information pertaining to this endpoint.*

#### Check for constant variance coefficient of variation

Distributional assumption of constant variance is met, Bartlett test p-value is 0.2801

Distributional assumption of constant variance (on log-scale) is met, Bartlett test p-value is 0.1741

#### Goodness of Fit

Best fitting model fits sufficiently well (Bayes factor is 1.55e+00).

**Model Averaged BMD**

| Model          | Type | BMDL  | BMD   | BMDU  |
|----------------|------|-------|-------|-------|
| Model Averaged | BS   | 1.364 | 1.806 | 2.118 |

**Estimated BMDs per model**

| Model  | BMDL  | BMD   | BMDU   | Model Weights | Converged |
|--------|-------|-------|--------|---------------|-----------|
| E4_N   | 1.474 | 1.853 | 2.174  | 0.000         | 1         |
| IE4_N  | 1.515 | 1.882 | 2.228  | 0.000         | 1         |
| H4_N   | 1.503 | 1.859 | 2.212  | 0.000         | 1         |
| LN4_N  | 1.475 | 1.866 | 2.177  | 0.000         | 1         |
| G4_N   | 1.372 | 1.910 | 46.277 | 0.000         | 0         |
| QE4_N  | 0.659 | 1.193 | 4.652  | 0.000         | 1         |
| P4_N   | 1.454 | 1.849 | 2.181  | 0.000         | 1         |
| L4_N   | 1.483 | 1.869 | 2.191  | 0.000         | 1         |
| E4_LN  | 1.337 | 1.794 | 2.133  | 0.207         | 1         |
| IE4_LN | 1.446 | 1.844 | 2.126  | 0.086         | 1         |
| H4_LN  | 1.412 | 1.804 | 2.120  | 0.081         | 1         |
| LN4_LN | 1.448 | 1.844 | 2.120  | 0.163         | 1         |
| G4_LN  | 1.301 | 1.517 | 1.924  | 0.007         | 0         |
| QE4_LN | 0.508 | 0.897 | 2.116  | 0.000         | 1         |
| P4_LN  | 1.365 | 1.801 | 2.114  | 0.235         | 1         |
| L4_LN  | 1.329 | 1.782 | 2.105  | 0.221         | 1         |

**Plots of Fitted Models**

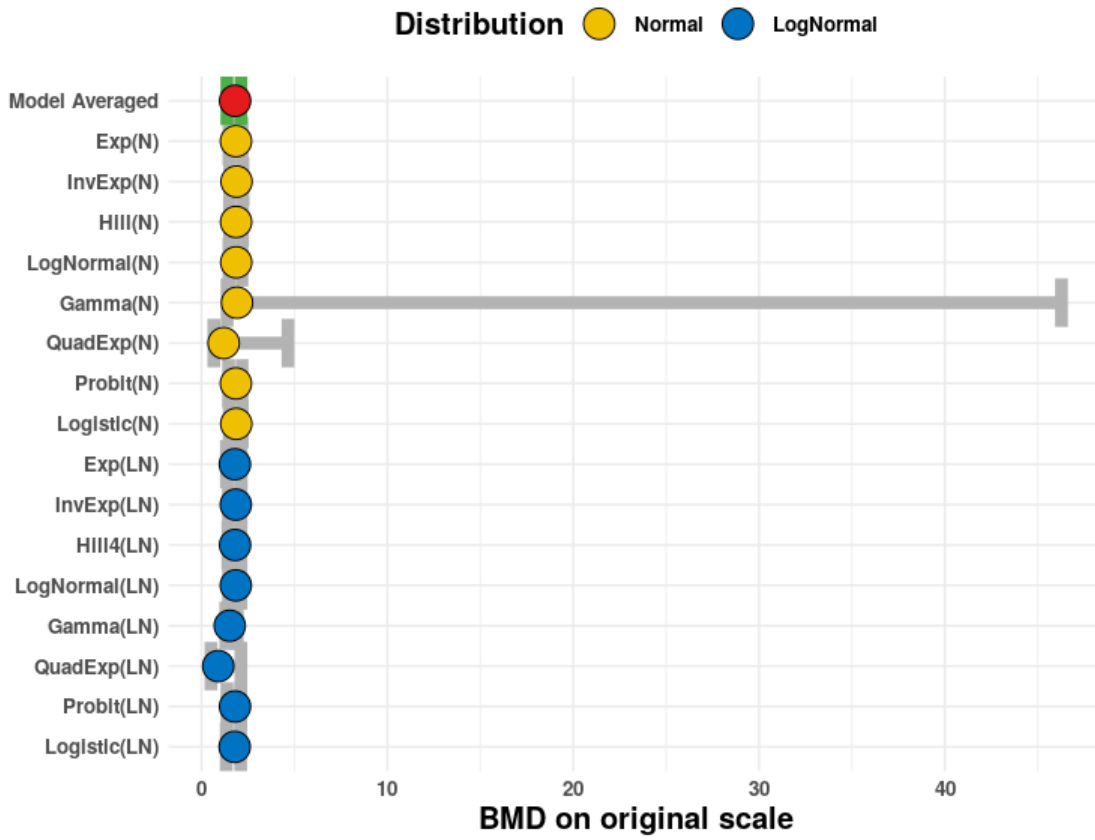

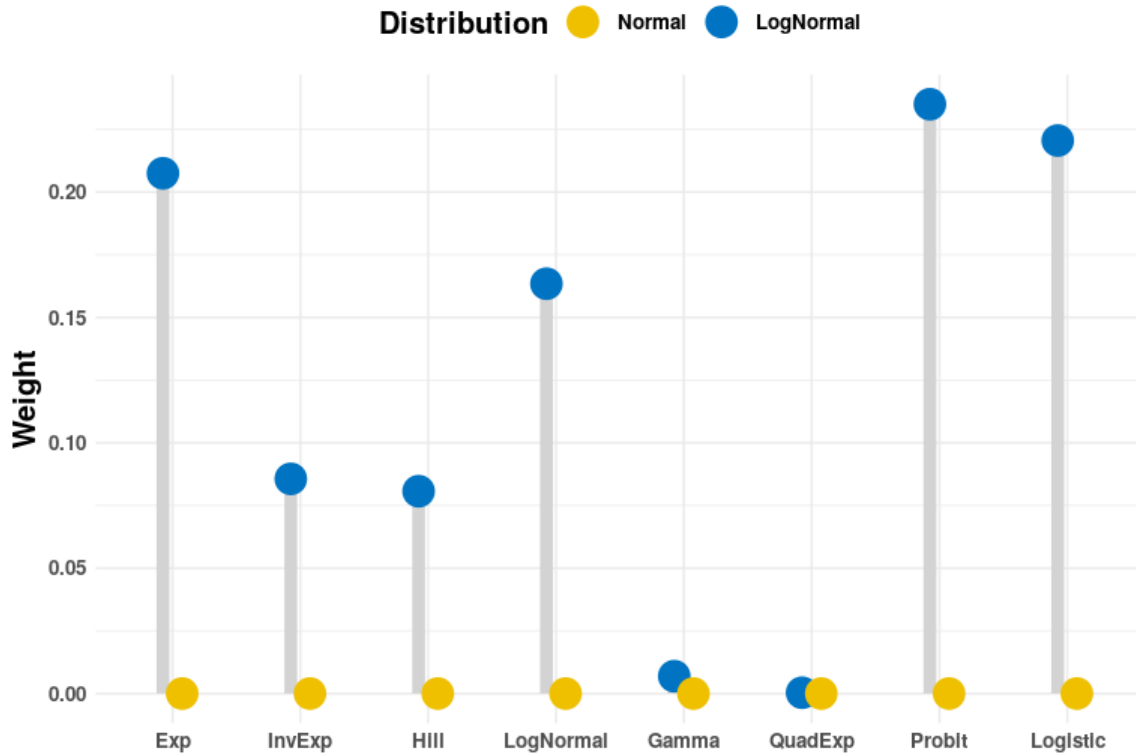

### Normal distribution

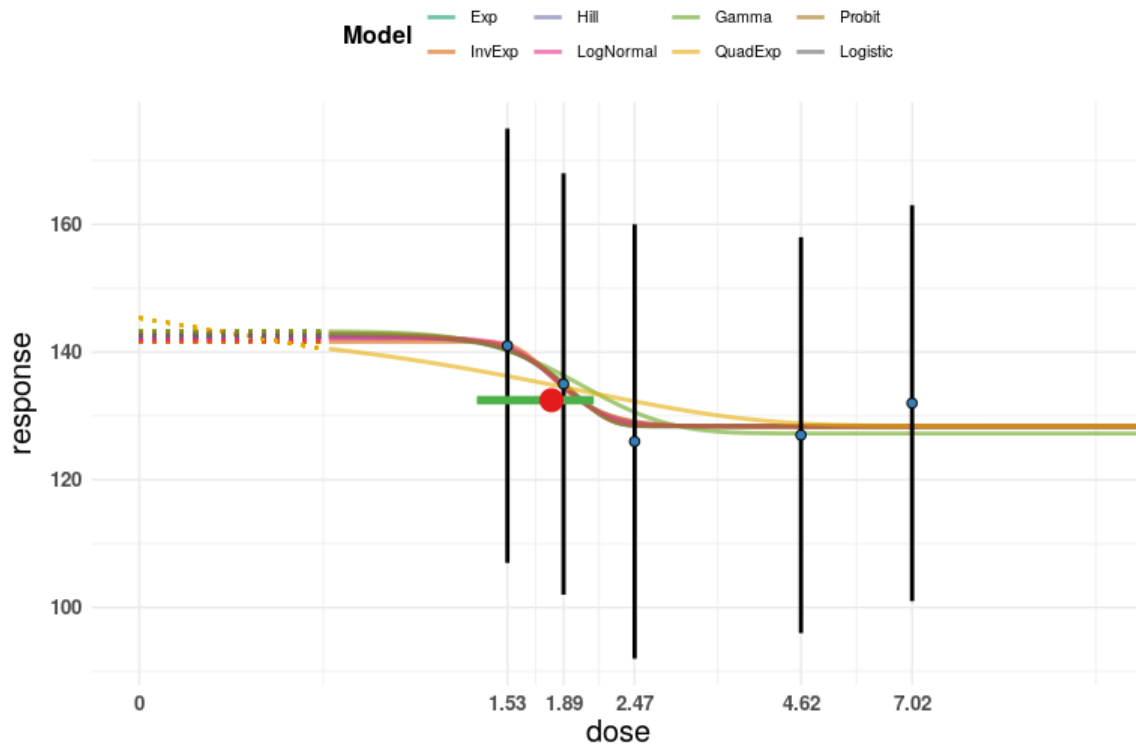

data and vertical bars based on arithmetic sample means and standard deviations



### LogNormal distribution

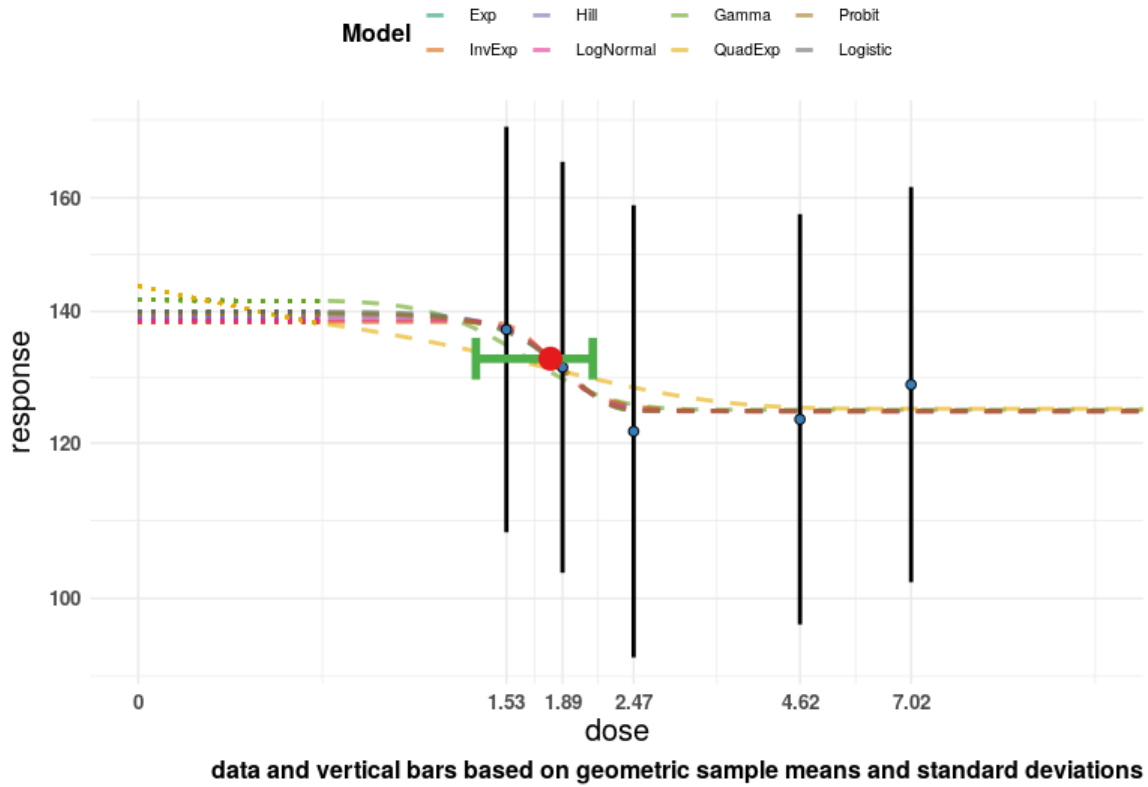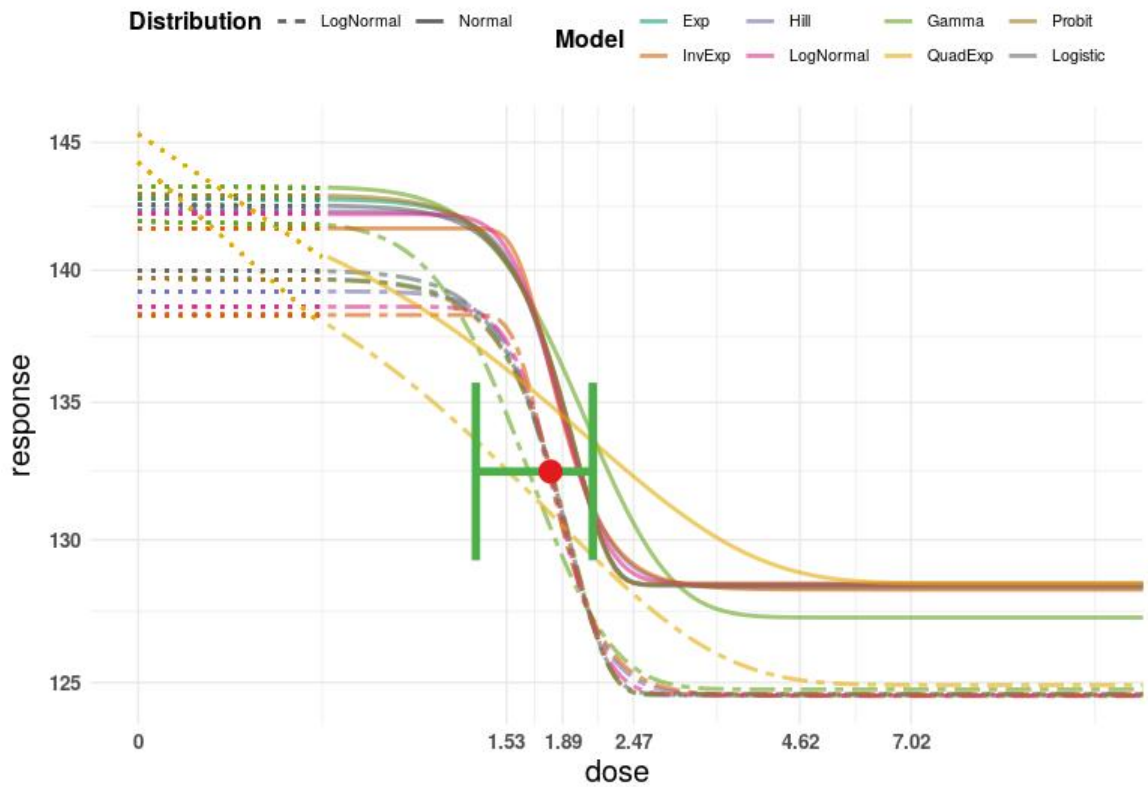

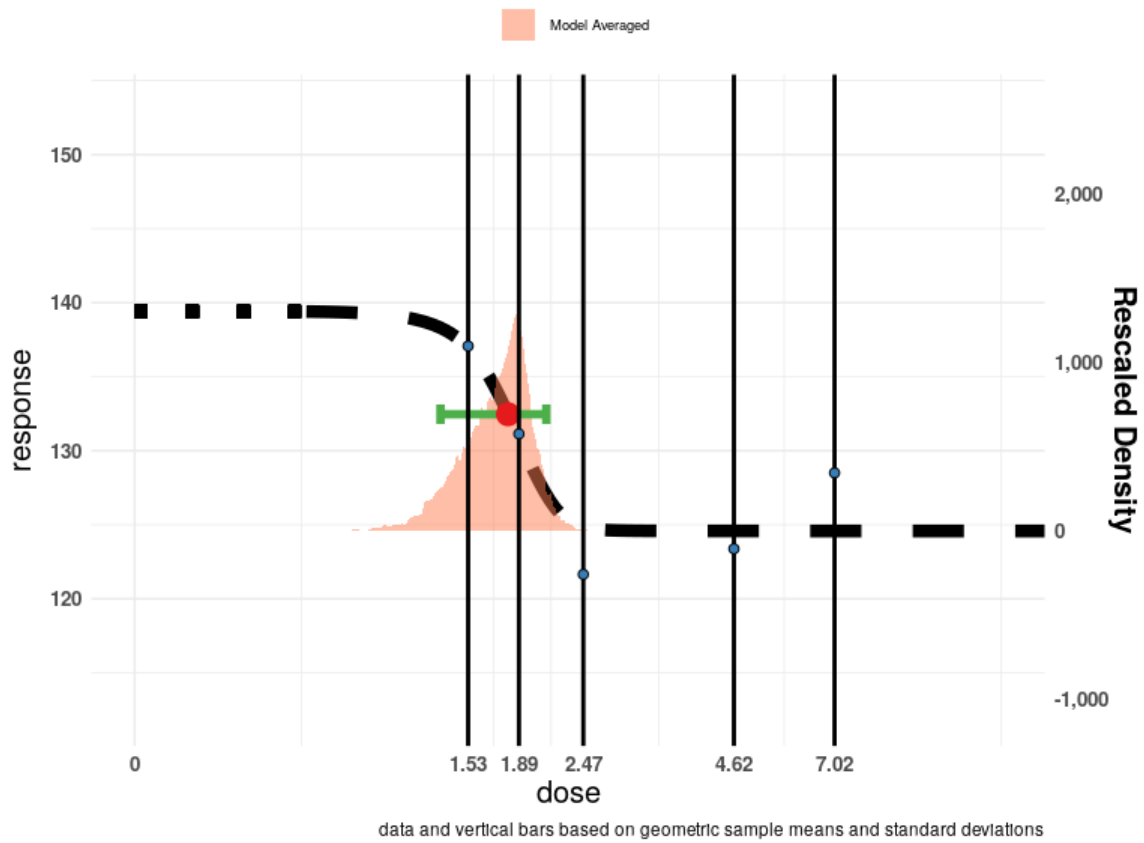

## Vahter et al. (2020), full developmental score, children u-tiAs 10 years, BMR 5%

### Data Description

The endpoint to be analyzed is: Full.development.score

Data used for analysis:

| Exposure | Full.development.score | SD | N   |
|----------|------------------------|----|-----|
| 0.98     | 141                    | 34 | 305 |
| 1.57     | 135                    | 33 | 305 |
| 2.49     | 126                    | 34 | 304 |
| 4.52     | 127                    | 31 | 305 |
| 11.52    | 132                    | 31 | 304 |

The 'Value for CES' is set to 0.05.

Extended dose range is applied.

Informative background prior: min: 127; the most likely; 141; max: 155. Shape parameter is applied.

The 'Sampling Method' is set to Bridge Sampling.

### Results

*Information pertaining to this endpoint.*

#### Check for constant variance coefficient of variation

Distributional assumption of constant variance is met, Bartlett test p-value is 0.2613

Distributional assumption of constant variance (on log-scale) is met, Bartlett test p-value is 0.1598

#### Goodness of Fit

Best fitting model fits sufficiently well (Bayes factor is 1.85e+00).

**Model Averaged BMD**

| Model          | Type | BMDL  | BMD   | BMDU  |
|----------------|------|-------|-------|-------|
| Model Averaged | BS   | 0.541 | 1.532 | 2.048 |

**Estimated BMDs per model**

| Model  | BMDL  | BMD   | BMDU  | Model Weights | Converged |
|--------|-------|-------|-------|---------------|-----------|
| E4_N   | 0.821 | 1.549 | 2.058 | 0.000         | 1         |
| IE4_N  | 0.920 | 1.588 | 2.093 | 0.000         | 1         |
| H4_N   | 0.886 | 1.559 | 2.049 | 0.000         | 1         |
| LN4_N  | 0.855 | 1.569 | 2.027 | 0.000         | 1         |
| G4_N   | 0.450 | 1.170 | 2.348 | 0.000         | 0         |
| QE4_N  | 0.157 | 0.406 | 1.058 | 0.000         | 1         |
| P4_N   | 0.798 | 1.547 | 2.068 | 0.000         | 1         |
| L4_N   | 0.868 | 1.565 | 2.061 | 0.000         | 1         |
| E4_LN  | 0.229 | 1.476 | 1.996 | 0.246         | 0         |
| IE4_LN | 0.887 | 1.574 | 2.020 | 0.080         | 1         |
| H4_LN  | 0.918 | 1.560 | 2.024 | 0.083         | 1         |
| LN4_LN | 1.001 | 1.578 | 2.014 | 0.134         | 1         |
| G4_LN  | 0.555 | 1.404 | 3.085 | 0.076         | 0         |
| QE4_LN | 0.133 | 0.342 | 0.970 | 0.012         | 1         |
| P4_LN  | 0.801 | 1.542 | 2.029 | 0.191         | 1         |
| L4_LN  | 0.900 | 1.549 | 2.031 | 0.177         | 1         |

**Plots of Fitted Models**

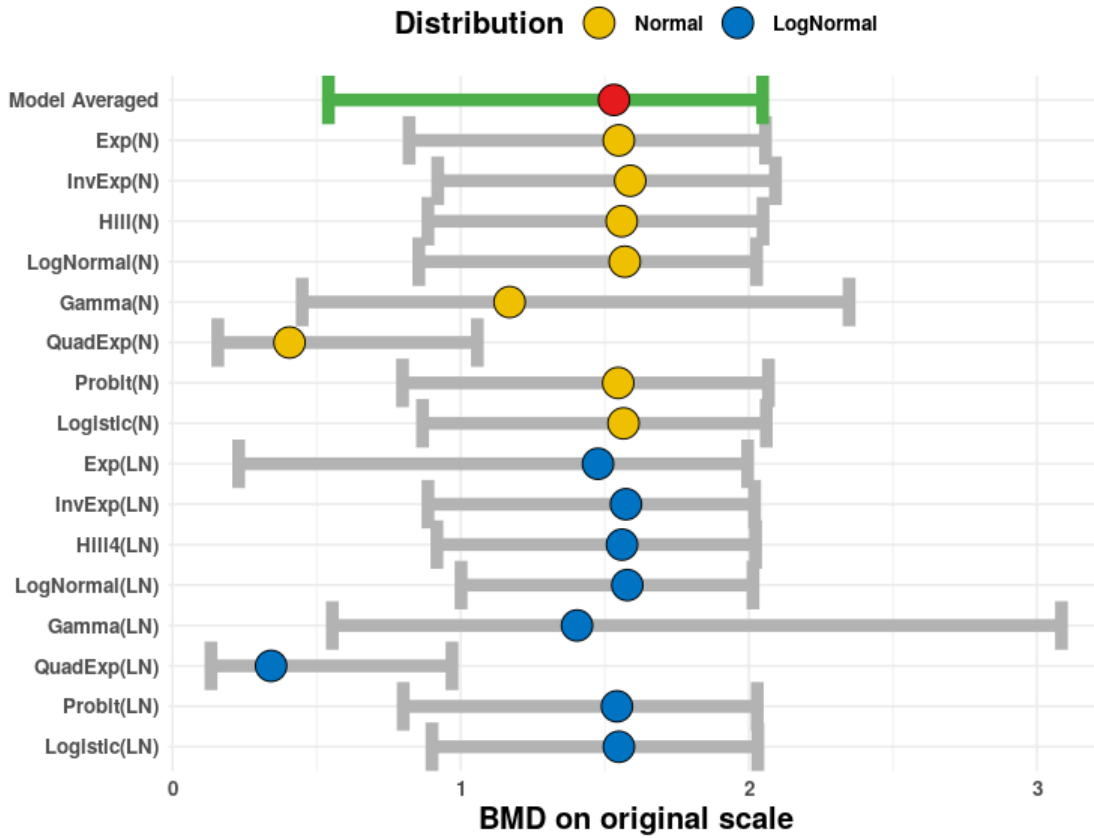

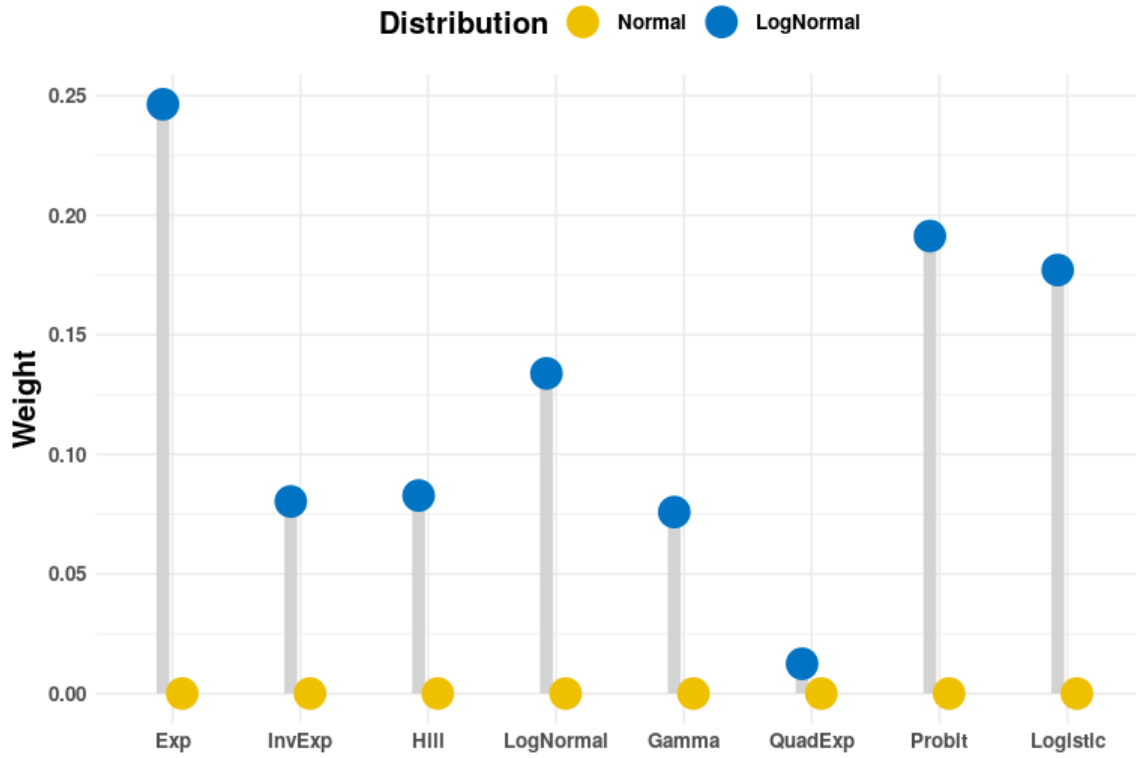

### Normal distribution

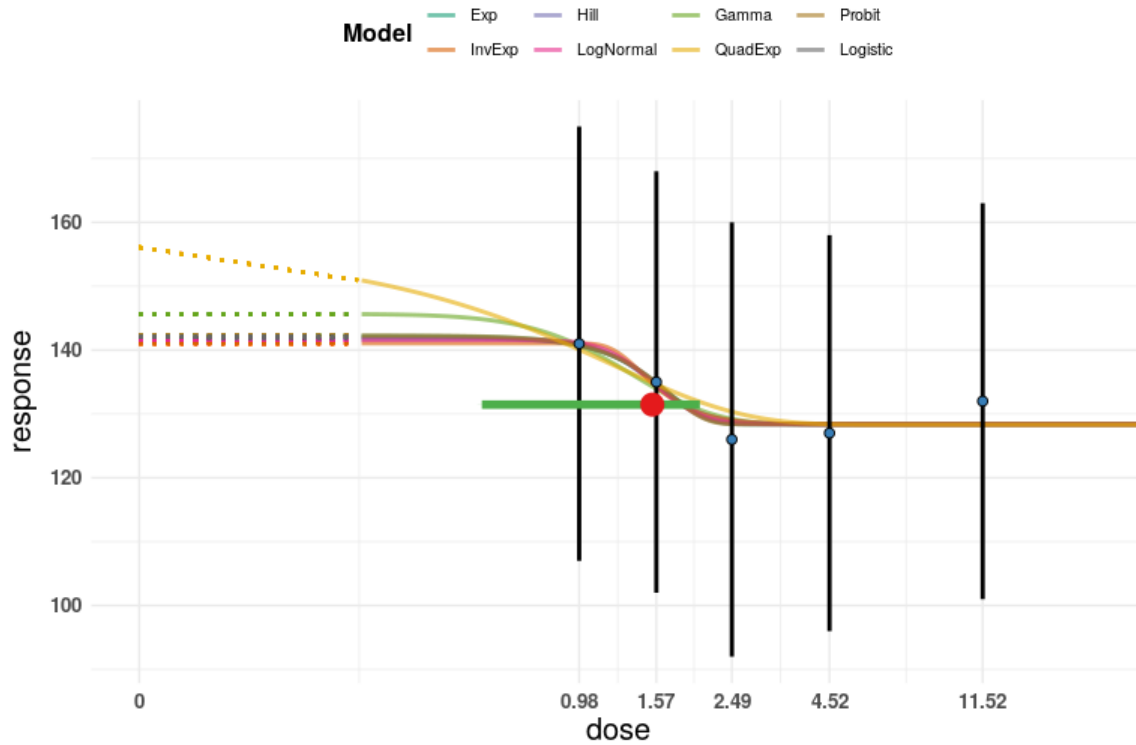

data and vertical bars based on arithmetic sample means and standard deviations

### LogNormal distribution

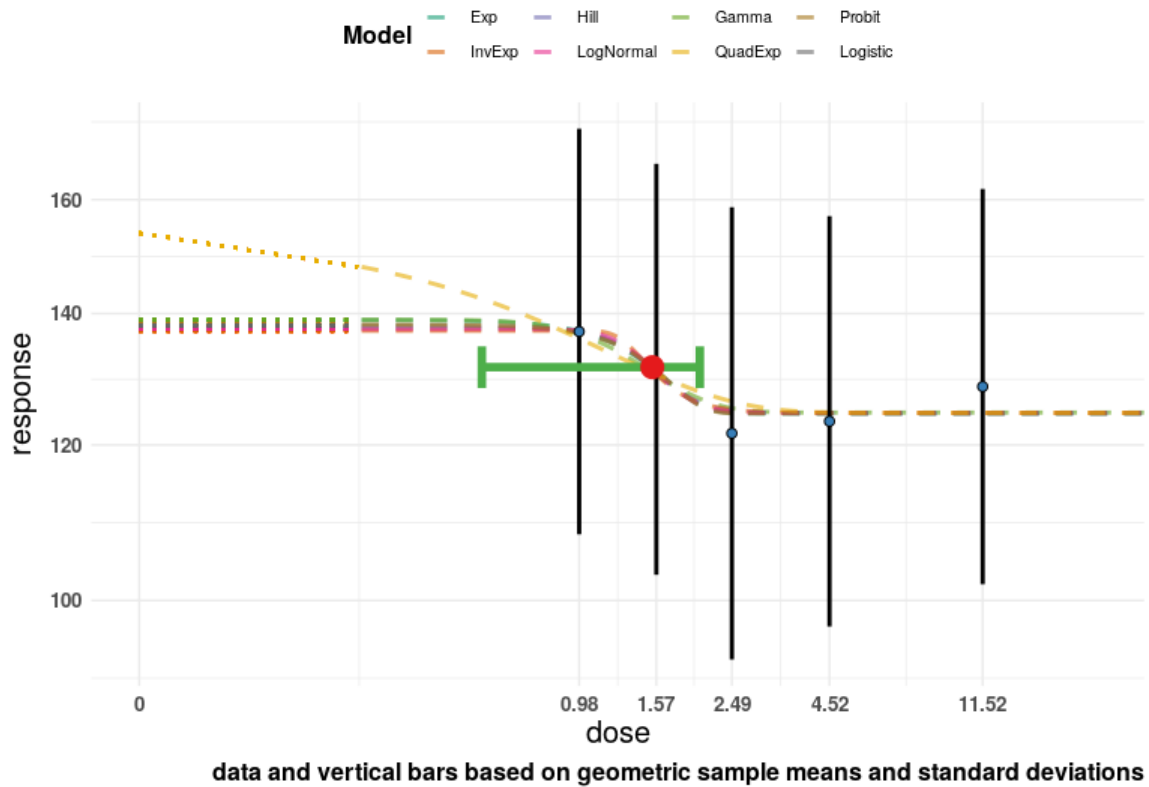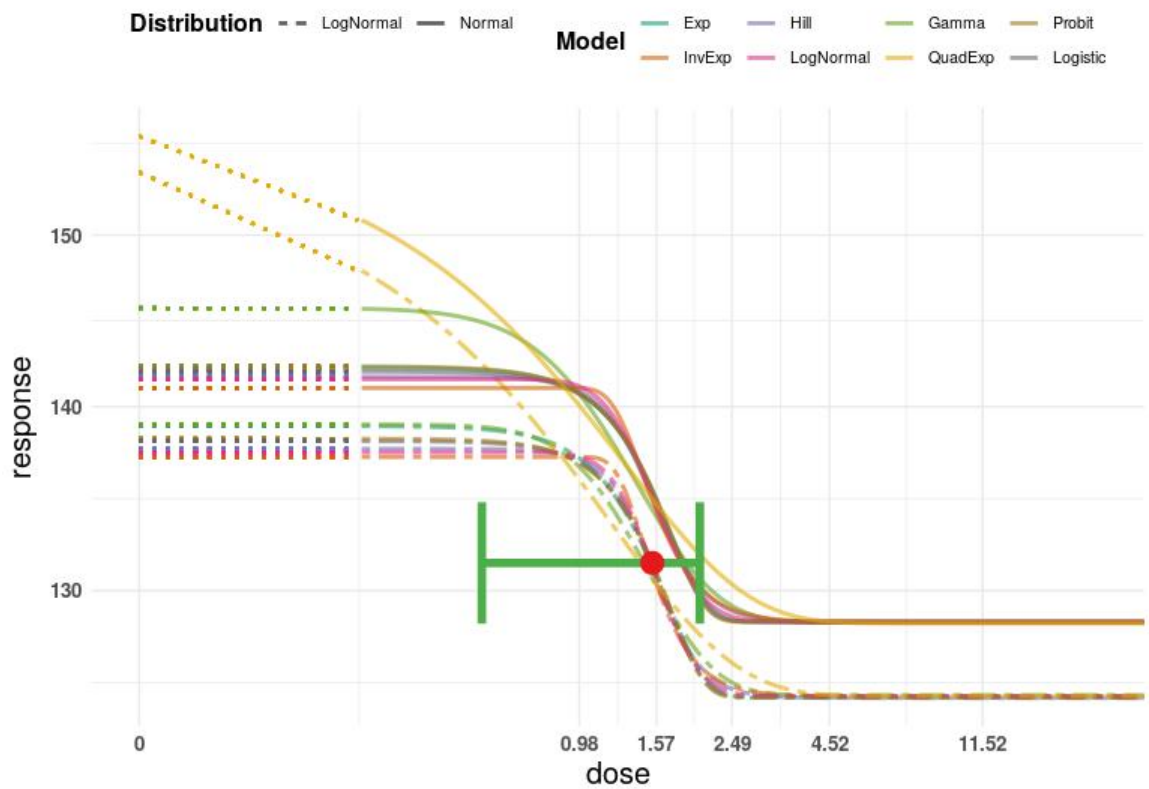

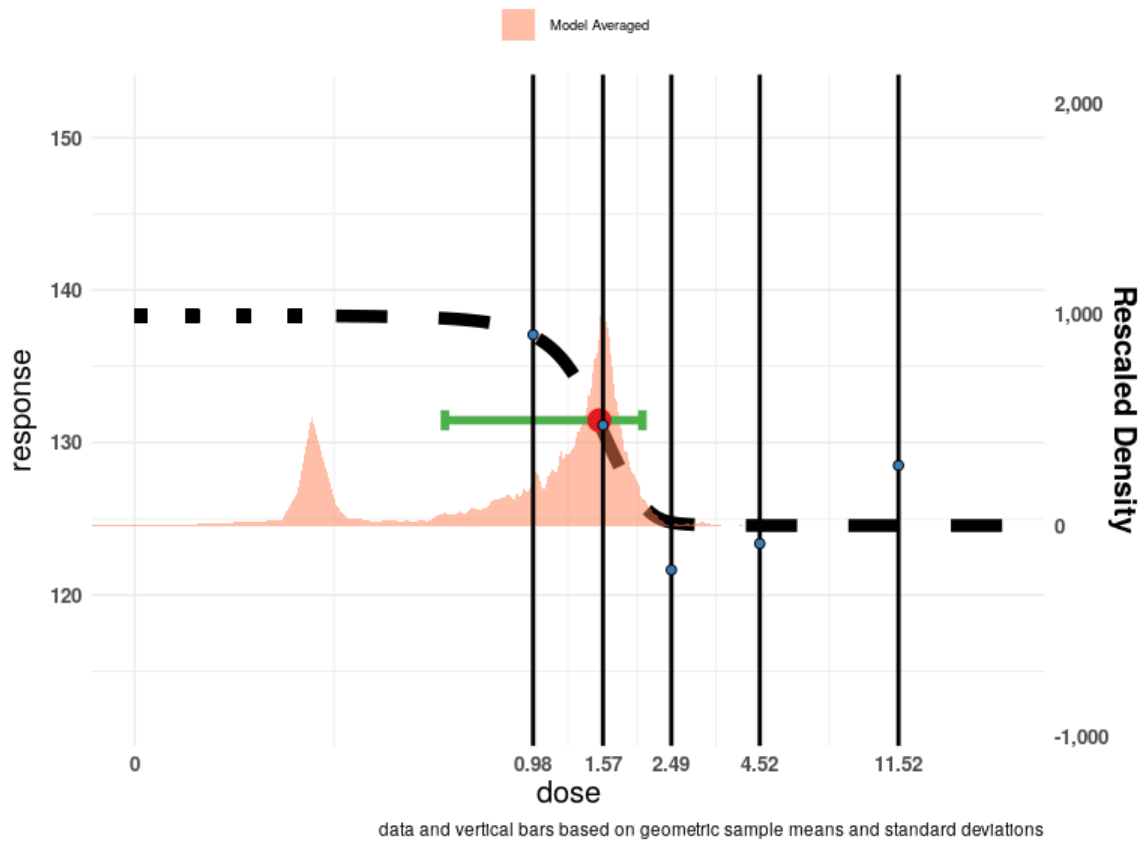



## Wade et al. (2015) ischemic heart disease, relative BMR 5%

### Data Description

The endpoint to be analyzed is: Adj.cases for ischemic heart disease

Data used for analysis:

| Exposure.µg.kg.bw.per.day | Adj.cases | N      |
|---------------------------|-----------|--------|
| 0.93                      | 124       | 100735 |
| 2.02                      | 146       | 96324  |
| 2.84                      | 15        | 2941   |

The 'Value for CES' is set to 6.162e-05.

Extended dose range is applied.

Informative background prior: min: 0.00104631; the most likely: 0.00123095; max: 0.00141560. Shape parameter is applied.

The 'Sampling Method' is set to Bridge Sampling.

### Results

*Information pertaining to this endpoint.*

### Goodness of Fit

Best fitting model fits sufficiently well (Bayes factor is 1.07e+00).

### Model Averaged BMD

| Model          | Type | BMDL  | BMD   | BMDU  |
|----------------|------|-------|-------|-------|
| Model Averaged | BS   | 1.227 | 1.667 | 2.279 |

### Estimated BMDs per model

| Model | BMDL  | BMD   | BMDU  | Model Weights | Converged |
|-------|-------|-------|-------|---------------|-----------|
| E4_Q  | 1.193 | 1.613 | 1.992 | 0.144         | 1         |
| IE4_Q | 1.526 | 1.838 | 2.532 | 0.192         | 1         |
| H4_Q  | 1.207 | 1.604 | 1.997 | 0.140         | 1         |
| LN4_Q | 1.401 | 1.737 | 2.240 | 0.239         | 1         |
| QE4_Q | 0.328 | 0.675 | 6.366 | 0.004         | 1         |
| P4_Q  | 1.112 | 1.544 | 2.034 | 0.155         | 1         |

**Plots of Fitted Models**

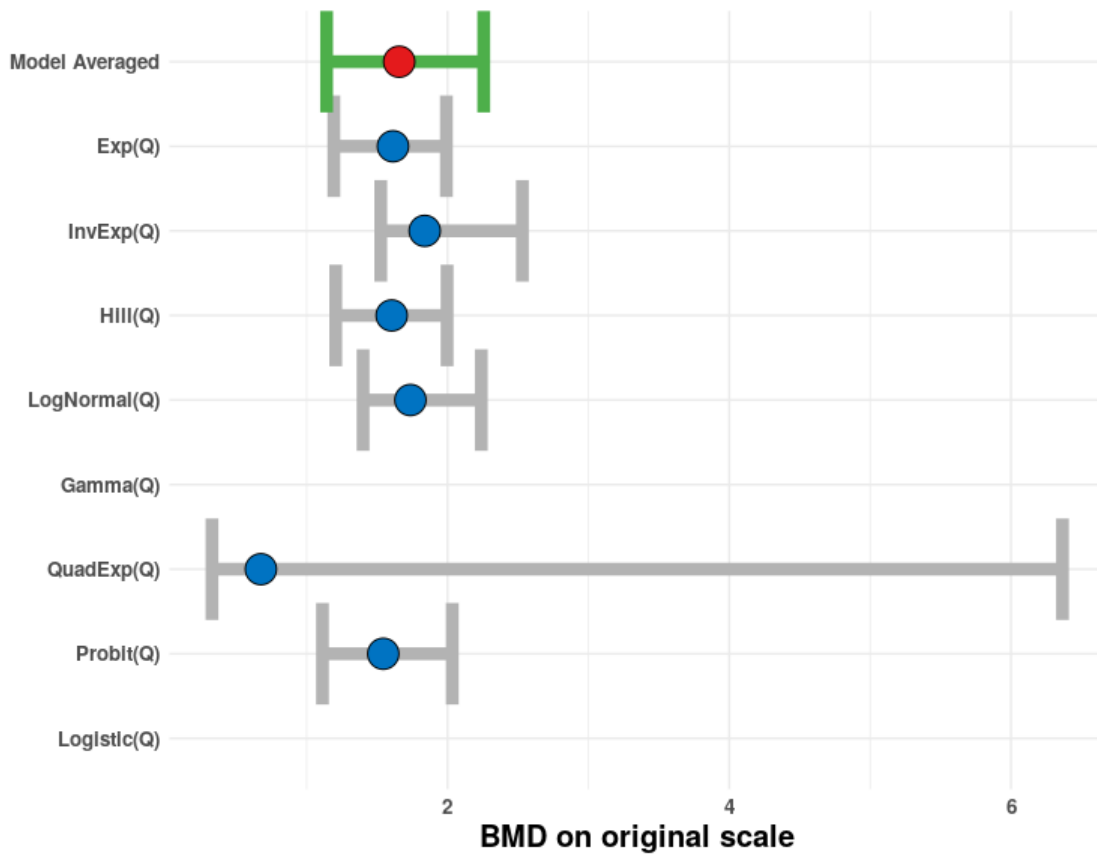

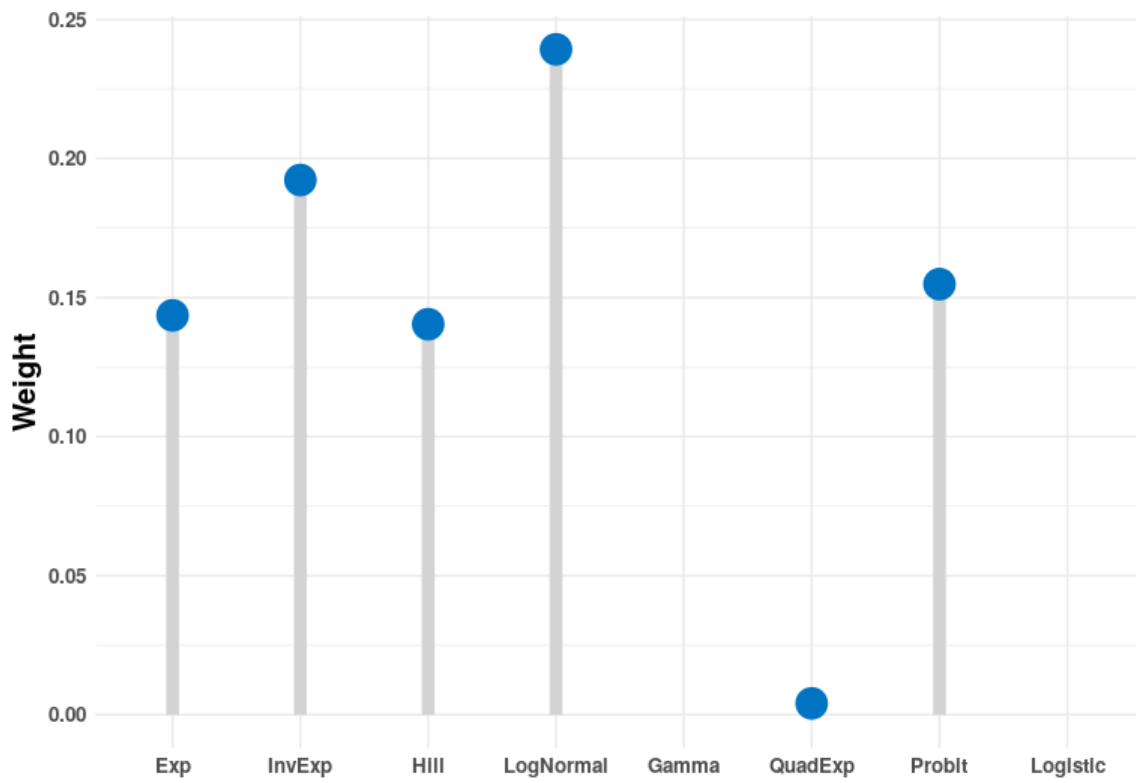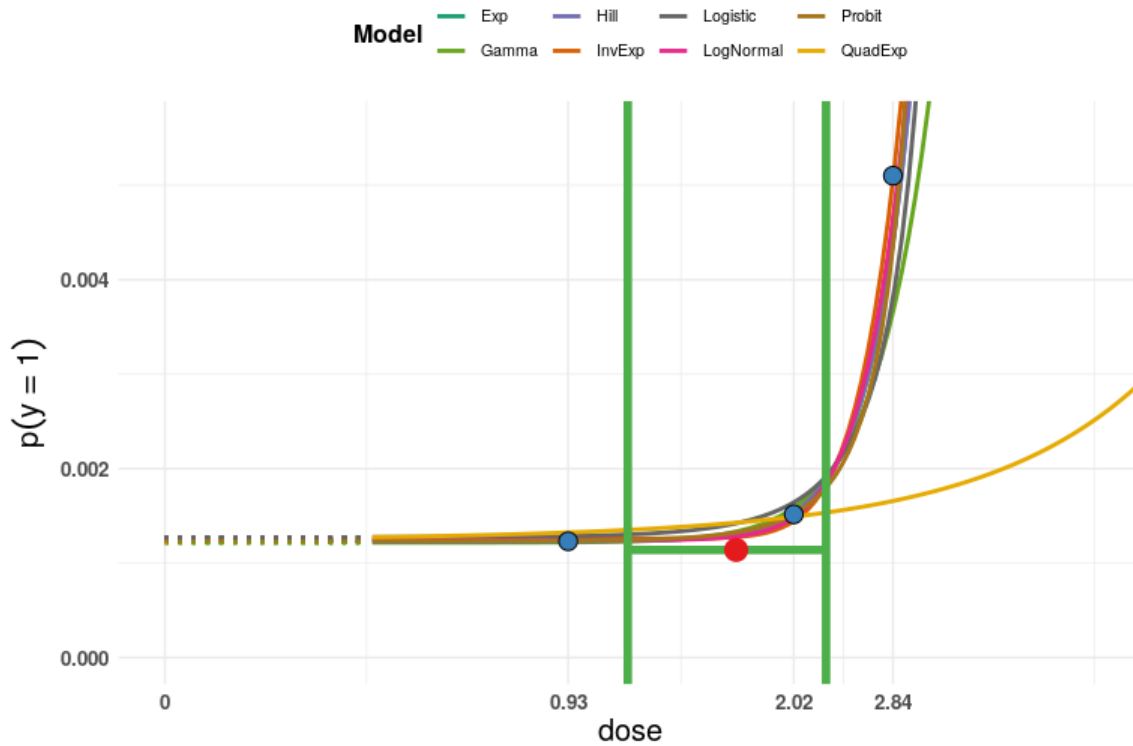

red dot and horizontal green bar indicate the model-averaged BMD and its 95%CI

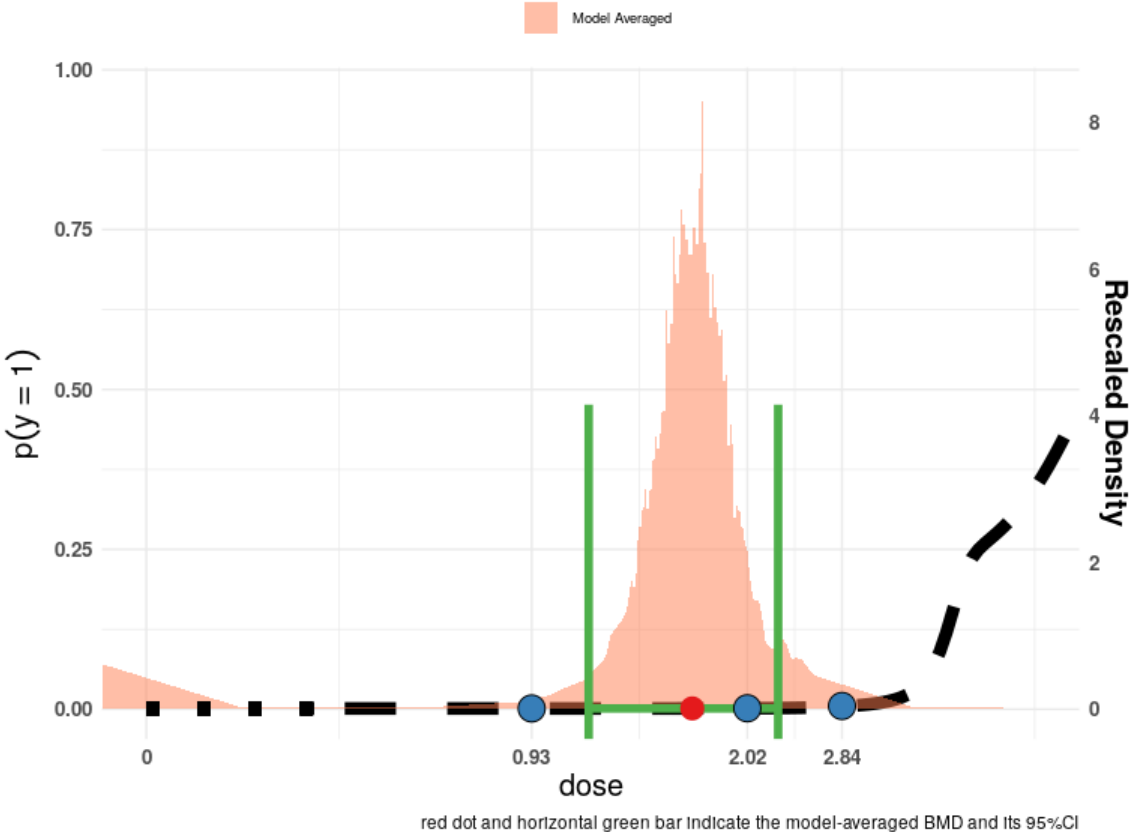

## Wu et al. (2015) ischemic heart disease, relative BMR 5%

### Data Description

The endpoint to be analyzed is: Adj.cases for ischemic heart disease

Data used for analysis:

| Exposure.µg.kg.bw.per.day | Adj.cases | N   |
|---------------------------|-----------|-----|
| 1.40                      | 64        | 453 |
| 4.49                      | 83        | 452 |
| 15.00                     | 90        | 454 |

The 'Value for CES' is set to 0.00822622.

Extended dose range is not applied.

Informative background prior: min: 0.13986755; the most likely: 0.14128035; max: 0.14269316. Shape parameter is applied.

The 'Sampling Method' is set to Bridge Sampling.

### Results

*Information pertaining to this endpoint.*

### Goodness of Fit

Best fitting model fits sufficiently well (Bayes factor is 5.15e+00).

### Model Averaged BMD

| Model          | Type | BMDL  | BMD   | BMDU   |
|----------------|------|-------|-------|--------|
| Model Averaged | BS   | 0.813 | 3.582 | 11.514 |

### Estimated BMDs per model

| Model | BMDL  | BMD   | BMDU   | Model Weights | Converged |
|-------|-------|-------|--------|---------------|-----------|
| E4_Q  | 0.595 | 3.892 | 11.131 | 0.123         | 1         |
| IE4_Q | 1.642 | 9.274 | 13.460 | 0.051         | 0         |
| H4_Q  | 0.626 | 3.836 | 11.663 | 0.126         | 1         |
| LN4_Q | 1.096 | 6.450 | 13.427 | 0.074         | 1         |
| G4_Q  | 0.615 | 3.945 | 10.594 | 0.134         | 1         |
| QE4_Q | 1.423 | 2.792 | 6.603  | 0.279         | 1         |
| P4_Q  | 0.649 | 4.023 | 10.733 | 0.105         | 1         |
| L4_Q  | 0.530 | 3.744 | 10.631 | 0.107         | 1         |

**Plots of Fitted Models**

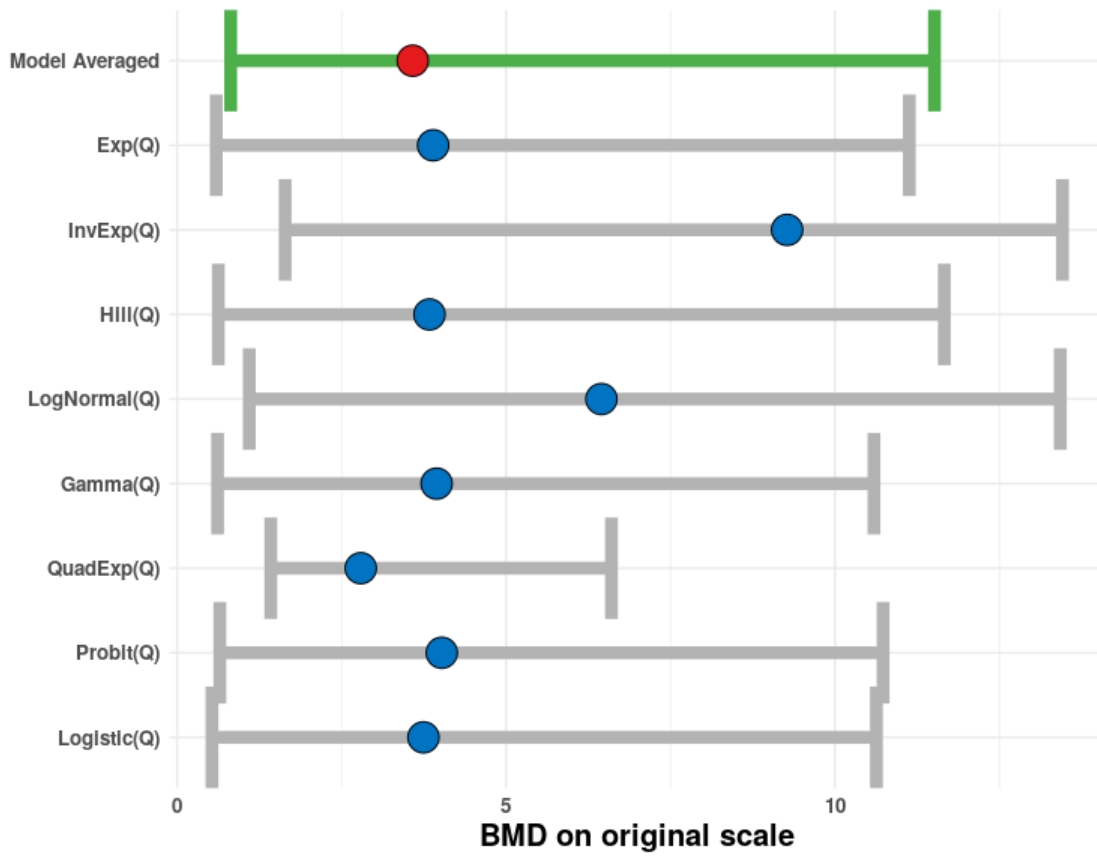

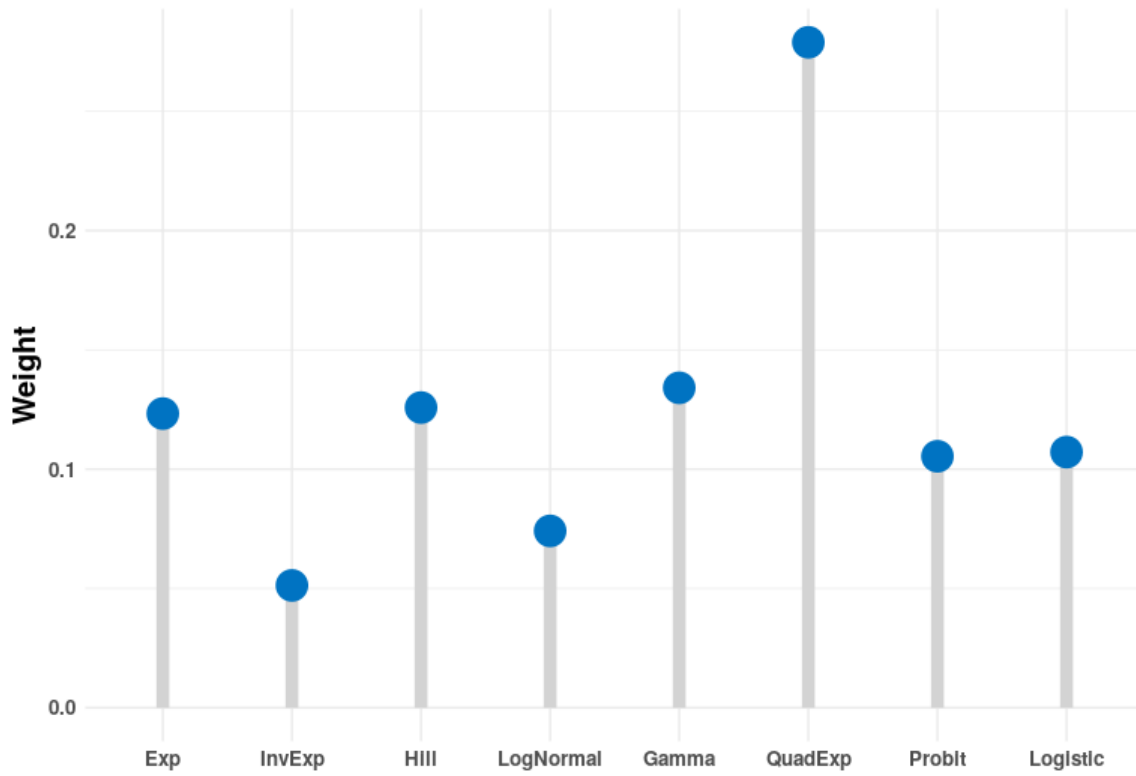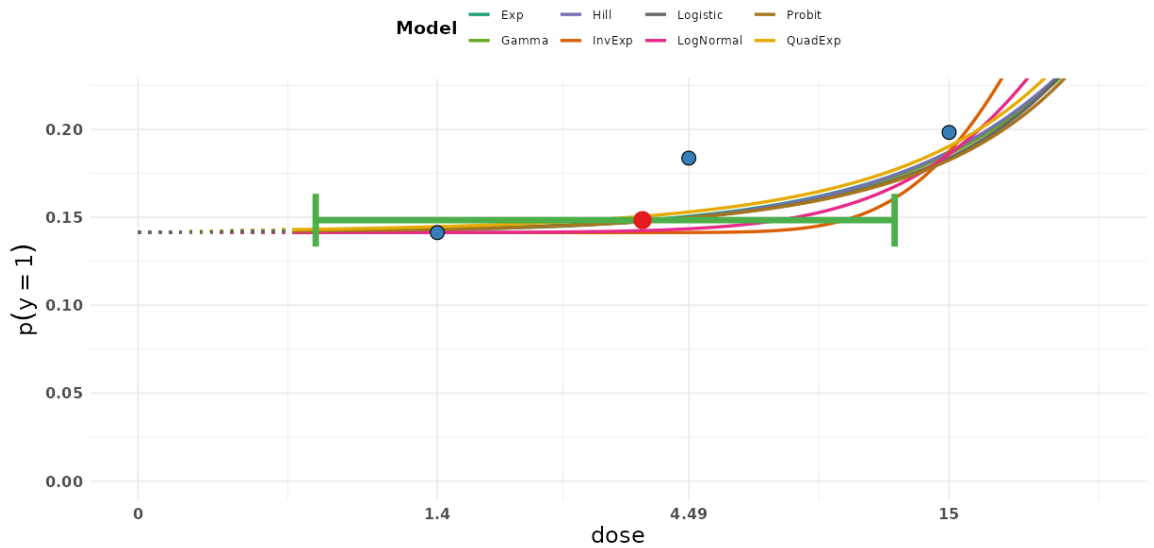

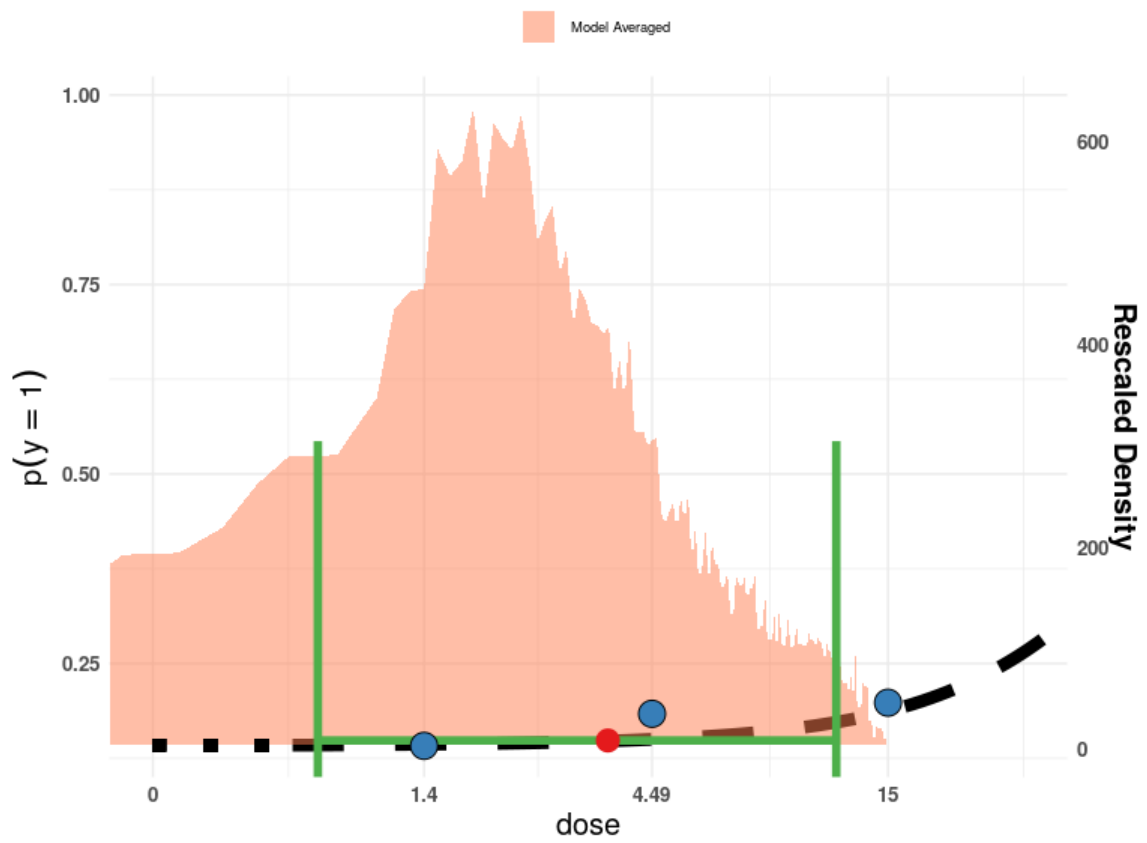



## Xia et al. (2009) skin lesions, relative BMR 5%

### Data Description

The endpoint to be analyzed is: Adj.cases for skin lesions

Data used for analysis:

| Exposure.µg.kg.bw.per.day | Adj.cases | N    |
|---------------------------|-----------|------|
| 0.79                      | 52        | 3215 |
| 1.07                      | 33        | 845  |
| 1.48                      | 56        | 1277 |
| 2.57                      | 206       | 3429 |
| 4.75                      | 137       | 1537 |
| 11.57                     | 127       | 1021 |
| 17.02                     | 10        | 92   |

The 'Value for CES' is set to 0.000822.

Extended dose range is applied.

Informative background prior: min: 0.01536547; the most likely: 0.01617418; max: 0.01698289. Shape parameter is applied.

The 'Sampling Method' is set to Bridge Sampling.

### Results

*Information pertaining to this endpoint.*

#### Goodness of Fit

Best fitting model fits sufficiently well (Bayes factor is 2.00e-03).

#### Model Averaged BMD

| Model          | Type | BMDL  | BMD   | BMDU  |
|----------------|------|-------|-------|-------|
| Model Averaged | BS   | 0.106 | 0.182 | 0.253 |

#### Estimated BMDs per model

| Model | BMDL  | BMD    | BMDU    | Model Weights | Converged |
|-------|-------|--------|---------|---------------|-----------|
| E4_Q  | 0.015 | 0.028  | 0.049   | 0.001         | 1         |
| IE4_Q | 0.124 | 0.184  | 0.253   | 0.941         | 1         |
| H4_Q  | 0.017 | 0.033  | 0.056   | 0.002         | 1         |
| LN4_Q | 0.059 | 0.097  | 0.145   | 0.057         | 1         |
| G4_Q  | 0.018 | 88.990 | 225.952 | 0.000         | 0         |
| QE4_Q | 0.058 | 0.063  | 0.070   | 0.000         | 1         |
| P4_Q  | 0.001 | 0.003  | 0.007   | 0.000         | 1         |
| L4_Q  | 0.001 | 0.002  | 0.004   | 0.000         | 1         |

### Plots of Fitted Models

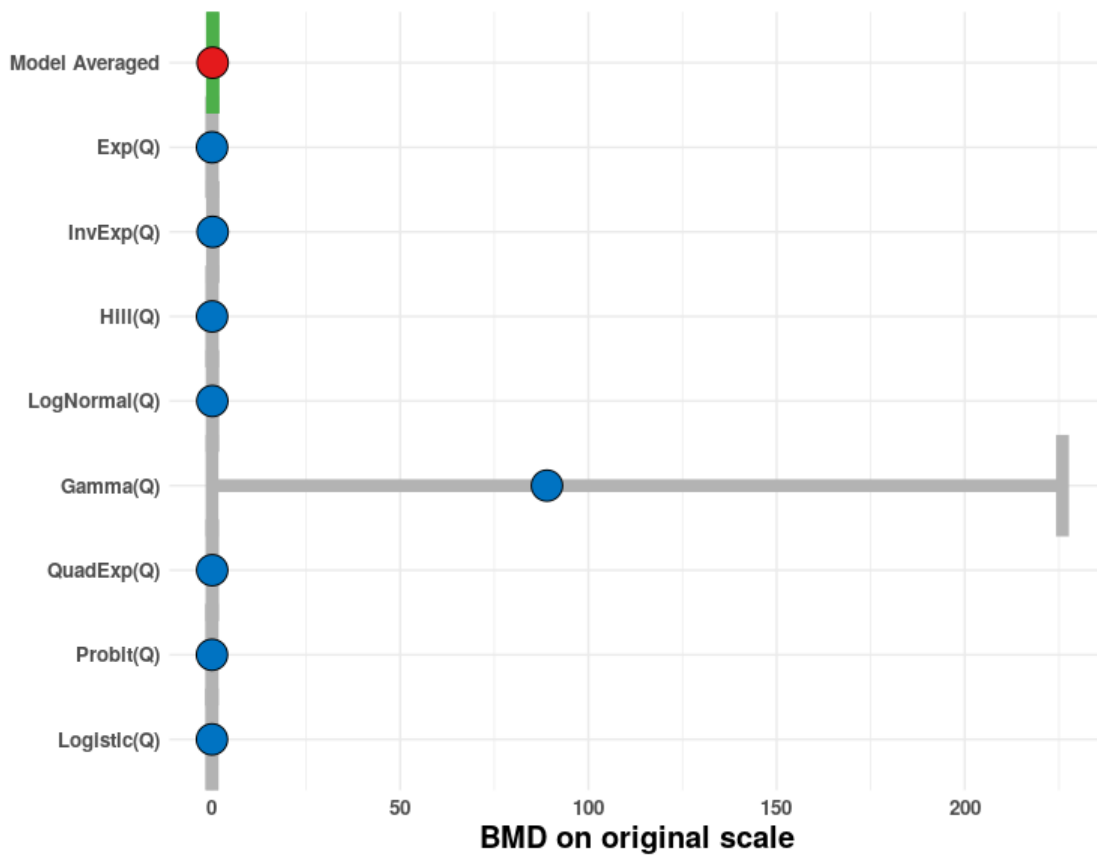

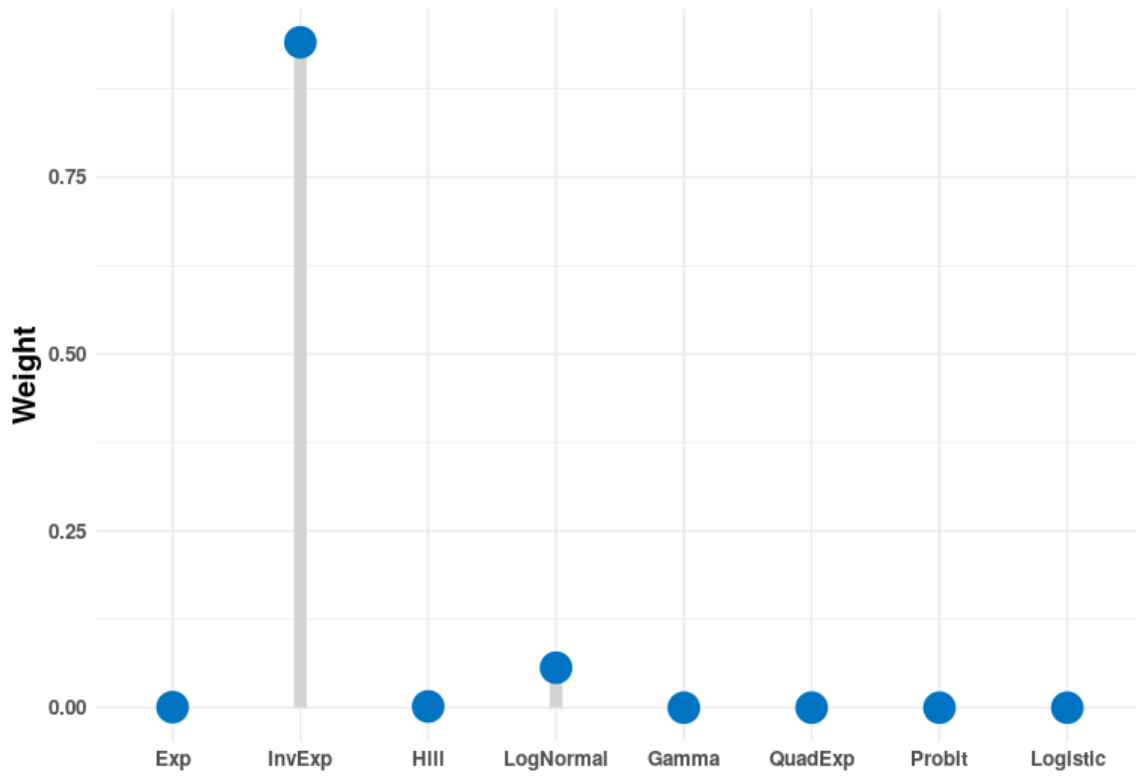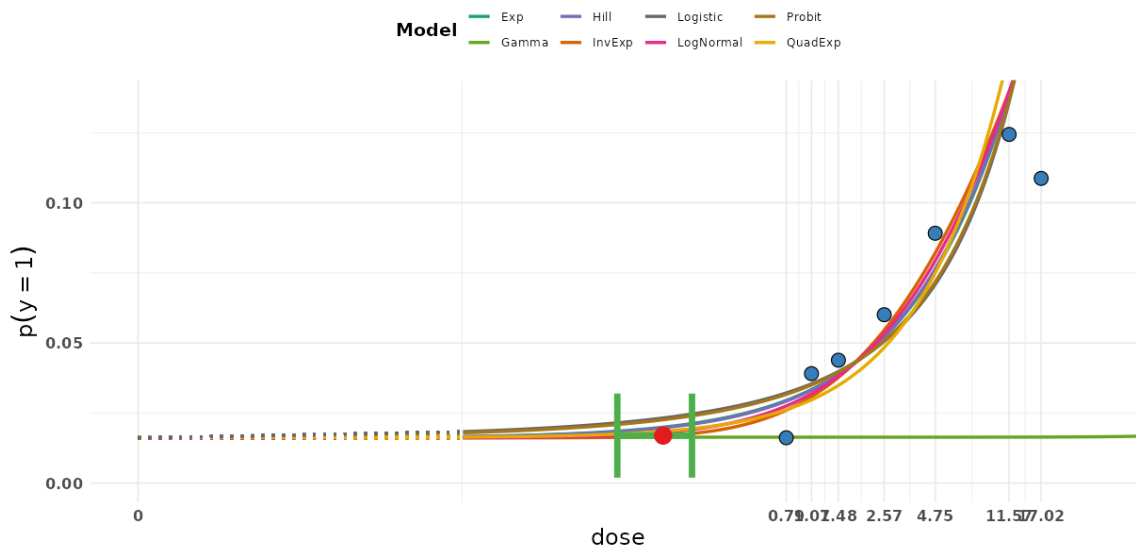

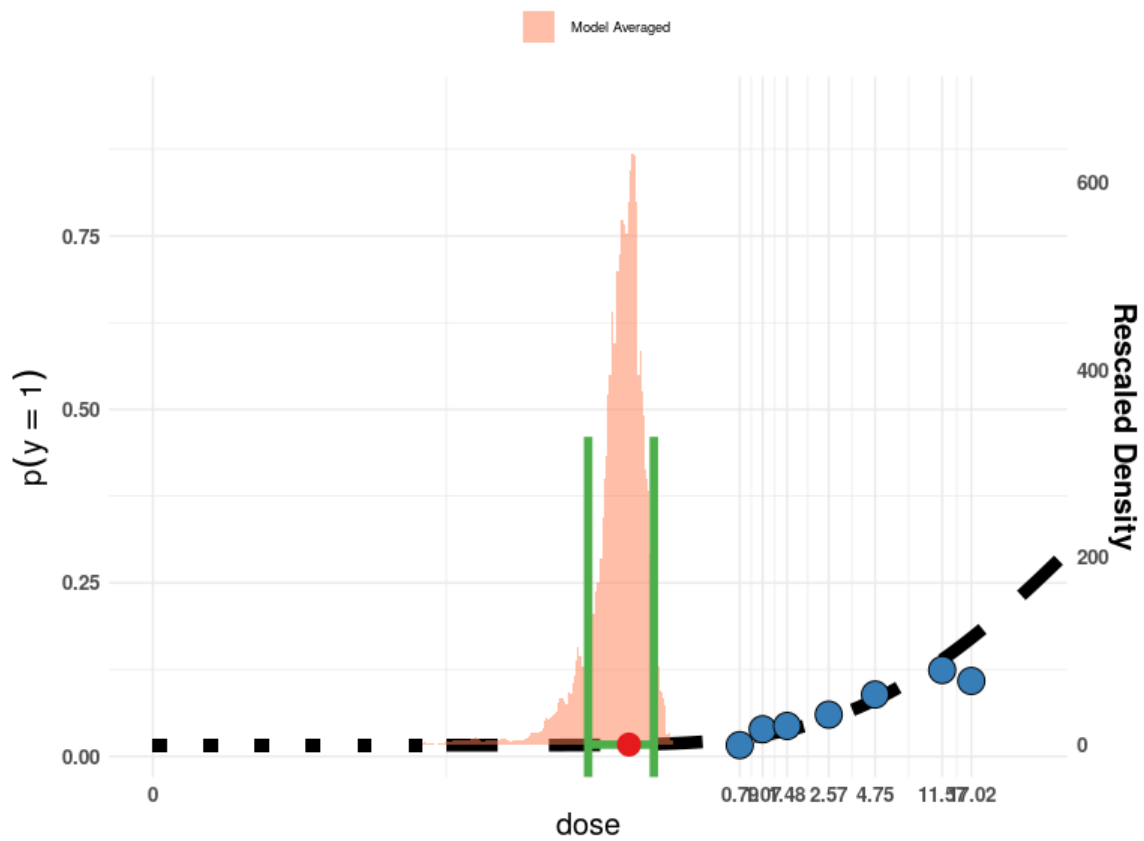

## Zheng et al. (2015) chronic kidney disease, relative BMR 5%

### Data Description

The endpoint to be analyzed is: Adj.cases for chronic kidney disease

Data used for analysis:

| Exposure.µg.kg.bw.per.day | Adj.cases | N   |
|---------------------------|-----------|-----|
| 0.061                     | 101       | 772 |
| 0.160                     | 113       | 781 |
| 0.260                     | 124       | 784 |
| 0.350                     | 164       | 782 |

The 'Value for CES' is set to 0.00752608.

Extended dose range is not applied.

Informative background prior: min: 0.12952073; the most likely: 0.13082902; max: 0.13213731. Shape parameter is applied.

The 'Sampling Method' is set to Bridge Sampling.

### Results

*Information pertaining to this endpoint.*

#### Goodness of Fit

Best fitting model fits sufficiently well (Bayes factor is 2.40e-02).

#### Model Averaged BMD

| Model          | Type | BMDL  | BMD   | BMDU  |
|----------------|------|-------|-------|-------|
| Model Averaged | BS   | 0.062 | 0.153 | 0.239 |

#### Estimated BMDs per model

| Model | BMDL  | BMD   | BMDU  | Model Weights | Converged |
|-------|-------|-------|-------|---------------|-----------|
| E4_Q  | 0.073 | 0.151 | 0.228 | 0.138         | 1         |
| IE4_Q | 0.116 | 0.193 | 0.262 | 0.094         | 1         |
| H4_Q  | 0.071 | 0.150 | 0.232 | 0.138         | 1         |
| LN4_Q | 0.096 | 0.179 | 0.250 | 0.123         | 1         |
| G4_Q  | 0.075 | 0.153 | 0.224 | 0.170         | 1         |
| QE4_Q | 0.041 | 0.069 | 0.102 | 0.083         | 1         |
| P4_Q  | 0.073 | 0.152 | 0.242 | 0.129         | 1         |
| L4_Q  | 0.073 | 0.149 | 0.236 | 0.126         | 1         |

**Plots of Fitted Models**

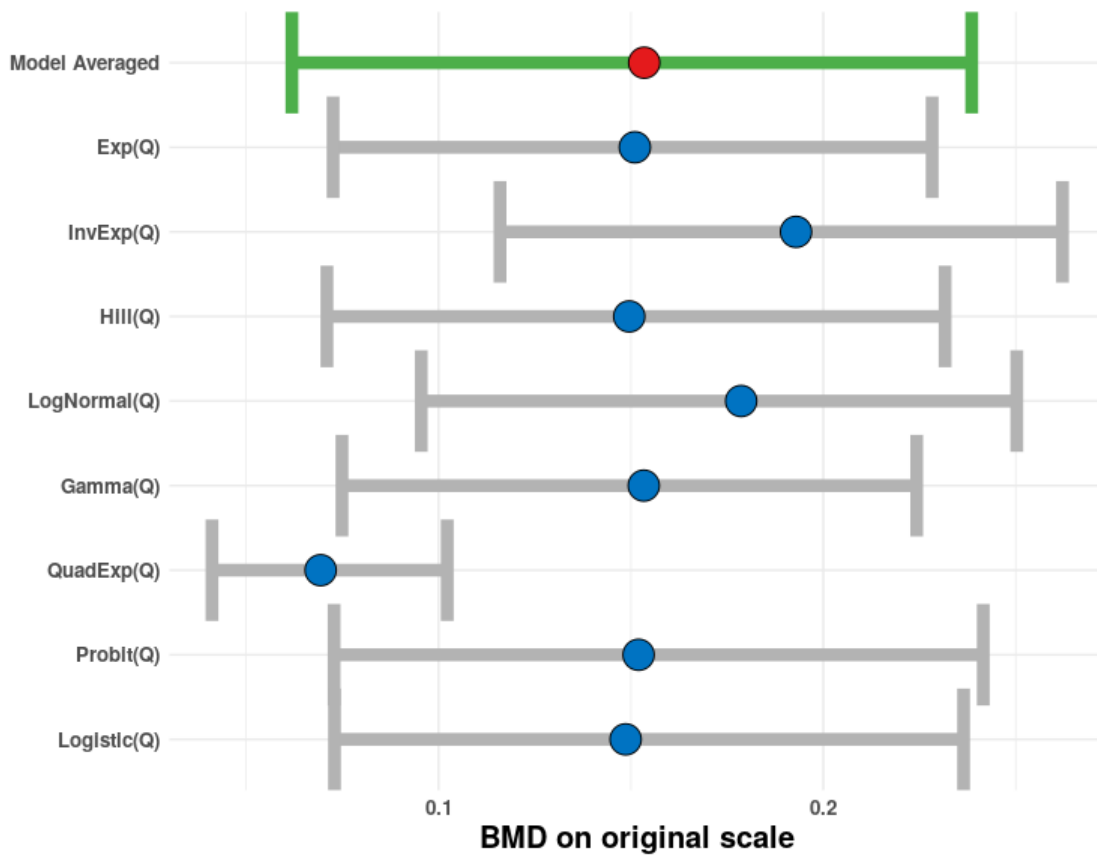

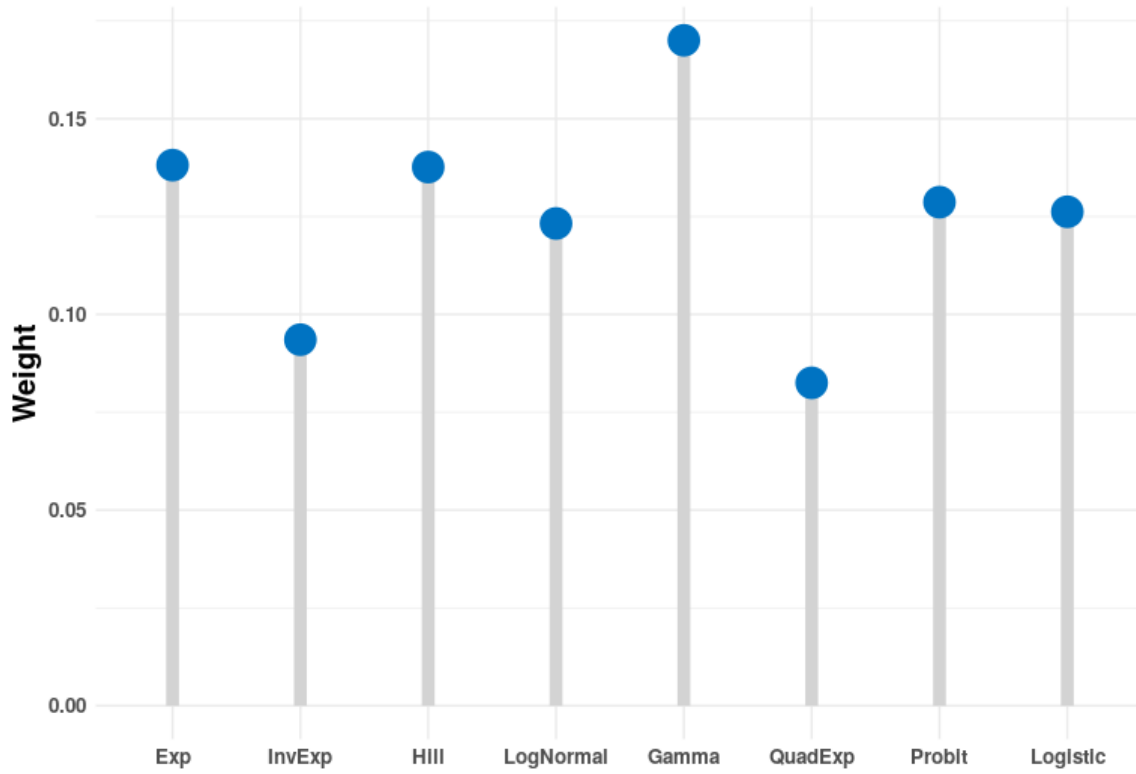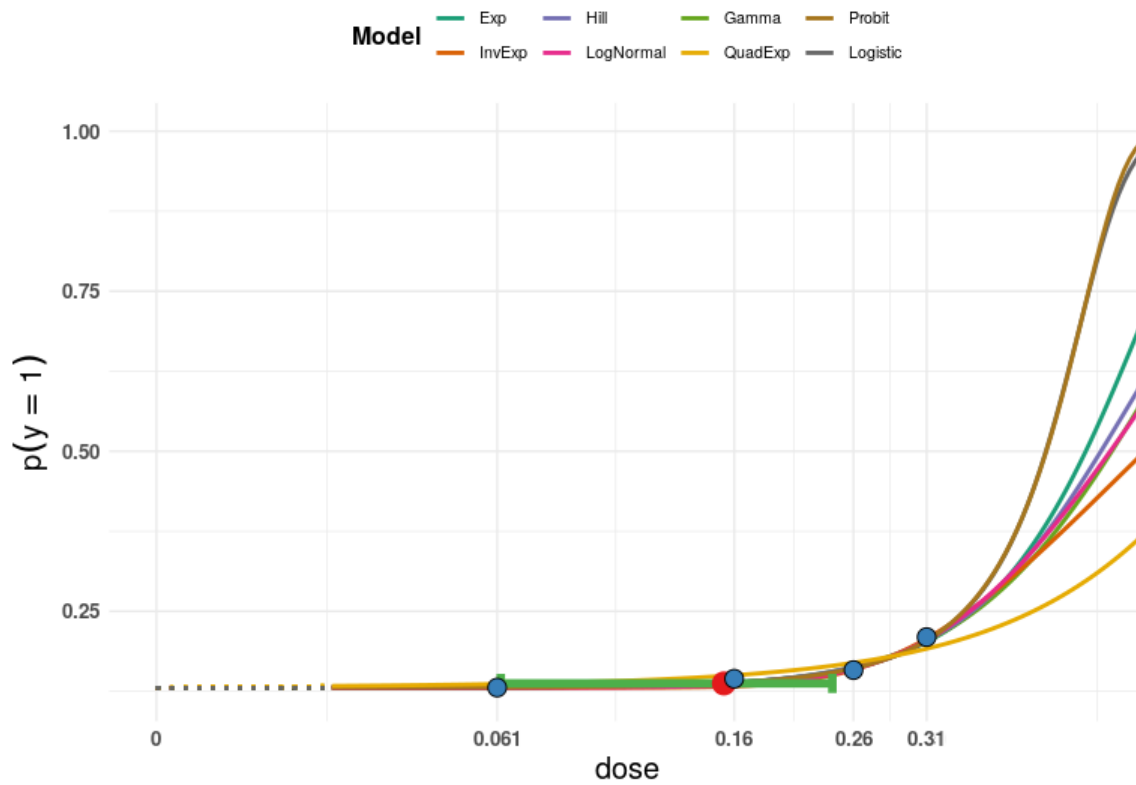

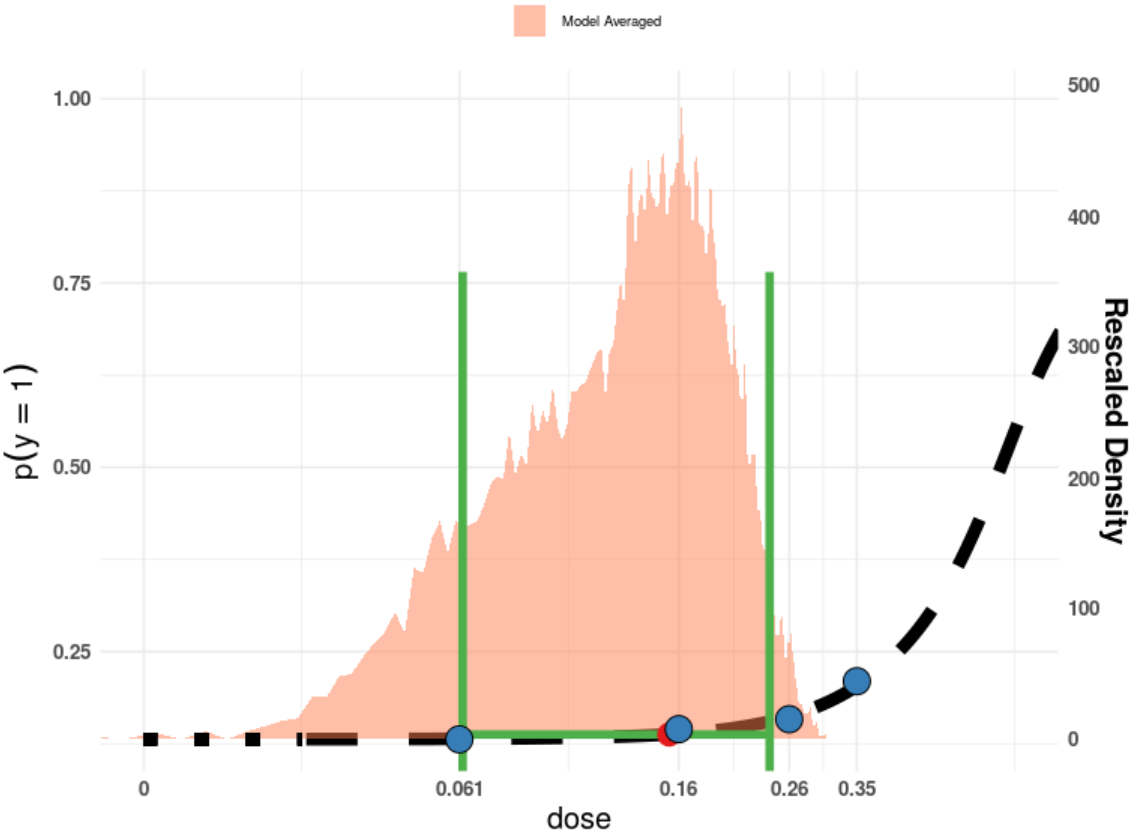



## References

- Ahsan H, Chen Y, Parvez F, Zablotska L, Argos M, Hussain I, Momotaj H, Levy D, Cheng Z, Slavkovich V, van Geen A, Howe GR, Graziano JH, 2006. Arsenic exposure from drinking water and risk of premalignant skin lesions in Bangladesh: baseline results from the Health Effects of Arsenic Longitudinal Study. *Am J Epidemiol*, 163(12):1138-48. doi: 10.1093/aje/kwj154.
- Chen CL, Chiou HY, Hsu LI, Hsueh YM, Wu MM and Chen CJ, 2010a. Ingested arsenic, characteristics of well water consumption and risk of different histological types of lung cancer in northeastern Taiwan. *Environ Res*, 110:455-462. doi: 10.1016/j.envres.2009.08.010
- Chen CL, Chiou HY, Hsu LI, Hsueh YM, Wu MM, Wang YH and Chen CJ, 2010b. Arsenic in drinking water and risk of urinary tract cancer: a follow-up study from northeastern Taiwan. *Cancer Epidemiol Biomarkers Prev*, 19:101-110. doi: 10.1158/1055-9965.Epi-09-0333
- Cherry N, Shaikh K, McDonald C, Chowdhury Z, 2008. Stillbirth in rural Bangladesh: arsenic exposure and other etiological factors: a report from Gonoshasthaya Kendra. *Bulletin of the World Health Organization* 86, 172-177.
- EFSA Scientific Committee, More SJ, Bampidis V, Benford D, Bragard C, Halldorsson TI, Hernandez-Jerez AF, Bennekou SH, Koutsoumanis K, Lambre C, Machera K, Mennes W, Mullins E, Nielsen SS, Schrenk D, Turck D, Younes M, Aerts M, Edler L, Sand S, Wright M, Binaglia M, Bottex B, Cortnas Abrahantes J and Schlatter J, 2022. Guidance on the use of the benchmark dose approach in risk assessment. *EFSA Journal* 2022;20(10):7584, 67 pp. <https://doi.org/10.2903/j.efsa.2022.7584>
- Gilbert-Diamond D, Li Z, Perry AE, Spencer SK, Gandolfi AJ, Karagas MR, 2013. A population-based case-control study of urinary arsenic species and squamous cell carcinoma in New Hampshire, USA. *Environ Health Perspect*, 121(10):1154.
- Hsueh YM, Chung CJ, Shiue HS, Chen JB, Chiang SS, Yang MH, Tai CW and Su CT, 2009. Urinary arsenic species and CKD in a Taiwanese population: a case-control study. *Am J Kidney Dis*, 54:859-870. doi: 10.1053/j.ajkd.2009.06.016 Epub 2009 Aug 14.
- James KA, Byers T, Hokanson JE, Meliker JR, Zerbe GO and Marshall JA, 2015. Association between lifetime exposure to inorganic arsenic in drinking water and coronary heart disease in Colorado residents. *Environ Health Perspect*, 123:128-134. doi: 10.1289/ehp.1307839
- Leonardi G, Vahter M, Clemens F, Goessler W, Gurzau E, Hemminki K, Hough R, Koppova K, Kumar R, Rudnai P, Surdu S and Fletcher T, 2012. Inorganic arsenic and basal cell carcinoma in areas of Hungary, Romania, and Slovakia: a case-control study. *Environ Health Perspect*, 120:721-726. doi: 10.1289/ehp.1103534
- Milton AH, Smith W, Rahman B, Hasan Z, Kulsum U, Dear K, Rakibuddin M, Ali A, 2005. Chronic arsenic exposure and adverse pregnancy outcomes in Bangladesh. *Epidemiology* 16 (1), 82-86.
- Moon KA, Guallar E, Umans JG, Devereux RB, Best LG, Francesconi KA, Goessler W, Pollak J, Silbergeld EK, Howard BV and Navas-Acien A, 2013. Association between exposure to low to moderate arsenic levels and incident cardiovascular disease. A prospective cohort study. *Ann Intern Med*, 159:649-659. doi: 10.7326/0003-4819-159-10-201311190-00719
- Parvez F, Chen Y, Yunus M, Olopade C, Segers S, Slavkovich V, Argos M, Hasan R, Ahmed A, Islam T, Akter MM, Graziano JH and Ahsan H, 2013. Arsenic exposure and impaired lung function. Findings from a large population-based prospective cohort study. *Am J Respir Crit Care Med*, 188:813-819. doi: 10.1164/rccm.201212-2282OC

- Pierce BL, Argos M, Chen Y, Melkonian S, Parvez F, Islam T, Ahmed A, Hasan R, Rathouz PJ, Ahsan H, 2011. Arsenic exposure, dietary patterns, and skin lesion risk in bangladesh: a prospective study. *Am J Epidemiol*, 173(3):345-54. doi: 10.1093/aje/kwq366.
- Powers M, Sanchez TR, Grau-Perez M, Yeh F, Francesconi KA, Goessler W, George CM, Heaney C, Best LG, Umans JG, Brown RH and Navas-Acien A, 2019. Low-moderate arsenic exposure and respiratory in American Indian communities in the Strong Heart Study. *Environ Health*, 18:104. doi: 10.1186/s12940-019-0539-6
- Rahman A, Vahter M, Ekstrom EC, Rahman M, Mustafa AMG, Wahed MA, Yunus M, Persson LA, 2007. Association of arsenic exposure during pregnancy with foetal loss and infant death: a cohort study in Bangladesh. *American Journal of Epidemiology* 165 (12), 1389-1396.
- Rahman A, Persson L, Nermell B, El Arifeen S, Ekström EC, Smith AH and Vahter M, 2010. Arsenic exposure and risk of spontaneous abortion, stillbirth, and infant mortality. *Epidemiology*, 21:797-804. doi: 10.1097/EDE.0b013e3181f56a0d
- Richter F, Kloster S, Wodschow K, Hansen B, Schullehner J, Kristiansen SM, Petersen MM, Strandberg-Larsen K and Ersbøll AK, 2022. Maternal exposure to arsenic in drinking water and risk of congenital heart disease in the offspring. *Environment International*, 160:107051. doi: <https://doi.org/10.1016/j.envint.2021.107051>
- Siddique AE, Rahman M, Hossain MI, Karim Y, Hasibuzzaman MM, Biswas S, Islam MS, Rahman A, Hossen F, Mondal V and Banna HU, 2020. Association between chronic arsenic exposure and the characteristic features of asthma. *Chemosphere*, 246:125790.
- Steinmaus CM, Ferreccio C, Romo JA, Yuan Y, Cortes S, Marshall G, Moore LE, Balmes JR, Liaw J, Golden T, Smith AH, 2013. Drinking water arsenic in northern chile: high cancer risks 40 years after exposure cessation. *Cancer Epidemiol Biomarkers Prev*, 22(4):623-30.
- Steinmaus C, Ferreccio C, Yuan Y, Acevedo J, González F, Perez L, Cortés S, Balmes JR, Liaw J, Smith AH, 2014a. Elevated lung cancer in younger adults and low concentrations of arsenic in water. *Am J Epidemiol*, 180(11):1082-7. doi: 10.1093/aje/kwu238
- Vahter M, Skröder H, Rahman SM, Levi M, Derakhshani Hamadani J, Kippler M, 2020. Prenatal and childhood arsenic exposure through drinking water and food and cognitive abilities at 10 years of age: A prospective cohort study. *Environ Int*, 139:105723. doi: 10.1016/j.envint.2020.105723
- Wade TJ, Xia Y, Mumford J, Wu K, Le XC, Sams E and Sanders WE, 2015. Cardiovascular disease and arsenic exposure in Inner Mongolia, China: a case control study. *Environ Health*, 14:35. doi: 10.1186/s12940-015-0022-y
- Wu F, Jasmine F, Kibriya MG, Liu M, Cheng X, Parvez F, Islam T, Ahmed A, Rakibuz-Zaman M, Jiang J, Roy S, Paul-Brutus R, Slavkovich V, Islam T, Levy D, VanderWeele TJ, Pierce BL, Graziano JH, Ahsan H and Chen Y, 2015. Interaction between arsenic exposure from drinking water and genetic polymorphisms on cardiovascular disease in Bangladesh: a prospective case-cohort study. *Environ Health Perspect*, 123:451-457. doi: 10.1289/ehp.1307883
- Xia Y, Wade TJ, Wu K, Li Y, Ning Z, Le XC, He X, Chen B, Feng Y, Mumford JL, 2009. Well water arsenic exposure, arsenic induced skin-lesions and self-reported morbidity in Inner Mongolia. *Int J Environ Res Public Health*, 6(3):1010-25. doi: 10.3390/ijerph6031010
- Zheng LY, Umans JG, Yeh F, Francesconi KA, Goessler W, Silbergeld EK, Bandeen-Roche K, Guallar E, Howard BV, Weaver VM and Navas-Acien A, 2015. The association of urine arsenic with prevalent and incident chronic kidney disease: evidence from the Strong Heart Study. *Epidemiology*, 26:601-612. doi: 10.1097/ede.0000000000000313
