# Supplementary material for: Update of the risk assessment of inorganic arsenic in food
Source: PubMed Central journal article supplement (PMC10794945; doi:10.2903/j.efsa.2024.8488), 2024-01-18
Supplement: EFS2-22-e8488-s005.pdf [file EFS2-22-e8488-s005.pdf]

Annex to: Update of the risk assessment of inorganic arsenic in food.  
doi:10.2903/j.efsa.2024.8488

© European Food Safety Authority, 2024

## **Annex E4 Benchmark dose modelling reports**

### **Relative increase of the background incidence after adjustment for confounders by 50%**

Annex E4 provides a comprehensive overview of the benchmark dose (BMD) analyses carried out for the studies used in the uncertainty analysis, employing the model averaging technique. The BMD analyses were conducted in accordance with the EFSA BMD guidance (EFSA Scientific Committee, 2022).

#### **E4.1 Selection of the BMR**

The BMD is identified as the specific dose that corresponds to the desired BMR level. To assess the uncertainty associated with the BMD, a 90% confidence interval is estimated, with the lower bound denoted as BMDL and the upper bound as BMDU. The BMDL and BMDU values help to quantify the range within which the true BMD value is expected to lie.

As BMR the CONTAM Panel decided to use a relative increase of the background incidence after adjustment for confounders by 50%.

#### **E4.2 Software Used**

Results are obtained using the EFSA web-tool for Bayesian BMD analysis, which uses the R-package [BMABMDR] version 0.0.0.9060 for the underlying calculations.

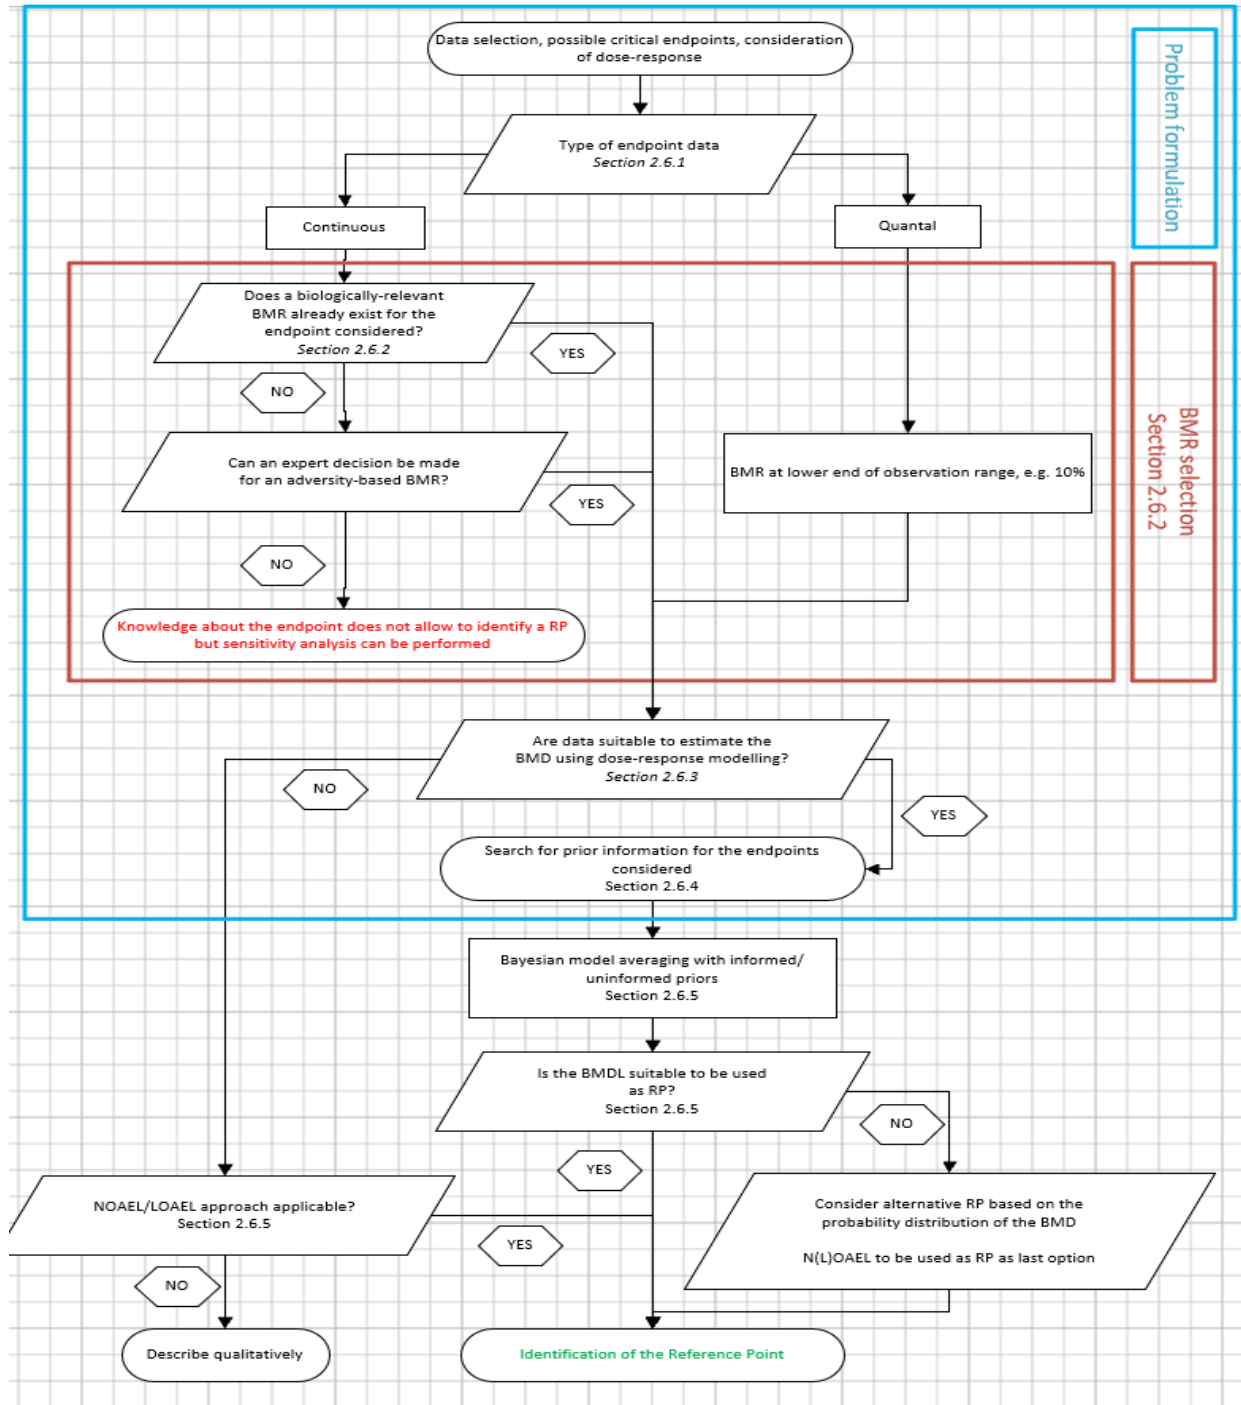

Flowchart to derive a Reference Point (RP) from a dose-response dataset of a specified endpoint, using BMD analysis. Figure from EFSA BMD guidance (EFSA Scientific Committee, 2022).

### E4.3 BMD modelling reports

#### Chen et al. (2010b) bladder cancer, relative BMR 50%

##### Data Description

The endpoint to be analyzed is: Adj.cases for bladder cancer

Data used for analysis:

| Exposure.µg.kg.bw.per.day | Adj.cases | N    |
|---------------------------|-----------|------|
| 0.927                     | 3         | 2288 |
| 2.288                     | 5         | 2093 |
| 4.743                     | 3         | 907  |
| 11.561                    | 7         | 909  |
| 17.018                    | 11        | 691  |

The 'Value for CES' is set to 0.00065646.

Extended dose range is not applied.

Informative background prior: min: 0.00129808; the most likely: 0.00131119; max: 0.00132430. Shape parameter is applied.

The 'Sampling Method' is set to Bridge Sampling.

##### Results

*Information pertaining to this endpoint.*

##### Goodness of Fit

Best fitting model fits sufficiently well (Bayes factor is 1.73e-04).

##### Model Averaged BMD

| Model          | Type | BMDL  | BMD   | BMDU  |
|----------------|------|-------|-------|-------|
| Model Averaged | BS   | 1.055 | 2.724 | 7.313 |

##### Estimated BMDs per model

| Model | BMDL  | BMD   | BMDU  | Model Weights | Converged |
|-------|-------|-------|-------|---------------|-----------|
| E4_Q  | 1.159 | 3.353 | 7.329 | 0.145         | 1         |
| IE4_Q | 2.108 | 5.507 | 9.576 | 0.029         | 1         |
| H4_Q  | 1.225 | 3.472 | 7.451 | 0.141         | 1         |
| LN4_Q | 1.667 | 4.668 | 9.500 | 0.068         | 1         |
| G4_Q  | 1.239 | 3.512 | 7.498 | 0.161         | 1         |
| QE4_Q | 0.960 | 1.769 | 3.178 | 0.317         | 1         |
| P4_Q  | 1.119 | 3.292 | 7.024 | 0.072         | 1         |
| L4_Q  | 1.081 | 3.314 | 7.332 | 0.066         | 1         |

**Plots of Fitted Models**

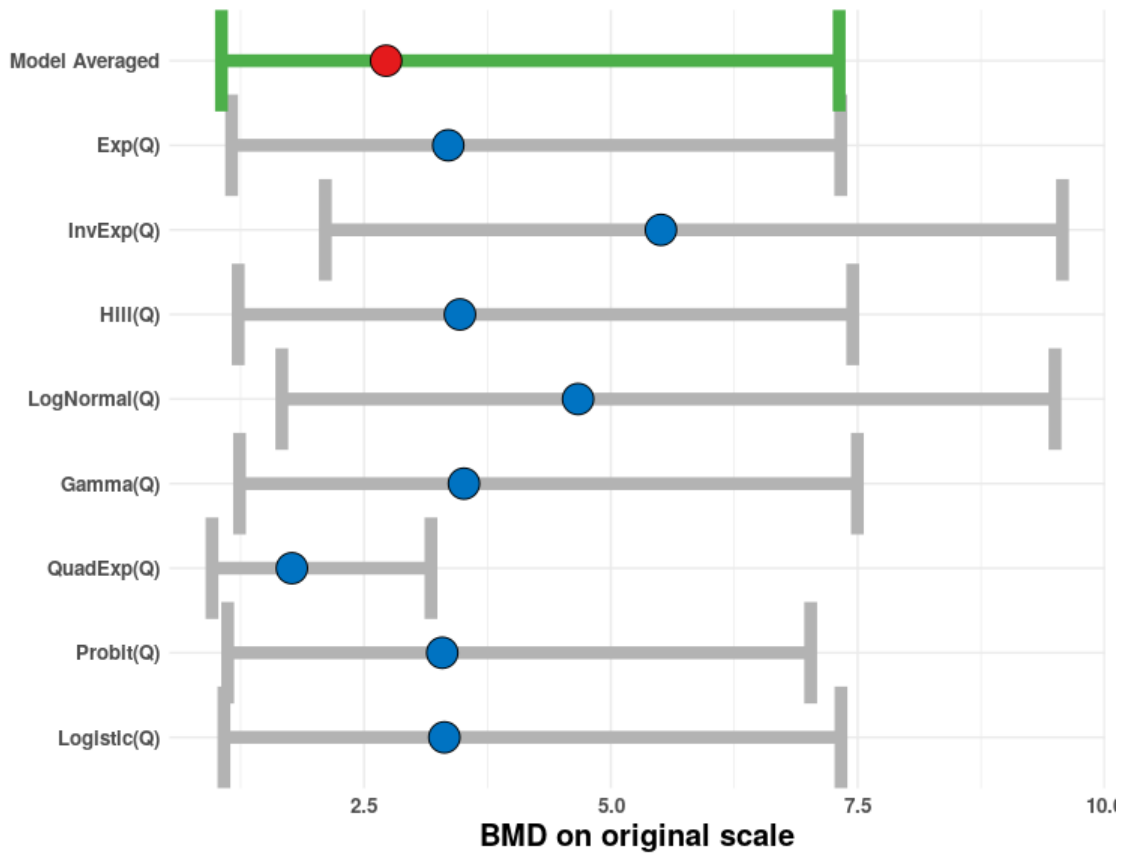

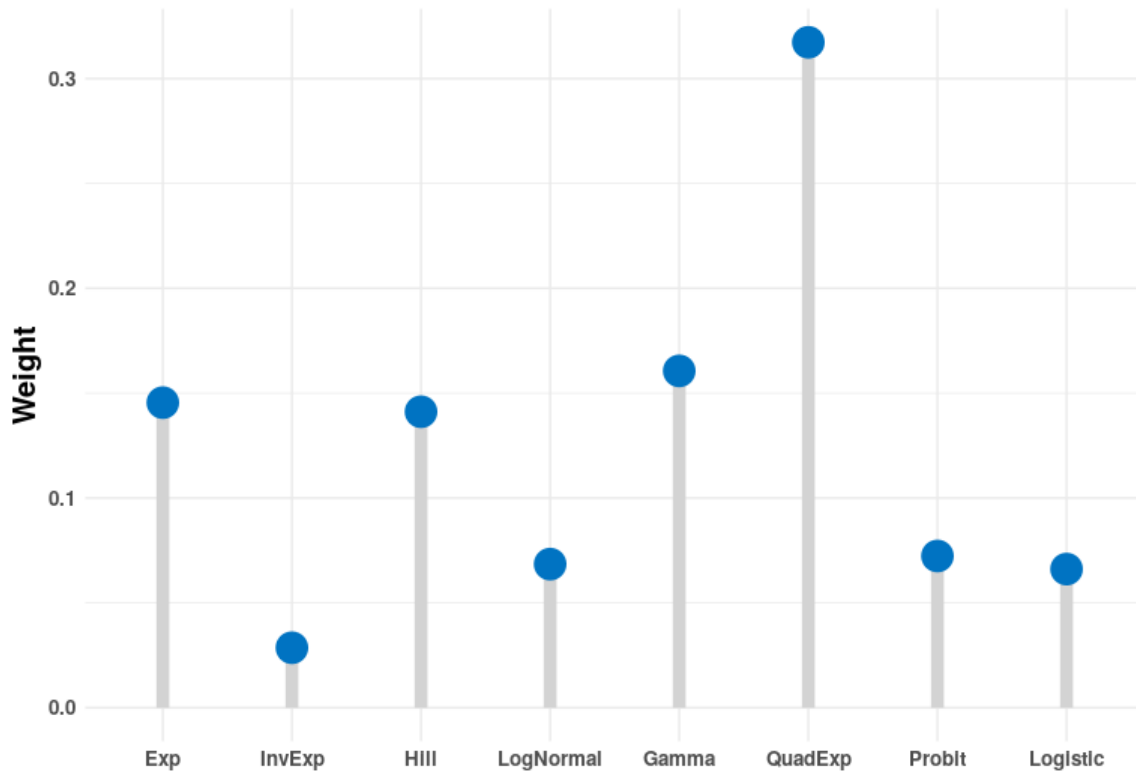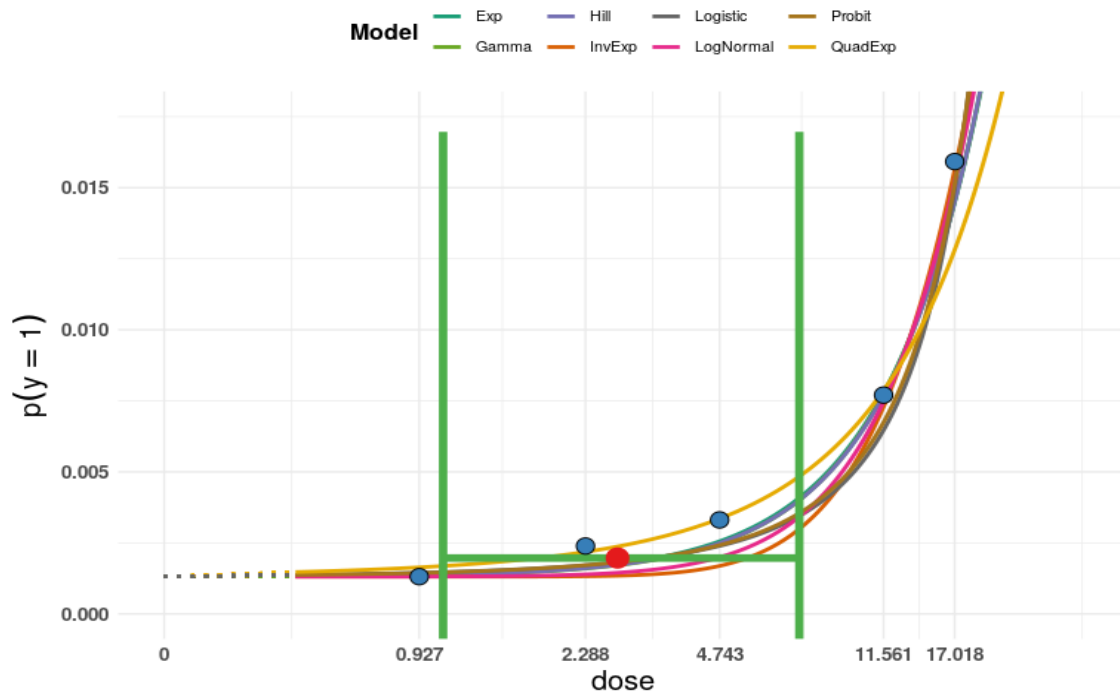

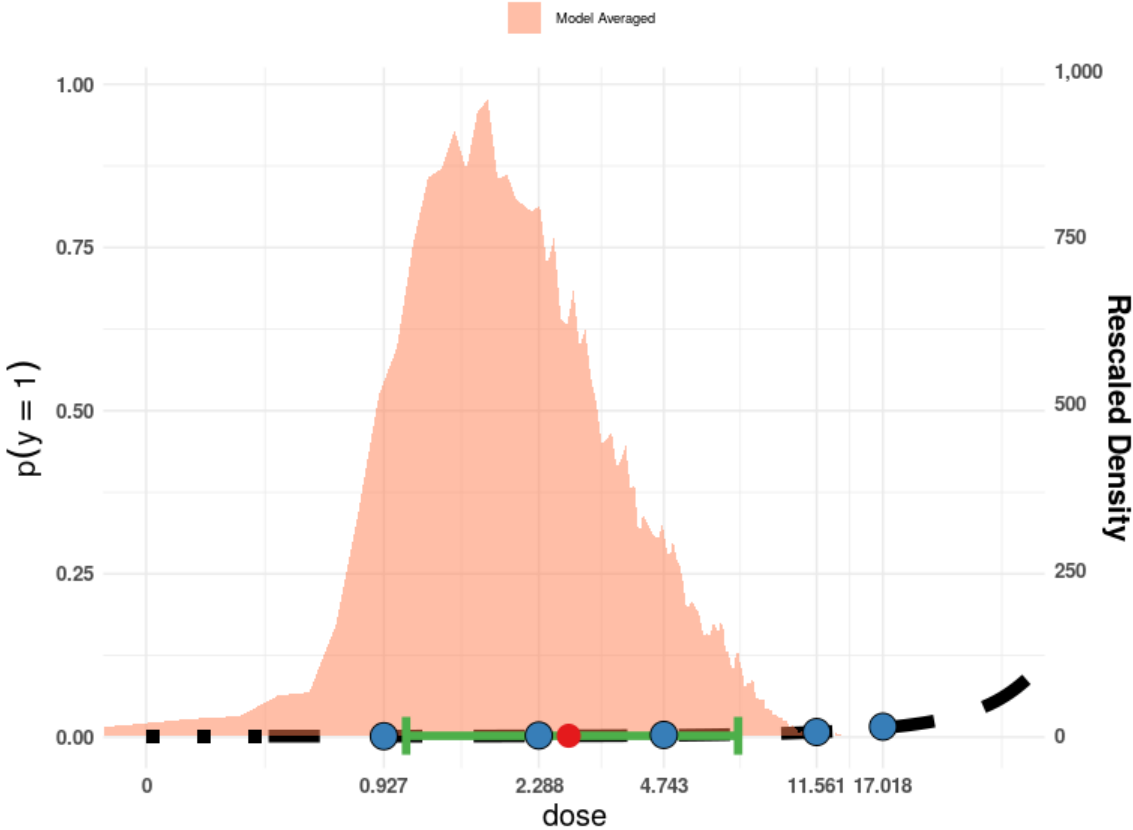

## Steinmaus et al. (2013) bladder cancer, relative BMR 50%

**Exposure: lifetime average before 1971, based on arsenic daily intakes**

### Data Description

The endpoint to be analyzed is: Adj.cases for bladder cancer

Data used for analysis:

| Exposure.µg.kg.bw.per.day | Adj.cases | N      |
|---------------------------|-----------|--------|
| 0.44                      | 30        | 140802 |
| 1.57                      | 36        | 136557 |
| 5.18                      | 74        | 108962 |
| 7.79                      | 92        | 63679  |

The 'Value for CES' is set to 0.00010656.

Extended dose range is applied.

Informative background prior: min: 0.00021093; the most likely: 0.00021307; max: 0.00021520. Shape parameter is applied.

The 'Sampling Method' is set to Bridge Sampling.

### Results

*Information pertaining to this endpoint.*

#### Goodness of Fit

Best fitting model fits sufficiently well (Bayes factor is 1.44e-03).

#### Model Averaged BMD

| Model          | Type | BMDL  | BMD   | BMDU  |
|----------------|------|-------|-------|-------|
| Model Averaged | BS   | 1.671 | 2.542 | 3.438 |

#### Estimated BMDs per model

| Model | BMDL  | BMD    | BMDU   | Model Weights | Converged |
|-------|-------|--------|--------|---------------|-----------|
| E4_Q  | 1.920 | 2.688  | 3.447  | 0.247         | 1         |
| IE4_Q | 2.208 | 3.080  | 3.831  | 0.024         | 1         |
| H4_Q  | 1.919 | 2.673  | 3.470  | 0.247         | 1         |
| LN4_Q | 2.080 | 2.914  | 3.702  | 0.091         | 1         |
| G4_Q  | 2.222 | 60.588 | 60.674 | 0.000         | 0         |
| QE4_Q | 1.379 | 1.856  | 2.259  | 0.114         | 1         |
| P4_Q  | 1.682 | 2.434  | 3.172  | 0.144         | 1         |
| L4_Q  | 1.704 | 2.406  | 3.139  | 0.133         | 1         |

Plots of Fitted Models

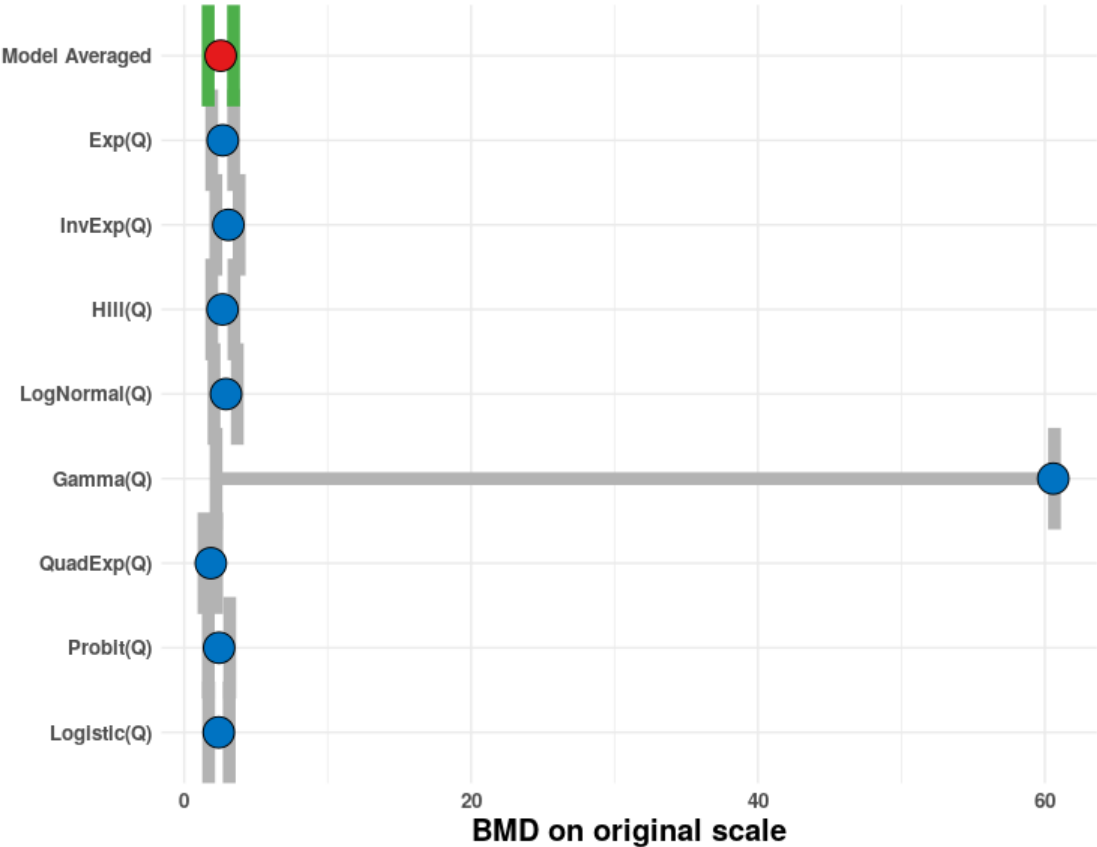



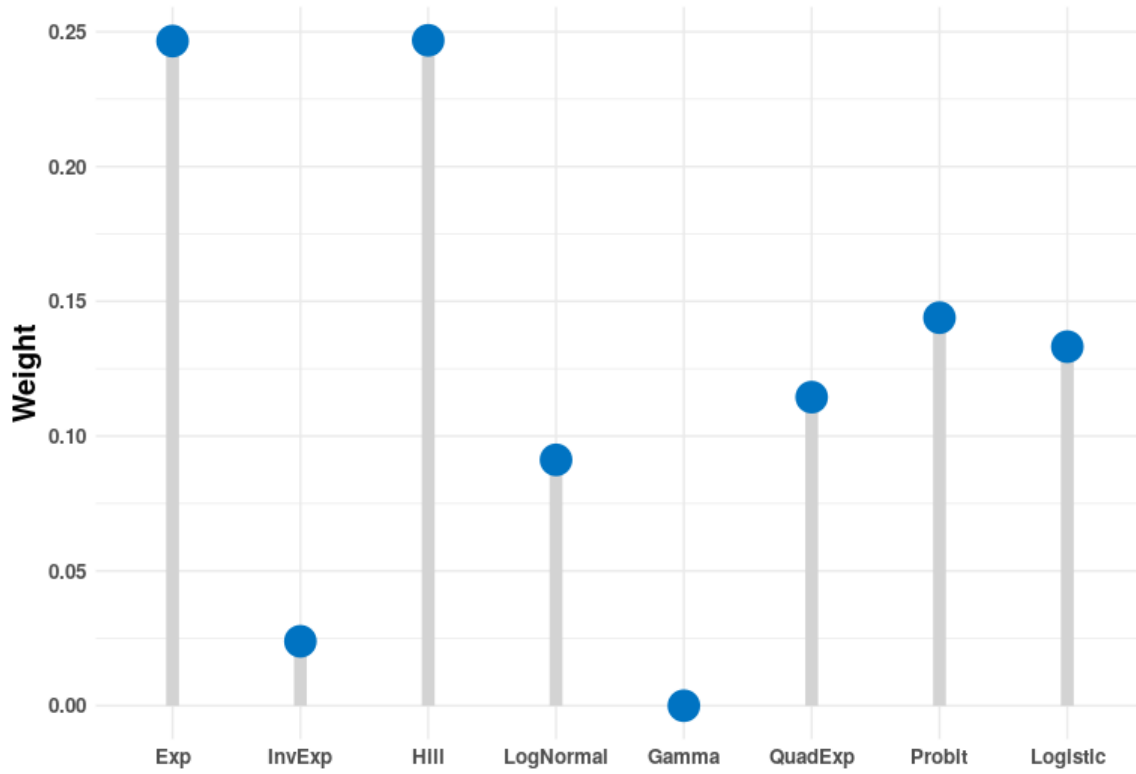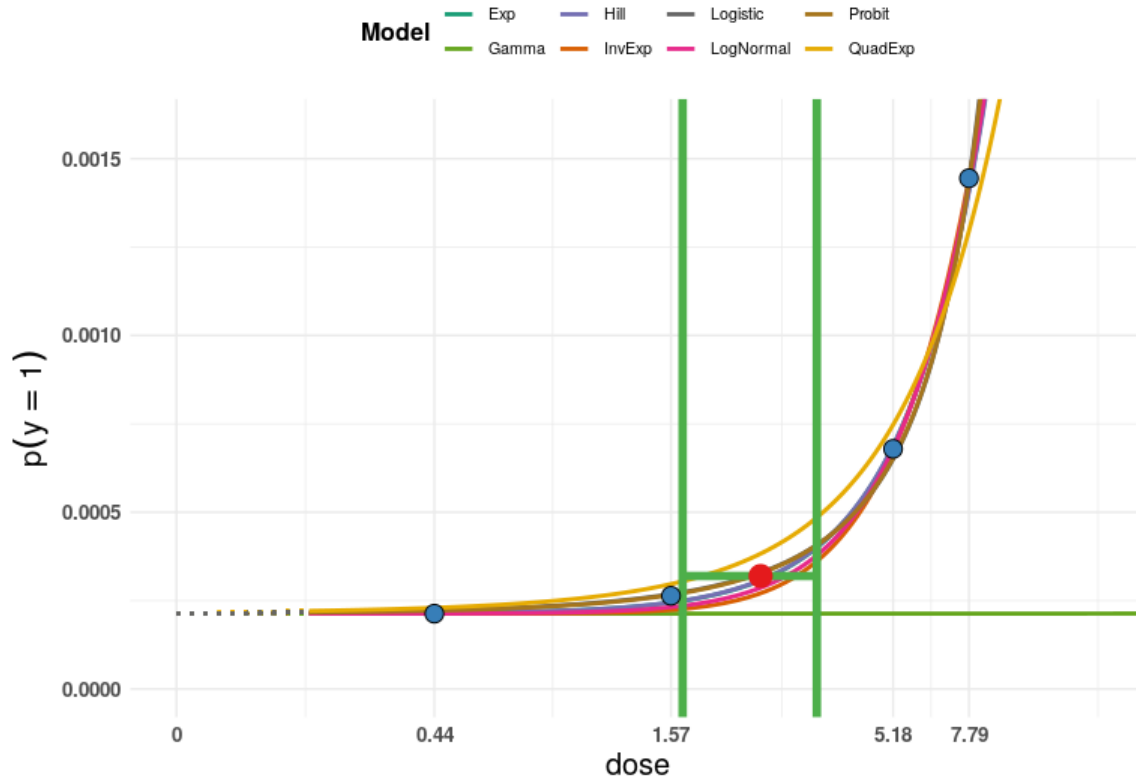

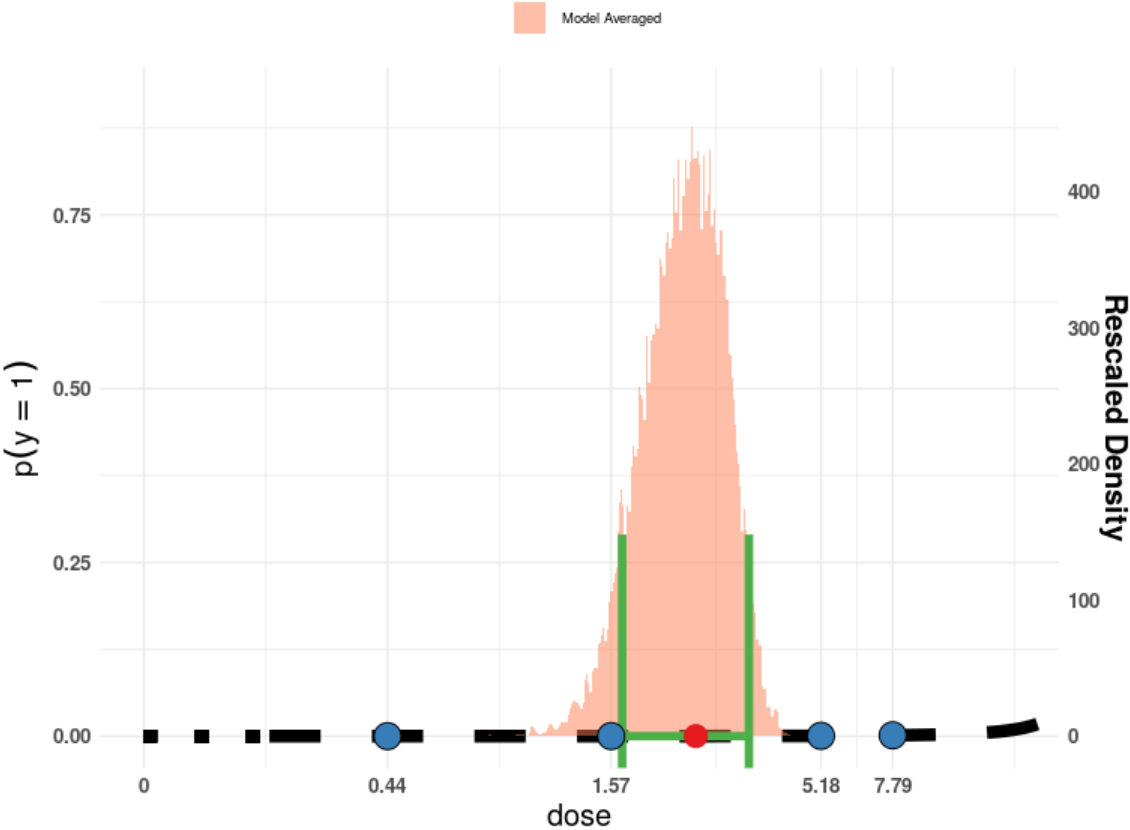

## Steinmaus et al. (2014a) lung cancer, relative BMR 50%

**Exposure: the highest 5-year average, based on arsenic daily intakes (the preferred exposure estimate for the study)**

### Data Description

The endpoint to be analyzed is: Adj.cases for lung cancer

Data used for analysis:

| Exposure.µg.kg.bw.per.day | Adj.cases | N     |
|---------------------------|-----------|-------|
| 0.36                      | 25        | 79688 |
| 0.70                      | 30        | 77344 |
| 2.00                      | 37        | 67969 |

The 'Value for CES' is set to 0.00015691.

Extended dose range is not applied.

Informative background prior: min: 0.00031059; the most likely: 0.00031372; max: 0.00031686. Shape parameter is applied.

The 'Sampling Method' is set to Bridge Sampling.

### Results

*Information pertaining to this endpoint.*

#### Goodness of Fit

Best fitting model fits sufficiently well (Bayes factor is 1.08e+00).

#### Model Averaged BMD

| Model          | Type | BMDL  | BMD   | BMDU  |
|----------------|------|-------|-------|-------|
| Model Averaged | BS   | 1.064 | 1.643 | 1.966 |

#### Estimated BMDs per model

| Model | BMDL  | BMD   | BMDU  | Model Weights | Converged |
|-------|-------|-------|-------|---------------|-----------|
| E4_Q  | 1.016 | 1.636 | 1.963 | 0.146         | 1         |
| IE4_Q | 1.524 | 1.915 | 1.993 | 0.021         | 1         |
| H4_Q  | 1.043 | 1.659 | 1.965 | 0.137         | 1         |
| LN4_Q | 1.294 | 1.829 | 1.984 | 0.050         | 1         |
| G4_Q  | 1.031 | 1.643 | 1.964 | 0.139         | 1         |
| QE4_Q | 1.064 | 1.542 | 1.943 | 0.270         | 1         |
| P4_Q  | 1.039 | 1.656 | 1.961 | 0.119         | 1         |
| L4_Q  | 1.132 | 1.695 | 1.972 | 0.118         | 1         |

**Plots of Fitted Models**

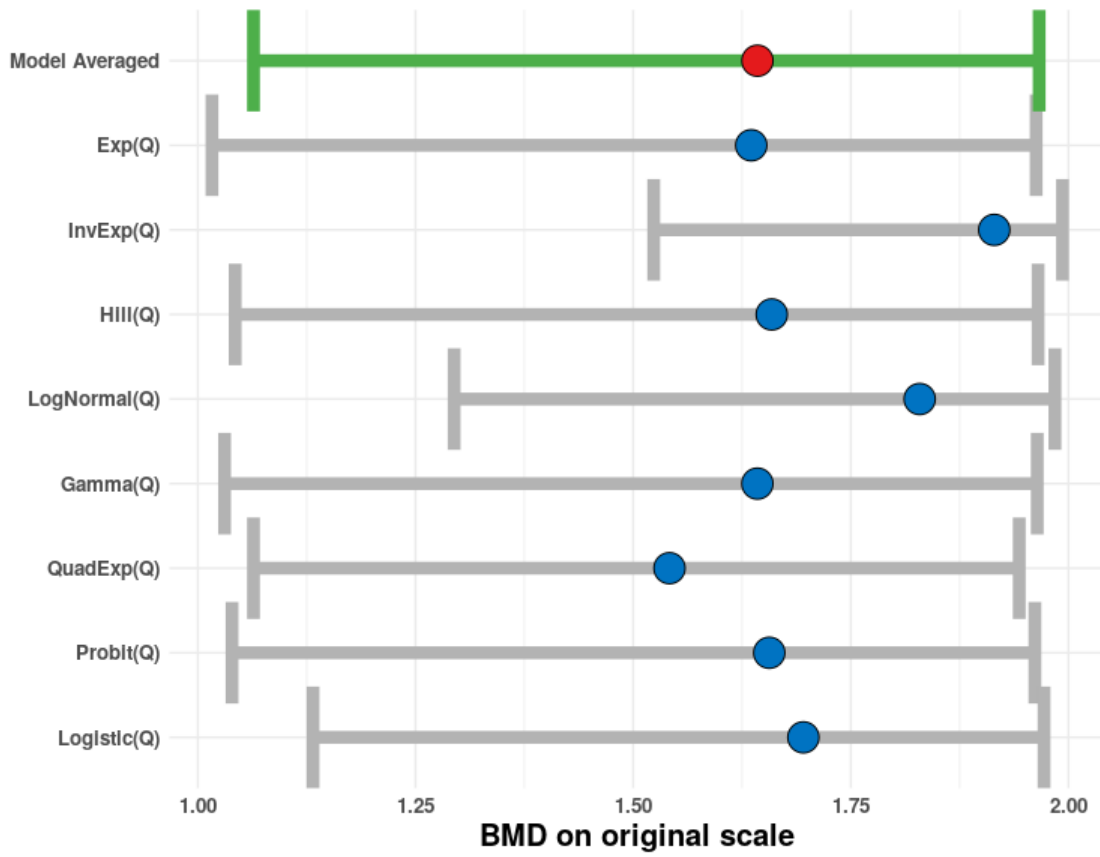

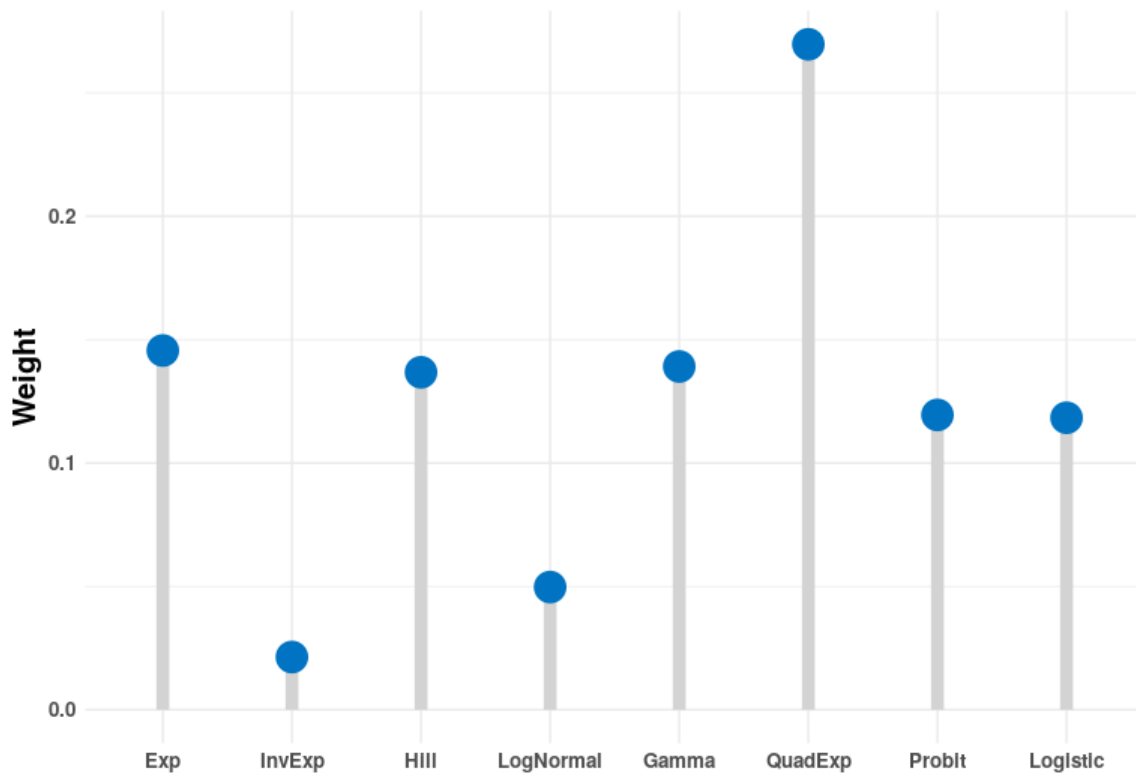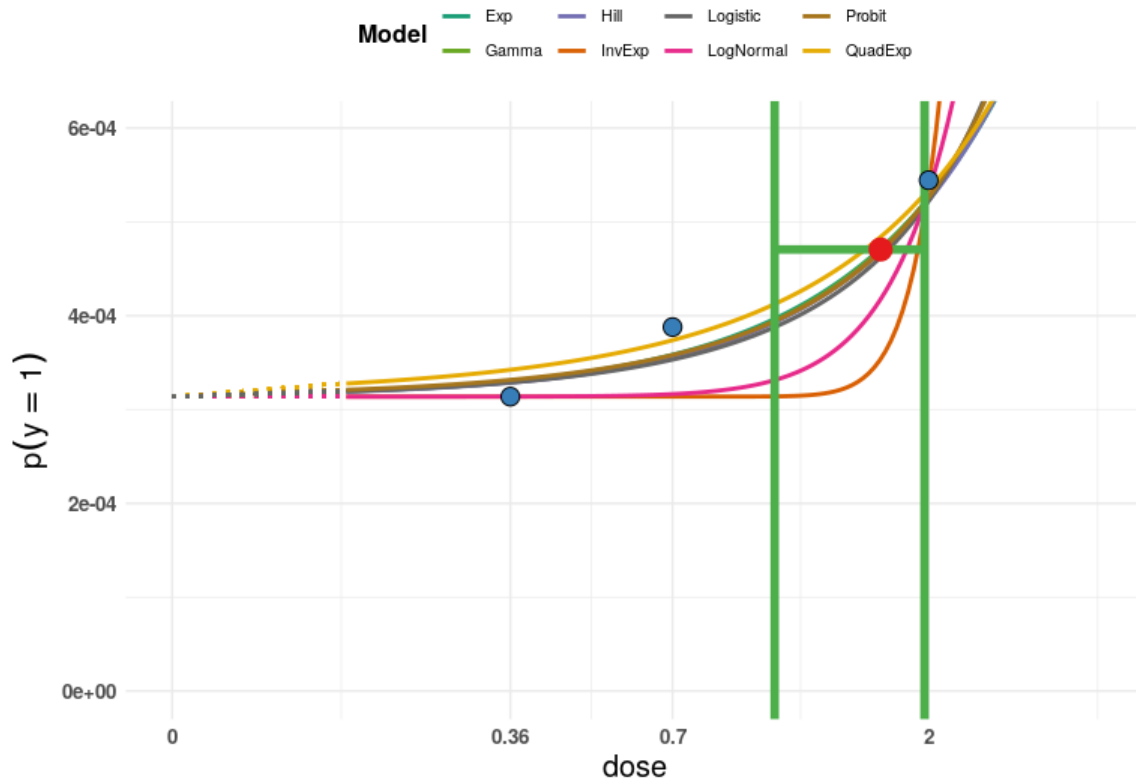

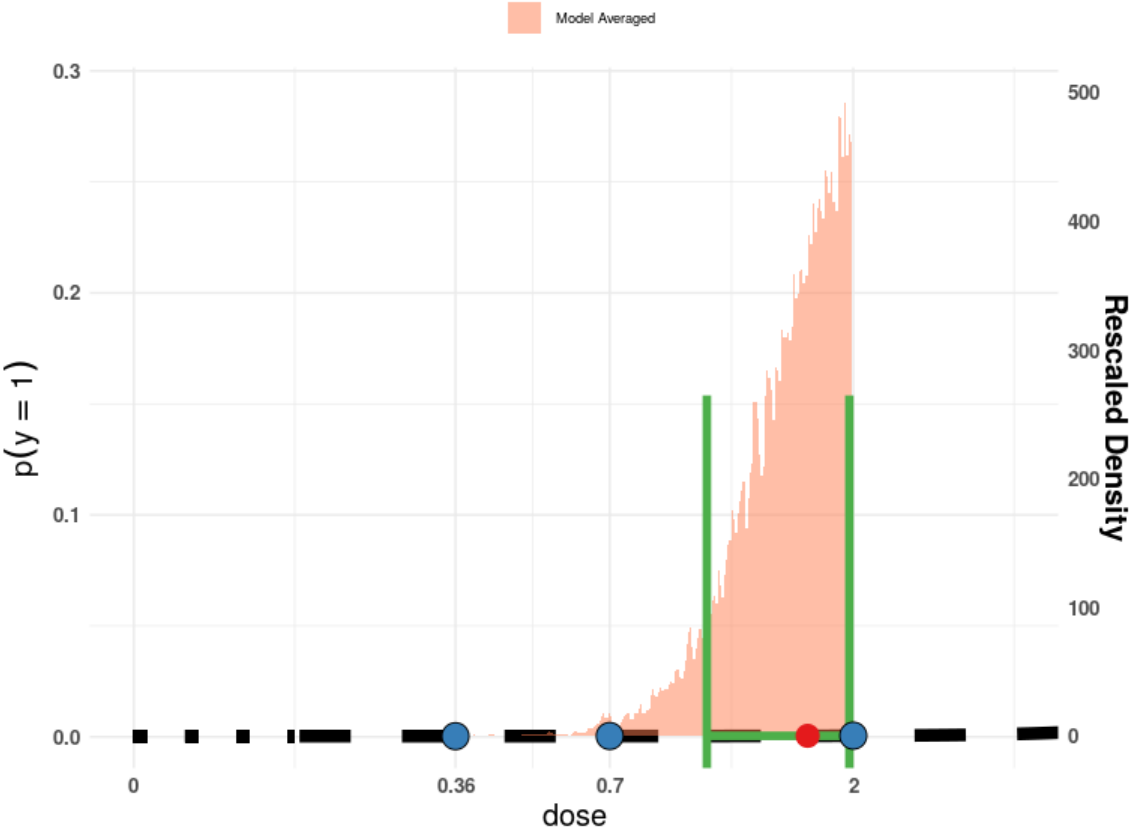

## References

Chen CL, Chiou HY, Hsu LI, Hsueh YM, Wu MM, Wang YH and Chen CJ, 2010b. Arsenic in drinking water and risk of urinary tract cancer: a follow-up study from northeastern Taiwan. *Cancer Epidemiol Biomarkers Prev*, 19:101-110. doi: 10.1158/1055-9965.Epi-09-0333

EFSA Scientific Committee, More SJ, Bampidis V, Benford D, Bragard C, Halldorsson TI, Hernández-Jerez AF, Bennekou SH, Koutsoumanis K, Lambré C, Machera K, Mennes W, Mullins E, Nielsen SS, Schrenk D, Turck D, Younes M, Aerts M, Edler L, Sand S, Wright M, Binaglia M, Bottex B, Cortinas Abrahantes J and Schlatter J, 2022. Guidance on the use of the benchmark dose approach in risk assessment. *EFSA Journal* 2022;20(10):7584, 67 pp. <https://doi.org/10.2903/j.efsa.2022.7584>

Steinmaus CM, Ferreccio C, Romo JA, Yuan Y, Cortes S, Marshall G, Moore LE, Balmes JR, Liaw J, Golden T, Smith AH, 2013. Drinking water arsenic in northern Chile: high cancer risks 40 years after exposure cessation. *Cancer Epidemiol Biomarkers Prev*, 22(4):623-30.

Steinmaus C, Ferreccio C, Yuan Y, Acevedo J, González F, Perez L, Cortés S, Balmes JR, Liaw J, Smith AH, 2014a. Elevated lung cancer in younger adults and low concentrations of arsenic in water. *Am J Epidemiol*, 180(11):1082-7. doi: 10.1093/aje/kwu238
